# Supplementary material for: Altered expression of mitochondrial and extracellular matrix genes in the heart of human fetuses with chromosome 21 trisomy
Source: PubMed Central journal article supplement (PMC1964766; doi:10.1186/1471-2164-8-268), 2007-08-07
Supplement: 1471-2164-8-268-S1.pdf [file 1471-2164-8-268-S1.pdf]

**Table S1. – Genes expressed in human fetal heart at 18-22 weeks of gestation**

| Probe ID    | Presence call | Gene Name          | GenBank ID | Chromosomal location |
|-------------|---------------|--------------------|------------|----------------------|
| 208611_s_at | 15            | (ALPHA)II-SPECTRIN | U83867     | 9q33-q34             |
| 209665_at   | 13            | 101F6              | AF040704   | 3p21.3               |
| 204072_s_at | 15            | 13CDNA73           | NM_023037  | 13q12.3              |
| 214318_s_at | 14            | 13CDNA73           | W58342     | 13q12.3              |
| 214319_at   | 15            | 13CDNA73           | W58342     | 13q12.3              |
| 214711_at   | 12            | 15E1.2             | BE568184   | 12q24.31             |
| 40640_at    | 13            | 384D8-2            | U62317     | 22q13.33             |
| 211337_s_at | 14            | 76P                | BC000966   | 15q15                |
| 213266_at   | 15            | 76P                | BF592982   | 15q15                |
| 44702_at    | 15            | 7h3                | R77097     | ---                  |
| 216272_x_at | 15            | 7h3; FLJ13511      | AF209931   | 19p13.13             |
| 201180_s_at | 15            | 87U6               | J03198     | 1p13                 |
| 209447_at   | 15            | 8B7                | AF043290   | 6q25                 |
| 201129_at   | 15            | 9G8                | L22253     | 2p22.1               |
| 1053_at     | 13            | A1                 | M87338     | 7q11.23              |
| 202021_x_at | 15            | A121               | AF083441   | 17q21.31             |
| 210632_s_at | 11            | A2                 | L35853     | 17q21                |
| 221217_s_at | 15            | A2BP1              | NM_018723  | 16p13.3              |
| 217757_at   | 15            | A2M                | NM_000014  | 12p13.3-p12.3        |
| 219488_at   | 15            | A4GALT             | NM_017436  | 22q11.2-q13.2        |
| 218434_s_at | 14            | AACS               | NM_023928  | 12q24.31             |
| 201511_at   | 15            | AAMP               | NM_001087  | 2q35                 |
| 201000_at   | 15            | AARS               | NM_001605  | 16q22                |
| 205986_at   | 14            | AATK               | NM_004920  | ---                  |
| 65493_at    | 14            | ABC1               | AA555088   | 17q23.2-q23.3        |
| 203504_s_at | 15            | ABCA1              | AF285167   | 9q31.1               |
| 203505_at   | 15            | ABCA1              | AF285167   | 9q31.1               |
| 212772_s_at | 14            | ABCA2              | AL162060   | 9q34                 |
| 213353_at   | 15            | ABCA5              | BF693921   | 17q24.3              |
| 204719_at   | 15            | ABCA8              | NM_007168  | 17q24                |
| 207819_s_at | 13            | ABCB4              | NM_000443  | 7q21.1               |
| 202804_at   | 15            | ABCC1              | AI539710   | 16p13.1              |
| 213485_s_at | 12            | ABCC10             | AK000002   | 6p21.1               |
| 203196_at   | 10            | ABCC4              | AI948503   | 13q32                |
| 214033_at   | 12            | ABCC6              | AI084637   | 16p13.1              |
| 208561_at   | 13            | ABCC9              | NM_020297  | 12p12.1              |
| 208562_s_at | 10            | ABCC9              | NM_020297  | 12p12.1              |
| 202850_at   | 15            | ABCD3              | NM_002858  | 1p22-p21             |
| 203981_s_at | 15            | ABCD4              | AL574660   | 14q24.3              |
| 201872_s_at | 15            | ABCE1              | NM_002940  | 4q31                 |
| 201873_s_at | 15            | ABCE1              | NM_002940  | 4q31                 |
| 200045_at   | 15            | ABCF1              | NM_001090  | 6p21.33              |
| 207622_s_at | 11            | ABCF2              | NM_005692  | 7q36                 |
| 202394_s_at | 14            | ABCF3              | NM_018358  | 3q27.3               |
| 204567_s_at | 15            | ABCG1              | NM_004915  | 21q22.3              |
| 211113_s_at | 14            | ABCG1              | U34919     | 21q22.3              |
| 218633_x_at | 15            | ABHD10             | NM_018394  | 3q13.13              |
| 210006_at   | 15            | ABHD14A            | BC002571   | 3p21.1               |

|             |    |                    |           |                |
|-------------|----|--------------------|-----------|----------------|
| 205566_at   | 13 | ABHD2              | NM_007011 | 15q26.1        |
| 213017_at   | 14 | ABHD3              | AL534702  | 18q11.2        |
| 218581_at   | 14 | ABHD4              | NM_022060 | 14q11.2        |
| 45288_at    | 12 | ABHD6              | AA209239  | 3p21.2         |
| 209027_s_at | 15 | ABI1               | BF673013  | 10p11.2        |
| 207268_x_at | 14 | ABI2               | NM_005759 | 2q33           |
| 202123_s_at | 15 | ABL1               | NM_005157 | 9q34.1         |
| 200965_s_at | 15 | ABLIM1             | NM_006720 | 10q25          |
| 210461_s_at | 15 | ABLIM1             | BC002448  | 10q25          |
| 205730_s_at | 15 | ABLIM3             | NM_014945 | 5q33.1         |
| 208634_s_at | 15 | abp620             | AB029290  | 1p32-p31       |
| 212895_s_at | 15 | ABR                | AL527773  | 17p13.3        |
| 202025_x_at | 15 | ACAA1              | NM_001607 | 3p23-p22       |
| 214274_s_at | 15 | ACAA1              | AI860341  | 3p23-p22       |
| 202003_s_at | 15 | ACAA2              | NM_006111 | 18q21.1        |
| 43427_at    | 15 | ACACB              | AI970898  | 12q24.1        |
| 49452_at    | 15 | ACACB              | AI057637  | 12q24.1        |
| 219986_s_at | 13 | ACAD10             | NM_025247 | 12q24.2        |
| 221669_s_at | 15 | ACAD8              | BC001964  | 11q25          |
| 206068_s_at | 12 | ACADL              | NM_001608 | 2q34-q35       |
| 202502_at   | 15 | ACADM              | NM_000016 | 1p31           |
| 202366_at   | 15 | ACADS              | NM_000017 | 12q22-qter     |
| 200710_at   | 15 | ACADVL             | NM_000018 | 17p13-p11      |
| 205412_at   | 15 | ACAT1              | NM_000019 | 11q22.3-q23.1  |
| 209608_s_at | 15 | ACAT2              | BC000408  | 6q25.3-q26     |
| 222010_at   | 15 | ACAT2              | BF224073  | 6q25.3-q26     |
| 222011_s_at | 15 | ACAT2              | BF224073  | 6q25.3-q26     |
| 221641_s_at | 15 | ACATE2             | AF241787  | Xp22.13        |
| 202323_s_at | 11 | ACBD3              | AI636775  | 1q42.13        |
| 202324_s_at | 15 | ACBD3              | NM_022735 | 1q42.13        |
| 209389_x_at | 15 | ACBP               | M15887    | 2q12-q21       |
| 211070_x_at | 15 | ACBP               | BC006466  | 2q12-q21       |
| 209874_x_at | 12 | ACDP2              | AK023066  | 10q24.33       |
| 219962_at   | 15 | ACE2               | NM_021804 | Xp22           |
| 222257_s_at | 15 | ACEH; DKFZP434A014 | AK026461  | Xp22           |
| 214894_x_at | 15 | ACF7               | AK023285  | 1p32-p31       |
| 215222_x_at | 15 | ACF7               | AK023406  | 1p32-p31       |
| 209320_at   | 15 | AC-III             | AF033861  | 2p24-p22       |
| 209321_s_at | 15 | AC-III             | AF033861  | 2p24-p22       |
| 201715_s_at | 15 | ACIN1              | NM_014977 | 14q11.2        |
| 201127_s_at | 13 | ACLY               | NM_001096 | 17q12-q21      |
| 201128_s_at | 15 | ACLY               | NM_001096 | 17q12-q21      |
| 218981_at   | 13 | ACN9               | NM_020186 | 7q22.1         |
| 207071_s_at | 15 | ACO1               | NM_002197 | 9p22-q32       |
| 200793_s_at | 15 | ACO2               | NM_001098 | 22q11.2-q13.31 |
| 202982_s_at | 15 | ACOT2              | NM_006821 | 14q24.3        |
| 208002_s_at | 15 | ACOT7              | NM_007274 | 1p36.31-p36.11 |
| 204212_at   | 14 | ACOT8              | NM_005469 | 20q12-q13.1    |
| 204241_at   | 12 | ACOX3              | BF055171  | 4p15.3         |
| 201629_s_at | 10 | ACP1               | NM_004300 | 2p25           |

|             |    |                |           |                |
|-------------|----|----------------|-----------|----------------|
| 201630_s_at | 15 | ACP1           | NM_004300 | 2p25           |
| 215227_x_at | 15 | ACP1           | BG035989  | 2p25           |
| 202767_at   | 15 | ACP2           | NM_001610 | 11p11.2-p11.11 |
| 218795_at   | 13 | ACP6           | NM_016361 | 1q21           |
| 207969_x_at | 14 | ACRV1          | NM_020109 | 11p12-q13      |
| 203872_at   | 15 | ACTA1          | NM_001100 | 1q42.13-q42.2  |
| 200974_at   | 15 | ACTA2          | NM_001613 | 10q23.3        |
| 200801_x_at | 15 | ACTB           | NM_001101 | 7p15-p12       |
| 205132_at   | 15 | ACTC           | NM_005159 | 15q11-q14      |
| 201550_x_at | 15 | ACTG1          | NM_001614 | 17q25          |
| 211970_x_at | 15 | ACTG1          | BG026805  | 17q25          |
| 211983_x_at | 15 | ACTG1          | BE741683  | 17q25          |
| 211995_x_at | 15 | ACTG1          | AL567820  | 17q25          |
| 212363_x_at | 15 | ACTG1          | AU145192  | 17q25          |
| 212988_x_at | 15 | ACTG1          | AL515810  | 17q25          |
| 213214_x_at | 15 | ACTG1          | AW190090  | 17q25          |
| 221607_x_at | 15 | ACTG1          | BC001920  | 17q25          |
| 202274_at   | 13 | ACTG2          | NM_001615 | 2p13.1         |
| 202666_s_at | 14 | ACTL6A         | NM_004301 | 3q27.1         |
| 208636_at   | 15 | ACTN1          | AI082078  | 14q24.1-q24.2  |
| 208637_x_at | 15 | ACTN1          | BC003576  | 14q24.1-q24.2  |
| 211160_x_at | 12 | ACTN1          | M95178    | 14q24.1-q24.2  |
| 203861_s_at | 15 | ACTN2          | AU146889  | 1q42-q43       |
| 203862_s_at | 15 | ACTN2          | H16245    | 1q42-q43       |
| 203863_at   | 15 | ACTN2          | NM_001103 | 1q42-q43       |
| 203864_s_at | 15 | ACTN2          | NM_001103 | 1q42-q43       |
| 222230_s_at | 15 | ACTR11; HARP11 | AK022248  | 14q22.3        |
| 200720_s_at | 15 | ACTR1A         | AL532341  | 10q24.33       |
| 200721_s_at | 15 | ACTR1A         | NM_005736 | 10q24.33       |
| 202135_s_at | 15 | ACTR1B         | NM_005735 | 2q11.1-q11.2   |
| 200727_s_at | 10 | ACTR2          | AA699583  | 2p14           |
| 200728_at   | 15 | ACTR2          | BE566290  | 2p14           |
| 200729_s_at | 15 | ACTR2          | BE566290  | 2p14           |
| 200996_at   | 15 | ACTR3          | NM_005721 | 2q14.1         |
| 213101_s_at | 15 | ACTR3          | Z78330    | 2q14.1         |
| 213102_at   | 15 | ACTR3          | Z78330    | 2q14.1         |
| 219623_at   | 15 | ACTR5          | NM_024855 | 20q12          |
| 218395_at   | 15 | ACTR6          | NM_022496 | 12q23.3        |
| 218658_s_at | 10 | ACTR8          | BF967592  | ---            |
| 213198_at   | 15 | ACVR1B         | AL117643  | 12q13          |
| 205327_s_at | 13 | ACVR2A         | NM_001616 | 2q22.2-q23.3   |
| 220028_at   | 11 | ACVR2B         | NM_001106 | 3p22           |
| 202740_at   | 15 | ACY1           | NM_000666 | 3p21.1         |
| 205260_s_at | 15 | ACYP1          | NM_001107 | 14q24.3        |
| 206833_s_at | 15 | ACYP2          | NM_001108 | 2p16.2         |
| 209891_at   | 14 | AD024          | AF225416  | 2q31.1         |
| 215273_s_at | 11 | ADA3           | AK024982  | 3p25.3         |
| 202603_at   | 15 | ADAM10         | N51370    | 15q2           |
| 202604_x_at | 14 | ADAM10         | NM_001110 | 15q2           |
| 214895_s_at | 13 | ADAM10         | AU135154  | 15q2           |

|             |    |                     |           |                   |
|-------------|----|---------------------|-----------|-------------------|
| 205745_x_at | 14 | ADAM17              | NM_003183 | 2p25              |
| 213532_at   | 15 | ADAM17              | AI797833  | 2p25.2            |
| 209765_at   | 15 | ADAM19              | AF311317  | 5q32-q33          |
| 207665_at   | 13 | ADAM21              | NM_003813 | 14q24.1           |
| 206046_at   | 15 | ADAM23              | NM_003812 | 2q33              |
| 213808_at   | 15 | ADAM23              | BE674466  | ---               |
| 202381_at   | 15 | ADAM9               | NM_003816 | 8p11.22           |
| 222162_s_at | 15 | ADAMTS1             | AK023795  | 21q21.2           |
| 214913_at   | 14 | ADAMTS3             | AB002364  | 4q21.1            |
| 219935_at   | 15 | ADAMTS5             | NM_007038 | 21q21.3           |
| 220676_at   | 13 | ADAMTS8             | NM_007037 | 11q25             |
| 220287_at   | 14 | ADAMTS9             | NM_020249 | 3p14.3-p14.2      |
| 201786_s_at | 15 | ADAR                | NM_001111 | 1q21.1-q21.2      |
| 203865_s_at | 11 | ADARB1              | NM_015833 | 21q22.3           |
| 44120_at    | 14 | ADCK2               | AI879381  | 7q32-q34          |
| 213245_at   | 12 | ADCY1               | AL120173  | 7p13-p12          |
| 209195_s_at | 15 | ADCY6               | AF250226  | 12q12-q13         |
| 204497_at   | 15 | ADCY9               | AB011092  | 16p13.3           |
| 208030_s_at | 15 | ADD1                | NM_001119 | 4p16.3 /// 4p16.3 |
| 214726_x_at | 14 | ADD1                | AL556041  | 4p16.3            |
| 214736_s_at | 15 | ADD1                | BE898639  | 4p16.3            |
| 201034_at   | 15 | ADD3                | BE545756  | 10q24.2-q24.3     |
| 201752_s_at | 15 | ADD3                | AI763123  | 10q24.2-q24.3     |
| 201753_s_at | 15 | ADD3                | NM_019903 | 10q24.2-q24.3     |
| 205882_x_at | 15 | ADD3                | NM_016824 | 10q24.2-q24.3     |
| 209122_at   | 15 | ADFP                | BC005127  | 9p22.1            |
| 208847_s_at | 15 | ADH5                | M29872    | 4q21-q25          |
| 208848_at   | 15 | ADH5                | M30471    | 4q21-q25          |
| 217748_at   | 15 | ADIPOR1             | NM_015999 | 1p36.13-q41       |
| 201346_at   | 15 | ADIPOR2             | NM_024551 | 12p13.31          |
| 204119_s_at | 15 | ADK                 | NM_001123 | 10q22             |
| 204120_s_at | 12 | ADK                 | NM_001123 | 10q22             |
| 202912_at   | 15 | ADM                 | NM_001124 | 11p15.4           |
| 201773_at   | 15 | ADNP                | NM_015339 | 20q13.13          |
| 222366_at   | 13 | ADNP                | W86781    | ---               |
| 205481_at   | 15 | ADORA1              | NM_000674 | 1q32.1            |
| 205013_s_at | 15 | ADORA2A             | NM_000675 | 22q11.23          |
| 205891_at   | 12 | ADORA2B             | NM_000676 | 17p12-p11.2       |
| 220980_s_at | 13 | ADPGK               | NM_031284 | 15q22.33          |
| 214086_s_at | 15 | ADPRT2              | AK001980  | 14q11.2-q12       |
| 206170_at   | 13 | ADRB2               | NM_000024 | 5q31-q32          |
| 201281_at   | 15 | ADRM1               | NM_007002 | 20q13.33          |
| 202144_s_at | 15 | ADSL                | NM_000026 | 22q13.1           |
| 210250_x_at | 15 | ADSL                | AF067854  | 22q13.1           |
| 221761_at   | 15 | ADSS                | AA628948  | 1cen-q12          |
| 201792_at   | 14 | AEBP1               | NM_001129 | 7p13              |
| 221935_s_at | 14 | AER61               | AK023140  | 3p14.2            |
| 217729_s_at | 15 | AES                 | NM_001130 | 19p13.3           |
| 211071_s_at | 15 | AF1Q; RP11-316M1.10 | BC006471  | 1q21 /// 1q21     |
| 203563_at   | 12 | AFAP                | NM_021638 | 4p16              |

|             |    |               |           |                |
|-------------|----|---------------|-----------|----------------|
| 201924_at   | 15 | AFF1          | NM_005935 | 4q21           |
| 202486_at   | 15 | AFG3L2        | NM_006796 | 18p11          |
| 217939_s_at | 15 | AFTIPHILIN    | NM_017657 | 2p15           |
| 214693_x_at | 11 | AG1           | BE732345  | 1q21.2         |
| 215434_x_at | 11 | AG1           | AV684285  | ---            |
| 204333_s_at | 12 | AGA           | NM_000027 | 4q32-q33       |
| 216064_s_at | 12 | AGA           | W27131    | 4q32-q33       |
| 216733_s_at | 15 | AGAT          | X86401    | 15q15.1        |
| 218534_s_at | 15 | AGGF1         | NM_018046 | 5q14.1         |
| 222132_s_at | 15 | AGK; FLJ10842 | AJ278150  | 7q34           |
| 203566_s_at | 15 | AGL           | NM_000645 | 1p21           |
| 205608_s_at | 14 | AGP1          | U83508    | 8q22.3-q23     |
| 218096_at   | 15 | AGPAT5        | NM_018361 | 8p23.1         |
| 205401_at   | 14 | AGPS          | NM_003659 | 2q31           |
| 212285_s_at | 15 | AGRN          | AI424797  | 1p36.33        |
| 216268_s_at | 15 | AGS           | U77914    | 20p12.1-p11.23 |
| 202834_at   | 15 | AGT           | NM_000029 | 1q42-q43       |
| 204500_s_at | 15 | AGTPBP1       | NM_015239 | 9q22.1         |
| 205357_s_at | 15 | AGTR1         | NM_000685 | 3q21-q25       |
| 207294_at   | 14 | AGTR2         | NM_000686 | Xq22-q23       |
| 222321_at   | 14 | AGTR2         | AI911273  | Xq22-q23       |
| 200903_s_at | 15 | AHCY          | NM_000687 | 20cen-q13.1    |
| 200848_at   | 15 | AHCYL1        | AA479488  | 1p12           |
| 200849_s_at | 15 | AHCYL1        | AI589266  | 1p12           |
| 200850_s_at | 15 | AHCYL1        | NM_006621 | 1p12           |
| 221569_at   | 15 | AHI1          | AL136797  | 6q23.2         |
| 202820_at   | 13 | AHR           | NM_001621 | 7p15           |
| 201491_at   | 15 | AHSA1         | NM_012111 | 14q23.3-31     |
| 209464_at   | 14 | aik2          | AB011446  | 17p13.1        |
| 212543_at   | 14 | AIM1          | U83115    | 6q21           |
| 201781_s_at | 15 | AIP           | AL558532  | 11q13.3        |
| 201782_s_at | 15 | AIP           | NM_003977 | 11q13.3        |
| 209737_at   | 15 | AIP1          | AB014605  | 7q21           |
| 217097_s_at | 13 | AIP1          | AC004990  | ---            |
| 200611_s_at | 15 | AIP1; NORI-1  | AB010427  | 4p16.1         |
| 210935_s_at | 11 | AIP1; NORI-1  | AF274954  | 4p16.1         |
| 209493_at   | 15 | AIPC          | AF338650  | 5p13.3         |
| 219977_at   | 12 | AIPL1         | NM_014336 | 17p13.1        |
| 210005_at   | 12 | AIRS          | D32051    | 21q22.1        |
| 202587_s_at | 15 | AK1           | BC001116  | 9q34.1         |
| 208967_s_at | 15 | AK2           | U39945    | 1p34           |
| 212174_at   | 14 | AK2           | W02312    | 1p34           |
| 212175_s_at | 15 | AK2           | AW277253  | 1p34           |
| 204347_at   | 14 | AK3           | AI653169  | 9pter-p13      |
| 204348_s_at | 15 | AK3L1         | NM_013410 | 9pter-p13      |
| 210625_s_at | 15 | AKAP          | U34074    | 17q21-q23      |
| 201674_s_at | 15 | AKAP1         | BC000729  | 17q21-q23      |
| 201675_at   | 15 | AKAP1         | NM_003488 | 17q21-q23      |
| 213396_s_at | 15 | AKAP10        | AA456929  | 17p11.1        |
| 203156_at   | 15 | AKAP11        | NM_016248 | 13q13.3        |

|             |    |         |           |                 |
|-------------|----|---------|-----------|-----------------|
| 208325_s_at | 11 | AKAP13  | NM_006738 | 15q24-q25       |
| 209534_x_at | 15 | AKAP13  | BF222823  | 15q24-q25       |
| 221718_s_at | 15 | AKAP13  | M90360    | 15q24-q25       |
| 211172_x_at | 14 | AKAP18  | AF161075  | 6q23            |
| 210517_s_at | 15 | AKAP250 | AB003476  | 6q24-q25        |
| 205359_at   | 15 | AKAP6   | NM_004274 | 14q13.1         |
| 205771_s_at | 13 | AKAP7   | AL137063  | 6q23            |
| 218064_s_at | 14 | AKAP8L  | NM_014371 | 19p13.13-p13.12 |
| 210962_s_at | 15 | AKAP9   | AB019691  | 7q21-q22        |
| 201900_s_at | 15 | AKR1A1  | NM_006066 | 1p33-p32        |
| 201272_at   | 15 | AKR1B1  | NM_001628 | 7q35            |
| 204151_x_at | 15 | AKR1C1  | NM_001353 | 10p15-p14       |
| 202139_at   | 15 | AKR7A2  | NM_003689 | 1p35.1-p36.23   |
| 214259_s_at | 15 | AKR7A2  | AI144075  | 1p35.1-p36.23   |
| 216381_x_at | 12 | AKR7A2  | AL035413  | ---             |
| 207163_s_at | 15 | AKT1    | NM_005163 | 14q32.32        |
| 212607_at   | 15 | AKT3    | N32526    | 1q43-q44        |
| 212609_s_at | 14 | AKT3    | U79271    | 1q43-q44        |
| 218487_at   | 10 | ALAD    | BC000977  | 9q34            |
| 205633_s_at | 15 | ALAS1   | NM_000688 | 3p21.1          |
| 211560_s_at | 12 | ALAS2   | AF130113  | Xp11.21         |
| 201951_at   | 15 | ALCAM   | BF242905  | 3q13.1          |
| 201952_at   | 15 | ALCAM   | AA156721  | 3q13.1          |
| 214687_x_at | 15 | ALDA    | AK026577  | 16q22-q24       |
| 212224_at   | 13 | ALDH1A1 | NM_000689 | 9q21.13         |
| 201425_at   | 15 | ALDH2   | NM_000690 | 12q24.2         |
| 202053_s_at | 15 | ALDH3A2 | NM_000382 | 17p11.2         |
| 202054_s_at | 14 | ALDH3A2 | NM_000382 | 17p11.2         |
| 210544_s_at | 13 | ALDH3A2 | BC002430  | 17p11.2         |
| 211004_s_at | 13 | ALDH3B1 | BC002553  | 11q13           |
| 203722_at   | 13 | ALDH4A1 | NM_003748 | 1p36            |
| 204290_s_at | 15 | ALDH6A1 | NM_005589 | 14q24.3         |
| 221588_x_at | 15 | ALDH6A1 | AW612403  | 14q24.3         |
| 221589_s_at | 15 | ALDH6A1 | AW612403  | 14q24.2         |
| 221590_s_at | 15 | ALDH6A1 | AW612403  | 14q24.2         |
| 208950_s_at | 15 | ALDH7A1 | BC002515  | 5q31            |
| 208951_at   | 15 | ALDH7A1 | BC002515  | 5q31            |
| 201612_at   | 15 | ALDH9A1 | NM_000696 | 1q23.1          |
| 200966_x_at | 15 | ALDOA   | NM_000034 | 16q22-q24       |
| 202022_at   | 15 | ALDOC   | NM_005165 | 17cen-q12       |
| 213413_at   | 15 | ALF     | BG434174  | 2p16.3          |
| 215306_at   | 11 | ALF     | AL049443  | ---             |
| 210169_at   | 15 | ALG1    | AB007880  | 16p13.3         |
| 218203_at   | 15 | ALG5    | NM_013338 | 13q13.2         |
| 219649_at   | 15 | ALG6    | NM_013339 | 1p31.3          |
| 203545_at   | 15 | ALG8    | NM_024079 | 11pter-p15.5    |
| 219374_s_at | 14 | ALG9    | NM_024740 | 11q23           |
| 203935_at   | 15 | ALK2    | L02911    | 2q23-q24        |
| 205621_at   | 15 | ALKBH   | NM_006020 | 14q24           |
| 214220_s_at | 15 | ALMS1   | AW003635  | 2p13            |

|             |    |         |           |                |
|-------------|----|---------|-----------|----------------|
| 214707_x_at | 15 | ALMS1   | AB002326  | 2p13           |
| 204446_s_at | 13 | ALOX5   | NM_000698 | 10q11.2        |
| 209621_s_at | 15 | ALP     | AF002280  | 4q35           |
| 216377_x_at | 14 | ALPG    | X07247    | ---            |
| 204659_s_at | 12 | ALR     | AF124604  | 16p13.3-p13.12 |
| 219834_at   | 11 | ALS2CR8 | NM_024744 | 2q33.3         |
| 201964_at   | 12 | ALS4    | N64643    | 9q34.3         |
| 202550_s_at | 15 | ALS8    | AF160212  | 20q13          |
| 209424_s_at | 11 | AMACR   | AI796120  | 5p13.2-q11.1   |
| 209425_at   | 14 | AMACR   | AA888589  | 5p13.2-q11.1   |
| 201196_s_at | 14 | AMD2    | M21154    | 6q21-q22       |
| 201197_at   | 15 | AMD2    | M21154    | 6q21-q22       |
| 222108_at   | 14 | AMIGO2  | AC004010  | 12q13.11       |
| 204976_s_at | 13 | AMMERC1 | AK023637  | Xq22.3         |
| 203002_at   | 15 | AMOTL2  | NM_016201 | 3q21-q22       |
| 207755_at   | 13 | AMOTL2  | NM_025017 | ---            |
| 212360_at   | 15 | AMPD2   | AI916249  | 1p13.3         |
| 205257_s_at | 15 | AMPH    | NM_001635 | 7p14-p13       |
| 210202_s_at | 13 | AMPH2   | U87558    | 2q14           |
| 214439_x_at | 14 | AMPH2   | AF043899  | 2q14           |
| 204294_at   | 15 | AMT     | NM_000481 | 3p21.2-p21.1   |
| 203360_s_at | 10 | AMY-1   | D50692    | 1p33-p32.2     |
| 208498_s_at | 15 | AMY1A   | NM_004038 | 1p21 /// 1p21  |
| 218167_at   | 15 | AMZ2    | NM_016627 | 17q24.3        |
| 215425_at   | 14 | ANA     | AL049332  | 21q21.1-q21.2  |
| 207845_s_at | 15 | ANAPC10 | NM_014885 | 4q31           |
| 209001_s_at | 15 | ANAPC13 | BC005398  | 3q22.1         |
| 200098_s_at | 15 | ANAPC5  | T33068    | 12q24.31       |
| 208721_s_at | 14 | ANAPC5  | BF967271  | 12q24.31       |
| 208722_s_at | 15 | ANAPC5  | BC001081  | 12q24.31       |
| 211036_x_at | 15 | ANAPC5  | BC006301  | 12q24.31       |
| 209957_s_at | 15 | ANF     | M30262    | 1p36.21        |
| 205609_at   | 15 | ANGPT1  | NM_001146 | 8q22.3-q23     |
| 205572_at   | 10 | ANGPT2  | NM_001147 | 8p23.1         |
| 213001_at   | 15 | ANGPTL2 | AF007150  | 9q34           |
| 213004_at   | 15 | ANGPTL2 | AI074333  | 9q34           |
| 219514_at   | 11 | ANGPTL2 | NM_012098 | 9q34           |
| 208353_x_at | 14 | ANK1    | NM_020480 | 8p11.1         |
| 202920_at   | 15 | ANK2    | NM_001148 | 4q25-q27       |
| 202921_s_at | 15 | ANK2    | NM_001148 | 4q25-q27       |
| 206385_s_at | 15 | ANK3    | NM_020987 | 10q21          |
| 209442_x_at | 15 | ANK3    | AL136710  | 10q21          |
| 208772_at   | 11 | ANKHD1  | AU160676  | 5q31.3         |
| 214919_s_at | 15 | ANKHD1  | R39094    | ---            |
| 219081_at   | 15 | ANKHD1  | NM_024668 | 5q31.3         |
| 218769_s_at | 15 | ANKRA2  | NM_023039 | 5q12-q13       |
| 206029_at   | 14 | ANKRD1  | NM_014391 | 10q23.33       |
| 218093_s_at | 15 | ANKRD10 | NM_017664 | 13q34          |
| 212286_at   | 12 | ANKRD12 | AW572909  | 18p11.22       |
| 212289_at   | 13 | ANKRD12 | AW572909  | 18p11.22       |

|             |    |         |           |                     |
|-------------|----|---------|-----------|---------------------|
| 216563_at   | 10 | ANKRD12 | X80821    | 18p11.22            |
| 213005_s_at | 15 | ANKRD15 | D79994    | 9p24.3              |
| 212211_at   | 15 | ANKRD17 | AI986295  | 4q21.1-q21.21       |
| 218418_s_at | 15 | ANKRD25 | NM_015493 | 19p13.2             |
| 213035_at   | 13 | ANKRD28 | AI081194  | 3p25.1              |
| 211717_at   | 15 | ANKRD40 | BC005853  | 17q21.33            |
| 219069_at   | 14 | ANKRD49 | NM_017704 | 11q21               |
| 204671_s_at | 12 | ANKRD6  | BE677131  | 6q14.2-q16.1        |
| 204672_s_at | 11 | ANKRD6  | NM_014942 | 6q14.2-q16.1        |
| 212747_at   | 14 | ANKS1   | AI990523  | 6p21.31             |
| 201038_s_at | 14 | ANP32A  | T67821    | 15q22.3-q23         |
| 201043_s_at | 13 | ANP32A  | NM_006305 | 15q22.3-q23         |
| 201051_at   | 15 | ANP32A  | BE560202  | 15q22.3-q23         |
| 201305_x_at | 15 | ANP32B  | NM_006401 | 9q22.32             |
| 201306_s_at | 15 | ANP32B  | NM_006401 | 9q22.32             |
| 208103_s_at | 15 | ANP32E  | NM_030920 | 1q21.3 /// 1q21.3   |
| 221505_at   | 15 | ANP32E  | AW612574  | 1q21.3              |
| 32625_at    | 13 | ANPa    | X15357    | 1q21-q22            |
| 209369_at   | 15 | ANX3    | M63310    | 4q13-q22            |
| 201012_at   | 15 | ANXA1   | NM_000700 | 9q12-q21.2          |
| 206200_s_at | 15 | ANXA11  | NM_001157 | 10q23               |
| 214783_s_at | 11 | ANXA11  | BG177920  | ---                 |
| 201590_x_at | 15 | ANXA2   | NM_004039 | 15q21-q22           |
| 210427_x_at | 15 | ANXA2   | BC001388  | 15q21-q22           |
| 213503_x_at | 15 | ANXA2   | BE908217  | 15q21-q22           |
| 201301_s_at | 15 | ANXA4   | NM_001153 | 2p13                |
| 201302_at   | 15 | ANXA4   | NM_001153 | 2p13                |
| 200782_at   | 15 | ANXA5   | NM_001154 | 4q26-q28            |
| 200982_s_at | 15 | ANXA6   | NM_001155 | 5q32-q34            |
| 201366_at   | 15 | ANXA7   | NM_004034 | 10q21.1-q21.2       |
| 203074_at   | 15 | ANXA8   | NM_001630 | 10q11.2             |
| 208614_s_at | 15 | AOI     | M62994    | 3p14.3              |
| 209766_at   | 13 | AOP1    | AF118073  | 10q25-q26           |
| 209600_s_at | 14 | AOX     | S69189    | 17q24-q25           |
| 201464_x_at | 15 | AP1     | BC002646  | 1p32-p31            |
| 201466_s_at | 15 | AP1     | BC002646  | 1p32-p31            |
| 64418_at    | 14 | AP1GBP1 | AI472320  | 17q21.1             |
| 209635_at   | 15 | AP1S1   | BC003561  | 7q22.1              |
| 203300_x_at | 15 | AP1S2   | NM_003916 | Xp22.31             |
| 211779_x_at | 15 | AP2A2   | BC006155  | 11p15.5 /// 11p15.5 |
| 212159_x_at | 15 | AP2A2   | AI125280  | 11p15.5             |
| 215764_x_at | 14 | AP2A2   | AA877641  | 11p15.5             |
| 200612_s_at | 15 | AP2B1   | NM_001282 | 17q11.2-q12         |
| 200615_s_at | 15 | AP2B1   | AL567295  | 17q11.2-q12         |
| 200613_at   | 15 | AP2M1   | NM_004068 | 3q28                |
| 202120_x_at | 15 | AP2S1   | NM_004069 | 19q13.2-q13.3       |
| 208074_s_at | 15 | AP2S1   | NM_021575 | 19q13.2-q13.3       |
| 211047_x_at | 15 | AP2S1   | BC006337  | 19q13.2-q13.3       |
| 203142_s_at | 15 | AP3B1   | NM_003664 | 5q14.1              |
| 206592_s_at | 15 | AP3D1   | NM_003938 | 19p13.3             |



|             |    |              |           |               |
|-------------|----|--------------|-----------|---------------|
| 203410_at   | 15 | AP3M2        | NM_006803 | 8p11.2        |
| 202442_at   | 15 | AP3S1        | NM_001284 | 5q22          |
| 202398_at   | 12 | AP3S2        | BC002785  | 15q26.1       |
| 202399_s_at | 15 | AP3S2        | NM_005829 | 15q26.1       |
| 210277_at   | 15 | AP47B        | AF155159  | 14q12         |
| 210278_s_at | 13 | AP47B        | AF155159  | 14q12         |
| 204844_at   | 15 | APA; gp160   | L12468    | 4q25          |
| 209944_at   | 15 | APA1; APA-1  | BC000330  | 14q24.3       |
| 204859_s_at | 14 | APAF1        | NM_013229 | 12q23         |
| 215148_s_at | 15 | APBA3        | AI141541  | 19p13.3       |
| 202652_at   | 15 | APBB1        | NM_001164 | 11p15         |
| 212970_at   | 13 | APBB2        | AI694303  | 4p14          |
| 212985_at   | 14 | APBB2        | BF115739  | 4p14          |
| 204650_s_at | 15 | APBB3        | NM_006051 | 5q31          |
| 203525_s_at | 14 | APC          | AI375486  | 5q21-q22      |
| 203526_s_at | 14 | APC          | M74088    | 5q21-q22      |
| 210027_s_at | 15 | APE          | M80261    | 14q11.2-q12   |
| 205265_s_at | 15 | APEG1        | NM_005876 | 2q36.1        |
| 201284_s_at | 11 | APEH         | NM_001640 | 3p21.31       |
| 204408_at   | 11 | APEX2        | NM_014481 | Xp11.22       |
| 213026_at   | 15 | APG12L       | BE965998  | 5q21-q22      |
| 213930_at   | 15 | APG12L       | N51708    | 5q21-q22      |
| 208815_x_at | 15 | apg-2        | AB023420  | 5q31.1-q31.2  |
| 221492_s_at | 15 | APG3         | AF202092  | 3q13.2        |
| 213115_at   | 15 | APG4A        | AL031177  | Xq22.1-q22.3  |
| 204903_x_at | 15 | APG4B        | AL080168  | 2q37.3        |
| 212280_x_at | 15 | APG4B        | AA532726  | 2q37.3        |
| 210639_s_at | 15 | APG5L        | AF293841  | 6q21          |
| 218389_s_at | 15 | APH1A        | NM_016022 | 1p36.13-q31.3 |
| 208759_at   | 14 | APH2         | AF240468  | 1q22-q23      |
| 206536_s_at | 13 | API3         | U32974    | Xq25          |
| 201686_x_at | 12 | API5         | AF229254  | 11p12-q12     |
| 201687_s_at | 15 | API5         | NM_006595 | 11p12-q12     |
| 218698_at   | 15 | APIP         | NM_015957 | 11p13         |
| 32042_at    | 15 | APK1 antigen | S72904    | Xq25-q26.2    |
| 208248_x_at | 15 | APLP2        | NM_001642 | 11q23-q25     |
| 208702_x_at | 15 | APLP2        | BC000373  | 11q23-q25     |
| 208703_s_at | 15 | APLP2        | BG427393  | 11q23-q25     |
| 208704_x_at | 15 | APLP2        | BC000373  | 11q23-q25     |
| 211404_s_at | 15 | APLP2        | BC004371  | 11q23-q25     |
| 214875_x_at | 15 | APLP2        | AW001847  | 11q23-q25     |
| 203571_s_at | 10 | APM2         | BC004471  | 10q23.31      |
| 204450_x_at | 13 | APOA1        | NM_000039 | 11q23-q24     |
| 206160_at   | 15 | APOBEC2      | NM_006789 | 6p21          |
| 206632_s_at | 10 | APOBEC3B     | NM_004900 | 22q13.1-q13.2 |
| 204205_at   | 15 | APOBEC3G     | NM_021822 | 22q13.1-q13.2 |
| 206738_at   | 11 | APOC4        | NM_001646 | 19q13.2       |
| 201525_at   | 15 | APOD         | NM_001647 | 3q26.2-qter   |
| 203381_s_at | 15 | APOE         | NM_000041 | 19q13.2       |
| 203382_s_at | 15 | APOE         | NM_000041 | 19q13.2       |

|             |    |                    |           |               |
|-------------|----|--------------------|-----------|---------------|
| 212884_x_at | 15 | APOE               | AI358867  | 19q13.2       |
| 221087_s_at | 15 | APOL3              | NM_014349 | 22q13.1       |
| 205682_x_at | 12 | APOM               | NM_019101 | 6p21.31       |
| 200602_at   | 15 | APP                | NM_000484 | 21q21.2       |
| 211277_x_at | 15 | APP                | BC004369  | 21q21.2       |
| 214953_s_at | 15 | APP                | X06989    | 21q21.2       |
| 202268_s_at | 15 | APPBP1             | NM_003905 | 16q22         |
| 202629_at   | 15 | APPBP2             | AV681579  | 17q21-q23     |
| 202630_at   | 14 | APPBP2             | AA046411  | 17q21-q23     |
| 202631_s_at | 14 | APPBP2             | NM_006380 | 17q21-q23     |
| 209788_s_at | 10 | APPILS             | AF183569  | 5q15          |
| 218158_s_at | 13 | APPL               | NM_012096 | 3p21.1-p14.3  |
| 209500_x_at | 13 | APRIL              | AF114012  | 17p13.1       |
| 207956_x_at | 15 | APRIN              | NM_015928 | 13q12.3       |
| 215888_at   | 14 | APRIN              | AK026889  | 13q12.3       |
| 203219_s_at | 15 | APRT               | NM_000485 | 16q24         |
| 213892_s_at | 15 | APRT               | AA927724  | 16q24         |
| 205367_at   | 14 | APS                | NM_020979 | 7q22          |
| 216252_x_at | 11 | APT1               | Z70519    | 10q24.1       |
| 215566_x_at | 14 | APT-2; DJ886K2.4   | AK024724  | 1p36.12-p35.1 |
| 218527_at   | 15 | APTX               | NM_017692 | 9p13.3        |
| 207542_s_at | 15 | AQP1               | NM_000385 | 7p14          |
| 209047_at   | 15 | AQP1               | AL518391  | 7p14          |
| 39248_at    | 15 | AQP3               | N74607    | 9p13          |
| 212584_at   | 15 | AQR                | BG260519  | 15q13.3       |
| 35846_at    | 15 | AR7                | M24899    | 17q11.2       |
| 208736_at   | 15 | ARC21; p21-Arc     | AF004561  | 12q24.11      |
| 208679_s_at | 15 | ARC34              | AF279893  | 2q36.1        |
| 201176_s_at | 15 | ARCN1              | NM_001655 | 11q23.3       |
| 218185_s_at | 15 | Arcp; FLJ10511     | AK024053  | 8q12.3        |
| 210995_s_at | 10 | ARD1; ARFD1; RNF46 | AF230399  | 5q12.3        |
| 203025_at   | 15 | ARD1A              | NM_003491 | Xq28          |
| 200065_s_at | 15 | ARF1               | AF052179  | 1q42          |
| 208750_s_at | 15 | ARF1               | AF052179  | 1q42          |
| 200011_s_at | 15 | ARF3               | NM_001659 | 12q13         |
| 200734_s_at | 15 | ARF3               | BG341906  | 12q13         |
| 201096_s_at | 15 | ARF4               | AL537042  | 3p21.2-p21.1  |
| 201097_s_at | 15 | ARF4               | NM_001660 | 3p21.2-p21.1  |
| 203586_s_at | 15 | ARF4L              | U25771    | 17q12-q21     |
| 201526_at   | 15 | ARF5               | NM_001662 | 7q31.3        |
| 203312_x_at | 15 | ARF6               | NM_001663 | 7q22.1        |
| 214182_at   | 14 | ARF6               | AA243143  | 7q22.1        |
| 217888_s_at | 15 | ARFGAP1            | AL039370  | 20q13.33      |
| 202211_at   | 15 | ARFGAP3            | BC005122  | 22q13.2-q13.3 |
| 202956_at   | 15 | ARFGEF1            | NM_006421 | 8q13          |
| 218230_at   | 15 | ARFIP1             | AL044651  | 4q31.3        |
| 202109_at   | 10 | ARFIP2             | NM_012402 | 11p15         |
| 203174_s_at | 14 | ARFRP1             | NM_003224 | 20q13.3       |
| 215984_s_at | 14 | ARFRP1             | AL121845  | 20q13.3       |
| 206177_s_at | 11 | ARG1               | NM_000045 | 6q23          |

|             |    |             |           |                   |
|-------------|----|-------------|-----------|-------------------|
| 203945_at   | 14 | ARG2        | NM_001172 | 14q24.1-q24.3     |
| 203946_s_at | 15 | ARG2        | NM_001172 | 14q24.1-q24.3     |
| 57082_at    | 15 | ARH         | AA169780  | 1p36-p35          |
| 212724_at   | 15 | ARHE        | BG054844  | 2q23.3            |
| 202117_at   | 15 | ARHGAP1     | BG468434  | 11p12-q12         |
| 219431_at   | 10 | ARHGAP10    | NM_024605 | 4q31.22           |
| 207606_s_at | 15 | ARHGAP12    | NM_018287 | ---               |
| 218076_s_at | 15 | ARHGAP17    | NM_018054 | 16p12.2           |
| 37577_at    | 14 | ARHGAP19    | U79256    | 10q24.2           |
| 221030_s_at | 10 | ARHGAP24    | NM_031305 | 4q22.1 /// 4q22.1 |
| 205068_s_at | 15 | ARHGAP26    | BE671084  | 5q31              |
| 203910_at   | 15 | ARHGAP29    | NM_004815 | 1p22.1            |
| 217936_at   | 15 | ARHGAP5     | AW044631  | 14q12             |
| 206167_s_at | 14 | ARHGAP6     | NM_001174 | Xp22.3            |
| 47069_at    | 15 | ARHGAP8     | AA533284  | 22q13.31          |
| 211716_x_at | 15 | ARHGDIA     | BC005851  | 17q25.3           |
| 201288_at   | 15 | ARHGDIB     | NM_001175 | 12p12.3           |
| 213867_x_at | 15 | ARHGEF10    | AA809056  | ---               |
| 201334_s_at | 15 | ARHGEF12    | AB002380  | 11q23.3           |
| 205507_at   | 14 | ARHGEF15    | NM_014958 | 17p13.1           |
| 203756_at   | 11 | ARHGEF17    | NM_014786 | 11q13.3           |
| 207629_s_at | 12 | ARHGEF2     | NM_004723 | 1q21-q22          |
| 209435_s_at | 15 | ARHGEF2     | BC000265  | 1q21-q22          |
| 218501_at   | 13 | ARHGEF3     | NM_019555 | 3p21-p13          |
| 202547_s_at | 15 | ARHGEF7     | NM_003899 | 13q34             |
| 202548_s_at | 15 | ARHGEF7     | NM_003899 | 13q34             |
| 203264_s_at | 15 | ARHGEF9     | NM_015185 | Xq11.2            |
| 215506_s_at | 14 | ARHI; NOEY2 | AK021882  | 1p31              |
| 221789_x_at | 14 | ARHT2       | AK024450  | 16p13.3           |
| 222131_x_at | 13 | ARHT2       | BC004327  | 16p13.3           |
| 212152_x_at | 15 | ARID1A      | AI679080  | 1p35.3            |
| 218917_s_at | 15 | ARID1A      | NM_018450 | 1p35.3            |
| 205062_x_at | 15 | ARID4A      | NM_002892 | 14q22.3-q23.1     |
| 214139_at   | 10 | ARID4B      | AI051476  | 1q42.1-q43        |
| 221230_s_at | 15 | ARID4B      | NM_016374 | 1q42.1-q43        |
| 212614_at   | 15 | ARID5B      | BG285011  | 10q21.3           |
| 201878_at   | 15 | ARIH1       | NM_005744 | ---               |
| 201879_at   | 15 | ARIH1       | AI694332  | 15q24             |
| 201880_at   | 15 | ARIH1       | AL040708  | 15q24             |
| 201881_s_at | 15 | ARIH1       | NM_005744 | 15q24             |
| 201228_s_at | 12 | ARIH2       | NM_006321 | 3p21.2-p21.3      |
| 201229_s_at | 15 | ARIH2       | BC000422  | 3p21.2-p21.3      |
| 201230_s_at | 15 | ARIH2       | NM_006321 | 3p21.2-p21.3      |
| 201657_at   | 15 | ARL1        | BE890745  | 12q23.3           |
| 201658_at   | 15 | ARL1        | AU151560  | 12q23.3           |
| 201659_s_at | 15 | ARL1        | NM_001177 | 12q23.3           |
| 202564_x_at | 15 | ARL2        | NM_001667 | 11q12             |
| 202092_s_at | 14 | ARL2BP      | NM_012106 | 16q13             |
| 202641_at   | 15 | ARL3        | NM_004311 | 10q23.3           |
| 205020_s_at | 13 | ARL4A       | NM_005738 | 7p21-p15.3        |

|             |    |                  |           |               |
|-------------|----|------------------|-----------|---------------|
| 218150_at   | 15 | ARL5A            | NM_012097 | 2q24.1        |
| 211935_at   | 15 | ARL6IP           | D31885    | 16p12-p11.2   |
| 218216_x_at | 15 | ARL6IP4          | NM_016638 | 12q24.31      |
| 220597_s_at | 15 | ARL6IP4          | NM_018694 | 12q24.31      |
| 200760_s_at | 15 | ARL6IP5          | N92494    | 3p14          |
| 200761_s_at | 15 | ARL6IP5          | NM_006407 | 3p14          |
| 202207_at   | 12 | ARL7             | BG435404  | 2q37.2        |
| 217852_s_at | 15 | ARL8B            | NM_018184 | 3p26.1        |
| 217755_at   | 15 | ARM2; HN1A       | AF060925  | 17q25.2       |
| 203486_s_at | 15 | ARMC8            | NM_015396 | 3q22.3        |
| 203487_s_at | 15 | ARMC8            | NM_015396 | 3q22.3        |
| 218694_at   | 15 | ARMCX1           | NM_016608 | Xq21.33-q22.2 |
| 203404_at   | 15 | ARMCX2           | NM_014782 | Xq21.33-q22.2 |
| 217858_s_at | 15 | ARMCX3           | NM_016607 | Xq21.33-q22.2 |
| 219335_at   | 15 | ARMCX5           | NM_022838 | Xq22.1-q22.3  |
| 202655_at   | 15 | ARMET            | NM_006010 | 3p21.1        |
| 218221_at   | 14 | ARNT             | NM_001668 | 1q21          |
| 209121_x_at | 14 | ARP-1            | M64497    | 15q26         |
| 200950_at   | 15 | ARPC1A           | NM_006409 | 7q22.1        |
| 201954_at   | 15 | ARPC1B           | NM_005720 | 7q22.1        |
| 207988_s_at | 15 | ARPC2            | NM_005731 | 2q36.1        |
| 213513_x_at | 15 | ARPC2            | BG034239  | 2q36.1        |
| 211963_s_at | 15 | ARPC5            | AL516350  | 1q25.2        |
| 220966_x_at | 15 | ARPC5L           | NM_030978 | 9q34.11       |
| 214553_s_at | 15 | ARPP-19          | NM_006628 | 15q21.1       |
| 221482_s_at | 15 | ARPP-19          | AF084555  | 15q21.1       |
| 221483_s_at | 15 | ARPP-19          | AF084555  | 15q21.1       |
| 201680_x_at | 15 | ARS2             | NM_015908 | 7q21          |
| 222047_s_at | 15 | ARS2             | AI523895  | 7q21          |
| 217775_s_at | 14 | ARSDR1           | AF167438  | 14q24.1       |
| 217776_at   | 15 | ARSDR1           | AF167438  | 14q24.1       |
| 201837_s_at | 15 | ART1             | AF197954  | 2pter-p25.1   |
| 210147_at   | 15 | ART3             | U47054    | 4p15.1-p14    |
| 210385_s_at | 11 | ARTS-1           | AF106037  | 5q15          |
| 210980_s_at | 15 | ASAH1            | U47674    | 8p22-p21.3    |
| 213702_x_at | 15 | ASAH1            | AI934569  | 8p22-p21.3    |
| 213902_at   | 15 | ASAH1            | AI379338  | 8p22-p21.3    |
| 215178_x_at | 13 | AS AHL           | AV724215  | ---           |
| 212818_s_at | 13 | ASB-1            | AF055024  | 2q37          |
| 212819_at   | 11 | ASB-1            | AF055024  | 2q37          |
| 218841_at   | 15 | ASB8             | NM_024095 | 12q13.12      |
| 205673_s_at | 14 | ASB9             | NM_024087 | ---           |
| 215684_s_at | 13 | ASC1p100         | AL096741  | 22q12.1       |
| 219336_s_at | 15 | ASCC1            | NM_015947 | 10pter-q25.3  |
| 212815_at   | 15 | ASCC3            | AA156961  | 6q16          |
| 200058_s_at | 15 | ASCC3L1          | BC001417  | 2q11.2        |
| 201855_s_at | 14 | ASCIZ            | NM_015251 | 16q23.2       |
| 214468_at   | 15 | ASD3             | D00943    | 14q12         |
| 201742_x_at | 15 | ASF; SF2; SRp30a | M69040    | 17q21.3-q22   |
| 203427_at   | 15 | ASF1A            | NM_014034 | 6q22.31       |

|             |    |                         |           |            |
|-------------|----|-------------------------|-----------|------------|
| 218115_at   | 12 | ASF1B                   | NM_018154 | 19p13.13   |
| 215075_s_at | 15 | ASH                     | L29511    | 17q24-q25  |
| 218554_s_at | 13 | ASH1L                   | NM_018489 | 1q22       |
| 209517_s_at | 15 | ASH2L                   | AB020982  | 8p11.2     |
| 210094_s_at | 10 | ASIP                    | AF196186  | 10p11.22   |
| 221526_x_at | 12 | ASIP                    | AF196185  | 10p11.22   |
| 221527_s_at | 14 | ASIP                    | AF196185  | 10p11.22   |
| 203836_s_at | 10 | ASK1                    | D84476    | 6q22.33    |
| 204608_at   | 14 | ASL                     | NM_000048 | 7cen-q11.2 |
| 209394_at   | 13 | ASMTL                   | BC002508  | Xp22.3     |
| 36553_at    | 15 | ASMTL                   | AA669799  | Xp22.3     |
| 36554_at    | 15 | ASMTL                   | Y15521    | Xp22.3     |
| 202024_at   | 15 | ASNA1                   | NM_004317 | 19q13.3    |
| 205047_s_at | 14 | ASNS                    | NM_001673 | 7q21.3     |
| 202511_s_at | 15 | ASP; APG5; APG5L; hAPG5 | AK001899  | 6q21       |
| 202512_s_at | 14 | ASP; APG5; APG5L; hAPG5 | AK001899  | 6q21       |
| 207284_s_at | 14 | ASPH                    | NM_020164 | 8q12.1     |
| 219918_s_at | 14 | ASPM                    | NM_018123 | 1q31       |
| 219087_at   | 15 | ASPN                    | NM_017680 | 9q22       |
| 207076_s_at | 15 | ASS                     | NM_000050 | 9q34.1     |
| 213528_at   | 15 | AsTP2                   | AL035369  | 1q23.3     |
| 212234_at   | 11 | ASXL1                   | AL034550  | 20q11.1    |
| 212237_at   | 15 | ASXL1                   | N64780    | 20q11.1    |
| 212238_at   | 15 | ASXL1                   | AL117518  | 20q11.1    |
| 218659_at   | 15 | ASXL2                   | NM_018263 | 2p24.1     |
| 211509_s_at | 15 | ASY                     | AB015639  | 2p14-p13   |
| 210968_s_at | 15 | ASY                     | AF333336  | 2p14-p13   |
| 214629_x_at | 15 | ASY                     | AF320999  | 2p14-p13   |
| 218782_s_at | 13 | ATAD2                   | NM_014109 | 8q24.13    |
| 222103_at   | 15 | ATF1                    | AI434345  | 12q13      |
| 205446_s_at | 14 | ATF2                    | NM_001880 | 2q32       |
| 212984_at   | 15 | ATF2                    | BE786164  | 2q32       |
| 202672_s_at | 15 | ATF3                    | NM_001674 | 1q32.3     |
| 200779_at   | 15 | ATF4                    | NM_001675 | 22q13.1    |
| 204998_s_at | 15 | ATF5                    | BC005174  | 19q13.3    |
| 218987_at   | 15 | ATF7IP                  | NM_018179 | 12p13.2    |
| 219870_at   | 15 | ATF7IP2                 | NM_024997 | 16p13.2    |
| 204833_at   | 13 | ATG12                   | NM_004707 | 5q21-q22   |
| 214699_x_at | 11 | Atg21                   | AK024279  | 7p22.2     |
| 202492_at   | 15 | ATG9A                   | NM_024085 | 2q36.1     |
| 210858_x_at | 15 | ATM                     | U26455    | 11q22-q23  |
| 212672_at   | 15 | ATM                     | U82828    | 11q22-q23  |
| 203454_s_at | 15 | ATOX1                   | NM_004045 | 5q32       |
| 213238_at   | 15 | ATP10D                  | AI478147  | 4p12       |
| 213582_at   | 11 | ATP11A                  | BF439472  | 13q34      |
| 212536_at   | 15 | ATP11B                  | AB023173  | 3q27       |
| 218052_s_at | 14 | ATP13A1                 | NM_020410 | 19p13.11   |
| 212297_at   | 15 | ATP13A3                 | BF218804  | 3q29       |
| 220948_s_at | 15 | ATP1A1                  | NM_000701 | 1p13       |
| 203296_s_at | 15 | ATP1A2                  | NM_000702 | 1q21-q23   |

|             |    |          |           |                   |
|-------------|----|----------|-----------|-------------------|
| 201242_s_at | 15 | ATP1B1   | BC000006  | 1q24              |
| 201243_s_at | 15 | ATP1B1   | NM_001677 | 1q24              |
| 204311_at   | 12 | ATP1B2   | NM_001678 | 17p13.1           |
| 212361_s_at | 15 | ATP2A2   | AA805753  | 12q23-q24.1       |
| 212362_at   | 15 | ATP2A2   | AA805753  | 12q23-q24.1       |
| 209281_s_at | 15 | ATP2B1   | L14561    | 12q21-q23         |
| 212930_at   | 12 | ATP2B1   | AW576457  | 12q21-q23         |
| 215716_s_at | 14 | ATP2B1   | L14561    | 12q21-q23         |
| 212135_s_at | 15 | ATP2B4   | AW517686  | 1q25-q32          |
| 212136_at   | 15 | ATP2B4   | AW517686  | 1q25-q32          |
| 209934_s_at | 14 | ATP2C1   | AF225981  | 3q21-q24          |
| 211137_s_at | 14 | ATP2C1A  | AF189723  | 3q21-q24          |
| 213738_s_at | 15 | ATP5A1   | AI587323  | 18q12-q21         |
| 201322_at   | 15 | ATP5B    | NM_001686 | 12p13-qter        |
| 205711_x_at | 15 | ATP5C1   | NM_005174 | 10q22-q23         |
| 208870_x_at | 15 | ATP5C1   | BC000931  | 10q22-q23         |
| 213366_x_at | 15 | ATP5C1   | AV711183  | 10q22-q23         |
| 214132_at   | 15 | ATP5C1   | BG232034  | 10q22-q23         |
| 203926_x_at | 15 | ATP5D    | NM_001687 | 19p13.3           |
| 213041_s_at | 15 | ATP5D    | BE798517  | 19p13.3           |
| 217801_at   | 15 | ATP5E    | NM_006886 | 20q13.3           |
| 211755_s_at | 15 | ATP5F1   | BC005960  | 1p13.2 /// 1p13.2 |
| 208972_s_at | 15 | ATP5G1   | AL080089  | 17q21.33          |
| 207507_s_at | 15 | ATP5G3   | NM_001689 | 2q31.2            |
| 207508_at   | 15 | ATP5G3   | NM_001689 | 2q31.2            |
| 207335_x_at | 15 | ATP5I    | NM_007100 | 4p16.3            |
| 209492_x_at | 15 | ATP5I    | BC003679  | 4p16.3            |
| 202325_s_at | 15 | ATP5J    | NM_001685 | 21q21.1           |
| 202961_s_at | 15 | ATP5J2   | NM_004889 | 7q22.1            |
| 208746_x_at | 15 | ATP5JG   | AF070655  | 11q23             |
| 207573_x_at | 15 | ATP5L    | NM_006476 | 11q23             |
| 208745_at   | 15 | ATP5L    | AA917672  | 11q23             |
| 210453_x_at | 15 | ATP5L    | AL050277  | 11q23             |
| 200818_at   | 15 | ATP5O    | NM_001697 | 21q22.1-q22.2     |
| 216954_x_at | 15 | ATP5O    | S77356    | 21q22.1-q22.2     |
| 206992_s_at | 14 | ATP5S    | NM_015684 | 14q22.1           |
| 206993_at   | 15 | ATP5S    | NM_015684 | 14q22.1           |
| 213995_at   | 15 | ATP5S    | AW195882  | 14q22.1           |
| 207809_s_at | 15 | ATP6AP1  | NM_001183 | Xq28              |
| 201443_s_at | 15 | ATP6AP2  | AF248966  | Xq21              |
| 201444_s_at | 15 | ATP6AP2  | NM_005765 | Xq21              |
| 212383_at   | 15 | ATP6V0A1 | AL096733  | 17q21             |
| 200078_s_at | 15 | ATP6V0B  | BC005876  | 1p32.3 /// 1p32.3 |
| 212041_at   | 15 | ATP6V0D1 | AL566172  | 16q22             |
| 200096_s_at | 15 | ATP6V0E  | AV717561  | 5q35.2            |
| 201172_x_at | 15 | ATP6V0E  | NM_003945 | 5q35.2            |
| 214149_s_at | 14 | ATP6V0E  | AI252582  | 5q35.2            |
| 214150_x_at | 15 | ATP6V0E  | AI252582  | 5q35.2            |
| 201971_s_at | 12 | ATP6V1A  | NM_001690 | 3q13.31           |
| 201089_at   | 15 | ATP6V1B2 | NM_001693 | 8p22-p21          |

|             |    |                     |           |                |
|-------------|----|---------------------|-----------|----------------|
| 202872_at   | 15 | ATP6V1C1            | AW024925  | 8q22.3         |
| 202874_s_at | 15 | ATP6V1C1            | NM_001695 | 8q22.3         |
| 208638_at   | 15 | ATP6V1C2            | BE910010  | ---            |
| 208678_at   | 15 | ATP6V1E1            | BC004443  | 22pter-q11.2   |
| 201527_at   | 15 | ATP6V1F             | NM_004231 | 7q32           |
| 208737_at   | 15 | ATP6V1G1            | BC003564  | 9q33.1         |
| 214762_at   | 15 | ATP6V1G2            | BF340635  | 6p21.3         |
| 205197_s_at | 12 | ATP7A               | BE567813  | Xq13.2-q13.3   |
| 205198_s_at | 15 | ATP7A               | NM_000052 | Xq13.2-q13.3   |
| 204624_at   | 15 | ATP7B               | NM_000053 | 13q14.2-q21    |
| 213106_at   | 15 | ATP8A1              | AI769688  | 4p14-p12       |
| 219660_s_at | 11 | ATP8A2              | NM_016529 | 13q12-13       |
| 214594_x_at | 14 | ATP8B1              | BG252666  | 18q21-q22      |
| 216873_s_at | 11 | ATP8B2              | AL137537  | 1q22           |
| 212062_at   | 13 | ATP9A               | AB014511  | 20q13.11-q13.2 |
| 213057_at   | 11 | ATPAF2              | AW118608  | ---            |
| 208836_at   | 15 | ATPB-3; FLJ29027    | U51478    | 3q22-q23       |
| 218799_at   | 15 | ATPBD1B             | NM_018066 | 1p35.3         |
| 218461_at   | 15 | ATPBD1C             | NM_016301 | 12q24.13       |
| 218671_s_at | 15 | ATPIF1              | NM_016311 | ---            |
| 36994_at    | 15 | ATPL                | M62762    | 16p13.3        |
| 210149_s_at | 15 | ATPQ; ATP5JD        | AF061735  | 17q25          |
| 212517_at   | 15 | ATRN                | AL132773  | 20p13          |
| 208859_s_at | 10 | ATRX                | AI650257  | Xq13.1-q21.1   |
| 208861_s_at | 15 | ATRX                | U72937    | Xq13.1-q21.1   |
| 209392_at   | 14 | ATX                 | L35594    | 8q24.1         |
| 210839_s_at | 15 | ATX                 | D45421    | 8q24.1         |
| 203231_s_at | 14 | ATXN1               | AW235612  | 6p23           |
| 203232_s_at | 15 | ATXN1               | NM_000332 | 6p23           |
| 208832_at   | 15 | ATXN10              | AW241832  | 22q13.31       |
| 202622_s_at | 11 | ATXN2               | NM_002973 | 12q24          |
| 205415_s_at | 10 | ATXN3               | AI888099  | 14q24.3-q32.2  |
| 205416_s_at | 15 | ATXN3               | NM_004993 | 14q24.3-q32.2  |
| 204516_at   | 13 | ATXN7               | BG390306  | 3p21.1-p12     |
| 212114_at   | 15 | ATXN7L3             | BE967207  | 12q15          |
| 205052_at   | 15 | AUH                 | NM_001698 | 9q22.31        |
| 220525_s_at | 15 | AUP1                | NM_012103 | 2p13           |
| 218580_x_at | 15 | AURKAIP1            | NM_017900 | 1p36.33        |
| 212599_at   | 15 | AUTS2               | AK025298  | 7q11.23        |
| 219366_at   | 15 | AVEN                | NM_020371 | 15q13.1        |
| 205539_at   | 11 | AVIL                | NM_006576 | 12q13.2        |
| 214331_at   | 11 | AVIL                | AI796813  | ---            |
| 218631_at   | 15 | AVPI1               | NM_021732 | 10q24.2        |
| 221613_s_at | 15 | AWP1                | AL136598  | 15q24.3        |
| 202686_s_at | 13 | AXL                 | NM_021913 | 19q13.1        |
| 40472_at    | 15 | AYTL3               | AF007155  | 15q13.2        |
| 218043_s_at | 14 | AZI2                | NM_022461 | 3p23           |
| 201772_at   | 15 | AZIN1               | NM_015878 | 8q22.3         |
| 211382_s_at | 15 | AZU-1; ECTACC       | AF220152  | 10q26          |
| 221691_x_at | 15 | B23; NPM; MGC104254 | AB042278  | 5q35 /// 5q35  |

|             |    |                            |           |               |
|-------------|----|----------------------------|-----------|---------------|
| 201891_s_at | 15 | B2M                        | NM_004048 | 15q21-q22.2   |
| 216231_s_at | 15 | B2M                        | AW188940  | 15q21-q22.2   |
| 211379_x_at | 15 | B3GALT3                    | AB050855  | 3q25          |
| 211812_s_at | 15 | B3GALT3                    | AB050856  | 3q25          |
| 210205_at   | 11 | B3GALT4                    | AB026730  | 6p21.3        |
| 203188_at   | 15 | B3GNT6                     | NM_006876 | 11q13.1       |
| 209034_at   | 15 | B4-2                       | AF279899  | 6q16.1        |
| 209413_at   | 12 | B4GALT2                    | BC002431  | 1p34-p33      |
| 210243_s_at | 15 | B4GALT3                    | AF038661  | 1q21-q23      |
| 212876_at   | 12 | B4GALT4                    | BF223021  | 3q13.3        |
| 221484_at   | 15 | B4GALT5                    | AB004550  | 20q13.1-q13.2 |
| 221485_at   | 15 | B4GALT5                    | AB004550  | 20q13.1-q13.2 |
| 53076_at    | 14 | B4GALT7                    | AI040029  | 5q35.2-q35.3  |
| 217200_x_at | 11 | B561                       | U06715    | ---           |
| 210527_x_at | 15 | bA408E5.3                  | L11645    | 13q11         |
| 217904_s_at | 15 | BACE1                      | AI653425  | 11q23.2-q23.3 |
| 217867_x_at | 15 | BACE2                      | AF178532  | 21q22.3       |
| 204194_at   | 15 | BACH1                      | NM_001186 | 21q22.11      |
| 221234_s_at | 15 | BACH2                      | NM_021813 | 6q15 /// 6q15 |
| 1861_at     | 15 | BAD                        | U66879    | 11q13.1       |
| 209364_at   | 14 | BAD                        | U66879    | 11q13.1       |
| 210649_s_at | 13 | BAF250a                    | AF231056  | 1p35.3        |
| 202387_at   | 15 | BAG1                       | NM_004323 | 9p12          |
| 211475_s_at | 15 | BAG1                       | AF116273  | 9p12          |
| 209406_at   | 15 | BAG-2; KIAA0576; dJ41711.2 | AF095192  | 6p12.3-p11.2  |
| 217911_s_at | 15 | BAG3                       | NM_004281 | 10q25.2-q26.2 |
| 202985_s_at | 13 | BAG5                       | NM_004873 | 14q32.33      |
| 209135_at   | 15 | BAH                        | AF289489  | 8q12.1        |
| 210896_s_at | 15 | BAH                        | AF306765  | 8q12.1        |
| 203051_at   | 14 | BAHD1                      | NM_014952 | 15q14         |
| 205638_at   | 12 | BAI3                       | NM_001704 | 6q12          |
| 215372_x_at | 13 | BAIAP1                     | AU146794  | ---           |
| 203304_at   | 15 | BAMBI                      | NM_012342 | 10p12.3-p11.2 |
| 219966_x_at | 15 | BANP                       | NM_017869 | 16q24         |
| 201419_at   | 12 | BAP1                       | NM_004656 | 3p21.31-p21.2 |
| 205345_at   | 15 | BARD1                      | NM_000465 | 2q34-q35      |
| 202391_at   | 15 | BASP1                      | NM_006317 | 5p15.1-p14    |
| 200041_s_at | 15 | BAT1                       | NM_004640 | 6p21.3        |
| 208132_x_at | 14 | BAT2                       | NM_004638 | 6p21.3        |
| 212081_x_at | 15 | BAT2                       | AF129756  | 6p21.3        |
| 214201_x_at | 12 | BAT2                       | AA742237  | 6p21.3        |
| 201255_x_at | 15 | BAT3                       | NM_004639 | 6p21.3        |
| 210208_x_at | 15 | BAT3                       | BC003133  | 6p21.3        |
| 213318_s_at | 15 | BAT3                       | BG028844  | 6p21.3        |
| 208478_s_at | 13 | BAX                        | NM_004324 | 19q13.3-q13.4 |
| 211833_s_at | 13 | BAX                        | U19599    | 19q13.3-q13.4 |
| 217985_s_at | 11 | BAZ1A                      | AA102574  | 14q12-q13     |
| 217986_s_at | 15 | BAZ1A                      | AA102574  | 14q12-q13     |
| 208445_s_at | 14 | BAZ1B                      | NM_023005 | 7q11.23       |
| 201353_s_at | 14 | BAZ2A                      | AI653126  | 12q24.3-qter  |



|             |    |          |           |               |
|-------------|----|----------|-----------|---------------|
| 203080_s_at | 15 | BAZ2B    | NM_013450 | 2q23-q24      |
| 211703_s_at | 15 | BBP      | AF353990  | 1p32.1        |
| 213882_at   | 14 | BBP      | AA012917  | 1p32.1        |
| 213883_s_at | 15 | BBP      | AA012917  | 1p32.1        |
| 218471_s_at | 15 | BBS1     | NM_024649 | 11q13.1       |
| 212744_at   | 14 | BBS4     | AI813772  | 15q22.3-q23   |
| 213015_at   | 13 | BBX      | BF448315  | 3q13.1        |
| 213016_at   | 15 | BBX      | AA573805  | 3q13.1        |
| 31837_at    | 10 | BC002942 | U62317    | 22q13.33      |
| 205084_at   | 14 | BCAP29   | NM_018844 | 7q22-q31      |
| 200837_at   | 15 | BCAP31   | NM_005745 | Xq28          |
| 204032_at   | 13 | BCAR3    | NM_003567 | 1p22.1        |
| 203053_at   | 15 | BCAS2    | NM_005872 | 1p21-p13.3    |
| 220488_s_at | 12 | BCAS3    | NM_017679 | 17q23         |
| 203576_at   | 15 | BCAT2    | NM_001190 | 19q13         |
| 218264_at   | 14 | BCCIP    | NM_016567 | 10q26.1       |
| 219798_s_at | 12 | BCDIN3   | NM_019606 | 7q22.1        |
| 208682_s_at | 15 | BCG1     | AF126181  | Xp11.2        |
| 205433_at   | 15 | BCHE     | NM_000055 | 3q26.1-q26.2  |
| 202331_at   | 15 | BCKDHA   | NM_000709 | 19q13.1-q13.2 |
| 210653_s_at | 11 | BCKDHB   | M55575    | 6q13-q15      |
| 202030_at   | 15 | BCKDK    | NM_005881 | 16p11.2       |
| 208712_at   | 15 | bcl-1    | M73554    | 11q13         |
| 205263_at   | 15 | BCL10    | AF082283  | 1p22          |
| 219497_s_at | 12 | BCL11A   | NM_018014 | 2p16.1        |
| 203685_at   | 15 | BCL2     | NM_000633 | 18q21.33      |
| 217955_at   | 15 | BCL2L13  | NM_015367 | 22q11         |
| 209311_at   | 15 | BCL2L2   | D87461    | 14q11.2-q12   |
| 203140_at   | 15 | BCL6     | NM_001706 | 3q27          |
| 203795_s_at | 10 | BCL7A    | NM_020993 | ---           |
| 210679_x_at | 15 | BCL7A    | BC002629  | ---           |
| 202518_at   | 15 | BCL7B    | NM_001707 | 7q11.23       |
| 219072_at   | 13 | BCL7C    | NM_004765 | 16p11         |
| 201083_s_at | 11 | BCLAF1   | AA740754  | 6q22-q23      |
| 201084_s_at | 15 | BCLAF1   | NM_014739 | 6q22-q23      |
| 216870_x_at | 15 | BCMSUN   | AF264787  | 13q14.3       |
| 219433_at   | 15 | BCOR     | NM_017745 | Xp11.4        |
| 219444_at   | 15 | BCORL1   | NM_021946 | Xq25-q26.1    |
| 210125_s_at | 15 | BCRG1    | AF044773  | 11q13.1       |
| 209735_at   | 15 | BCRP     | AF098951  | 4q22          |
| 207618_s_at | 15 | BCS1L    | NM_004328 | 2q33          |
| 212655_at   | 15 | BDG29    | AB011151  | 16q24.2       |
| 202514_at   | 15 | BDH      | AW139131  | 3q29          |
| 202515_at   | 15 | BDH      | BG251175  | 3q29          |
| 211715_s_at | 14 | BDH1     | BC005844  | 3q29 /// 3q29 |
| 208945_s_at | 15 | BECN1    | AF139131  | 17q21         |
| 208946_s_at | 15 | BECN1    | AF139131  | 17q21         |
| 203319_s_at | 15 | BERF-1   | L04282    | 3q21          |
| 202710_at   | 15 | BET1     | BC000899  | 7q21.1-q22    |
| 203511_s_at | 15 | BET3     | AF041432  | 1p34.3        |

|             |    |                        |           |                     |
|-------------|----|------------------------|-----------|---------------------|
| 216063_at   | 13 | beta globin pseudogene | N55205    | ---                 |
| 218332_at   | 15 | BEX1                   | NM_018476 | Xq21-q23            |
| 215440_s_at | 15 | BEXL1                  | AL523320  | Xq22.1-q22.3        |
| 218056_at   | 15 | BFAR                   | NM_016561 | 16p13.13            |
| 214763_at   | 13 | BFIT                   | AK023937  | 1p32.3              |
| 206956_at   | 15 | BGLAP                  | NM_000711 | 1q25-q31            |
| 201261_x_at | 15 | BGN                    | BC002416  | Xq28                |
| 213905_x_at | 15 | BGN                    | AA845258  | 18q22.3             |
| 201169_s_at | 13 | BHLHB2                 | BG326045  | 3p26                |
| 201170_s_at | 15 | BHLHB2                 | NM_003670 | 3p26                |
| 210273_at   | 12 | BHPCDH; BH-Pcdh        | AB006757  | 4p15                |
| 220580_at   | 10 | BICC1                  | NM_025044 | 10q21.3             |
| 209203_s_at | 15 | BICD2                  | BC002327  | 8q22                |
| 212702_s_at | 15 | BICD2                  | N45111    | 9q22.32             |
| 213154_s_at | 15 | BICD2                  | AI934125  | 9q22.32             |
| 204493_at   | 12 | BID                    | NM_001196 | 22q11.1             |
| 211725_s_at | 15 | BID                    | BC005884  | ---                 |
| 209091_s_at | 15 | Bif-1                  | AF263293  | 1p22                |
| 210101_x_at | 15 | Bif-1                  | AF257318  | 1p22                |
| 202955_s_at | 13 | BIG1                   | AF084520  | 8q13                |
| 216266_s_at | 15 | BIG1                   | AK025637  | 8q13                |
| 209267_s_at | 10 | BIGM103                | AB040120  | 4q22-q24            |
| 222199_s_at | 15 | BIN3                   | AK001289  | 8p21.2              |
| 211936_at   | 15 | BIP; MIF2; GRP78       | AF216292  | 9q33-q34.1          |
| 202076_at   | 15 | BIRC2                  | NM_001166 | 11q22               |
| 202095_s_at | 15 | BIRC5                  | NM_001168 | 17q25               |
| 202896_s_at | 14 | Bit                    | AB023430  | 20p13 /// 20p13     |
| 202897_at   | 15 | Bit                    | AB023430  | 20p13               |
| 218732_at   | 12 | BIT1                   | NM_016077 | 17q23.2             |
| 219657_s_at | 10 | BKLF; MGC48279         | AF285837  | 4p14                |
| 212447_at   | 15 | BKLHD1                 | AF161402  | 7p14.3              |
| 216834_at   | 14 | BL34                   | S59049    | 1q31                |
| 201032_at   | 15 | BLCAP                  | NM_006698 | 20q11.2-q12         |
| 221534_at   | 12 | Bles03; P5326          | AF073483  | 11q13.1             |
| 202179_at   | 13 | BLMH                   | NM_000386 | 17q11.2             |
| 202592_at   | 15 | BLOC1S1                | NM_001487 | 12q13-q14           |
| 221702_s_at | 15 | BLP2                   | AF353992  | 15q26.3 /// 15q26.3 |
| 203773_x_at | 15 | BLVRA                  | NM_000712 | 7p14-cen            |
| 211729_x_at | 15 | BLVRA                  | BC005902  | 7p14-cen            |
| 202201_at   | 15 | BLVRB                  | NM_000713 | 19q13.1-q13.2       |
| 219555_s_at | 11 | BM039                  | NM_018455 | 16q23.2             |
| 35617_at    | 15 | BMK1                   | U29725    | 17p11.2             |
| 205430_at   | 15 | BMP5                   | NM_021073 | 6p12.1              |
| 205431_s_at | 15 | BMP5                   | NM_021073 | 6p12.1              |
| 209590_at   | 15 | BMP7                   | AL157414  | 20q13               |
| 204832_s_at | 10 | BMPR1A                 | NM_004329 | 10q22.3             |
| 213578_at   | 15 | BMPR1A                 | AI678679  | 10q22.3             |
| 203082_at   | 15 | BMS1L                  | NM_014753 | 10q11.21            |
| 204930_s_at | 14 | BNIP1                  | NM_013979 | 5q33-q34            |
| 207829_s_at | 12 | BNIP1                  | NM_013978 | 5q33-q34            |

|             |    |                |           |               |
|-------------|----|----------------|-----------|---------------|
| 37226_at    | 15 | BNIP1          | U15172    | 5q33-q34      |
| 209308_s_at | 15 | BNIP2          | BC002461  | 15q21.3       |
| 201848_s_at | 15 | BNIP3          | U15174    | 10q26.3       |
| 201849_at   | 15 | BNIP3          | NM_004052 | 10q26.3       |
| 221478_at   | 15 | BNIP3L         | AL132665  | 8p21          |
| 221479_s_at | 15 | BNIP3L         | AL132665  | 8p21          |
| 219345_at   | 15 | BOLA1          | NM_016074 | 1p36.13-q31.3 |
| 218775_s_at | 13 | BOMB           | NM_024949 | 4q35.1        |
| 203502_at   | 15 | BPGM           | NM_001724 | 7q31-q34      |
| 205750_at   | 11 | BPHL           | NM_004332 | 6p25          |
| 209271_at   | 14 | BPTF           | AB032251  | 17q24.3       |
| 218522_s_at | 13 | BPY2IP1        | NM_018174 | 19p13.12      |
| 206044_s_at | 15 | BRAF           | NM_004333 | 7q34          |
| 213473_at   | 12 | BRAP           | AL042733  | 12q24.12      |
| 204520_x_at | 15 | BRD1           | NM_014577 | 22q13.33      |
| 215460_x_at | 13 | BRD1           | AL080149  | 22q13.33      |
| 208685_x_at | 15 | BRD2           | AA902767  | 6p21.3        |
| 208686_s_at | 15 | BRD2           | AA902767  | 6p21.3        |
| 203825_at   | 15 | BRD3           | NM_007371 | 9q34          |
| 202102_s_at | 15 | BRD4           | BF718610  | 19p13.1       |
| 202103_at   | 15 | BRD4           | AI991631  | 19p13.1       |
| 221776_s_at | 15 | BRD7           | AI885109  | 16q12         |
| 202227_s_at | 15 | BRD8           | NM_006696 | 5q31          |
| 220155_s_at | 13 | BRD9           | NM_023924 | 5p15.33       |
| 205550_s_at | 15 | BRE            | NM_004899 | 2p23.3        |
| 218955_at   | 15 | BRF2           | NM_018310 | 8p11.23       |
| 208794_s_at | 15 | BRG1           | D26156    | 19p13.2       |
| 214728_x_at | 12 | BRG1           | AK026573  | 19p13.2       |
| 202427_s_at | 15 | BRP44          | NM_015415 | 1q24          |
| 218024_at   | 15 | BRP44L         | NM_016098 | 6q27          |
| 202157_s_at | 15 | BRUNOL3        | U69546    | 10p13         |
| 218090_s_at | 15 | BRWD2          | NM_018117 | 10q26         |
| 222024_s_at | 15 | BRX            | AK022014  | 15q24-q25     |
| 208908_s_at | 15 | BS-17; MGC9402 | AF327443  | 5q15-q21      |
| 32837_at    | 15 | BSCL           | U56418    | 9q34.3        |
| 208906_at   | 12 | BSCL2          | BC004911  | 11q12-q13.5   |
| 218004_at   | 15 | BSDC1          | NM_018045 | 1p34.3        |
| 210993_s_at | 15 | BSP1           | U54826    | 4q28          |
| 211256_x_at | 10 | BT2.1          | U90142    | 6p22.1        |
| 217945_at   | 15 | BTBD1          | NM_025238 | 15q24         |
| 212993_at   | 15 | BTBD14A        | AA114166  | 9q34.3        |
| 202946_s_at | 15 | BTBD3          | NM_014962 | 20p12.1       |
| 214499_s_at | 12 | BTF            | AF249273  | 6q22-q23      |
| 221540_x_at | 13 | BTF2           | AF078847  | 5q12.2-q13.3  |
| 208517_x_at | 15 | BTF3           | NM_001207 | 5q13.3        |
| 214800_x_at | 15 | BTF3           | R83000    | 5q13.3        |
| 38241_at    | 12 | BTF3           | U90548    | 6p21.3        |
| 200920_s_at | 15 | BTG1           | AL535380  | 12q22         |
| 200921_s_at | 15 | BTG1           | NM_001731 | 12q22         |
| 201236_s_at | 14 | BTG2           | BG339064  | 1q32          |

|             |    |                     |           |                 |
|-------------|----|---------------------|-----------|-----------------|
| 205548_s_at | 15 | BTG3                | NM_006806 | 21q21.1-q21.2   |
| 213134_x_at | 15 | BTG3                | AI765445  | 21q21.1-q21.2   |
| 210970_s_at | 15 | BTKI                | AF235049  | 6q14.3          |
| 203944_x_at | 15 | BTN2A1              | NM_007049 | 6p22.1          |
| 215493_x_at | 15 | BTN2A2              | AL121936  | 6p22.1          |
| 209846_s_at | 12 | BTN3A2              | BC002832  | 6p22.1          |
| 204820_s_at | 14 | BTN3A3              | NM_006994 | 6p21.3          |
| 217207_s_at | 11 | BTNLR               | AK025267  | 5q35.3          |
| 209642_at   | 14 | BUB1A; BUB1L; hBUB1 | AF043294  | 2q14            |
| 203755_at   | 15 | BUB1B               | NM_001211 | 15q15           |
| 201456_s_at | 15 | BUB3                | NM_004725 | 10q26           |
| 201457_x_at | 15 | BUB3                | NM_004725 | 10q26           |
| 201458_s_at | 15 | BUB3                | NM_004725 | 10q26           |
| 209974_s_at | 15 | BUB3                | AF047473  | 10q26           |
| 218462_at   | 15 | BXDC5               | NM_025065 | 1p22.3          |
| 205839_s_at | 11 | BZRAP1              | NM_004758 | 17q22-q23       |
| 202096_s_at | 15 | BZRP                | NM_000714 | 22q13.31        |
| 200776_s_at | 15 | BZW1                | AL518328  | ---             |
| 200777_s_at | 15 | BZW1                | NM_014670 | 2q33            |
| 217809_at   | 15 | BZW2                | NM_014038 | 7p21.2          |
| 209183_s_at | 14 | C10orf10            | AL136653  | 10q11.21        |
| 217905_at   | 13 | C10orf119           | NM_024834 | 10q26.13        |
| 218331_s_at | 15 | C10orf18            | NM_017782 | 10p15.1         |
| 212500_at   | 15 | C10orf22            | AL049319  | 10q21.3         |
| 212502_at   | 15 | C10orf22            | AV713053  | 10q21.3         |
| 212771_at   | 15 | C10orf38            | AU150943  | 10p13           |
| 212419_at   | 15 | C10orf56            | AA131324  | 10q23.1         |
| 212423_at   | 15 | C10orf56            | AK024784  | 10q23.1         |
| 203481_at   | 15 | C10orf6             | AI655902  | 10q24.32        |
| 203482_at   | 14 | C10orf6             | AL133215  | 10q24.32        |
| 212121_at   | 15 | C10orf61            | BE962354  | 10q24.1         |
| 201725_at   | 15 | C10orf7             | NM_006023 | 10p13           |
| 55662_at    | 15 | C10orf76            | H27225    | 10q24.32        |
| 211376_s_at | 15 | C10orf86            | BC005212  | 10q26.13        |
| 219067_s_at | 15 | C10orf86            | NM_017615 | 10q26.13        |
| 219240_s_at | 12 | C10orf88            | NM_024942 | 10q26.13        |
| 218297_at   | 14 | C10orf97            | NM_024948 | 10p13           |
| 218213_s_at | 15 | C11orf10            | NM_014206 | 11q12-q13.1     |
| 217969_at   | 15 | C11orf2             | NM_013265 | 11q13           |
| 220560_at   | 13 | C11orf21            | NM_014144 | 11p15.5         |
| 52164_at    | 15 | C11orf24            | AA065185  | 11q13           |
| 43934_at    | 10 | C11ORF4             | AA479495  | 11cen-q22.3     |
| 202409_at   | 15 | C11orf43            | X07868    | ---             |
| 215692_s_at | 10 | C11orf8             | BE645386  | 11p13           |
| 218220_at   | 15 | C12orf10            | NM_021640 | 12q13           |
| 221652_s_at | 14 | C12orf11            | AF274950  | 12p12.1         |
| 221260_s_at | 15 | C12orf22            | NM_030809 | 12q13.11-q13.12 |
| 218374_s_at | 15 | C12orf4             | NM_020374 | 12p13.3         |
| 219099_at   | 13 | C12orf5             | NM_020375 | 12p13.3         |
| 218422_s_at | 14 | C13orf10            | T79937    | 13q22.2         |

|             |    |           |           |                     |
|-------------|----|-----------|-----------|---------------------|
| 217769_s_at | 15 | C13orf12  | BC003390  | 13q12.3             |
| 219303_at   | 15 | C13orf7   | NM_024546 | 13q22.2             |
| 202562_s_at | 15 | C14orf1   | AL136658  | 14q24.3             |
| 218852_at   | 15 | C14orf10  | NM_017917 | 14q13.2             |
| 219757_s_at | 15 | C14orf101 | NM_017799 | 14q22.3             |
| 219164_s_at | 12 | C14orf103 | H96715    | 14q32.31            |
| 219166_at   | 14 | C14orf104 | NM_018139 | 14q21.3             |
| 218139_s_at | 15 | C14orf108 | NM_018229 | 14q22.3             |
| 213246_at   | 15 | C14orf109 | AI346504  | 14q32.13            |
| 202623_at   | 15 | C14orf11  | NM_018453 | 14q13.1             |
| 217645_at   | 15 | C14orf112 | AW088547  | 14q24.1             |
| 218363_at   | 15 | C14orf114 | NM_018199 | 14q24.1             |
| 213794_s_at | 15 | C14orf120 | AI269117  | 14q11.2             |
| 219203_at   | 12 | C14orf122 | NM_016049 | 14q11.2             |
| 212355_at   | 14 | C14orf124 | AI075450  | 14q11.2             |
| 213398_s_at | 15 | C14orf124 | AI347090  | 14q11.2             |
| 218108_at   | 15 | C14orf130 | NM_018108 | 14q32.13            |
| 219086_at   | 14 | C14orf131 | NM_018335 | 14q32.33            |
| 218820_at   | 12 | C14orf132 | NM_020215 | 14q32.2             |
| 218431_at   | 15 | C14orf133 | NM_022067 | 14q24.3-q31         |
| 219972_s_at | 15 | C14orf135 | NM_022495 | 14q23.1             |
| 218940_at   | 15 | C14orf138 | NM_024558 | 14q22.1             |
| 219563_at   | 12 | C14orf139 | NM_024633 | 14q32.2             |
| 214264_s_at | 15 | C14orf143 | AI656610  | 14q32.11            |
| 212460_at   | 15 | C14orf147 | BE738425  | 14q13.1             |
| 213508_at   | 15 | C14orf147 | AA142942  | 14q13.1             |
| 212465_at   | 15 | C14orf154 | AA524500  | 14q32.32            |
| 221434_s_at | 15 | C14orf156 | NM_031210 | 14q24.3 /// 14q24.3 |
| 218298_s_at | 15 | C14orf159 | NM_024952 | 14q32.12            |
| 215548_s_at | 15 | C14orf163 | AB020724  | 14q12               |
| 217768_at   | 15 | C14orf166 | NM_016039 | 14q22.1             |
| 219526_at   | 14 | C14orf169 | NM_024644 | 14q24.2             |
| 214659_x_at | 13 | C14orf170 | AC007956  | 14q24.3             |
| 52741_at    | 12 | C14orf172 | AI962879  | 14q32.33            |
| 218144_s_at | 12 | C14orf173 | NM_022489 | 14q32.33            |
| 202279_at   | 15 | C14orf2   | NM_004894 | 14q32.33            |
| 212643_at   | 15 | C14orf32  | AI671747  | 14q22.2             |
| 212644_s_at | 15 | C14orf32  | AI671747  | 14q22.2             |
| 220173_at   | 15 | C14orf45  | NM_025057 | 14q24.2             |
| 221932_s_at | 15 | C14orf87  | AA133341  | 14q32.2             |
| 201683_x_at | 12 | C14orf92  | BE783632  | 14q11.2             |
| 201684_s_at | 15 | C14orf92  | BF001668  | 14q11.2             |
| 201685_s_at | 14 | C14orf92  | NM_014828 | 14q11.2             |
| 217448_s_at | 11 | C14orf92  | AL117508  | 4q26                |
| 219009_at   | 11 | C14orf93  | NM_021944 | 14q11.2             |
| 218383_at   | 15 | C14orf94  | NM_017815 | 14q11.2             |
| 221688_s_at | 15 | C15orf12  | AL136913  | 15q24               |
| 217898_at   | 15 | C15orf24  | NM_020154 | 15q13.2             |
| 218791_s_at | 15 | C15orf29  | NM_024713 | 15q13.2             |
| 204495_s_at | 13 | C15orf39  | NM_015492 | 15q23               |

|             |    |                   |           |                |
|-------------|----|-------------------|-----------|----------------|
| 221064_s_at | 10 | C16orf28          | NM_023076 | 16p13.3        |
| 219315_s_at | 15 | C16orf30          | NM_024600 | 16p13.3        |
| 218493_at   | 15 | C16orf33          | NM_024571 | 16p13.3        |
| 212109_at   | 15 | C16orf34          | AI590869  | 16p13.3        |
| 212115_at   | 15 | C16orf34          | AK023154  | 16p13.3        |
| 214273_x_at | 15 | C16orf35          | AV704353  | 16p13.3        |
| 212736_at   | 15 | C16orf45          | BE299456  | 16p13.13       |
| 218183_at   | 15 | C16orf5           | NM_013399 | 16p13.3        |
| 204676_at   | 15 | C16orf51          | NM_015421 | 16p13.13-p12.3 |
| 218300_at   | 12 | C16orf53          | NM_024516 | 16p12.1        |
| 205781_at   | 15 | C16orf7           | NM_004913 | 16q24          |
| 218715_at   | 15 | C17orf40          | NM_018428 | 17q11.2        |
| 219146_at   | 14 | C17orf42          | NM_024683 | ---            |
| 218514_at   | 15 | C17orf71          | NM_018149 | 17q23.2        |
| 207996_s_at | 13 | C18orf1           | NM_004338 | 18p11.2        |
| 209573_s_at | 10 | C18orf1           | AF009424  | 18p11.2        |
| 209574_s_at | 15 | C18orf1           | AI349506  | 18p11.2        |
| 212055_at   | 15 | C18orf10          | BF689173  | 18q12.2        |
| 213616_at   | 15 | C18orf10          | BF063896  | 18q12.2        |
| 213617_s_at | 13 | C18orf10          | BF063896  | 18q12.2        |
| 219419_at   | 15 | C18orf22          | NM_024805 | 18q23          |
| 221190_s_at | 15 | C18orf8           | NM_013326 | 18q11.2        |
| 52285_f_at  | 13 | C18orf9           | AW002970  | 18p11.21       |
| 221739_at   | 15 | C19orf10          | AL524093  | 19p13.3        |
| 212131_at   | 15 | C19orf13          | BG054966  | 19q13.12       |
| 222099_s_at | 15 | C19orf13          | AW593859  | 19q13.12       |
| 214173_x_at | 15 | C19orf2           | AW514900  | 19q12          |
| 222266_at   | 15 | C19orf2           | BF796940  | 19q12          |
| 55705_at    | 15 | C19orf22          | W07773    | 19p13.3        |
| 221587_s_at | 12 | C19orf24          | BC000890  | 19p13.3        |
| 221267_s_at | 15 | C19orf27          | NM_031213 | 19p13.3        |
| 213390_at   | 13 | C19orf7           | AB028987  | 19q13.33       |
| 200056_s_at | 15 | C1D               | NM_006333 | 2p13-p12       |
| 219439_at   | 15 | C1GALT1           | NM_020156 | 7p14-p13       |
| 219283_at   | 15 | C1GALT1C1         | NM_014158 | Xq25           |
| 213938_at   | 10 | C1orf1            | Z38645    | 3p21.31        |
| 220235_s_at | 12 | C1orf103          | NM_018372 | 1p13.2         |
| 204699_s_at | 13 | C1orf107          | NM_014388 | 1q32.2         |
| 204700_x_at | 15 | C1orf107          | NM_014388 | 1q32.2         |
| 217893_s_at | 14 | C1orf108          | NM_024595 | 1p34.2         |
| 206721_at   | 12 | C1orf114          | NM_021179 | 1q24           |
| 218546_at   | 15 | C1orf115          | NM_024709 | 1q42.11        |
| 218165_at   | 15 | C1orf149          | NM_022756 | 1p35.3-p33     |
| 201794_s_at | 15 | C1orf16           | NM_014837 | 1q25           |
| 219988_s_at | 15 | C1orf164          | NM_018150 | 1p34.1         |
| 219670_at   | 15 | C1orf165          | NM_024603 | 1p33           |
| 209883_at   | 15 | C1orf17; KIAA0584 | AF288389  | 1q25           |
| 218932_at   | 15 | C1orf181          | NM_017953 | 1p22.3         |
| 203550_s_at | 14 | C1orf2            | NM_006589 | 1q21           |
| 220342_x_at | 13 | C1orf22           | NM_017992 | 1q24-q25       |

|             |    |           |           |                   |
|-------------|----|-----------|-----------|-------------------|
| 220926_s_at | 13 | C1orf22   | NM_025191 | 1q24-q25          |
| 220992_s_at | 15 | C1orf25   | NM_030934 | 1q25.2 /// 1q25.2 |
| 218721_s_at | 15 | C1orf27   | NM_017847 | 1q25              |
| 219063_at   | 12 | C1orf35   | NM_024319 | 1q42.13           |
| 212164_at   | 13 | C1orf37   | AL522296  | 1q32.1            |
| 212165_at   | 15 | C1orf37   | AF070537  | 1q32.1            |
| 207571_x_at | 11 | C1orf38   | NM_004848 | 1p35.3            |
| 203960_s_at | 15 | C1orf41   | NM_016126 | 1p32.1-p33        |
| 215691_x_at | 15 | C1orf41   | AV702994  | ---               |
| 219406_at   | 15 | C1orf50   | NM_024097 | 1p34.1            |
| 219506_at   | 15 | C1orf54   | NM_024579 | 1q21.3            |
| 202809_s_at | 15 | C1orf60   | NM_023015 | 1q22              |
| 202559_x_at | 15 | C1orf77   | NM_015607 | 1q22              |
| 202560_s_at | 15 | C1orf77   | NM_015607 | 1q22              |
| 220134_x_at | 15 | C1orf78   | NM_018166 | 1p34.3            |
| 221710_x_at | 15 | C1orf78   | BC006241  | 1p34.3            |
| 220199_s_at | 15 | C1orf80   | NM_022831 | 1q42.12           |
| 203429_s_at | 15 | C1orf9    | NM_016227 | 1q24              |
| 218232_at   | 14 | C1QA      | NM_015991 | 1p36.3-p34.1      |
| 202953_at   | 13 | C1QB      | NM_000491 | 1p36.3-p34.1      |
| 208910_s_at | 15 | C1QBP     | L04636    | 17p13.3           |
| 214214_s_at | 15 | C1QBP     | AU151801  | 17p13.3           |
| 218456_at   | 15 | C1QDC1    | NM_023925 | 12p11             |
| 205575_at   | 11 | C1QL1     | NM_006688 | 17q21             |
| 202877_s_at | 13 | C1QR1     | NM_012072 | 20p11.22          |
| 202878_s_at | 15 | C1QR1     | NM_012072 | 20p11.22          |
| 220975_s_at | 13 | C1QTNF1   | NM_030968 | 17q25.3           |
| 220988_s_at | 15 | C1QTNF3   | NM_030945 | 5p13-p12          |
| 212067_s_at | 15 | C1R       | AL573058  | ---               |
| 208747_s_at | 15 | C1S       | M18767    | 12p13             |
| 218448_at   | 15 | C20orf11  | NM_017896 | 20q13.33          |
| 221954_at   | 15 | C20orf111 | AA160474  | 20q13.11          |
| 218159_at   | 14 | C20orf116 | NM_023935 | 20p13             |
| 78047_s_at  | 12 | C20orf127 | AW001777  | 20q11.2           |
| 218010_x_at | 15 | C20orf149 | NM_024299 | 20q13.33          |
| 219512_at   | 13 | C20orf172 | NM_024918 | 20q11.23          |
| 207713_s_at | 14 | C20orf18  | NM_006462 | 20p13             |
| 221827_at   | 15 | C20orf18  | BE788439  | 20p13             |
| 218586_at   | 15 | C20orf20  | NM_018270 | 20q13.33          |
| 221741_s_at | 15 | C20orf21  | AL096828  | 20q13.33          |
| 219570_at   | 12 | C20orf23  | NM_024704 | 20p11.23          |
| 217835_x_at | 15 | C20orf24  | NM_018840 | 20q11.23          |
| 50314_i_at  | 14 | C20orf27  | AI761506  | 20p13             |
| 219706_at   | 12 | C20orf29  | NM_018347 | 20p13             |
| 220477_s_at | 15 | C20orf30  | NM_014145 | 20p13             |
| 218094_s_at | 15 | C20orf35  | NM_018478 | 20q13.12          |
| 219310_at   | 15 | C20orf39  | NM_024893 | 20p11.21          |
| 218089_at   | 12 | C20orf4   | NM_015511 | 20pter-q12        |
| 217737_x_at | 15 | C20orf43  | NM_016407 | 20q13.31          |
| 217935_s_at | 14 | C20orf44  | NM_018244 | 20q11.23          |

|             |    |                          |           |               |
|-------------|----|--------------------------|-----------|---------------|
| 217851_s_at | 15 | C20orf45                 | NM_016045 | 20q13.32      |
| 218859_s_at | 15 | C20orf6                  | NM_016649 | 20p12.1       |
| 89948_at    | 14 | C20orf67                 | AI743331  | 20q13.12      |
| 214812_s_at | 14 | C21orf106                | D80006    | 21q22.3       |
| 215529_x_at | 12 | C21orf106                | AI590053  | 21q22.3       |
| 214820_at   | 12 | C21orf107                | AJ002572  | 21q22.2       |
| 212996_s_at | 11 | C21orf108                | AI803485  | 21q22.11      |
| 220311_at   | 12 | C21orf127                | NM_013240 | 21q21.3       |
| 212875_s_at | 11 | C21orf25                 | AP001745  | 21q22.3       |
| 213989_x_at | 10 | C21orf27                 | AB004853  | 21q22.13      |
| 202217_at   | 15 | C21orf33                 | NM_004649 | 21q22.3       |
| 219004_s_at | 15 | C21orf45                 | NM_018944 | 21q22.11      |
| 218123_at   | 15 | C21orf59                 | NM_017835 | 21q22.1       |
| 218515_at   | 15 | C21orf66                 | NM_016631 | 21q21.3       |
| 221158_at   | 15 | C21orf66                 | NM_013329 | 21q21.3       |
| 220941_s_at | 10 | C21orf91                 | NM_017447 | 21q21.1       |
| 209418_s_at | 15 | C22orf19                 | BC003615  | 22q12         |
| 204402_at   | 15 | C22orf3                  | NM_012265 | 22q12.1-q12.2 |
| 33778_at    | 15 | C22orf4; HSC79E021       | AL096779  | 22q13.3       |
| 202027_at   | 15 | C22orf5                  | NM_012264 | 22q12         |
| 219629_at   | 11 | C22orf8                  | NM_017911 | 22q13         |
| 212421_at   | 13 | C22orf9                  | AW468871  | 22q13.31      |
| 217118_s_at | 10 | C22orf9                  | AK025608  | 22q13.31      |
| 209233_at   | 15 | C2f                      | U72514    | 12p13         |
| 214823_at   | 15 | C2H2 zinc finger protein | AF033199  | ---           |
| 218037_at   | 15 | C2orf17                  | NM_024293 | 2q36.1        |
| 221983_at   | 14 | C2orf17                  | AL040896  | 2q36.1        |
| 221984_s_at | 15 | C2orf17                  | AL040896  | 2q36.1        |
| 222129_at   | 11 | C2orf17                  | AK026155  | 2q36.1        |
| 204364_s_at | 15 | C2orf23                  | BE535746  | 2p11.2        |
| 204365_s_at | 15 | C2orf23                  | NM_022912 | 2p11.2        |
| 200070_at   | 15 | C2orf24                  | BC001393  | 2q36.1        |
| 217883_at   | 15 | C2orf25                  | NM_015702 | 2q23.3        |
| 219496_at   | 13 | C2orf26                  | NM_023016 | 2q13          |
| 219329_s_at | 15 | C2orf28                  | NM_016085 | 2p23.3        |
| 216305_s_at | 15 | C2orf3                   | AC005034  | 2p11.2-p11.1  |
| 219137_s_at | 15 | C2orf33                  | NM_020194 | 2q36.3        |
| 219065_s_at | 15 | C2orf4                   | NM_015955 | 2p23.2        |
| 217767_at   | 15 | C3                       | NM_000064 | 19p13.3-p13.2 |
| 219288_at   | 15 | C3orf14                  | NM_020685 | 3p21.1        |
| 219114_at   | 15 | C3orf18                  | NM_016210 | 3p21.3        |
| 220942_x_at | 15 | C3orf28                  | NM_014367 | 3q21.1        |
| 208925_at   | 15 | C3orf4                   | AF161522  | 3p11-q11      |
| 214428_x_at | 14 | C4A                      | K02403    | 6p21.3        |
| 208451_s_at | 10 | C4B                      | NM_000592 | 6p21.3        |
| 210054_at   | 15 | C4orf15                  | BC003648  | 4p16.3        |
| 219023_at   | 14 | C4orf16                  | NM_018569 | 4q26          |
| 203600_s_at | 13 | C4orf8                   | NM_003704 | 4p16.3        |
| 214661_s_at | 15 | C4orf9                   | R06783    | 4p16.3        |
| 201309_x_at | 15 | C5orf13                  | NM_004772 | 5q22.2        |



|             |    |             |           |                   |
|-------------|----|-------------|-----------|-------------------|
| 201310_s_at | 15 | C5orf13     | NM_004772 | 5q22.2            |
| 222344_at   | 13 | C5orf13     | AW972765  | 5q22.2            |
| 220495_s_at | 15 | C5orf14     | NM_024715 | 5q31.2            |
| 203024_s_at | 15 | C5orf15     | NM_020199 | 5q31.1            |
| 208872_s_at | 15 | C5orf18     | AA814140  | 5q22-q23          |
| 208873_s_at | 15 | C5orf18     | BC000232  | 5q22-q23          |
| 218588_s_at | 15 | C5orf3      | NM_018691 | 5q31-q33          |
| 220751_s_at | 10 | C5orf4      | NM_016348 | 5q31-q32          |
| 48030_i_at  | 12 | C5orf4      | H93077    | 5q31-q32          |
| 48031_r_at  | 14 | C5orf4      | H93077    | 5q31-q32          |
| 218518_at   | 15 | C5orf5      | NM_016603 | 5q31              |
| 220088_at   | 10 | C5R1        | NM_001736 | 19q13.3-q13.4     |
| 216521_s_at | 10 | c6.1A-TCRC  | S72931    | ---               |
| 205457_at   | 11 | C6orf106    | NM_024294 | 6p21.31           |
| 217925_s_at | 14 | C6orf106    | AL523965  | 6p21.31           |
| 212176_at   | 15 | C6orf111    | AA902326  | 6q16.3            |
| 212177_at   | 15 | C6orf111    | AW081113  | 6q16.3            |
| 212179_at   | 15 | C6orf111    | AW081113  | 6q16.3            |
| 213322_at   | 15 | C6orf130    | AL031778  | 6p21.1            |
| 212760_at   | 15 | C6orf133    | AB002347  | 6p21.1            |
| 218874_s_at | 11 | C6orf134    | NM_024909 | 6p21.32           |
| 219294_at   | 10 | C6orf139    | NM_018132 | 6p12.3            |
| 212923_s_at | 15 | C6orf145    | AK024828  | 6p25.1            |
| 218561_s_at | 15 | C6orf149    | NM_020408 | 6p25.1            |
| 213312_at   | 15 | C6orf162    | NM_020425 | 6q15-q16.1        |
| 213314_at   | 15 | C6orf162    | NM_020425 | 6q15-q16.1        |
| 42361_g_at  | 11 | C6orf18     | AI588986  | 6p21.3            |
| 219307_at   | 15 | C6orf210    | NM_020381 | 6q21              |
| 218195_at   | 15 | C6orf211    | NM_024573 | 6q25.1            |
| 206707_x_at | 14 | C6orf32     | NM_015864 | 6p22.3-p21.32     |
| 209829_at   | 15 | C6orf32     | AB002384  | 6p22.3-p21.32     |
| 220755_s_at | 15 | C6orf48     | NM_016947 | 6p21.3            |
| 218233_s_at | 15 | C6orf49     | NM_017601 | 6p21.31           |
| 208809_s_at | 15 | C6orf62     | AL136632  | 6p22.1            |
| 213872_at   | 14 | C6orf62     | BE465032  | 6p22.1            |
| 219006_at   | 15 | C6orf66     | NM_014165 | 6q16.3            |
| 215207_x_at | 13 | C6orf68     | BF695847  | ---               |
| 218877_s_at | 15 | C6orf75     | NM_021820 | 6q11.1-q22.33     |
| 220094_s_at | 15 | C6orf79     | NM_022102 | 6p24.3-p23        |
| 209479_at   | 15 | C6orf80     | BC000758  | 6q23.1-q24.1      |
| 206006_s_at | 11 | C6orf84     | NM_014895 | 6q15              |
| 220329_s_at | 15 | C6orf96     | NM_017909 | 6q25.1            |
| 32094_at    | 15 | C6ST; C6ST1 | AB017915  | 10q22.2           |
| 202992_at   | 15 | C7          | NM_000587 | 5p13              |
| 204215_at   | 15 | C7orf23     | NM_024315 | 7q21.1-q21.2      |
| 47083_at    | 12 | C7orf26     | AI280108  | 7p22.1            |
| 201973_s_at | 15 | C7orf28B    | AL550875  | ---               |
| 213587_s_at | 15 | C7orf32     | AI884867  | 7q36.1            |
| 221542_s_at | 14 | C8orf2      | AL442077  | 8p11.2            |
| 221543_s_at | 15 | C8orf2      | AL442077  | 8p11.2 /// 8p11.2 |

|             |    |                           |           |               |
|-------------|----|---------------------------|-----------|---------------|
| 218777_at   | 11 | C8orf20                   | NM_025232 | 8p21.3        |
| 219071_x_at | 15 | C8orf30A                  | NM_016458 | 8q24.3        |
| 219060_at   | 15 | C8orf32                   | NM_018024 | 8q24.13       |
| 218187_s_at | 15 | C8orf33                   | NM_023080 | 8q24.3        |
| 218541_s_at | 15 | C8orf4                    | NM_020130 | 8p11.2        |
| 219124_at   | 12 | C8orf41                   | NM_025115 | 8p12          |
| 220216_at   | 10 | C8orf44                   | NM_019607 | 8q13.1        |
| 218905_at   | 15 | C8orf52                   | NM_017864 | 8q22.1        |
| 205308_at   | 15 | C8orf70                   | NM_016010 | 8q21.11       |
| 200767_s_at | 12 | C9orf10                   | NM_014612 | 9q22.32       |
| 200774_at   | 15 | C9orf10                   | BE963765  | 9q22.32       |
| 213386_at   | 15 | C9orf125                  | AV726900  | ---           |
| 204480_s_at | 15 | C9orf16                   | NM_024112 | 9q34.1        |
| 41047_at    | 15 | C9orf16                   | AI885170  | 9q34.1        |
| 212848_s_at | 15 | C9orf3                    | BG036668  | 9q22.33       |
| 218992_at   | 15 | C9orf46                   | NM_018465 | 9p24.1        |
| 205684_s_at | 14 | C9orf55                   | NM_017925 | 9p21.3        |
| 218998_at   | 15 | C9orf6                    | NM_017832 | 9q32          |
| 61874_at    | 15 | C9orf7                    | AL042496  | 9q34          |
| 208101_s_at | 15 | C9orf74                   | NM_030914 | 9q34.13       |
| 218979_at   | 14 | C9orf76                   | NM_024945 | 9q22.1        |
| 218116_at   | 15 | C9orf78                   | NM_016520 | 9q34.2        |
| 219276_x_at | 15 | C9orf82                   | NM_024828 | 9p21.1        |
| 220050_at   | 13 | C9orf9                    | NM_018956 | 9q34          |
| 221865_at   | 13 | C9orf91                   | BF969986  | 9q33.1        |
| 219147_s_at | 15 | C9orf95                   | NM_017881 | 9q21.31       |
| 219464_at   | 15 | CA14                      | NM_012113 | 1q21          |
| 209301_at   | 15 | CA2                       | M36532    | 8q22          |
| 206209_s_at | 15 | CA4                       | NM_000717 | 17q23         |
| 217873_at   | 15 | CAB39                     | NM_016289 | 2q37.1        |
| 221972_s_at | 15 | Cab45                     | AL571362  | 1p36.33       |
| 218168_s_at | 14 | CABC1                     | NM_020247 | 1q42.13       |
| 202624_s_at | 13 | CABIN1                    | NM_012295 | 22q11.23      |
| 37652_at    | 14 | CABIN1                    | AB002328  | 22q11.23      |
| 214933_at   | 13 | CACNA1A                   | AA769818  | 19p13.2-p13.1 |
| 204811_s_at | 13 | CACNA2D2                  | NM_006030 | 3p21.3        |
| 207776_s_at | 15 | CACNB2                    | NM_000724 | 10p12         |
| 213714_at   | 15 | CACNB2                    | AI040163  | 10p12         |
| 211592_s_at | 15 | CACNL1A1                  | L29536    | 12p13.3       |
| 34726_at    | 15 | CACNLB3                   | U07139    | 12q13         |
| 211761_s_at | 15 | CACYBP                    | BC005975  | 1q24-q25      |
| 219572_at   | 15 | CADPS2                    | NM_017954 | ---           |
| 208779_x_at | 15 | CAK                       | L20817    | 6p21.3        |
| 1007_s_at   | 15 | CAK                       | U48705    | ---           |
| 210749_x_at | 15 | CAK                       | L11315    | 6p21.3        |
| 211297_s_at | 11 | CAK1                      | L20320    | 5q12.1        |
| 216903_s_at | 15 | CALC                      | AK022697  | 10q22.2       |
| 32541_at    | 15 | CaM-PrP catalytic subunit | S46622    | 8p21.2        |
| 209002_s_at | 15 | CALCOCO1                  | BC003177  | 12q13.13      |
| 206331_at   | 15 | CALCRL                    | NM_005795 | 2q32.2        |

|             |    |                  |           |               |
|-------------|----|------------------|-----------|---------------|
| 201616_s_at | 15 | CALD1            | AL577531  | 7q33          |
| 201617_x_at | 15 | CALD1            | AI685060  | 7q33          |
| 205525_at   | 15 | CALD1            | NM_018495 | 7q33 /// 7q33 |
| 212077_at   | 15 | CALD1            | AL583520  | 7q33          |
| 202162_s_at | 14 | CALIF            | AF180476  | 5q31-q33      |
| 202163_s_at | 15 | CALIF            | AF180476  | 5q31-q33      |
| 202164_s_at | 15 | CALIF            | AF180476  | 5q31-q33      |
| 200655_s_at | 15 | CALM1            | NM_006888 | 14q24-q31     |
| 209563_x_at | 15 | CALM1            | BC000454  | 14q24-q31     |
| 211984_at   | 15 | CALM1            | AI653730  | 14q24-q31     |
| 211985_s_at | 15 | CALM1            | AI653730  | 14q24-q31     |
| 213688_at   | 12 | CALM1            | N25325    | 14q24-q31     |
| 207243_s_at | 15 | CALM2            | NM_001743 | 2p21          |
| 200622_x_at | 15 | CALM3            | AV685208  | 19q13.2-q13.3 |
| 200623_s_at | 15 | CALM3            | NM_005184 | 19q13.2-q13.3 |
| 209817_at   | 14 | CALNB; CALNA2    | M29550    | 10q21-q22     |
| 200935_at   | 10 | CALR             | NM_004343 | 19p13.3-p13.2 |
| 212952_at   | 15 | CALR             | AA910371  | 19p13.3-p13.2 |
| 212953_x_at | 14 | CALR             | BE251303  | 19p13.3-p13.2 |
| 214315_x_at | 15 | CALR             | AI348935  | 19p13.3-p13.2 |
| 214316_x_at | 14 | CALR             | AI378706  | 19p13.3-p13.2 |
| 200755_s_at | 15 | CALU             | BF939365  | 7q32          |
| 200757_s_at | 15 | CALU             | NM_001219 | 7q32          |
| 214845_s_at | 14 | CALU             | AF257659  | 7q32          |
| 216713_at   | 12 | CAM; CCM1        | AL049325  | ---           |
| 209956_s_at | 15 | CAM2             | U23460    | 22q12         |
| 210404_x_at | 11 | CAM2             | AF078803  | 22q12         |
| 200653_s_at | 15 | CAMI             | M27319    | 14q24-q31     |
| 204392_at   | 14 | CAMK1            | NM_003656 | 3p25.3        |
| 208095_s_at | 15 | CAMK2G           | NM_001222 | 10q22         |
| 212669_at   | 13 | CAMK2G           | AI093569  | 10q22         |
| 212757_s_at | 15 | CAMK2G           | BF111268  | 10q22         |
| 218309_at   | 15 | CAMK2N1          | NM_018584 | 1p36.13       |
| 213812_s_at | 13 | CAMKK            | AK024748  | 12q24.2       |
| 212252_at   | 13 | CAMKK2           | AA181179  | 12q24.2       |
| 203538_at   | 15 | CAMLG            | NM_001745 | 5q23          |
| 212710_at   | 14 | CAMSAP1          | AL043774  | 9q34.3        |
| 212711_at   | 15 | CAMSAP1          | AA019977  | 9q34.3        |
| 212712_at   | 15 | CAMSAP1          | AL043774  | 9q34.3        |
| 212948_at   | 15 | CAMTA2           | AB020716  | 17p13.3       |
| 207483_s_at | 15 | CAND1            | NM_018448 | 12q14         |
| 208683_at   | 15 | CANP             | M23254    | 1q41-q42      |
| 46323_at    | 15 | CANT1            | AL120741  | 17q25.3       |
| 200068_s_at | 15 | CANX             | AI761759  | 5q35          |
| 208852_s_at | 15 | CANX             | AI761759  | 5q35          |
| 200625_s_at | 15 | CAP1             | NM_006367 | 1p34.2        |
| 213798_s_at | 15 | CAP1             | AA806142  | 1p34.2        |
| 210844_x_at | 15 | CAP102; FLJ36832 | D14705    | 5q31          |
| 212551_at   | 15 | CAP2             | NM_006366 | 6p22.3        |
| 212554_at   | 15 | CAP2             | N90755    | 6p22.3        |

|             |    |              |           |                 |
|-------------|----|--------------|-----------|-----------------|
| 204373_s_at | 15 | CAP350       | NM_014810 | 1p36.13-q41     |
| 213165_at   | 15 | CAP350       | AI041204  | 1p36.13-q41     |
| 37012_at    | 15 | CAPB         | U03271    | 1p36.1          |
| 215623_x_at | 11 | CAPC; hCAP-C | AK002200  | 3q26.1          |
| 201850_at   | 14 | CAPG         | NM_001747 | 2cen-q24        |
| 200752_s_at | 11 | CAPN1        | NM_005186 | 11q13           |
| 210944_s_at | 15 | CAPN3        | BC003169  | 15q15.1-q21.1   |
| 203356_at   | 15 | CAPN7        | BE349584  | 3p24            |
| 203357_s_at | 13 | CAPN7        | NM_014296 | 3p24            |
| 200001_at   | 15 | CAPNS1       | NM_001749 | 19q13.13        |
| 208374_s_at | 15 | CAPZA1       | NM_006135 | 1p13.1          |
| 201237_at   | 15 | CAPZA2       | AV685920  | 7q31.2-q31.3    |
| 201238_s_at | 15 | CAPZA2       | BC005338  | 7q31.2-q31.3    |
| 201949_x_at | 15 | CAPZB        | AL572341  | 1p36.1          |
| 201950_x_at | 15 | CAPZB        | NM_004930 | 1p36.1          |
| 200603_at   | 15 | CAR          | AL050038  | 17q23-q24       |
| 210026_s_at | 15 | CARD10       | AW205153  | 22q13.1         |
| 204950_at   | 15 | CARD8        | NM_014959 | 19q13.33        |
| 218929_at   | 15 | CARF         | NM_017632 | 4q35.1          |
| 218384_at   | 15 | CARHSP1      | NM_014316 | 16p13.2         |
| 212512_s_at | 15 | CARM1        | AA551784  | 19p13.2         |
| 202402_s_at | 14 | CARS         | NM_001751 | 11p15.5         |
| 212971_at   | 15 | CARS         | AI769685  | 11p15.5         |
| 207842_s_at | 15 | CASC3        | NM_007359 | 17q11-q21.3     |
| 210563_x_at | 15 | CASH         | U97075    | 2q33-q34        |
| 210564_x_at | 14 | CASH         | AF009619  | 2q33-q34        |
| 211316_x_at | 15 | CASH         | AF009616  | 2q33-q34        |
| 211862_x_at | 15 | CASH         | AF015451  | 2q33-q34        |
| 214486_x_at | 10 | CASH         | AF041459  | 2q33-q34        |
| 211208_s_at | 15 | CASK         | AB039327  | Xp11.4          |
| 61297_at    | 12 | CASKIN2      | AL037338  | 17q25.3         |
| 202150_s_at | 15 | CASL         | U64317    | 6p25-p24        |
| 202763_at   | 15 | CASP3        | NM_004346 | 4q34            |
| 213596_at   | 13 | CASP4        | AL050391  | 11q22.2-q22.3   |
| 209790_s_at | 15 | CASP6        | BC000305  | 4q25            |
| 211464_x_at | 10 | CASP6        | U20537    | 4q25            |
| 207181_s_at | 14 | CASP7        | NM_001227 | 10q25           |
| 222201_s_at | 15 | CASP8AP2     | AB037736  | 6q16.1          |
| 203984_s_at | 15 | CASP9        | U60521    | 1p36.3-p36.1    |
| 219645_at   | 15 | CASQ1        | NM_001231 | 1q21            |
| 207317_s_at | 15 | CASQ2        | NM_001232 | 1p13.3-p11      |
| 207467_x_at | 15 | CAST         | NM_001750 | 5q15-q21        |
| 209701_at   | 12 | CAST         | D16217    | 5q15-q21        |
| 212586_at   | 15 | CAST         | AA195244  | 5q15-q21        |
| 220015_at   | 14 | CASZ1        | NM_017766 | 1p36.22         |
| 201432_at   | 15 | CAT          | NM_001752 | 11p13           |
| 211922_s_at | 15 | CAT          | AY028632  | 11p13 /// 11p13 |
| 209746_s_at | 15 | CAT5; CLK-1  | AF032900  | 16p13.11-p12.3  |
| 203065_s_at | 15 | CAV1         | NM_001753 | 7q31.1          |
| 212097_at   | 15 | CAV1         | AU147399  | 7q31.1          |

|             |    |                |           |               |
|-------------|----|----------------|-----------|---------------|
| 203323_at   | 15 | CAV2           | BF197655  | 7q31.1        |
| 203324_s_at | 15 | CAV2           | NM_001233 | 7q31.1        |
| 208204_s_at | 11 | CAV3           | NM_001234 | 3p25          |
| 201478_s_at | 13 | CBF5           | U59151    | Xq28          |
| 207625_s_at | 14 | CBFA2T2        | NM_005093 | 20q11         |
| 208056_s_at | 12 | CBFA2T3        | NM_005187 | 16q24         |
| 202370_s_at | 15 | CBFB           | NM_001755 | 16q22.1       |
| 213626_at   | 15 | CBR4; FLJ14431 | AL049442  | 4q32.3        |
| 212816_s_at | 12 | CBS            | BE613178  | 21q22.3       |
| 220175_s_at | 15 | CBWD1          | NM_020667 | ---           |
| 201518_at   | 15 | CBX1           | NM_006807 | 17q           |
| 200037_s_at | 15 | CBX3           | NM_016587 | 7p15.2        |
| 201091_s_at | 15 | CBX3           | NM_016587 | 7p15.2        |
| 212126_at   | 13 | CBX5           | BG391282  | ---           |
| 202047_s_at | 14 | CBX6           | AI458128  | 22q13.1       |
| 212914_at   | 12 | CBX7           | AV648364  | 22q13.1       |
| 208720_s_at | 15 | CC1.4          | L10911    | 20q11.23      |
| 215717_s_at | 13 | CCA            | X62009    | 5q23-q31      |
| 206037_at   | 15 | CCBL1          | NM_004059 | 9q34.13       |
| 220466_at   | 12 | CCDC15         | NM_025004 | 11q24.2       |
| 206016_at   | 12 | CCDC22         | NM_014008 | Xp11.23       |
| 219644_at   | 15 | CCDC41         | NM_016122 | 12q22         |
| 221069_s_at | 15 | CCDC44         | NM_016360 | 17q24.2       |
| 217814_at   | 15 | CCDC47         | NM_020198 | 17q24.2       |
| 218655_s_at | 15 | CCDC49         | NM_017748 | 17q21.2       |
| 218722_s_at | 14 | CCDC51         | NM_024661 | 3p21.31       |
| 204716_at   | 12 | CCDC6          | NM_005436 | 10q21         |
| 206257_at   | 15 | CCDC9          | NM_015603 | 19q13.33      |
| 204606_at   | 14 | CCL21          | NM_002989 | 9p13          |
| 209101_at   | 15 | CCN2           | M92934    | 6q23.1        |
| 203418_at   | 15 | CCNA2          | NM_001237 | 4q25-q31      |
| 214710_s_at | 15 | CCNB1          | BE407516  | 5q12          |
| 217988_at   | 15 | CCNB1IP1       | NM_021178 | 14q11.2       |
| 202705_at   | 15 | CCNB2          | NM_004701 | 15q21.3       |
| 201955_at   | 15 | CCNC           | AL137784  | 6q21          |
| 208711_s_at | 13 | CCND1          | BC000076  | 11q13         |
| 200951_s_at | 13 | CCND2          | AW026491  | 12p13         |
| 200953_s_at | 15 | CCND2          | NM_001759 | 12p13         |
| 201700_at   | 15 | CCND3          | NM_001760 | 6p21          |
| 205034_at   | 12 | CCNE2          | NM_004702 | 8q22.1        |
| 208796_s_at | 15 | CCNG1          | BC000196  | 5q32-q34      |
| 202769_at   | 15 | CCNG2          | AW134535  | 4q21.22       |
| 202770_s_at | 14 | CCNG2          | NM_004354 | 4q21.22       |
| 211559_s_at | 13 | CCNG2          | L49506    | 4q21.22       |
| 204093_at   | 15 | CCNH           | NM_001239 | 5q13.3-q14    |
| 208655_at   | 15 | CCNI           | BG530368  | 4q21.22       |
| 208656_s_at | 15 | CCNI           | BG530368  | 4q21.22       |
| 219470_x_at | 13 | CCNJ           | NM_019084 | 10pter-q26.12 |
| 220046_s_at | 15 | CCNL1          | NM_020307 | 3q25.32       |
| 204645_at   | 15 | CCNT2          | NM_001241 | 2q21.3        |

|             |    |              |           |               |
|-------------|----|--------------|-----------|---------------|
| 213743_at   | 15 | CCNT2        | BE674119  | 2q21.3        |
| 221156_x_at | 14 | CCPG1        | NM_004748 | 15q21.1       |
| 220671_at   | 12 | CCRN4L       | NM_012118 | 4q28.3        |
| 203522_at   | 15 | CCS          | NM_005125 | 11q13         |
| 201946_s_at | 15 | CCT2         | AL545982  | 12q14.3       |
| 201947_s_at | 15 | CCT2         | NM_006431 | 12q14.3       |
| 200910_at   | 15 | CCT3         | NM_005998 | 1q23          |
| 200877_at   | 15 | CCT4         | NM_006430 | 2p15          |
| 201326_at   | 15 | CCT6A        | BE737030  | 7p11.2        |
| 201327_s_at | 15 | CCT6A        | NM_001762 | 7p11.2        |
| 200812_at   | 15 | CCT7         | NM_006429 | 2p13.2        |
| 200873_s_at | 15 | CCT8         | NM_006585 | 21q22.11      |
| 208696_at   | 15 | CCTE         | AF275798  | 5p15.31       |
| 211676_s_at | 15 | CD119; IFNGR | AF056979  | 6q23-q24      |
| 201743_at   | 15 | CD14         | NM_000591 | 5q22-q32      |
| 209087_x_at | 15 | CD146; MUC18 | AF089868  | 11q23.3       |
| 210869_s_at | 15 | CD146; MUC18 | M29277    | 11q23.3       |
| 211340_s_at | 15 | CD146; MUC18 | M28882    | 11q23.3       |
| 204306_s_at | 15 | CD151        | NM_004357 | 11p15.5       |
| 204007_at   | 10 | CD16         | J04162    | 1q23          |
| 203645_s_at | 14 | CD163        | NM_004244 | 12p13.3       |
| 208405_s_at | 15 | CD164        | NM_006016 | 6q21          |
| 205789_at   | 14 | CD1D         | NM_001766 | 1q22-q23      |
| 209582_s_at | 14 | CD200        | H23979    | 3q12-q13      |
| 209771_x_at | 12 | CD24         | AA761181  | 6q21          |
| 216379_x_at | 12 | CD24         | AK000168  | ---           |
| 219025_at   | 15 | CD248        | NM_020404 | 11q13         |
| 203593_at   | 15 | CD2AP        | NM_012120 | 6p12          |
| 202256_at   | 10 | CD2BP2       | BF793888  | 16p12.1       |
| 203799_at   | 15 | CD302        | NM_014880 | 2q24.2        |
| 208982_at   | 15 | CD31         | M37780    | 17q23         |
| 208983_s_at | 14 | CD31         | M37780    | 17q23         |
| 218529_at   | 11 | CD320        | NM_016579 | 19p13.3-p13.2 |
| 209543_s_at | 15 | CD34         | M81104    | 1q32          |
| 206488_s_at | 15 | CD36         | NM_000072 | 7q11.2        |
| 209555_s_at | 15 | CD36         | BE968792  | 7q11.2        |
| 35150_at    | 15 | CD40         | X60592    | 20q12-q13.2   |
| 204490_s_at | 11 | CD44         | M24915    | 11p13         |
| 209835_x_at | 13 | CD44         | BC004372  | 11p13         |
| 212014_x_at | 14 | CD44         | AI493245  | 11p13         |
| 212063_at   | 15 | CD44         | BE903880  | 11p13         |
| 213857_s_at | 15 | CD47         | BG230614  | 3q13.1-q13.2  |
| 203416_at   | 15 | CD53         | NM_000560 | 1p13          |
| 205173_x_at | 15 | CD58         | NM_001779 | 1p13          |
| 211744_s_at | 15 | CD58         | BC005930  | 1p13 /// 1p13 |
| 200983_x_at | 15 | CD59         | BF983379  | 11p13         |
| 200985_s_at | 15 | CD59         | NM_000611 | 11p13         |
| 212463_at   | 15 | CD59         | BE379006  | ---           |
| 200663_at   | 15 | CD63         | NM_001780 | 12q12-q13     |
| 200675_at   | 15 | CD81         | NM_004356 | 11p15.5       |

|             |    |          |           |                 |
|-------------|----|----------|-----------|-----------------|
| 204440_at   | 12 | CD83     | NM_004233 | 6p23            |
| 210845_s_at | 13 | CD87     | U08839    | 19q13           |
| 201005_at   | 15 | CD9      | NM_001769 | 12p13.3         |
| 201028_s_at | 15 | CD99     | U82164    | Xp22.32         |
| 201029_s_at | 15 | CD99     | NM_002414 | Xp22.32         |
| 221449_s_at | 15 | CDA08    | NM_030790 | 16q11.2         |
| 217436_x_at | 15 | CDA12    | M80469    | ---             |
| 208022_s_at | 14 | CDC14B   | NM_003671 | 9q22.33         |
| 221555_x_at | 15 | CDC14B   | BF792631  | 9q22.33         |
| 221556_at   | 15 | CDC14B   | BF792631  | 9q22.33         |
| 202717_s_at | 15 | CDC16    | NM_003903 | 13q34           |
| 209658_at   | 15 | CDC16    | AF164598  | 13q34           |
| 209659_s_at | 15 | CDC16    | AF164598  | 13q34           |
| 203213_at   | 15 | CDC2     | AL524035  | 10q21.1         |
| 203214_x_at | 15 | CDC2     | NM_001786 | 10q21.1         |
| 202870_s_at | 15 | CDC20    | NM_001255 | 1p34.1          |
| 202892_at   | 15 | CDC23    | NM_004661 | 5q31            |
| 201853_s_at | 15 | CDC25B   | NM_021873 | 20p13           |
| 217878_s_at | 10 | CDC27    | NM_001256 | 17q12-17q23.2   |
| 217879_at   | 15 | CDC27    | NM_001256 | 17q12-17q23.2   |
| 217880_at   | 15 | CDC27    | NM_001256 | ---             |
| 217881_s_at | 14 | CDC27    | NM_001256 | 17q12-17q23.2   |
| 211289_x_at | 11 | CDC2L2   | AF067524  | 1p36            |
| 212401_s_at | 15 | CDC2L2   | AI767436  | 1p36.3          |
| 207318_s_at | 15 | CDC2L5   | AJ297710  | 7p13            |
| 212897_at   | 11 | CDC2L6   | AI738802  | 6q22.1          |
| 212540_at   | 15 | CDC34    | BG476661  | 19p13.3         |
| 219343_at   | 15 | CDC37L1  | NM_017913 | ---             |
| 203376_at   | 15 | CDC40    | BG528818  | 6q22.1          |
| 208727_s_at | 12 | CDC42    | BC003682  | 1p36.1          |
| 208728_s_at | 15 | CDC42    | BC003682  | 1p36.1          |
| 214230_at   | 10 | CDC42    | R37664    | 1p36.1          |
| 203794_at   | 15 | CDC42BPA | NM_014826 | 1q42.11         |
| 214464_at   | 10 | CDC42BPA | NM_003607 | 1q42.11         |
| 217849_s_at | 15 | CDC42BPB | NM_006035 | 14q32.3         |
| 204693_at   | 11 | CDC42EP1 | NM_007061 | 22q13.1         |
| 209286_at   | 14 | CDC42EP3 | AI754416  | 2p21            |
| 209287_s_at | 15 | CDC42EP3 | AI754416  | 2p21            |
| 209288_s_at | 15 | CDC42EP3 | AL136842  | 2p21            |
| 218062_x_at | 15 | CDC42EP4 | NM_012121 | 17q24-q25       |
| 218157_x_at | 14 | CDC42SE1 | NM_020239 | 1q21.3          |
| 209055_s_at | 14 | CDC5L    | AW268817  | 6p21            |
| 209056_s_at | 15 | CDC5L    | NM_001253 | 6p21            |
| 209057_x_at | 14 | CDC5L    | AB007892  | 6p21            |
| 203968_s_at | 11 | CDC6     | NM_001254 | 17q21.3         |
| 204510_at   | 15 | CDC7     | NM_003503 | 1p22            |
| 221436_s_at | 11 | CDCA3    | NM_031299 | 12p13 /// 12p13 |
| 218399_s_at | 14 | CDCA4    | NM_017955 | 14q32.33        |
| 208834_x_at | 15 | CDH1     | BC001865  | 17q11           |
| 220115_s_at | 14 | CDH10    | NM_006727 | 5p14-p13        |

|             |    |               |           |               |
|-------------|----|---------------|-----------|---------------|
| 204726_at   | 10 | CDH13         | NM_001257 | 16q24.2-q24.3 |
| 206898_at   | 15 | CDH19         | NM_021153 | 18q22-q23     |
| 203441_s_at | 15 | CDH2          | NM_001792 | 18q11.2       |
| 204677_at   | 15 | CDH5          | NM_001795 | 16q22.1       |
| 201253_s_at | 15 | CDIPT         | NM_006319 | 16p12.1       |
| 210559_s_at | 15 | CDK1          | D88357    | 10q21.1       |
| 203468_at   | 10 | CDK10         | NM_003674 | 16q24         |
| 212899_at   | 15 | CDK11         | AB028951  | 6q22.1        |
| 204252_at   | 15 | CDK2          | M68520    | 12q13         |
| 201938_at   | 15 | CDK2AP1       | NM_004642 | 12q24.31      |
| 203252_at   | 14 | CDK2AP2       | NM_005851 | 11q13         |
| 202246_s_at | 15 | CDK4          | NM_000075 | 12q14         |
| 218315_s_at | 14 | CDK5RAP1      | NM_016408 | 20pter-q11.23 |
| 218740_s_at | 15 | CDK5RAP3      | NM_025197 | 17q21.32      |
| 204831_at   | 15 | CDK8          | R59697    | 13q12         |
| 219831_at   | 10 | CDKL3         | NM_016508 | 5q31          |
| 202284_s_at | 15 | CDKN1A        | NM_000389 | 6p21.2        |
| 209112_at   | 15 | CDKN1B        | BC001971  | 12p13.1-p12   |
| 213182_x_at | 15 | CDKN1C        | R78668    | 11p15.5       |
| 213183_s_at | 15 | CDKN1C        | N95363    | 11p15.5       |
| 213348_at   | 15 | CDKN1C        | N33167    | 11p15.5       |
| 216894_x_at | 15 | CDKN1C        | D64137    | ---           |
| 219534_x_at | 15 | CDKN1C        | NM_000076 | 11p15.5       |
| 204159_at   | 15 | CDKN2C        | NM_001262 | 1p32          |
| 214880_x_at | 12 | CDM           | D90453    | 7q33          |
| 204154_at   | 15 | CDO1          | NM_001801 | 5q22-q23      |
| 216751_at   | 10 | CDRT4         | AK024879  | ---           |
| 205709_s_at | 13 | CDS           | U65887    | 4q21.23       |
| 212862_at   | 15 | CDS2          | AL568982  | 20p13         |
| 212864_at   | 15 | cds2          | Y16521    | 20p13         |
| 203098_at   | 14 | CDYL          | AL050164  | 6p25.1        |
| 211657_at   | 10 | CEACAM6       | M18728    | 19q13.2       |
| 212501_at   | 15 | CEBPB         | AL564683  | 20q13.1       |
| 213006_at   | 11 | CEBPD         | AV655640  | 8q11.21       |
| 204203_at   | 13 | CEBPG         | NM_001806 | 19q13.12      |
| 203341_at   | 15 | CEBPZ         | NM_005760 | 2p22.3        |
| 219505_at   | 11 | CECR1         | NM_017424 | 22q11.2       |
| 218592_s_at | 15 | CECR5         | NM_017829 | ---           |
| 204235_s_at | 15 | CED6          | AF200715  | 2q32.3-q33    |
| 41660_at    | 12 | CELSR1        | AL031588  | 22q13.3       |
| 204029_at   | 15 | CELSR2        | NM_001408 | 1p21          |
| 36499_at    | 12 | CELSR2        | D87469    | 1p21          |
| 209172_s_at | 15 | CENF; PRO1779 | U30872    | 1q32-q41      |
| 204962_s_at | 14 | CENPA         | NM_001809 | 2p24-p21      |
| 204739_at   | 15 | CENPC1        | NM_001812 | 4q12-q13.3    |
| 207828_s_at | 15 | CENPF         | NM_005196 | 1q32-q41      |
| 212476_at   | 15 | CENTB2        | D26069    | 3q29          |
| 214102_at   | 13 | CENTD1        | AK023737  | ---           |
| 212516_at   | 11 | CENTD2        | AB018325  | 11q13.3       |
| 34206_at    | 14 | CENTD2        | AB018325  | 11q13.3       |



|             |    |                   |           |                |
|-------------|----|-------------------|-----------|----------------|
| 218950_at   | 15 | CENTD3            | NM_022481 | 5q31.3         |
| 204066_s_at | 15 | CENTG2            | NM_014914 | ---            |
| 221971_x_at | 15 | CENTG2            | BE672818  | 10q11.22       |
| 204251_s_at | 14 | CEP164            | NM_014956 | 11q23.3        |
| 220071_x_at | 15 | CEP27             | NM_018097 | 15q14          |
| 214721_x_at | 15 | CEP4              | AL162074  | 17q24-q25      |
| 218542_at   | 14 | CEP55             | NM_018131 | 10q23.33       |
| 203493_s_at | 15 | CEP57             | NM_014679 | 11q21          |
| 203494_s_at | 15 | CEP57             | NM_014679 | 11q21          |
| 209862_s_at | 15 | CEP57             | BC001233  | 11q21          |
| 219242_at   | 11 | CEP63             | NM_025180 | 3q22.1         |
| 207971_s_at | 12 | CEP68             | NM_015147 | 2p14           |
| 219375_at   | 14 | CEPT1             | NM_006090 | 1p13.2         |
| 218421_at   | 15 | CERK              | NM_022766 | 22q13.31       |
| 209667_at   | 15 | CES2              | BF033242  | 16q22.1        |
| 209194_at   | 15 | CETN2             | BC005334  | Xq28           |
| 209662_at   | 15 | CETN3             | BC005383  | 5q14.3         |
| 212610_at   | 15 | CFC               | U79291    | 12q24          |
| 203166_at   | 15 | CFDP1             | NM_006324 | 16q22.2-q22.3  |
| 200021_at   | 15 | CFL1              | NM_005507 | 11q13          |
| 208485_x_at | 15 | CFLAR             | NM_003879 | 2q33-q34       |
| 214730_s_at | 15 | CFR-1             | AK025457  | 16q22-q23      |
| 213375_s_at | 13 | CG018             | N80918    | 13q12-q13      |
| 206861_s_at | 15 | CGGBP1            | NM_003663 | 3p12-p11.1     |
| 212405_s_at | 14 | CGI-01            | AK001172  | 1q24-q25.3     |
| 212407_at   | 12 | CGI-01            | AL049669  | 1q24-q25.3     |
| 218036_x_at | 15 | CGI-07            | AL520719  | 3q26.1         |
| 202194_at   | 15 | CGI-100           | AL117354  | 1pter-q31.3    |
| 209404_s_at | 15 | CGI-109; FLJ90481 | AF151867  | 5q23.1         |
| 219037_at   | 15 | CGI-115           | NM_016052 | 1q41           |
| 218628_at   | 15 | CGI-116           | NM_016053 | 12q23.3        |
| 219030_at   | 15 | CGI-121           | NM_016058 | 2p24.3-p24.1   |
| 203259_s_at | 15 | CGI-130           | BC001671  | 6q13-q24.3     |
| 222360_at   | 11 | CGI-30            | AI291720  | 1p21.2         |
| 210076_x_at | 15 | CGI-55            | AF151813  | 1p31-p22       |
| 222133_s_at | 15 | CGI-72; MGC64923  | AK022280  | 8q24.22        |
| 204097_s_at | 15 | CGI-79            | AF078865  | Xq26.1         |
| 218549_s_at | 15 | CGI-90; FLJ20665  | AK000672  | 8q21.2         |
| 33307_at    | 15 | CGI-96            | AL022316  | 22q13.2-q13.31 |
| 204605_at   | 15 | CGRRF1            | NM_006568 | 14q22.2        |
| 214785_at   | 13 | CHAC              | AB023203  | 9q21           |
| 214426_x_at | 12 | CHAF1A            | BF062223  | 19p13.3        |
| 217720_at   | 15 | CHCHD2            | NM_016139 | 7p11.2         |
| 211927_x_at | 15 | CHCHD3            | BE963164  | ---            |
| 217972_at   | 15 | CHCHD3            | NM_017812 | 7q33           |
| 218642_s_at | 15 | CHCHD7            | NM_024300 | 8q11.23        |
| 220647_s_at | 14 | CHCHD8            | NM_016565 | 11q13.3        |
| 204258_at   | 15 | CHD1              | NM_001270 | 5q15-q21       |
| 212539_at   | 15 | CHD1L             | AI422099  | 1q12           |
| 201183_s_at | 15 | CHD4              | NM_001273 | 12p13          |

|             |    |                               |           |                 |
|-------------|----|-------------------------------|-----------|-----------------|
| 218829_s_at | 14 | CHD7                          | AI475906  | 8q12.1          |
| 212571_at   | 15 | CHD8                          | U00955    | 14q11.2         |
| 212615_at   | 15 | CHD9                          | AI742305  | 16q12.2         |
| 212616_at   | 15 | CHD9                          | BF668950  | 16q12.2         |
| 205393_s_at | 11 | CHEK1                         | NM_001274 | 11q24-q24       |
| 205394_at   | 11 | CHEK1                         | NM_001274 | 11q24-q24       |
| 202230_s_at | 15 | CHERP                         | NM_006387 | 19p13.1         |
| 205022_s_at | 15 | CHES1                         | NM_005197 | 14q24.3-q31     |
| 218031_s_at | 15 | CHES1                         | NM_018589 | 14q32.11        |
| 218803_at   | 15 | CHFR                          | NM_018223 | 12q24.33        |
| 219049_at   | 15 | ChGn                          | NM_018371 | 8p21.3          |
| 219492_at   | 15 | CHIC2                         | NM_012110 | 4q11            |
| 204233_s_at | 10 | CHKA                          | AI991328  | 11q13.1         |
| 204193_at   | 15 | CHKB                          | NM_005198 | 22q13.33        |
| 216594_x_at | 15 | chlordecone reductase homolog | S68290    | 10p15-p14       |
| 209160_at   | 13 | c-hluPGFS                     | AB018580  | 10p15-p14       |
| 218177_at   | 10 | CHMP1B                        | NM_020412 | 18p11.22-p11.21 |
| 218178_s_at | 13 | CHMP1B                        | NM_020412 | 18p11.22-p11.21 |
| 202536_at   | 15 | CHMP2.5                       | AK002165  | 3p12.1          |
| 202121_s_at | 15 | CHMP2A                        | NM_014453 | 19q             |
| 202537_s_at | 15 | CHMP2B                        | NM_014043 | 3p12.1          |
| 202538_s_at | 15 | CHMP2B                        | NM_014043 | 3p12.1          |
| 218571_s_at | 15 | CHMP4A                        | NM_014169 | 14q11.2         |
| 218572_at   | 12 | CHMP4A                        | NM_014169 | 14q11.2         |
| 218085_at   | 15 | CHMP5                         | NM_015961 | 9p13.3          |
| 219356_s_at | 15 | CHMP5                         | NM_016410 | 9p13.3          |
| 212313_at   | 15 | CHMP7                         | BC004344  | 8p21.2          |
| 216979_at   | 14 | CHN                           | X89894    | 9q22            |
| 212624_s_at | 15 | CHN1                          | BF339445  | 2q31-q32.1      |
| 207486_x_at | 13 | CHN2                          | NM_004067 | 7p15.3          |
| 213385_at   | 15 | CHN2                          | AK026415  | 7p15.3          |
| 218566_s_at | 15 | CHORDC1                       | NM_012124 | 11q14.3         |
| 214665_s_at | 15 | CHP; SLC9A1BP                 | AK000095  | ---             |
| 202175_at   | 15 | CHPF                          | NM_024536 | 2q36.1          |
| 203207_s_at | 15 | CHPPR                         | BF214329  | 8q12.3          |
| 203208_s_at | 15 | CHPPR                         | BF214329  | 8q12.3          |
| 207859_s_at | 10 | CHRN3                         | NM_000749 | 8p11.2          |
| 214246_x_at | 15 | CHRNE                         | AI859060  | 17p13-p12       |
| 205567_at   | 15 | CHST1                         | NM_003654 | 11p11.2-p11.1   |
| 204065_at   | 12 | CHST10                        | NM_004854 | 2q12.1          |
| 218927_s_at | 15 | CHST12                        | BC002918  | 7p22            |
| 203921_at   | 14 | CHST2                         | NM_004267 | 3q24            |
| 220446_s_at | 11 | CHST4                         | NM_005769 | 16q22.2         |
| 219182_at   | 15 | CHST5                         | NM_024533 | 16q22.3         |
| 64900_at    | 11 | CHST5                         | AA401703  | 16q22.3         |
| 221059_s_at | 13 | CHST6                         | NM_021615 | 16q22           |
| 203044_at   | 15 | CHSY1                         | NM_014918 | 15q26.3         |
| 212832_s_at | 15 | ch-TOG                        | AI143124  | 11p11.2         |
| 203428_s_at | 15 | CIA                           | AB028628  | 6q22.31         |
| 208424_s_at | 15 | CIAPIN1                       | NM_020313 | 16q13-q21       |

|             |    |                    |           |                          |
|-------------|----|--------------------|-----------|--------------------------|
| 208968_s_at | 15 | CIAPIN1            | BC002568  | 16q13-q21                |
| 201953_at   | 15 | CIB1               | NM_006384 | 15q25.3-q26              |
| 205007_s_at | 15 | CIB2               | NM_006383 | 15q24                    |
| 205008_s_at | 15 | CIB2               | NM_006383 | 15q24                    |
| 212784_at   | 13 | CIC                | AB002304  | 19q13.2                  |
| 221188_s_at | 14 | CIDEB              | NM_014430 | 14q11.2                  |
| 219398_at   | 13 | CIDEC              | NM_022094 | 3p25.3                   |
| 216591_s_at | 14 | CII-3              | AF080579  | ---                      |
| 206227_at   | 14 | CILP               | NM_003613 | 15q22                    |
| 218267_at   | 15 | CINP               | NM_016550 | 14q32.33 ///<br>14q32.33 |
| 200810_s_at | 15 | CIRBP              | NM_001280 | 19p13.3                  |
| 200811_at   | 15 | CIRBP              | NM_001280 | 19p13.3                  |
| 207980_s_at | 15 | CITED2             | NM_006079 | 6q23.3                   |
| 205516_x_at | 13 | CIZ1               | NM_012127 | 9q34.1                   |
| 201804_x_at | 15 | CKAP1              | NM_001281 | 19q13.11-q13.12          |
| 211759_x_at | 15 | CKAP1              | BC005969  | 19q13.11-q13.12          |
| 216194_s_at | 15 | CKAP1              | AD001527  | 19q13.11-q13.12          |
| 218252_at   | 15 | CKAP2              | NM_018204 | 13q14                    |
| 200998_s_at | 15 | CKAP4              | AW029619  | 12q24.11                 |
| 200999_s_at | 15 | CKAP4              | NM_006825 | 12q24.11                 |
| 200884_at   | 15 | CKB                | NM_001823 | 14q32                    |
| 209211_at   | 11 | CKLF               | AF132818  | 13q21.33                 |
| 209212_s_at | 11 | CKLF               | AF132818  | 13q21.33                 |
| 219161_s_at | 14 | CKLF               | NM_016951 | 16q22.1                  |
| 221058_s_at | 15 | CKLF               | NM_016326 | 16q22.1                  |
| 204810_s_at | 15 | CKM                | NM_001824 | 19q13.2-q13.3            |
| 205295_at   | 15 | CKMT2              | NM_001825 | 5q13.3                   |
| 201897_s_at | 15 | CKS1B              | BC001425  | 1q21.2                   |
| 204170_s_at | 15 | CKS2               | NM_001827 | 9q22                     |
| 213379_at   | 15 | CL640; FLJ26072    | AF091086  | 4q21.3                   |
| 209508_x_at | 15 | clarp              | AF005774  | 2q33-q34                 |
| 209939_x_at | 15 | clarp              | AF005775  | 2q33-q34                 |
| 212752_at   | 15 | CLASP1             | AA176798  | 2q14.2-q14.3             |
| 212306_at   | 15 | CLASP2             | AI741784  | 3p22.3                   |
| 212308_at   | 14 | CLASP2             | AL137636  | 3p22.3                   |
| 212309_at   | 14 | CLASP2             | AI741784  | 3p22.3                   |
| 38069_at    | 14 | CLC7; CLC-7; OPTA2 | Z67743    | 16p13                    |
| 207855_s_at | 14 | CLCC1              | NM_015127 | 1p13.3                   |
| 209143_s_at | 15 | CLCI               | AF005422  | 11q13.5-q14              |
| 201734_at   | 15 | CLCN3              | AI760629  | 4q33                     |
| 201735_s_at | 15 | CLCN3              | NM_001829 | 4q33                     |
| 203950_s_at | 11 | CLCN6              | NM_001286 | 1p36                     |
| 207047_s_at | 12 | CLCNKA             | NM_004070 | 1p36                     |
| 205328_at   | 15 | CLDN10             | NM_006984 | 13q31-q34                |
| 214135_at   | 10 | CLDN18             | BE551219  | 3q22.3                   |
| 204482_at   | 15 | CLDN5              | NM_003277 | 22q11.21                 |
| 212351_at   | 15 | CLE                | U23028    | 3q27.3                   |
| 211709_s_at | 13 | CLEC11A            | BC005810  | 19q13.3 /// 19q13.3      |
| 219761_at   | 15 | CLEC1A             | NM_016511 | 12p13.31                 |

|             |    |                 |           |                   |
|-------------|----|-----------------|-----------|-------------------|
| 209732_at   | 15 | CLEC2B          | BC005254  | 12p13-p12         |
| 205200_at   | 15 | CLEC3B          | NM_003278 | 3p22-p21.3        |
| 205830_at   | 15 | CLGN            | NM_004362 | 4q28.3-q31.1      |
| 208791_at   | 15 | CLI             | M25915    | 8p21-p12          |
| 208792_s_at | 15 | CLI             | M25915    | 8p21-p12          |
| 213415_at   | 14 | CLIC2           | AI768628  | Xq28              |
| 201559_s_at | 15 | CLIC4           | AF109196  | 1p36.11           |
| 201560_at   | 15 | CLIC4           | NM_013943 | 1p36.11           |
| 221881_s_at | 14 | CLIC4           | AI638420  | 1p36.11           |
| 213317_at   | 15 | CLIC5           | AL049313  | ---               |
| 217628_at   | 12 | CLIC5           | BF032808  | ---               |
| 219866_at   | 15 | CLIC5           | NM_016929 | 6p12.1-21.1       |
| 35160_at    | 13 | CLIM2           | AF064491  | 10q24-q25         |
| 210716_s_at | 12 | CLIP            | M97501    | 12q24.3           |
| 214683_s_at | 15 | CLK1            | AI251890  | 2q33              |
| 210346_s_at | 15 | CLK1; STY; CLK4 | AF212224  | 2q33              |
| 202140_s_at | 15 | CLK3            | NM_003992 | 15q24             |
| 209275_s_at | 11 | CLN3            | AF015593  | 16p12.1           |
| 210859_x_at | 14 | CLN3            | AF077973  | 16p12.1           |
| 204084_s_at | 15 | CLN5            | NM_006493 | 13q21.1-q32       |
| 204085_s_at | 11 | CLN5            | NM_006493 | 13q21.1-q32       |
| 214252_s_at | 14 | CLN5            | AV700514  | 13q21.1-q32       |
| 204980_at   | 13 | CLOCK           | NM_004898 | 4q12              |
| 202799_at   | 15 | CLPP            | NM_006012 | 19p13.3           |
| 201640_x_at | 11 | CLPTM1          | NM_001294 | 19q13.2-q13.3     |
| 211136_s_at | 14 | CLPTM1          | BC004865  | 19q13.2-q13.3     |
| 204809_at   | 15 | CLPX            | NM_006660 | 15q22.2-q22.3     |
| 201561_s_at | 15 | CLSTN1          | NM_014944 | 1p36.22           |
| 200960_x_at | 15 | CLTA            | NM_007096 | 9p13              |
| 204050_s_at | 15 | CLTA            | NM_001833 | 9p13              |
| 216295_s_at | 15 | CLTA            | X81636    | 9p13              |
| 205172_x_at | 15 | CLTB            | NM_007097 | 4q2-q3            |
| 206284_x_at | 15 | CLTB            | NM_001834 | 4q2-q3            |
| 211043_s_at | 15 | CLTB            | BC006332  | 4q2-q3 /// 4q2-q3 |
| 200614_at   | 15 | CLTC            | NM_004859 | 17q11-qter        |
| 222043_at   | 14 | CLU             | AI982754  | 8p21-p12          |
| 204576_s_at | 15 | CLUAP1          | AA207013  | 16p13.3           |
| 204577_s_at | 12 | CLUAP1          | NM_024793 | 16p13.3           |
| 205518_s_at | 11 | CMAH            | NM_003570 | --- /// ---       |
| 218111_s_at | 15 | CMAS            | NM_018686 | 12p12.2           |
| 212977_at   | 15 | CMKOR1          | AI817041  | 2q37.3            |
| 217870_s_at | 15 | CMPK            | NM_016308 | ---               |
| 208693_s_at | 15 | CMT2D           | D30658    | 7p15              |
| 217947_at   | 15 | CMTM6           | NM_017801 | 3p22.3            |
| 201774_s_at | 14 | CNAP1; KIAA0159 | AK022511  | 12p13.3           |
| 217752_s_at | 13 | CNDP2           | NM_018235 | 18q22.3           |
| 201653_at   | 15 | CNIH            | NM_005776 | 14q22.2           |
| 203951_at   | 15 | CNN1            | NM_001299 | 19p13.2-p13.1     |
| 201605_x_at | 11 | CNN2            | NM_004368 | 21q11.1           |
| 201445_at   | 15 | CNN3            | NM_001839 | 1p22-p21          |

|             |    |                |           |               |
|-------------|----|----------------|-----------|---------------|
| 206818_s_at | 14 | CNNM2          | NM_017649 | 10q24.33      |
| 220739_s_at | 15 | CNNM3          | NM_017623 | 2p12-p11.2    |
| 200860_s_at | 15 | CNOT1          | BC000779  | 16q13         |
| 200861_at   | 14 | CNOT1          | NM_016284 | 16q13         |
| 217798_at   | 15 | CNOT2          | NM_014515 | 12q14.3-q15   |
| 222182_s_at | 15 | CNOT2          | BG105204  | 12q14.3-q15   |
| 203239_s_at | 14 | CNOT3          | NM_014516 | 19q13.4       |
| 203291_at   | 15 | CNOT4          | NM_013316 | 7q22-qter     |
| 217970_s_at | 13 | CNOT6          | NM_015455 | 5q35.3        |
| 218250_s_at | 15 | CNOT7          | NM_013354 | 8p22-p21.3    |
| 219400_at   | 11 | CNTNAP1        | NM_003632 | 17q21         |
| 219301_s_at | 10 | CNTNAP2        | NM_014141 | 7q35-q36      |
| 208853_s_at | 15 | CNX; P90; IP90 | L18887    | 5q35          |
| 201913_s_at | 11 | COASY          | NM_025233 | 17q12-q21     |
| 203642_s_at | 15 | COBLL1         | NM_014900 | 2q24.3        |
| 202757_at   | 15 | COBRA1         | NM_015456 | 9q34          |
| 212189_s_at | 14 | COD1           | AK022874  | 16q22.1       |
| 203073_at   | 15 | COG2           | NM_007357 | 1q42.2        |
| 203629_s_at | 15 | COG5           | AU152134  | 7q22-q31      |
| 203630_s_at | 15 | COG5           | NM_006348 | 7q22-q31      |
| 213190_at   | 11 | COG7           | R61519    | 16p12.3       |
| 213243_at   | 15 | COH1           | AI052003  | 8q22.2        |
| 203654_s_at | 14 | COIL           | NM_004645 | 17q22-q23     |
| 204320_at   | 15 | COL11A1        | NM_001854 | 1p21          |
| 37892_at    | 15 | COL11A1        | J04177    | 1p21          |
| 213870_at   | 10 | COL11A2        | AL031228  | 6p21.3        |
| 216993_s_at | 15 | COL11A2        | U32169    | ---           |
| 212865_s_at | 15 | COL14A1        | BF449063  | 8q23          |
| 203477_at   | 15 | COL15A1        | NM_001855 | 9q21-q22      |
| 204345_at   | 15 | COL16A1        | NM_001856 | 1p35-p34      |
| 209081_s_at | 15 | COL18A1        | AF018081  | 21q22.3       |
| 209082_s_at | 15 | COL18A1        | AF018081  | 21q22.3       |
| 202310_s_at | 15 | COL1A1         | K01228    | 17q21.3-q22.1 |
| 202311_s_at | 15 | COL1A1         | AI743621  | 17q21.3-q22.1 |
| 217430_x_at | 14 | COL1A1         | Y15916    | ---           |
| 202403_s_at | 15 | COL1A2         | NM_000089 | 7q22.1        |
| 202404_s_at | 15 | COL1A2         | NM_000089 | 7q22.1        |
| 208096_s_at | 15 | COL21A1        | NM_030820 | 6p12.3-p11.2  |
| 201852_x_at | 15 | COL3A1         | NM_000090 | 2q31          |
| 211161_s_at | 15 | COL3A1         | AF130082  | ---           |
| 215076_s_at | 15 | COL3A1         | AU144167  | 2q31          |
| 211980_at   | 15 | COL4A1         | AI922605  | 13q34         |
| 211981_at   | 15 | COL4A1         | NM_001845 | 13q34         |
| 211343_s_at | 13 | COL4A2         | M33653    | 10q22         |
| 211964_at   | 15 | COL4A2         | X05610    | 13q34         |
| 211966_at   | 15 | COL4A2         | AA909035  | 13q34         |
| 222073_at   | 10 | COL4A3         | AI694562  | 2q36-q37      |
| 213110_s_at | 15 | COL4A5         | AW052179  | Xq22          |
| 213992_at   | 15 | COL4A6         | AI889941  | Xq22          |
| 203325_s_at | 15 | COL5A1         | AI130969  | 9q34.2-q34.3  |

|             |    |         |           |                 |
|-------------|----|---------|-----------|-----------------|
| 212488_at   | 15 | COL5A1  | N30339    | 9q34.2-q34.3    |
| 212489_at   | 15 | COL5A1  | AI983428  | 9q34.2-q34.3    |
| 221729_at   | 15 | COL5A2  | AL575735  | 2q14-q32        |
| 221730_at   | 15 | COL5A2  | AL575735  | 2q14-q32        |
| 218975_at   | 10 | COL5A3  | NM_015719 | 19p13.2         |
| 52255_s_at  | 15 | COL5A3  | AI984221  | 19p13.2         |
| 212091_s_at | 10 | COL6A1  | AI141603  | 21q22.3         |
| 213428_s_at | 15 | COL6A1  | AA292373  | 21q22.3         |
| 209156_s_at | 15 | COL6A2  | AY029208  | 21q22.3         |
| 213290_at   | 15 | COL6A2  | AL531750  | 21q22.3         |
| 201438_at   | 15 | COL6A3  | NM_004369 | 2q37            |
| 204136_at   | 13 | COL7A1  | NM_000094 | 3p21.1          |
| 213622_at   | 13 | COL9A2  | AI733465  | 1p33-p32        |
| 219873_at   | 15 | COLEC11 | NM_024027 | 2p25.3          |
| 221019_s_at | 15 | COLEC12 | NM_030781 | 18pter-p11.3    |
| 209230_s_at | 15 | COM1    | AF135266  | 16p11.2         |
| 218439_s_at | 15 | COMMD10 | BC005179  | 5q23.1          |
| 218048_at   | 15 | COMMD3  | NM_012071 | 10pter-q22.1    |
| 209132_s_at | 15 | COMMD4  | BE313890  | 15q23           |
| 218351_at   | 15 | COMMD8  | NM_017845 | 4p12            |
| 218072_at   | 14 | COMMD9  | NM_014186 | 11p13           |
| 208817_at   | 15 | COMT    | BC000419  | 22q11.21-q11.23 |
| 208818_s_at | 15 | COMT    | BC000419  | 22q11.21-q11.23 |
| 208684_at   | 15 | COPA    | U24105    | 1q23-q25        |
| 214336_s_at | 12 | COPA    | AI621079  | 1q23-q25        |
| 201358_s_at | 15 | COPB    | NM_016451 | 11p15.2         |
| 201359_at   | 15 | COPB    | NM_016451 | 11p15.2         |
| 201098_at   | 15 | COPB2   | NM_004766 | 3q23            |
| 201264_at   | 12 | COPE    | NM_007263 | 19p13.11        |
| 217749_at   | 15 | COPG    | NM_016128 | 3q21.3          |
| 202467_s_at | 15 | COPS2   | NM_004236 | 15q21.2         |
| 209838_at   | 13 | COPS2   | AA496247  | 15q21.2         |
| 202078_at   | 15 | COPS3   | NM_003653 | 17p11.2         |
| 218042_at   | 15 | COPS4   | NM_016129 | 4q21.3          |
| 201652_at   | 15 | COPS5   | NM_006837 | 8q13.1          |
| 201405_s_at | 15 | COPS6   | NM_006833 | 7q22.1          |
| 213504_at   | 15 | COPS6   | W63732    | 7q22.1          |
| 202141_s_at | 15 | COPS8   | BC003090  | 2q37.3          |
| 202142_at   | 14 | COPS8   | BC003090  | 2q37.3          |
| 202143_s_at | 15 | COPS8   | BC003090  | 2q37.3          |
| 214260_at   | 12 | COPS8   | AI079287  | 2q37.3          |
| 217726_at   | 15 | COPZ1   | NM_016057 | 12q13.2-q13.3   |
| 221227_x_at | 13 | COQ3    | NM_017421 | 6q16.3          |
| 218328_at   | 13 | COQ4    | NM_016035 | 9q34.13         |
| 218760_at   | 15 | COQ6    | NM_015940 | 14q24.2         |
| 210820_x_at | 15 | COQ7    | AL136647  | 16p13.11-p12.3  |
| 220356_at   | 15 | CORIN   | NM_006587 | 4p13-p12        |
| 64486_at    | 15 | CORO1B  | AI341234  | 11q13.1         |
| 221676_s_at | 15 | CORO1C  | BC002342  | 12q24.1         |
| 209789_at   | 13 | CORO2B  | BF939649  | 15q22.31        |

|             |    |                |           |                 |
|-------------|----|----------------|-----------|-----------------|
| 213454_at   | 14 | CORT           | AL578583  | ---             |
| 203858_s_at | 15 | COX10          | NM_001303 | 17p12-17p11.2   |
| 203551_s_at | 15 | COX11          | NM_004375 | 17q22           |
| 211727_s_at | 15 | COX11          | BC005895  | 17q22 /// 17q22 |
| 219547_at   | 15 | COX15          | NM_004376 | 10q24           |
| 221550_at   | 11 | COX15          | BC002382  | 10q24           |
| 203880_at   | 15 | COX17          | NM_005694 | 3q13.33         |
| 200086_s_at | 15 | COX4I1         | AA854966  | 16q22-qter      |
| 202698_x_at | 15 | COX4I1         | NM_001861 | 16q22-qter      |
| 212312_at   | 15 | COX4I2         | AL117381  | 20q11.21        |
| 218057_x_at | 15 | COX4NB         | BC001472  | 16q24           |
| 203663_s_at | 15 | COX5A          | NM_004255 | 15q25           |
| 202343_x_at | 15 | COX5B          | NM_001862 | 2cen-q13        |
| 211025_x_at | 15 | COX5B          | BC006229  | 2cen-q13        |
| 213735_s_at | 15 | COX5B          | AI557312  | 2cen-q13        |
| 200925_at   | 15 | COX6A1         | NM_004373 | 12q24.2         |
| 206353_at   | 15 | COX6A2         | NM_005205 | 16p             |
| 201441_at   | 15 | COX6B1         | NM_001863 | 19q13.1         |
| 201754_at   | 15 | COX6C          | NM_004374 | 8q22-q23        |
| 217191_x_at | 15 | COX6CP1        | AF042163  | ---             |
| 204570_at   | 15 | COX7A1         | NM_001864 | 19q13.1         |
| 201597_at   | 15 | COX7A2         | NM_001865 | 6q12            |
| 201256_at   | 15 | COX7A2L        | NM_004718 | 2p22.1          |
| 202110_at   | 15 | COX7B          | NM_001866 | Xq13.3          |
| 217329_x_at | 15 | COX7BP1        | AF042164  | ---             |
| 201134_x_at | 15 | COX7C          | NM_001867 | 5q14            |
| 213846_at   | 15 | COX7C          | AA382702  | 5q14            |
| 217491_x_at | 15 | COX7CP1        | AF042165  | ---             |
| 201119_s_at | 15 | COX8A          | NM_004074 | 11q12-q13       |
| 204662_at   | 14 | CP110          | NM_014711 | 16p13.11        |
| 209338_at   | 15 | CP2            | U03494    | 12q13           |
| 205624_at   | 10 | CPA3           | NM_001870 | 3q21-q25        |
| 201940_at   | 14 | CPD            | AA897514  | 17p11.1-q11.2   |
| 201941_at   | 15 | CPD            | BE349147  | 17p11.1-q11.2   |
| 201116_s_at | 13 | CPE            | NM_001873 | 4q32.3          |
| 201117_s_at | 14 | CPE            | NM_001873 | 4q32.3          |
| 205773_at   | 12 | CPEB3          | NM_014912 | 10q23.33        |
| 210145_at   | 14 | cPLA2          | M68874    | 1q25            |
| 206918_s_at | 15 | CPNE1          | NM_003915 | 20q11.23        |
| 212170_at   | 12 | CPNE1          | BF447705  | 20q11.23        |
| 202118_s_at | 15 | CPNE3          | AA541758  | 8q21.2          |
| 202119_s_at | 15 | CPNE3          | NM_003909 | 8q21.2          |
| 204172_at   | 15 | CPOX           | NM_000097 | 3q12            |
| 221511_x_at | 15 | CPR8; KIAA1254 | AF212228  | 15q21.1         |
| 222156_x_at | 14 | CPR8; KIAA1254 | AK022459  | 15q21.1         |
| 201639_s_at | 12 | CPSF1          | NM_013291 | 8q24.23         |
| 33132_at    | 15 | CPSF160        | U37012    | 8q24.23         |
| 217994_x_at | 15 | CPSF3L         | NM_017871 | 1p36.33         |
| 206688_s_at | 12 | CPSF4          | NM_006693 | 7q22.1          |
| 213461_at   | 13 | CPSF5          | AI800983  | 16q13           |

|             |    |             |           |               |
|-------------|----|-------------|-----------|---------------|
| 202469_s_at | 15 | CPSF6       | NM_007007 | 12q14.3       |
| 221675_s_at | 15 | CPT; CPT1   | AF195624  | 12q           |
| 203633_at   | 14 | CPT1A       | BF001714  | 11q13.1-q13.2 |
| 210069_at   | 15 | CPT1-M      | U62733    | 22q13.33      |
| 210070_s_at | 15 | CPT1-M      | U62733    | 22q13.33      |
| 208146_s_at | 15 | CPVL        | NM_031311 | 7p15-p14      |
| 209522_s_at | 15 | CRAT        | BC000723  | 9q34.1        |
| 218142_s_at | 15 | CRBN        | NM_016302 | 3p26.2        |
| 204312_x_at | 11 | CREB1       | AI655737  | 2q34          |
| 204313_s_at | 15 | CREB1       | AA161486  | 2q34          |
| 204314_s_at | 15 | CREB1       | NM_004379 | 2q34          |
| 214513_s_at | 11 | CREB1       | M34356    | 2q34          |
| 212345_s_at | 15 | CREB3L2     | BE675139  | 7q34          |
| 205931_s_at | 12 | CREB5       | NM_004904 | 7p15          |
| 202160_at   | 15 | CREBBP      | NM_004380 | 16p13.3       |
| 201988_s_at | 15 | CREBL2      | BF438056  | 12p13         |
| 201989_s_at | 15 | CREBL2      | NM_001310 | 12p13         |
| 201990_s_at | 15 | CREBL2      | NM_001310 | 12p13         |
| 201200_at   | 15 | CREG1       | NM_003851 | 1q24          |
| 203368_at   | 15 | CRELD1      | NM_015513 | 3p25.3        |
| 218358_at   | 15 | CRELD2      | NM_024324 | 22p13         |
| 207630_s_at | 15 | CREM        | NM_001881 | 10p11.21      |
| 209967_s_at | 15 | CREM        | D14826    | 10p11.21      |
| 214508_x_at | 15 | CREM        | U44836    | 10p11.21      |
| 202551_s_at | 15 | CRIM1       | BG546884  | 2p21          |
| 202552_s_at | 15 | CRIM1       | NM_016441 | 2p21          |
| 205081_at   | 15 | CRIP1       | NM_001311 | 7q11.23       |
| 218643_s_at | 15 | CRIPT       | BF540954  | 2p21          |
| 202224_at   | 15 | CRK         | NM_016823 | ---           |
| 202225_at   | 15 | CRK         | AW612311  | ---           |
| 212180_at   | 15 | CRKL        | AK000311  | 22q11         |
| 219226_at   | 10 | CRKRS       | NM_016507 | 17q21.2       |
| 205474_at   | 15 | CRLF3       | NM_015986 | 17q11.2       |
| 210815_s_at | 14 | CRLR; CGRPR | U17473    | 2q32.2        |
| 208775_at   | 15 | CRM1        | D89729    | 2p16          |
| 202517_at   | 14 | CRMP1       | NM_001313 | 4p16.1-p15    |
| 219913_s_at | 15 | CRNKL1      | NM_016652 | 20p11.2       |
| 203804_s_at | 15 | CROP        | NM_006107 | 17q21         |
| 208835_s_at | 15 | CROP        | AW089673  | 17q21         |
| 220044_x_at | 15 | CROP        | NM_016424 | 17q21         |
| 204573_at   | 15 | CROT        | NM_021151 | 7q21.1        |
| 202611_s_at | 11 | CRSP2       | NM_004229 | Xp11.4-p11.2  |
| 215167_at   | 14 | CRSP2       | BE567032  | Xp11.4-p11.2  |
| 218846_at   | 15 | CRSP3       | NM_004830 | 6q22.33-q24.1 |
| 51176_at    | 15 | CRSP8       | AA131335  | 9q34.1-q34.3  |
| 204349_at   | 11 | CRSP9       | BC005250  | 5q33.3        |
| 204350_s_at | 15 | CRSP9       | NM_004270 | 5q33.3        |
| 221204_s_at | 12 | CRTAC1      | NM_018058 | 10q22         |
| 201380_at   | 15 | CRTAP       | NM_006371 | 3p22          |
| 207159_x_at | 12 | CRTC1       | NM_025021 | 19p13.11      |



|             |    |              |           |                |
|-------------|----|--------------|-----------|----------------|
| 218648_at   | 15 | CRTC3        | NM_022769 | 15q26.1        |
| 209283_at   | 15 | CRYA2        | AF007162  | 11q22.3-q23.1  |
| 220753_s_at | 15 | CRYL1        | NM_015974 | 13q12.11       |
| 205489_at   | 14 | CRYM         | NM_001888 | 16p13.11-p12.3 |
| 202950_at   | 15 | CRYZ         | NM_001889 | 1p31-p22       |
| 219767_s_at | 15 | CRYZL1       | NM_005111 | 21q21.3        |
| 208660_at   | 15 | CS           | BC000105  | 12q13.2-q13.3  |
| 211476_at   | 15 | CS-1; C4orf5 | AY013295  | 4q26-q27       |
| 200066_at   | 15 | CSA2         | AF182645  | 2p15-p14       |
| 221139_s_at | 15 | CSAD         | NM_015989 | 12q13.11-q14.3 |
| 201160_s_at | 15 | CSDA         | AL556190  | 12p13.1        |
| 201161_s_at | 15 | CSDA         | AL556190  | 12p13.1        |
| 219939_s_at | 15 | CSDE1        | NM_007158 | 1p22           |
| 201111_at   | 15 | CSE1         | AF053641  | 20q13          |
| 201112_s_at | 15 | CSE1         | AF053641  | 20q13          |
| 210766_s_at | 15 | CSE1         | AF053640  | 20q13          |
| 203104_at   | 13 | CSF1R        | NM_005211 | 5q33-q35       |
| 205159_at   | 12 | CSF2RB       | AV756141  | 22q13.1        |
| 212737_at   | 15 | CSH2         | AL513583  | 5q31.3-q33.1   |
| 213750_at   | 14 | CSIG         | AA928506  | 16p13.13       |
| 202329_at   | 14 | CSK          | NM_004383 | 15q23-q25      |
| 206562_s_at | 15 | CSNK1A1      | NM_001892 | 5q32           |
| 208865_at   | 15 | CSNK1A1      | BG534245  | 5q32           |
| 208866_at   | 15 | CSNK1A1      | BF510713  | 5q32           |
| 213086_s_at | 15 | CSNK1A1      | BF341845  | ---            |
| 213860_x_at | 15 | CSNK1A1      | AW268585  | 5q32           |
| 208867_s_at | 14 | CSNK1A1      | AF119911  | ---            |
| 207945_s_at | 15 | CSNK1D       | NM_001893 | 17q25          |
| 208774_at   | 15 | CSNK1D       | AV700224  | 17q25          |
| 202332_at   | 15 | CSNK1E       | NM_001894 | 22q13.1        |
| 221673_s_at | 12 | CSNK1G1L     | AB042563  | 15q22.1-q22.31 |
| 202573_at   | 15 | CSNK1G2      | AL530441  | 19p13.3        |
| 220768_s_at | 14 | CSNK1G3      | NM_004384 | 5q23           |
| 206075_s_at | 12 | CSNK2A1      | NM_001895 | 20p13          |
| 212072_s_at | 15 | CSNK2A1      | AL049761  | 20p13          |
| 212073_at   | 12 | CSNK2A1      | AI631874  | 20p13          |
| 212075_s_at | 15 | CSNK2A1      | AI161318  | 20p13          |
| 203575_at   | 15 | CSNK2A2      | NM_001896 | 16p13.3-p13.2  |
| 201390_s_at | 15 | CSNK2B       | NM_001320 | 6p21-p12       |
| 211623_s_at | 15 | CSNK2B       | M30448    | ---            |
| 204619_s_at | 15 | CSPG2        | BF590263  | 5q14.3         |
| 204620_s_at | 15 | CSPG2        | NM_004385 | 5q14.3         |
| 215646_s_at | 14 | CSPG2        | R94644    | 5q14.3         |
| 221731_x_at | 15 | CSPG2        | BF218922  | 5q14.3         |
| 209257_s_at | 10 | CSPG6        | BF795297  | 10q25          |
| 209258_s_at | 10 | CSPG6        | AI373676  | 10q25          |
| 202610_s_at | 15 | CSRP         | AF135802  | Xp11.4-p11.2   |
| 200621_at   | 15 | CSRP1        | NM_004078 | 1q32           |
| 207030_s_at | 15 | CSRP2        | NM_001321 | 12q21.1        |
| 211126_s_at | 15 | CSRP2        | U46006    | 12q21.1        |

|             |    |                     |           |               |
|-------------|----|---------------------|-----------|---------------|
| 205553_s_at | 15 | CSRP3               | NM_003476 | 11p15.1       |
| 201360_at   | 15 | CST3                | NM_000099 | 20p11.21      |
| 201201_at   | 15 | CSTB                | NM_000100 | 21q22.3       |
| 204459_at   | 12 | CSTF2               | NM_001325 | Xq22.1        |
| 212901_s_at | 10 | CSTF2T              | BF732638  | 10q11         |
| 212905_at   | 14 | CSTF2T              | AI872408  | 10q11         |
| 203947_at   | 14 | CSTF3               | NM_001326 | 11p13         |
| 32723_at    | 14 | CstF-50; CstFp50    | L02547    | 20q13.31      |
| 210854_x_at | 15 | CT1; CRTR; MGC87396 | U17986    | Xq28          |
| 218898_at   | 15 | CT120               | NM_024792 | 17p13.3       |
| 203392_s_at | 15 | CTBP1               | NM_001328 | 4p16          |
| 212863_x_at | 15 | CTBP1               | BF337195  | 4p16          |
| 213979_s_at | 13 | CTBP1               | BF984434  | 4p16          |
| 213980_s_at | 15 | CTBP1               | AA053830  | 4p16          |
| 201218_at   | 15 | CTBP2               | N23018    | 10q26.2       |
| 201219_at   | 14 | CTBP2               | AW269836  | 10q26.2       |
| 201220_x_at | 15 | CTBP2               | NM_001329 | 10q26.2       |
| 210554_s_at | 15 | CTBP2               | BC002486  | 10q26.2       |
| 210835_s_at | 15 | CTBP2               | AF222711  | 10q26.2       |
| 218923_at   | 10 | CTBS                | AW304174  | 1p22.3        |
| 218924_s_at | 11 | CTBS                | AW304174  | 1p22          |
| 202521_at   | 15 | CTCF                | NM_006565 | 16q21-q22.3   |
| 217844_at   | 15 | CTDSP1              | NM_021198 | 2q35          |
| 203445_s_at | 15 | CTDSP2              | NM_005730 | 12q13-q15     |
| 201904_s_at | 12 | CTDSPL              | BF031714  | 3p21.3        |
| 201906_s_at | 15 | CTDSPL              | NM_005808 | 3p21.3        |
| 221850_x_at | 14 | CTGLF1              | AI826075  | ---           |
| 217127_at   | 13 | CTH                 | AL354872  | 1p31.1        |
| 200764_s_at | 15 | CTNNA1              | AI826881  | 5q31          |
| 200765_x_at | 15 | CTNNA1              | NM_001903 | 5q31          |
| 202468_s_at | 15 | CTNNAL1             | NM_003798 | 9q31.2        |
| 201533_at   | 15 | CTNNB1              | NM_001904 | 3p21 /// 3p21 |
| 203081_at   | 15 | CTNNBIP1            | NM_020248 | 1p36.22       |
| 221021_s_at | 15 | CTNNBL1             | NM_030877 | 20q11.23-q12  |
| 208407_s_at | 15 | CTNND1              | NM_001331 | 11q11         |
| 208862_s_at | 15 | CTNND1              | AW073672  | 11q11         |
| 211240_x_at | 15 | CTNND1              | AB002382  | 11q11         |
| 36566_at    | 12 | CTNS                | AJ222967  | 17p13         |
| 210010_s_at | 15 | CTP; SLC20A3        | U25147    | 22q11.21      |
| 202613_at   | 15 | CTPS                | NM_001905 | 1p34.1        |
| 219080_s_at | 15 | CTPS2               | NM_019857 | Xp22          |
| 214377_s_at | 11 | CTRL                | BF508685  | 1p32.3-p31.3  |
| 200838_at   | 15 | CTSB                | NM_001908 | 8p22          |
| 200839_s_at | 15 | CTSB                | NM_001908 | 8p22          |
| 213274_s_at | 15 | CTSB                | AA020826  | 8p22          |
| 213275_x_at | 15 | CTSB                | W47179    | 8p22          |
| 201487_at   | 15 | CTSC                | NM_001814 | 11q14.1-q14.3 |
| 200766_at   | 12 | CTSD                | NM_001909 | 11p15.5       |
| 205927_s_at | 10 | CTSE                | NM_001910 | 1q31          |
| 203657_s_at | 15 | CTSF                | NM_003793 | 11q13         |

|             |    |                 |           |              |
|-------------|----|-----------------|-----------|--------------|
| 202295_s_at | 15 | CTSH            | NM_004390 | 15q24-q25    |
| 202450_s_at | 15 | CTSK            | NM_000396 | 1q21         |
| 202087_s_at | 15 | CTSL            | NM_001912 | 9q21-q22     |
| 203758_at   | 15 | CTSO            | AV729484  | 4q31-q32     |
| 201059_at   | 15 | CTTN            | NM_005231 | 11q13        |
| 214074_s_at | 12 | CTTN            | BG475299  | 11q13        |
| 219468_s_at | 10 | CUEDC1          | NM_017949 | 17q23.2      |
| 218097_s_at | 15 | CUEDC2          | NM_024040 | 10q24.32     |
| 209489_at   | 15 | CUGBP1          | N25915    | 11p11        |
| 221742_at   | 14 | CUGBP1          | AI472139  | 11p11        |
| 221743_at   | 15 | CUGBP1          | AI472139  | 11p11        |
| 202156_s_at | 15 | CUGBP2          | N36839    | 10p13        |
| 202158_s_at | 14 | CUGBP2          | N36839    | 10p13        |
| 207614_s_at | 15 | CUL1            | NM_003592 | 7q36.1       |
| 203079_s_at | 15 | CUL2            | NM_003591 | 10p11.22     |
| 201370_s_at | 14 | CUL3            | AU145232  | 2q36.3       |
| 201371_s_at | 15 | CUL3            | AU145232  | 2q36.3       |
| 201423_s_at | 15 | CUL4A           | AL037208  | 13q34        |
| 201424_s_at | 15 | CUL4A           | NM_003589 | 13q34        |
| 202213_s_at | 13 | CUL4B           | AI650819  | Xq23         |
| 202214_s_at | 15 | CUL4B           | NM_003588 | Xq23         |
| 210257_x_at | 15 | CUL4B           | AF212995  | Xq23         |
| 203531_at   | 15 | CUL5            | BF435809  | 11q22-q23    |
| 203533_s_at | 13 | CUL5            | NM_003478 | 11q22-q23    |
| 221488_s_at | 15 | CUTA; MGC111154 | AF230924  | 6pter-p21.31 |
| 218970_s_at | 15 | CUTC            | NM_015960 | 10q24.31     |
| 202367_at   | 15 | CUTL1           | NM_001913 | 7q22.1       |
| 214743_at   | 15 | CUTL1           | BE046521  | 7q22.1       |
| 203917_at   | 15 | CXADR           | NM_001338 | 21q21.1      |
| 823_at      | 15 | CXC3            | U84487    | 16q13        |
| 203666_at   | 15 | CXCL12          | NM_000609 | 10q11.1      |
| 217028_at   | 15 | CXCR4           | AJ224869  | ---          |
| 204340_at   | 13 | CXorf12         | NM_003492 | Xq28         |
| 220252_x_at | 11 | CXorf21         | NM_025159 | Xp21.3       |
| 213315_x_at | 15 | CXorf40         | L43577    | Xq28         |
| 214112_s_at | 15 | CXorf40         | AA543076  | Xq28         |
| 212961_x_at | 15 | CXorf40; EOLA1  | L43578    | Xq28         |
| 205583_s_at | 15 | CXorf45         | NM_024810 | Xq23         |
| 205584_at   | 12 | CXorf45         | NM_024810 | Xq23         |
| 221196_x_at | 11 | CXorf53         | NM_024332 | Xq28         |
| 205088_at   | 14 | CXorf6          | NM_005491 | Xq28         |
| 204923_at   | 15 | CXorf9          | AL023653  | Xq26         |
| 201828_x_at | 15 | CXX1            | NM_003928 | Xq26         |
| 217948_at   | 14 | CXX1            | NM_015582 | Xq26.3       |
| 48580_at    | 15 | CXXC1           | U55777    | 18q12        |
| 207843_x_at | 15 | CYB5            | NM_001914 | 18q23        |
| 215726_s_at | 15 | CYB5            | M22976    | 18q23        |
| 207986_x_at | 15 | CYB561          | NM_001915 | 17q11-qter   |
| 210816_s_at | 10 | CYB561          | BC000021  | 17q11-qter   |
| 201633_s_at | 14 | CYB5-M          | AW235051  | 16q22.1      |

|             |    |                      |           |                   |
|-------------|----|----------------------|-----------|-------------------|
| 201634_s_at | 13 | CYB5-M               | NM_030579 | 16q22.1           |
| 202263_at   | 15 | CYB5R1               | NM_016243 | 1p36.13-q41       |
| 201885_s_at | 15 | CYB5R3               | NM_000398 | 22q13.31-qter     |
| 219079_at   | 14 | CYB5R4               | NM_016230 | 6pter-q22.33      |
| 203028_s_at | 13 | CYBA                 | NM_000101 | 16q24             |
| 203922_s_at | 12 | CYBB                 | AI308863  | Xp21.1            |
| 203923_s_at | 11 | CYBB                 | AI308863  | Xp21.1            |
| 210131_x_at | 15 | CYBL                 | D49737    | 1q21              |
| 201066_at   | 15 | CYC1                 | NM_001916 | 8q24.3            |
| 208905_at   | 15 | CYCS                 | BC005299  | 7p15.2            |
| 208923_at   | 15 | CYFIP1               | BC005097  | 15q11             |
| 215785_s_at | 15 | CYFIP2               | AL161999  | 5q33.3            |
| 220999_s_at | 12 | CYFIP2               | NM_030778 | 5q33.3 /// 5q33.3 |
| 213072_at   | 13 | CYHR1                | AI928387  | 8q24.3            |
| 213681_at   | 14 | CYHR1                | AW512817  | ---               |
| 213295_at   | 15 | CYLD                 | AA555096  | 16q12-q13         |
| 39582_at    | 12 | CYLD                 | AL050166  | 16q12-q13         |
| 207063_at   | 10 | CYorf14              | NM_018542 | Yq11.222          |
| 208993_s_at | 15 | CYP; SRCyp; CARS-Cyp | U40763    | 2q31.1            |
| 207608_x_at | 13 | CYP1A2               | NM_000761 | 15q22-qter        |
| 202435_s_at | 10 | CYP1B1               | AU154504  | 2p21              |
| 202436_s_at | 15 | CYP1B1               | AU144855  | 2p21              |
| 202437_s_at | 15 | CYP1B1               | NM_000104 | 2p21              |
| 219565_at   | 10 | CYP20A1              | NM_020674 | 2q33.3            |
| 216025_x_at | 13 | CYP2C                | M21940    | 10q24             |
| 214421_x_at | 12 | CYP2C9               | AV652420  | 10q24             |
| 217558_at   | 10 | CYP2C9               | BE971373  | 10q24             |
| 205073_at   | 15 | CYP2J2               | NM_000775 | 1p31.3-p31.2      |
| 210502_s_at | 15 | CYP-33               | AF042386  | 1p32              |
| 220432_s_at | 12 | CYP39A1              | NM_016593 | 6p21.1-p11.2      |
| 202314_at   | 15 | CYP51A1              | NM_000786 | 7q21.2-q21.3      |
| 216607_s_at | 15 | CYP51P2              | U40053    | ---               |
| 207386_at   | 10 | CYP7B1               | NM_004820 | 8q21.3            |
| 208928_at   | 12 | CYPOR                | AF258341  | 7q11.2            |
| 201289_at   | 15 | CYR61                | NM_001554 | 1p31-p22          |
| 210764_s_at | 15 | CYR61                | AF003114  | 1p31-p22          |
| 212527_at   | 15 | D15Wsu75e            | BF057059  | 22q13.2           |
| 212528_at   | 10 | D15Wsu75e            | AI348009  | ---               |
| 212012_at   | 15 | D2S448               | BF342851  | 2p25              |
| 212013_at   | 15 | D2S448               | D86983    | 2p25              |
| 209569_x_at | 15 | D4S234E              | BC001745  | 4p16.3            |
| 208812_x_at | 15 | D6S204               | BC004489  | 6p21.3            |
| 216526_x_at | 15 | D6S204               | AK024836  | 6p21.3            |
| 216060_s_at | 15 | DAAM1                | AK021890  | 14q23.1           |
| 212793_at   | 14 | DAAM2                | BF513244  | 6p21.1            |
| 201278_at   | 15 | DAB2                 | N21202    | ---               |
| 201279_s_at | 13 | DAB2                 | BC003064  | 5p13              |
| 201280_s_at | 15 | DAB2                 | NM_001343 | 5p13              |
| 210757_x_at | 15 | DAB2                 | AF188298  | 5p13              |
| 221519_at   | 15 | DAC                  | AF281859  | 10q24             |

|             |    |            |           |               |
|-------------|----|------------|-----------|---------------|
| 205471_s_at | 15 | DACH1      | NM_004392 | 13q22         |
| 219179_at   | 15 | DACT1      | NM_016651 | 14q23.1       |
| 200046_at   | 15 | DAD1       | NM_001344 | 14q11-q12     |
| 201925_s_at | 15 | DAF        | NM_000574 | 1q32          |
| 201926_s_at | 15 | DAF        | BC001288  | 1q32          |
| 205417_s_at | 15 | DAG1       | NM_004393 | 3p21          |
| 221934_s_at | 15 | DALRD3     | BF941492  | 3p21.31       |
| 206878_at   | 10 | DAO        | NM_001917 | 12q24         |
| 201095_at   | 15 | DAP        | NM_004394 | 5p15.2        |
| 38703_at    | 15 | DAP; ASPEP | AF005050  | 2q36.1        |
| 208822_s_at | 15 | DAP-3      | U18321    | 1q21-q22      |
| 209323_at   | 15 | DAP4       | AF081567  | 11q13.5       |
| 203139_at   | 15 | DAPK1      | NM_004938 | 9q34.1        |
| 203890_s_at | 12 | DAPK3      | BF686824  | 19p13.3       |
| 203891_s_at | 15 | DAPK3      | NM_001348 | 19p13.3       |
| 201623_s_at | 15 | DARS       | BC000629  | 2q22.1        |
| 201624_at   | 15 | DARS       | NM_001349 | 2q22.1        |
| 218365_s_at | 13 | DARS2      | NM_018122 | 1q24.2        |
| 213213_at   | 15 | DATF1      | AL035669  | ---           |
| 201763_s_at | 15 | DAXX       | NM_001350 | 6p21.3        |
| 218443_s_at | 15 | DAZAP1     | NM_018959 | 19p13.3       |
| 200794_x_at | 15 | DAZAP2     | NM_014764 | 2q33.2        |
| 212595_s_at | 15 | DAZAP2     | AL534321  | 2q33.2        |
| 214334_x_at | 15 | DAZAP2     | N34846    | 2q33.2        |
| 204244_s_at | 12 | DBF4       | NM_006716 | 7q21.3        |
| 202428_x_at | 15 | DBI        | NM_020548 | 2q12-q21      |
| 202806_at   | 15 | DBN1       | NM_004395 | 5q35.3        |
| 217025_s_at | 15 | DBN1       | AL110225  | 5q35.3        |
| 201386_s_at | 15 | DBP1       | AF279891  | 4p15.3        |
| 214988_s_at | 15 | DBP-5      | X63071    | 21q22.1-q22.2 |
| 205370_x_at | 15 | DBT        | NM_001918 | 1p31          |
| 201677_at   | 15 | DC12       | AI937543  | 3q21.3        |
| 201678_s_at | 14 | DC12       | AI937543  | 3q21.3        |
| 218447_at   | 15 | DC13       | NM_020188 | 16q23.2       |
| 203299_s_at | 15 | DC22       | AF251295  | Xp22.31       |
| 221570_s_at | 15 | DC3        | AF201938  | 2q31.1        |
| 209484_s_at | 15 | DC8        | AF201941  | 1q41          |
| 205399_at   | 11 | DCAMKL1    | NM_004734 | 13q13-q14.1   |
| 222101_s_at | 15 | DCHS1      | BF222893  | 11p15.4       |
| 209759_s_at | 15 | DCI        | BC002746  | 16p13.3       |
| 203302_at   | 15 | DCK        | NM_000788 | 4q13.3-q21.1  |
| 219678_x_at | 15 | DCLRE1C    | NM_022487 | 10p13         |
| 201894_s_at | 15 | DCN        | NM_001920 | 12q13.2       |
| 209335_at   | 15 | DCN        | BC005322  | 12q13.2       |
| 218508_at   | 14 | DCP1A      | NM_018403 | 3p21.31       |
| 212919_at   | 15 | DCP2       | AV715578  | 5q22.3        |
| 218774_at   | 13 | DCPS       | NM_014026 | 11q24.2       |
| 208661_s_at | 15 | DCRR1      | D84294    | 21q22.2       |
| 210645_s_at | 15 | DCRR1      | D83077    | 21q22.2       |
| 203124_s_at | 15 | DCT1       | AF046997  | 12q13         |

|             |    |         |           |                     |
|-------------|----|---------|-----------|---------------------|
| 201571_s_at | 15 | DCTD    | AI656493  | 4q35.1              |
| 201572_x_at | 15 | DCTD    | NM_001921 | 4q35.1              |
| 210137_s_at | 15 | DCTD    | BC001286  | 4q35.1              |
| 201082_s_at | 15 | DCTN1   | NM_004082 | 2p13                |
| 211780_x_at | 11 | DCTN1   | BC006163  | 2p13 /// 2p13       |
| 200932_s_at | 15 | DCTN2   | NM_006400 | 12q13.2-q13.3       |
| 204246_s_at | 15 | DCTN3   | NM_007234 | 9p13                |
| 218013_x_at | 11 | DCTN4   | NM_016221 | 5q31-q32            |
| 209232_s_at | 15 | DCTN5   | BC004191  | 16p12.3             |
| 203261_at   | 15 | DCTN6   | NM_006571 | 8p12-p11            |
| 218583_s_at | 15 | DCUN1D1 | NM_020640 | 3q26.3              |
| 219116_s_at | 15 | DCUN1D2 | NM_018185 | 13q34               |
| 217973_at   | 15 | DCXR    | NM_016286 | 17q25.3             |
| 211653_x_at | 15 | DD      | M33376    | 10p15-p14           |
| 218260_at   | 13 | DDA1    | NM_024050 | 19p13.12            |
| 201896_s_at | 15 | DDA3    | BC001425  | 1q21.2              |
| 209094_at   | 15 | DDAH1   | AL078459  | 1p22                |
| 202262_x_at | 15 | DDAH2   | NM_013974 | 6p21.3              |
| 215537_x_at | 15 | DDAH2   | AJ012008  | 6p21.3              |
| 203409_at   | 13 | DDB2    | NM_000107 | 11p12-p11           |
| 221039_s_at | 13 | DDEF1   | NM_018482 | 8q24.1-q24.2        |
| 206414_s_at | 15 | DDEF2   | NM_003887 | 2p25                |
| 209383_at   | 10 | DDIT3   | BC003637  | 12q13.2             |
| 202887_s_at | 15 | DDIT4   | NM_019058 | 10pter-q26.12       |
| 208674_x_at | 15 | DDOST   | D29643    | 1p36.1              |
| 208675_s_at | 15 | DDOST   | D29643    | 1p36.1              |
| 207169_x_at | 15 | DDR1    | NM_001954 | 6p21.3              |
| 202929_s_at | 15 | DDT     | NM_001355 | 22q11.23            |
| 201241_at   | 15 | DDX1    | NM_004939 | 2p24                |
| 204977_at   | 15 | DDX10   | NM_004398 | 11q22-q23           |
| 208149_x_at | 10 | DDX11   | NM_030653 | 12p11 /// 12p11     |
| 213378_s_at | 11 | DDX11   | AI983033  | 12p13.31            |
| 208151_x_at | 15 | DDX17   | NM_030881 | 22q13.1 /// 22q13.1 |
| 208718_at   | 15 | DDX17   | Z97056    | 22q13.1             |
| 213998_s_at | 13 | DDX17   | AW188131  | 22q13.1             |
| 205763_s_at | 15 | DDX18   | NM_006773 | 2q14.2              |
| 208895_s_at | 15 | DDX18   | BG530850  | 2q14.2              |
| 208897_s_at | 15 | DDX18   | BG530850  | 2q14.2              |
| 202577_s_at | 13 | DDX19A  | BC005162  | 16q22.1             |
| 208152_s_at | 15 | DDX21   | NM_004728 | 10q21 /// 10q21     |
| 200694_s_at | 15 | DDX24   | NM_020414 | 14q32               |
| 200702_s_at | 13 | DDX24   | BG421209  | 14q32               |
| 218819_at   | 14 | DDX26   | NM_012141 | 13q14.12-q14.2      |
| 222239_s_at | 15 | DDX26   | AL117626  | 13q14.12-q14.2      |
| 219108_x_at | 13 | DDX27   | NM_017895 | 20q13.13            |
| 40255_at    | 12 | DDX28   | AC004531  | ---                 |
| 212648_at   | 15 | DDX29   | AL079292  | 5q11.2              |
| 212649_at   | 11 | DDX29   | AL079292  | 5q11.2              |
| 211787_s_at | 15 | DDX2A   | BC006210  | 17p13 /// 17p13     |
| 212674_s_at | 15 | DDX30   | AK002076  | 3p21.31             |

|             |    |                  |           |               |
|-------------|----|------------------|-----------|---------------|
| 201584_s_at | 15 | DDX39            | NM_005804 | 19p13.13      |
| 201210_at   | 15 | DDX3X            | NM_001356 | Xp11.3-p11.23 |
| 212514_x_at | 14 | DDX3X            | R60068    | Xp11.3-p11.23 |
| 212515_s_at | 15 | DDX3X            | BG492602  | Xp11.3-p11.23 |
| 205000_at   | 10 | DDX3Y            | NM_004660 | Yq11          |
| 217840_at   | 15 | DDX41            | NM_016222 | 5q35.3        |
| 201788_at   | 15 | DDX42            | NM_007372 | 17q24.2       |
| 220890_s_at | 15 | DDX47            | NM_016355 | 12p13.2       |
| 201303_at   | 15 | DDX48            | NM_014740 | 17q25.3       |
| 31807_at    | 15 | DDX49            | AC002985  | 19p12         |
| 200033_at   | 15 | DDX5             | NM_004396 | 17q21         |
| 213637_at   | 14 | DDX52            | BE503392  | ---           |
| 219111_s_at | 14 | DDX54            | NM_024072 | 12q24.21      |
| 217754_at   | 14 | DDX56            | NM_019082 | 7p13          |
| 202906_s_at | 13 | DECR; NADPH      | AF049895  | 8q21          |
| 202447_at   | 15 | DECR1            | NM_001359 | 8q21.3        |
| 219664_s_at | 14 | DECR2            | NM_020664 | 16p13.3       |
| 209165_at   | 14 | DED; CHE1; CHE-1 | AF083208  | 17q11.2-q12   |
| 202480_s_at | 14 | DEDD             | NM_004216 | 1q23.1        |
| 205033_s_at | 15 | DEFA1            | NM_004084 | 8p23.2-p23.1  |
| 207269_at   | 14 | DEFA4            | NM_001925 | 8p23          |
| 211255_x_at | 10 | DEFT             | AF064605  | 1q23.1        |
| 215158_s_at | 15 | DEFT             | AK022531  | 1q23.1        |
| 207431_s_at | 15 | DEGS1            | NM_003676 | 1q42.12       |
| 209250_at   | 15 | DEGS1            | BC000961  | 1q42.12       |
| 200934_at   | 15 | DEK              | NM_003472 | 6p23          |
| 200047_s_at | 15 | DELTA            | Z14077    | 14q           |
| 201901_s_at | 15 | DELTA            | Z14077    | 14q           |
| 220295_x_at | 13 | DEPDC1           | NM_017779 | 1p31.2        |
| 218858_at   | 11 | DEPDC6           | NM_022783 | 8q24.12       |
| 218102_at   | 15 | DERA             | NM_015954 | 12p13.1       |
| 218172_s_at | 15 | DERL1            | NM_018630 | 8q24.13       |
| 219402_s_at | 15 | DERL1            | NM_024295 | 8q24.13       |
| 218333_at   | 15 | DERL2            | NM_016041 | ---           |
| 219260_s_at | 14 | DERP6            | NM_015362 | 17p13.2       |
| 202222_s_at | 15 | DES              | NM_001927 | 2q35          |
| 214027_x_at | 15 | DES              | AA889653  | 2q35          |
| 209146_at   | 15 | DESP4            | U93162    | 4q32-q34      |
| 219641_at   | 15 | DET1             | NM_017996 | 15q25.3       |
| 203733_at   | 15 | DEXI             | NM_014015 | 16p13.2       |
| 203277_at   | 15 | DFFA             | NM_004401 | 1p36.3-p36.2  |
| 203695_s_at | 15 | DFNA5            | NM_004403 | 7p15          |
| 203669_s_at | 15 | DGAT1            | NM_012079 | 8q24.3        |
| 214198_s_at | 14 | DGCR2            | AU150824  | 22q11.21      |
| 208024_s_at | 15 | DGCR6            | NM_005675 | 22q11.21      |
| 203385_at   | 15 | DGKA             | NM_001345 | 12q13.3       |
| 208072_s_at | 15 | DGKD             | NM_003648 | 2q37.1        |
| 206806_at   | 15 | DGKI             | NM_004717 | 7q32.3-q33    |
| 207556_s_at | 14 | DGKZ             | NM_003646 | 11p11.2       |
| 203816_at   | 13 | DGUOK            | NM_001929 | 2p13          |

|             |    |               |           |               |
|-------------|----|---------------|-----------|---------------|
| 209549_s_at | 15 | DGUOK         | BC001121  | 2p13          |
| 200862_at   | 10 | DHCR24        | NM_014762 | 1p33-p31.1    |
| 201791_s_at | 12 | DHCR7         | NM_001360 | 11q13.2-q13.5 |
| 202532_s_at | 14 | DHFR          | NM_000791 | 5q11.2-q13.2  |
| 202534_x_at | 15 | DHFR          | NM_000791 | 5q11.2-q13.2  |
| 48808_at    | 14 | DHFR          | AI144299  | 5q11.2-q13.2  |
| 209619_at   | 15 | DHLAG         | K01144    | 5q32          |
| 213632_at   | 12 | DHOdehase     | M94065    | 16q22         |
| 202802_at   | 15 | DHPS          | NM_001930 | 19p13.2-p13.1 |
| 207831_x_at | 15 | DHPS          | NM_013407 | 19p13.2-p13.1 |
| 213279_at   | 15 | DHRS1         | AL050217  | 14q11.2       |
| 202481_at   | 15 | DHRS3         | NM_004753 | 1p36.1        |
| 218021_at   | 15 | DHRS4         | NM_021004 | 14q11.2       |
| 218285_s_at | 15 | DHRS6         | NM_020139 | 4q24          |
| 217989_at   | 15 | DHRS8         | NM_016245 | 4q22.1        |
| 209916_at   | 12 | DHTKD1        | BC002477  | 10p14         |
| 201385_at   | 15 | DHX15         | NM_001358 | 4p15.3        |
| 203694_s_at | 15 | DHX16         | NM_003587 | 6p21.3        |
| 204355_at   | 14 | DHX30         | NM_014966 | 3p21.31       |
| 218198_at   | 15 | DHX32         | NM_018180 | 10q26.2       |
| 218277_s_at | 15 | DHX40         | BF431360  | 17q23.2       |
| 202420_s_at | 15 | DHX9          | NM_001357 | 1q25          |
| 219350_s_at | 15 | DIABLO        | NM_019887 | 12q24.31      |
| 205603_s_at | 12 | DIAPH2        | NM_007309 | Xq22          |
| 205726_at   | 15 | DIAPH2        | NM_006729 | Xq22          |
| 206061_s_at | 15 | DICER1        | NM_030621 | 14q32.2       |
| 212888_at   | 14 | DICER1        | BG109746  | 14q32.2       |
| 213229_at   | 15 | DICER1        | BF590131  | 14q32.2       |
| 221471_at   | 15 | Diff33        | U49188    | 20q13.1-13.3  |
| 221472_at   | 15 | Diff33        | U49188    | 20q13.1-13.3  |
| 221473_x_at | 15 | Diff33        | U49188    | 20q13.1-13.3  |
| 210052_s_at | 10 | DIL2          | AF098158  | 20q11.2       |
| 218218_at   | 15 | DIP13B        | NM_018171 | 12q24.1       |
| 204610_s_at | 15 | DIPA          | NM_006848 | 11q12.1       |
| 221579_s_at | 15 | DIPP; DIPP1   | AF062530  | 6p21.2        |
| 206090_s_at | 15 | DISC1         | NM_018662 | 1q42.1        |
| 214724_at   | 10 | DIXDC1        | AF070621  | ---           |
| 221311_x_at | 13 | DJ122O8.2     | NM_020466 | 6q14.2-q16.1  |
| 205002_at   | 14 | DJ159A19.3    | NM_015699 | 1p36.13       |
| 217256_x_at | 15 | dJ507I15.1    | Z98950    | ---           |
| 201580_s_at | 15 | DJ971N18.2    | AL544094  | 20p12         |
| 201581_at   | 15 | DJ971N18.2    | AL544094  | 20p12         |
| 201479_at   | 15 | DKC1          | NM_001363 | Xq28          |
| 221541_at   | 15 | DKFZP434B044  | AL136861  | 16q24.1       |
| 212886_at   | 15 | DKFZP434C171  | AL080169  | 5q33.1        |
| 212804_s_at | 15 | DKFZP434C212  | AI797397  | 9q34.11       |
| 212132_at   | 15 | DKFZP434D1335 | AL117499  | 19q13.12      |
| 221245_s_at | 14 | DKFZP434E2135 | NM_030804 | ---           |
| 221535_at   | 15 | DKFZp434E248  | AL136897  | 3q29          |
| 221536_s_at | 15 | DKFZp434E248  | AL136897  | 3q29          |



|             |    |               |           |              |    |
|-------------|----|---------------|-----------|--------------|----|
| 221031_s_at | 15 | DKFZP434F0318 | NM_030817 | 12p13.2      |    |
| 214679_x_at | 15 | DKFZp434J194  | AL110227  | 19p13.3      |    |
| 212228_s_at | 15 | DKFZP434K046  | AC004382  | 16q13        |    |
| 221522_at   | 15 | DKFZP434L0718 | AL136784  | 19q13.12     |    |
| 219872_at   | 10 | DKFZp434L142  | NM_016613 | 4q32.1       |    |
| 213701_at   | 15 | DKFZp434N2030 | AW299245  | 12q21.33     |    |
| 212505_s_at | 14 | DKFZp434P101  | AL110250  | 19p13.11     |    |
| 213737_x_at | 15 | DKFZp434P162  | AI620911  | ---          |    |
| 212300_at   | 12 | DKFZp451J0118 | AL049795  | 1p34.3       |    |
| 213657_s_at | 13 | DKFZp547K1113 | BE858194  | 15q26.1      |    |
| 213658_at   | 15 | DKFZp547K1113 | BE858194  | 15q26.1      |    |
| 37590_g_at  | 14 | DKFZp547K1113 | AL109698  | 15q26.1      |    |
| 216028_at   | 13 | DKFZP564C152  | AL049980  |              | 11 |
| 52078_at    | 15 | DKFZP564D0478 | AI828080  | 1p35.3       |    |
| 212123_at   | 15 | DKFZP564D116  | AL050022  | 10q24.1      |    |
| 212936_at   | 15 | DKFZP564D172  | AI927701  | 5q15         |    |
| 212333_at   | 15 | DKFZp564F0522 | AL049943  | 2p23.1       |    |
| 212202_s_at | 15 | DKFZP564G2022 | BG493972  | 15q14        |    |
| 212204_at   | 15 | DKFZp564G2022 | AL049944  | 15q14        |    |
| 212893_at   | 14 | DKFZp564I052  | AL080063  | 1p31.1       |    |
| 209596_at   | 15 | DKFZp564I1922 | AF245505  | Xp22.33      |    |
| 209177_at   | 15 | DKFZP564J0123 | BC002873  | 3p21.31      |    |
| 217794_at   | 11 | DKFZP564J157  | NM_018457 | 12q12        |    |
| 221553_at   | 12 | DKFZp564K142  | AL136636  | Xq13.3       |    |
| 210596_at   | 12 | DKFZp564K142  | AF130104  | Xq13.3       |    |
| 204218_at   | 15 | DKFZP564M082  | NM_014042 | 11q13.3      |    |
| 212018_s_at | 15 | DKFZP564M182  | AK025446  | 16p13.13     |    |
| 221596_s_at | 14 | DKFZp564O0523 | AL136619  | 7q21.3       |    |
| 204687_at   | 15 | DKFZP564O0823 | NM_015393 | 4q13.3-q21.3 |    |
| 212002_at   | 14 | DKFZp566C0424 | BG171020  | 1p36.13      |    |
| 212004_at   | 15 | DKFZp566C0424 | AL050028  | 1p36.13      |    |
| 215172_at   | 13 | DKFZP566K0524 | AL050040  | 10q11.22     |    |
| 217713_x_at | 15 | DKFZP566N034  | AA126763  | ---          |    |
| 207761_s_at | 15 | DKFZP586A0522 | NM_014033 | 12q13.13     |    |
| 209703_x_at | 14 | DKFZP586A0522 | BC004492  | 12q13.13     |    |
| 213861_s_at | 15 | DKFZP586D0919 | N67741    | 12q13.2      |    |
| 221636_s_at | 15 | DKFZp586G2122 | AL136931  | 1q42.11      |    |
| 209760_at   | 11 | DKFZp586H1322 | AL136932  | 4q31.3       |    |
| 213661_at   | 12 | DKFZP586H2123 | AI671186  | 11p13        |    |
| 213546_at   | 11 | DKFZp586I1420 | AL050378  | 7p15.1       |    |
| 212212_s_at | 15 | DKFZP586J0619 | BF055496  | 7p22.3       |    |
| 221970_s_at | 15 | DKFZP586L0724 | AU158148  | 17q24.3      |    |
| 36552_at    | 12 | DKFZp586P0123 | AL080220  | 11q13.3      |    |
| 213189_at   | 15 | DKFZp667G2110 | AI823896  | ---          |    |
| 54970_at    | 14 | DKFZp761I2123 | AA868332  | 7p13         |    |
| 204602_at   | 12 | DKK1          | NM_012242 | 10q11.2      |    |
| 219908_at   | 12 | DKK2          | NM_014421 | 4q25         |    |
| 202196_s_at | 15 | DKK3          | NM_013253 | 11p15.2      |    |
| 214247_s_at | 15 | DKK3          | AU148057  | 11p15.2      |    |
| 211150_s_at | 13 | DLAT          | J03866    | ---          |    |

|             |    |          |           |                 |
|-------------|----|----------|-----------|-----------------|
| 212568_s_at | 15 | DLAT     | BF978872  | 11q23.1         |
| 213149_at   | 15 | DLAT     | AW299740  | 11q23.1         |
| 220511_s_at | 13 | DLC1     | NM_024767 | 8p22            |
| 220512_at   | 11 | DLC1     | NM_024767 | 8p22            |
| 205677_s_at | 15 | DLEU1    | NM_005887 | 13q14.3         |
| 202516_s_at | 10 | DLG1     | NM_004087 | 3q29            |
| 212729_at   | 15 | DLG3     | AI916274  | Xq13.1          |
| 201681_s_at | 15 | DLG5     | AB011155  | 10q23           |
| 203764_at   | 15 | DLG7     | NM_014750 | 14q22.2         |
| 202572_s_at | 15 | DLGAP4   | NM_014902 | 20q11.23        |
| 209560_s_at | 15 | dlk      | U15979    | 14q32           |
| 217066_s_at | 12 | DM       | M87313    | 19q13.3         |
| 208250_s_at | 10 | DMBT1    | NM_004406 | 10q25.3-q26.1   |
| 208386_x_at | 15 | DMC1     | NM_007068 | 22q13.1         |
| 203881_s_at | 15 | DMD      | NM_004010 | Xp21.2          |
| 207660_at   | 12 | DMD      | NM_004019 | Xp21.2          |
| 208086_s_at | 11 | DMD      | M92650    | Xp21.2          |
| 37996_s_at  | 15 | DMPK     | L08835    | 19q13.3         |
| 203301_s_at | 15 | DMTF1    | NM_021145 | 7q21            |
| 33768_at    | 15 | DMWD     | L19267    | 19q13.3         |
| 203791_at   | 15 | DMXL1    | NM_005509 | 5q22            |
| 220725_x_at | 10 | DNAH3    | NM_025095 | 16p13.11-p12.3  |
| 200880_at   | 15 | DNAJA1   | AL534104  | 9p13-p12        |
| 200881_s_at | 15 | DNAJA1   | AL534104  | 9p13-p12        |
| 205963_s_at | 15 | DNAJA3   | NM_005147 | 16p13.3         |
| 200664_s_at | 14 | DNAJB1   | NM_006145 | 19p13.2         |
| 200666_s_at | 15 | DNAJB1   | NM_006145 | 19p13.2         |
| 202867_s_at | 15 | DNAJB12  | NM_017626 | 10q22.2         |
| 219237_s_at | 12 | DNAJB14  | NM_024920 | 4q23            |
| 202500_at   | 15 | DNAJB2   | NM_006736 | 2q32-q34        |
| 203810_at   | 15 | DNAJB4   | BG252490  | 1p31.1          |
| 203811_s_at | 14 | DNAJB4   | NM_007034 | 1p31.1          |
| 209015_s_at | 15 | DNAJB6   | BC002446  | 7q36.3          |
| 202842_s_at | 15 | DNAJB9   | AL080081  | 7q31            |
| 202843_at   | 14 | DNAJB9   | NM_012328 | 7q31            |
| 218409_s_at | 11 | DNAJC1   | NM_022365 | 10p12.33-p12.32 |
| 221781_s_at | 12 | DNAJC10  | BG168666  | 2q32.1          |
| 221782_at   | 15 | DNAJC10  | BG168666  | 2q32.1          |
| 218435_at   | 15 | DNAJC15  | NM_013238 | 13q14.1         |
| 206782_s_at | 14 | DNAJC4   | NM_005528 | 11q13           |
| 213919_at   | 13 | DNAJC4   | AW024467  | 11q13           |
| 204720_s_at | 15 | DNAJC6   | AV729634  | 1pter-q31.3     |
| 202416_at   | 15 | DNAJC7   | NM_003315 | 17q11.2         |
| 205545_x_at | 15 | DNAJC8   | NM_014280 | 1p35.2          |
| 212491_s_at | 15 | DNAJC8   | AA843895  | 1p35.2          |
| 213088_s_at | 15 | DNAJC9   | BE551340  | 10q22.3         |
| 204008_at   | 15 | DNAL4    | NM_005740 | 22q13.1         |
| 208694_at   | 15 | DNA-PKcs | U47077    | 8q11            |
| 222154_s_at | 15 | DNAPTP6  | AK002064  | 2q33.2          |
| 203912_s_at | 14 | DNASE1L1 | NM_006730 | Xq28            |

|             |    |           |           |                     |
|-------------|----|-----------|-----------|---------------------|
| 211928_at   | 15 | DNCH1     | AB002323  | 14q32.3-qter        |
| 219469_at   | 10 | DNCH2     | NM_024606 | 11q21-q22.1         |
| 57739_at    | 14 | DND1      | AI949010  | 5q31.3              |
| 209157_at   | 15 | DNJ3/CPR3 | AF011793  | 16q11.1-q11.2       |
| 203105_s_at | 15 | DNM1L     | NM_012062 | 12p11.21            |
| 201697_s_at | 12 | DNMT1     | NM_001379 | 19p13.2             |
| 201937_s_at | 12 | DNPEP     | NM_012100 | 2q36.1              |
| 217604_at   | 15 | DNPEP     | AI086530  | ---                 |
| 202776_at   | 15 | DNTTIP2   | NM_014597 | 1p22.1              |
| 204135_at   | 15 | DOC1      | NM_014890 | 3q12.3              |
| 203187_at   | 15 | DOCK1     | NM_001380 | 10q26.13-q26.3      |
| 205003_at   | 15 | DOCK4     | NM_014705 | 7q31.1              |
| 221794_at   | 15 | DOCK6     | AI198543  | 19p13.2             |
| 55583_at    | 14 | DOCK6     | AI198543  | 19p13.2             |
| 212538_at   | 15 | DOCK9     | AL576253  | 13q32.3             |
| 214263_x_at | 15 | DOK4      | AI192781  | 16q13               |
| 214844_s_at | 15 | DOK5      | AL050069  | 20q13.2             |
| 221677_s_at | 15 | DONSON    | AF232674  | 21q22.1             |
| 209509_s_at | 15 | DPAGT1    | BC000325  | 11q23.3             |
| 211302_s_at | 15 | DPDE4     | L20966    | 1p31                |
| 202116_at   | 15 | DPF2      | NM_006268 | 11q13               |
| 219746_at   | 15 | DPF3      | NM_012074 | 14q24.3-q31.1       |
| 202632_at   | 14 | DPH1      | NM_001383 | --- /// ---         |
| 222041_at   | 15 | DPH2L1    | BG235929  | ---                 |
| 213853_at   | 15 | Dph4      | AL050199  | ---                 |
| 219590_x_at | 15 | DPH5      | NM_015958 | 1p21.2              |
| 202673_at   | 15 | DPM1      | NM_003859 | 20q13.13            |
| 219373_at   | 15 | DPM3      | NM_018973 | 1q22                |
| 220939_s_at | 15 | DPP8      | NM_017743 | 15q22               |
| 207977_s_at | 15 | DPT       | NM_001937 | 1q12-q23            |
| 213068_at   | 15 | DPT       | AI146848  | 1q12-q23            |
| 213071_at   | 15 | DPT       | AL049798  | 1q12-q23            |
| 204646_at   | 15 | DPYD      | NM_000110 | 1p22                |
| 200762_at   | 15 | DPYSL2    | NM_001386 | 8p22-p21            |
| 201431_s_at | 15 | DPYSL3    | NM_001387 | 5q32                |
| 205493_s_at | 15 | DPYSL4    | NM_006426 | 10q26               |
| 207654_x_at | 15 | DR1       | NM_001938 | 1p22.1              |
| 209187_at   | 15 | DR1       | AW516932  | 1p22.1              |
| 209188_x_at | 15 | DR1       | AW516932  | 1p22.1              |
| 216652_s_at | 15 | DR1       | AL137673  | 1p22.1              |
| 209295_at   | 15 | DR5       | AF016266  | 8p22-p21            |
| 203258_at   | 15 | DRAP1     | NM_006442 | 11q13.3             |
| 208931_s_at | 15 | DRBF      | AF147209  | 19p13.2             |
| 211375_s_at | 15 | DRBF      | AF141870  | 19p13.2             |
| 206590_x_at | 12 | DRD2      | NM_016574 | 11q23               |
| 208486_at   | 14 | DRD5      | NM_000798 | 4p16.1              |
| 221985_at   | 15 | DRE1      | AW006750  | 3q27.3              |
| 221986_s_at | 15 | DRE1      | AW006750  | 3q27.3              |
| 217868_s_at | 15 | DREV1     | BC000195  | 16p13-p12           |
| 202810_at   | 15 | DRG1      | NM_004147 | 22q12.2 /// 22q12.2 |

|             |    |            |           |               |
|-------------|----|------------|-----------|---------------|
| 221517_s_at | 15 | DRIP80     | AF105421  | 11q14         |
| 221643_s_at | 12 | DRPLA      | AF016005  | 1p36.1-p36.2  |
| 204751_x_at | 12 | DSC2       | NM_004949 | 18q12.1       |
| 206032_at   | 13 | DSC3       | AI797281  | 18q12.1       |
| 206033_s_at | 10 | DSC3       | NM_001941 | 18q12.1       |
| 208370_s_at | 15 | DSCR1      | NM_004414 | 21q22.1-q22.2 |
| 215253_s_at | 11 | DSCR1      | AL049369  | 21q22.1-q22.2 |
| 203498_at   | 15 | DSCR1L1    | NM_005822 | 6p21.1        |
| 203405_at   | 15 | DSCR2      | NM_003720 | 21q22.3       |
| 203635_at   | 15 | DSCR3      | NM_006052 | 21q22.2       |
| 221689_s_at | 15 | DSCR5b     | AB035745  | 21q22.2       |
| 217901_at   | 15 | DSG2       | NM_001943 | 18q12.1       |
| 208763_s_at | 15 | DSIPI      | AL110191  | Xq22.3        |
| 200606_at   | 15 | DSP        | NM_004415 | 6p24          |
| 212253_x_at | 12 | DST        | BG253119  | 6p12-p11      |
| 212254_s_at | 15 | DST        | AI798790  | 6p12-p11      |
| 215016_x_at | 15 | DST        | BC004912  | 6p12-p11      |
| 201021_s_at | 15 | DSTN       | BF697964  | 20p11.23      |
| 201022_s_at | 15 | DSTN       | BF697964  | 20p11.23      |
| 213079_at   | 15 | DT1P1A10   | AA223871  | Xp11.22       |
| 205741_s_at | 15 | DTNA       | NM_001392 | 18q12         |
| 210611_s_at | 13 | DTNA       | U26744    | 18q12         |
| 38037_at    | 15 | DTR        | M60278    | 5q23          |
| 200035_at   | 15 | DULLARD    | NM_015343 | 17p13         |
| 217912_at   | 14 | DUS1L      | NM_022156 | 17q25.3       |
| 209457_at   | 15 | DUSP; HVH3 | U16996    | 10q25         |
| 201041_s_at | 15 | DUSP1      | NM_004417 | 5q34          |
| 221563_at   | 14 | DUSP10     | N36770    | 1q41          |
| 202703_at   | 15 | DUSP11     | NM_003584 | 2p13.1        |
| 218576_s_at | 15 | DUSP12     | NM_007240 | 1q21-q22      |
| 219963_at   | 13 | DUSP13     | NM_016364 | 10q22.3       |
| 203367_at   | 15 | DUSP14     | NM_007026 | 17q12         |
| 218845_at   | 15 | DUSP22     | NM_020185 | 6p25.3        |
| 219144_at   | 15 | DUSP26     | NM_024025 | 8p12          |
| 201536_at   | 15 | DUSP3      | AL048503  | 17q21         |
| 201537_s_at | 15 | DUSP3      | AL048503  | 17q21         |
| 201538_s_at | 14 | DUSP3      | AL048503  | 17q21         |
| 208891_at   | 15 | DUSP6      | BC003143  | 12q22-q23     |
| 208892_s_at | 15 | DUSP6      | BC003143  | 12q22-q23     |
| 213848_at   | 15 | DUSP7      | AI655015  | 3p21          |
| 206374_at   | 15 | DUSP8      | NM_004420 | 11p15.5       |
| 208955_at   | 15 | DUT        | AB049113  | 15q15-q21.1   |
| 208956_x_at | 15 | DUT        | AB049113  | 15q15-q21.1   |
| 209932_s_at | 15 | DUT        | U90223    | 15q15-q21.1   |
| 203230_at   | 15 | DVL1       | AF006011  | 1p36          |
| 57532_at    | 15 | DVL2       | AW016304  | 17p13.2       |
| 201908_at   | 15 | DVL3       | NM_004423 | 3q27          |
| 209821_at   | 15 | DVS27      | AB024518  | 9p24.1        |
| 219061_s_at | 15 | DXS9879E   | NM_006014 | Xq28          |
| 222338_x_at | 14 | DXS9879E   | AI375965  | 9p13.3        |

|             |    |                       |           |                |
|-------------|----|-----------------------|-----------|----------------|
| 203624_at   | 14 | DXYS155E              | NM_005088 | --- /// ---    |
| 217976_s_at | 15 | DYNC1LI1              | NM_016141 | 3p22.3         |
| 203590_at   | 15 | DYNC1LI2              | NM_006141 | 16q22.1        |
| 203762_s_at | 10 | DYNC2LI1              | NM_016008 | 2p25.1-p24.1   |
| 203763_at   | 15 | DYNC2LI1              | NM_016008 | 2p25.1-p24.1   |
| 200703_at   | 15 | DYNLL1                | NM_003746 | 12q24.23       |
| 217917_s_at | 15 | DYNLRB1               | NM_014183 | 20q11.21       |
| 217918_at   | 15 | DYNLRB1               | NM_014183 | 20q11.21       |
| 201999_s_at | 15 | DYNLT1                | NM_006519 | 6q25.2-q25.3   |
| 203303_at   | 15 | DYNLT3                | NM_006520 | Xp21           |
| 209033_s_at | 15 | DYRK1A                | D86550    | 21q22.13       |
| 202968_s_at | 15 | DYRK2                 | Y09216    | 12q14.3        |
| 202969_at   | 15 | DYRK2                 | AI216690  | 12q14.3        |
| 202970_at   | 13 | DYRK2                 | AI192838  | 12q14.3        |
| 202971_s_at | 10 | DYRK2                 | Y09216    | 12q14.3        |
| 212954_at   | 15 | DYRK4                 | AF263541  | 12p13.32       |
| 204556_s_at | 13 | DZIP1                 | AL568422  | 13q32.1        |
| 204557_s_at | 11 | DZIP1                 | NM_014934 | 13q32.1        |
| 207231_at   | 14 | DZIP3                 | NM_014648 | 3q13.13        |
| 213186_at   | 15 | DZIP3                 | BG502305  | 3q13.13        |
| 222146_s_at | 15 | E2-2                  | AK026674  | 18q21.1        |
| 205371_s_at | 12 | E2B                   | M27093    | 1p31           |
| 203692_s_at | 10 | E2F3                  | AI640363  | 6p22           |
| 203693_s_at | 13 | E2F3                  | NM_001949 | 6p22           |
| 203957_at   | 13 | E2F6                  | NM_001952 | 2p25.1         |
| 219990_at   | 14 | E2F8                  | NM_024680 | 11p15.1        |
| 215210_s_at | 15 | E2k                   | S72422    | 14q24.3        |
| 209095_at   | 15 | E3; LAD; DLDH; PHE3   | J03620    | 7q31-q32       |
| 209478_at   | 15 | E3; MGC14480          | U95006    | 17q25.3        |
| 209028_s_at | 15 | E3B1                  | AF006516  | 10p11.2        |
| 215533_s_at | 11 | E4                    | AF091093  | 1p36.3         |
| 208833_s_at | 15 | E46L; SCA10; FLJ37990 | AF119662  | 22q13.31       |
| 218524_at   | 12 | E4F1                  | NM_004424 | 16p13.3        |
| 208768_x_at | 15 | EAP; HBP15; HBP15/L22 | D17652    | 1p36.3-p36.2   |
| 204274_at   | 15 | EBAG9                 | AA812215  | 8q23           |
| 204278_s_at | 13 | EBAG9                 | NM_004215 | 8q23           |
| 220392_at   | 15 | EBF2                  | NM_022659 | 8p21.2         |
| 205419_at   | 13 | EBI2                  | NM_004951 | 13q32.3        |
| 201323_at   | 15 | EBNA1BP2              | NM_006824 | 1p35-p33       |
| 213787_s_at | 15 | EBP                   | AV702405  | Xp11.23-p11.22 |
| 208676_s_at | 15 | EBP1                  | U87954    | 12q13          |
| 221475_s_at | 15 | EC45                  | AF279903  | 3p24.1         |
| 221476_s_at | 15 | EC45                  | AF279903  | 3p24.1         |
| 201749_at   | 15 | ECE1                  | BF969352  | ---            |
| 216449_x_at | 15 | ECGP; GP96; GRP94     | AK025862  | 12q24.2-q24.3  |
| 200789_at   | 15 | ECH1                  | NM_001398 | 19q13.1        |
| 219974_x_at | 15 | ECHDC1                | NM_018479 | 6q22.33        |
| 218552_at   | 15 | ECHDC2                | NM_018281 | 1p32.3         |
| 219298_at   | 15 | ECHDC3                | NM_024693 | 10p14          |
| 201135_at   | 15 | ECHS1                 | NM_004092 | 10q26.2-q26.3  |

|             |    |                |           |                   |
|-------------|----|----------------|-----------|-------------------|
| 209365_s_at | 15 | ECM1           | U65932    | 1q21              |
| 206101_at   | 15 | ECM2           | NM_001393 | 9q22.3            |
| 208091_s_at | 15 | ECOP           | NM_030796 | 7p11.2 /// 7p11.2 |
| 219787_s_at | 14 | ECT2           | NM_018098 | 3q26.1-q26.2      |
| 206217_at   | 13 | EDA            | NM_001399 | Xq12-q13.1        |
| 208882_s_at | 15 | EDD            | U69567    | 8q22              |
| 208883_at   | 15 | EDD            | BF515424  | ---               |
| 208884_s_at | 15 | EDD            | AF006010  | 8q22              |
| 203279_at   | 10 | EDEM1          | NM_014674 | 3p26.1            |
| 204642_at   | 15 | EDG1           | NM_001400 | 1p21              |
| 204036_at   | 14 | EDG2           | AW269335  | 9q32              |
| 204037_at   | 15 | EDG2           | BF055366  | 9q32              |
| 204038_s_at | 13 | EDG2           | NM_001401 | 9q32              |
| 204463_s_at | 15 | EDNRA          | NM_001957 | 4q31.22           |
| 204464_s_at | 15 | EDNRA          | NM_001957 | 4q31.22           |
| 204271_s_at | 15 | EDNRB          | NM_000115 | 13q22             |
| 204273_at   | 15 | EDNRB          | NM_000115 | 13q22             |
| 206701_x_at | 15 | EDNRB          | NM_003991 | 13q22             |
| 213410_at   | 15 | EDRF1          | AL050102  | 10q26.2           |
| 204892_x_at | 15 | EEF1A1         | NM_001402 | 6q14.1            |
| 206559_x_at | 15 | EEF1A1         | NM_001403 | ---               |
| 213477_x_at | 15 | EEF1A1         | AL515273  | 6q14.1            |
| 213583_x_at | 15 | EEF1A1         | BE964125  | 6q14.1            |
| 213614_x_at | 15 | EEF1A1         | BE786672  | ---               |
| 204540_at   | 15 | EEF1A2         | NM_001958 | 20q13.3           |
| 200705_s_at | 15 | EEF1B2         | NM_001959 | 2q33-q34          |
| 203113_s_at | 15 | EEF1D          | NM_001960 | 8q24.3            |
| 214394_x_at | 15 | EEF1D          | AI613383  | 8q24.3            |
| 204905_s_at | 15 | EEF1E1         | NM_004280 | 6p24.3-p25.1      |
| 200689_x_at | 15 | EEF1G          | NM_001404 | 11q12.3           |
| 211345_x_at | 15 | EEF1G          | AF119850  | ---               |
| 200094_s_at | 15 | EEF2           | AI004246  | ---               |
| 204102_s_at | 15 | EEF2           | NM_001961 | 19pter-q12        |
| 212400_at   | 15 | EEIG1          | AL043266  | ---               |
| 211200_s_at | 12 | EFCAB2         | BC002836  | ---               |
| 201842_s_at | 15 | EFEMP1         | AI826799  | 2p16              |
| 201843_s_at | 12 | EFEMP1         | NM_004105 | 2p16              |
| 206580_s_at | 15 | EFEMP2         | NM_016938 | 11q13             |
| 212410_at   | 15 | EFHA1          | AI346431  | 13q12.11          |
| 219833_s_at | 15 | EFHC1          | NM_018100 | 6p12.3            |
| 220591_s_at | 15 | EFHC2          | NM_025184 | Xp11.4            |
| 217992_s_at | 13 | EFHD2          | AW664179  | 1p36.13           |
| 202023_at   | 15 | EFNA1          | NM_004428 | 1q21-q22          |
| 202668_at   | 15 | EFNB2          | BF001670  | 13q33             |
| 205031_at   | 13 | EFNB3          | NM_001406 | 17p13.1-p11.2     |
| 204400_at   | 15 | EFS            | NM_005864 | 14q11.2-q12       |
| 212656_at   | 14 | EF-TS; EF-Tsmt | AF110399  | 12q13.2           |
| 218973_at   | 15 | EFTUD1         | NM_024580 | 15q25.1           |
| 206254_at   | 15 | EGF            | NM_001963 | 4q25              |
| 212830_at   | 14 | EGFL5          | W68084    | 9q32-q33.3        |

|             |    |         |           |               |
|-------------|----|---------|-----------|---------------|
| 219454_at   | 11 | EGFL6   | NM_015507 | Xp22          |
| 218825_at   | 15 | EGFL7   | NM_016215 | 9q34.3        |
| 208469_s_at | 14 | EGFL8   | NM_030652 | 6p21.3        |
| 211551_at   | 10 | EGFR    | K03193    | 7p12          |
| 221497_x_at | 15 | EGLN1   | BC005369  | 1q42.1        |
| 220956_s_at | 15 | EGLN2   | NM_017555 | 19q13.2       |
| 219232_s_at | 15 | EGLN3   | NM_022073 | 14q13.1       |
| 201693_s_at | 14 | EGR1    | NM_001964 | 5q31.1        |
| 201694_s_at | 15 | EGR1    | NM_001964 | 5q31.1        |
| 206115_at   | 10 | EGR3    | NM_004430 | 8p23-p21      |
| 91703_at    | 11 | EHBP1L1 | AA149545  | 11q13.1       |
| 208112_x_at | 15 | EHD1    | NM_006795 | 11q13         |
| 45297_at    | 14 | EHD2    | AI417917  | 19q13.3       |
| 218935_at   | 15 | EHD3    | NM_014600 | 2p21          |
| 209536_s_at | 15 | EHD4    | AF320070  | 15q11.1       |
| 208289_s_at | 14 | EI24    | NM_004879 | 11q24         |
| 216396_s_at | 15 | EI24    | AF131850  | 11q24         |
| 208669_s_at | 15 | EID1    | AF109873  | 15q21.1-q21.2 |
| 208670_s_at | 12 | EID1    | AF109873  | 15q21.1-q21.2 |
| 211698_at   | 15 | EID1    | AF349444  | 15q21.1-q21.2 |
| 201016_at   | 15 | EIF1AX  | BE542684  | Xp22.13       |
| 201017_at   | 15 | EIF1AX  | BG149698  | Xp22.13       |
| 201018_at   | 15 | EIF1AX  | BE542684  | Xp22.13       |
| 201019_s_at | 15 | EIF1AX  | NM_001412 | Xp22.13       |
| 204409_s_at | 10 | EIF1AY  | BC005248  | Yq11.222      |
| 204410_at   | 10 | EIF1AY  | NM_004681 | Yq11.222      |
| 217736_s_at | 15 | EIF2AK1 | AW007368  | 7p22          |
| 204211_x_at | 14 | EIF2AK2 | NM_002759 | 2p22-p21      |
| 218696_at   | 15 | EIF2AK3 | NM_004836 | 2p12          |
| 209429_x_at | 15 | EIF2B   | AF112207  | 2p23.3        |
| 201632_at   | 14 | EIF2B1  | NM_001414 | 12q24.31      |
| 202461_at   | 15 | EIF2B2  | NM_014239 | 14q24.3       |
| 218488_at   | 15 | EIF2B3  | NM_020365 | 1p34.1        |
| 215482_s_at | 15 | EIF2B4  | AJ011307  | 2p23.3        |
| 218287_s_at | 14 | EIF2C1  | NM_012199 | 1p35-p34      |
| 213310_at   | 13 | EIF2C2  | AI613483  | 8q24          |
| 219426_at   | 14 | EIF2C3  | NM_024852 | 1p34.3        |
| 219190_s_at | 10 | EIF2C4  | NM_017629 | 1p34.3        |
| 201142_at   | 15 | EIF2S1  | BC002513  | 14q24.1       |
| 201143_s_at | 14 | EIF2S1  | BC002513  | 14q24.1       |
| 201144_s_at | 15 | EIF2S1  | NM_004094 | 14q24.1       |
| 208726_s_at | 15 | EIF2S2  | BC000461  | 20pter-q12    |
| 208688_x_at | 15 | eIF3    | U78525    | 7p22.3        |
| 210501_x_at | 15 | eIF3k   | AF119846  | 19q13.2       |
| 208264_s_at | 15 | EIF3S1  | NM_003758 | 15q15.1       |
| 208985_s_at | 15 | EIF3S1  | BC002719  | 15q15.1       |
| 217364_x_at | 11 | EIF3S1  | AL031313  | ---           |
| 200595_s_at | 15 | EIF3S10 | NM_003750 | 10q26         |
| 200596_s_at | 15 | EIF3S10 | BE614908  | 10q26         |
| 212716_s_at | 15 | EIF3S12 | AW083133  | 19q13.2       |

|             |    |           |           |                 |
|-------------|----|-----------|-----------|-----------------|
| 201592_at   | 15 | EIF3S3    | NM_003756 | 8q24.11         |
| 214328_s_at | 15 | EIF3S3    | R01140    | ---             |
| 208887_at   | 15 | EIF3S4    | BC000733  | 19p13.2         |
| 200023_s_at | 15 | EIF3S5    | AI001896  | 11p15.4         |
| 208697_s_at | 15 | EIF3S6    | BC000734  | 8q22-q23        |
| 217719_at   | 15 | EIF3S6IP  | NM_016091 | 22q             |
| 200005_at   | 15 | EIF3S7    | NM_003753 | 22q13.1         |
| 200647_x_at | 15 | EIF3S8    | NM_003752 | 16p11.2         |
| 210949_s_at | 15 | EIF3S8    | BC000533  | 16p11.2         |
| 215230_x_at | 15 | EIF3S8    | AA679705  | 16p11.2         |
| 203462_x_at | 15 | EIF3S9    | NM_003751 | 7p22.3          |
| 211501_s_at | 14 | EIF3S9    | BC001173  | 7p22.3          |
| 201530_x_at | 15 | EIF4A1    | NM_001416 | 17p13           |
| 214805_at   | 15 | EIF4A1    | U79273    | 17p13           |
| 200912_s_at | 15 | EIF4A2    | NM_001967 | 3q28            |
| 211937_at   | 15 | EIF4B     | NM_001417 | 12q13.13        |
| 211938_at   | 15 | EIF4B     | BF247371  | 12q13.13        |
| 201435_s_at | 15 | EIF4E     | AW268640  | 4q21-q25        |
| 201436_at   | 14 | EIF4E     | AI742789  | 4q21-q25        |
| 201437_s_at | 14 | EIF4E     | NM_001968 | 4q21-q25        |
| 213571_s_at | 15 | EIF4E2    | BF516289  | 2q37.1          |
| 208770_s_at | 15 | EIF4EBP2  | BC005057  | 10q21-q22       |
| 209393_s_at | 11 | EIF4EL3   | AF047695  | 2q37.1          |
| 218626_at   | 15 | EIF4ENIF1 | NM_019843 | 22q11.2         |
| 208624_s_at | 13 | EIF4G1    | BE966878  | 3q27-qter       |
| 208625_s_at | 15 | EIF4G1    | BE966878  | 3q27-qter       |
| 200004_at   | 15 | EIF4G2    | NM_001418 | 11p15           |
| 201935_s_at | 15 | EIF4G3    | AI768122  | 1p36.12         |
| 201936_s_at | 10 | EIF4G3    | NM_003760 | 1p36.12         |
| 208290_s_at | 15 | EIF5      | NM_001969 | 14q32.33        |
| 208705_s_at | 15 | EIF5      | BG481972  | 14q32.33        |
| 208708_x_at | 15 | EIF5      | AL080102  | 14q32.33        |
| 201122_x_at | 15 | EIF5A     | BC000751  | 17p13-p12       |
| 201123_s_at | 15 | EIF5A     | NM_001970 | 17p13-p12       |
| 213757_at   | 15 | EIF5A     | AA393940  | 17p13-p12       |
| 208706_s_at | 15 | EIF-5A    | AK026933  | 14q32.33        |
| 201024_x_at | 14 | EIF5B     | NM_015904 | 2p11.1-q11.1    |
| 201027_s_at | 15 | EIF5B     | NM_015904 | 2p11.1-q11.1    |
| 214314_s_at | 12 | EIF5B     | BE138647  | 2p11.1-q11.1    |
| 210213_s_at | 15 | eIF6      | AF022229  | 20q12           |
| 210504_at   | 14 | EKLF      | U65404    | 19p13.13-p13.12 |
| 201767_s_at | 13 | ELAC2     | NM_018127 | 17p11.2         |
| 201726_at   | 15 | ELAVL1    | BC003376  | 19p13.2         |
| 201727_s_at | 13 | ELAVL1    | NM_001419 | 19p13.2         |
| 203822_s_at | 15 | ELF2      | NM_006874 | 4q28            |
| 210361_s_at | 15 | ELF2      | AF256223  | 4q28            |
| 212680_x_at | 15 | ELF2      | BE305165  | 11q13           |
| 203617_x_at | 10 | ELK1      | NM_005229 | Xp11.2          |
| 221773_at   | 15 | ELK3      | AW575374  | 12q23           |
| 215606_s_at | 14 | ELKS      | AB029004  | 12p13.3         |



|             |    |             |           |                |
|-------------|----|-------------|-----------|----------------|
| 204513_s_at | 12 | ELMO1       | NM_014800 | 7p14.1         |
| 55692_at    | 15 | ELMO2       | W22924    | 20q13          |
| 212670_at   | 15 | ELN         | AA479278  | 7q11.23        |
| 57163_at    | 15 | ELOVL1      | H93026    | 1p34.1         |
| 208788_at   | 15 | ELOVL5      | AL136939  | 6p21.1-p12.1   |
| 215082_at   | 12 | ELOVL5      | BF973387  | 6p21.1-p12.1   |
| 204256_at   | 15 | ELOVL6      | NM_024090 | 4q25           |
| 221094_s_at | 11 | ELP3        | NM_018091 | 8p21.1         |
| 203829_at   | 15 | ELP4        | NM_019040 | 11p13          |
| 219134_at   | 15 | ELTD1       | NM_022159 | 1p33-p32       |
| 219436_s_at | 15 | EMCN; EMCN2 | AF205940  | 4q23           |
| 209477_at   | 15 | EMD         | BC000738  | Xq28           |
| 204163_at   | 10 | EMILIN1     | NM_007046 | 2p23.3-p23.2   |
| 204796_at   | 15 | EML1        | NM_004434 | 14q32          |
| 204797_s_at | 15 | EML1        | NM_004434 | 14q32          |
| 204398_s_at | 14 | EML2        | NM_012155 | 19q13.32       |
| 213063_at   | 15 | EML5        | BF970253  | 14q31.3        |
| 201324_at   | 15 | EMP1        | NM_001423 | 12p12.3        |
| 201325_s_at | 15 | EMP1        | NM_001423 | 12p12.3        |
| 213895_at   | 12 | EMP1        | BF445047  | 12p12.3        |
| 204975_at   | 15 | EMP2        | NM_001424 | 16p13.2        |
| 203729_at   | 15 | EMP3        | NM_001425 | 19q13.3        |
| 211339_s_at | 15 | EMT         | D13720    | 5q31-q32       |
| 217820_s_at | 15 | ENAH        | NM_018212 | 1q42.13        |
| 201341_at   | 13 | ENC1        | NM_003633 | 5q12-q13.3     |
| 204824_at   | 14 | ENDOG       | NM_004435 | 9q34.1         |
| 205521_at   | 14 | ENDOGL1     | BF511976  | 3p21.3         |
| 201809_s_at | 15 | ENG         | NM_000118 | 9q33-q34.1     |
| 201231_s_at | 15 | ENO1        | NM_001428 | 1p36.3-p36.2   |
| 217294_s_at | 15 | ENO1L1      | U88968    | 1p36.3-p36.2   |
| 201313_at   | 15 | ENO2        | NM_001975 | 12p13          |
| 204483_at   | 15 | ENO3        | NM_001976 | 17pter-p11     |
| 204142_at   | 15 | ENOSF1      | NM_017512 | 18p11.32       |
| 204143_s_at | 15 | ENOSF1      | NM_017512 | 18p11.32       |
| 204845_s_at | 15 | ENPEP       | NM_001977 | 4q25           |
| 204160_s_at | 15 | ENPP4       | NM_014936 | 6p21.1         |
| 204161_s_at | 11 | ENPP4       | NM_014936 | 6p21.1         |
| 202596_at   | 15 | ENSA        | BC000436  | 1q21.3         |
| 221486_at   | 15 | ENSA        | AF067170  | 1q21.3         |
| 221487_s_at | 11 | ENSA        | AF067170  | 1q21.3         |
| 204717_s_at | 13 | ENT2        | AF034102  | 11q13          |
| 201768_s_at | 15 | ENTH        | BC004467  | 5q23.1-q33.3   |
| 201769_at   | 15 | ENTH        | NM_014666 | 5q23.1-q33.3   |
| 207691_x_at | 13 | ENTPD1      | NM_001776 | 10q24          |
| 209473_at   | 15 | ENTPD1      | AV717590  | 10q24          |
| 209474_s_at | 10 | ENTPD1      | AV717590  | 10q24          |
| 219731_at   | 15 | ENTPD1      | NM_024343 | 10q24          |
| 201704_at   | 13 | ENTPD6      | NM_001247 | 20p11.2-p11.22 |
| 218482_at   | 15 | ENY2        | NM_020189 | 8q23.2         |
| 210374_x_at | 14 | EP3         | D38300    | 1p31.2         |

|             |    |          |           |                          |
|-------------|----|----------|-----------|--------------------------|
| 202221_s_at | 15 | EP300    | AV727101  | 22q13.2                  |
| 213579_s_at | 15 | EP300    | AI459462  | 22q13.2                  |
| 212375_at   | 11 | EP400    | BE880591  | 12q24.33                 |
| 212336_at   | 14 | EPB41L1  | AL121895  | 20q11.2-q12              |
| 201718_s_at | 14 | EPB41L2  | BF511685  | 6q23                     |
| 201719_s_at | 15 | EPB41L2  | NM_001431 | 6q23                     |
| 206710_s_at | 15 | EPB41L3  | NM_012307 | 18p11.32                 |
| 211776_s_at | 15 | EPB41L3  | BC006141  | 18p11.32 ///<br>18p11.32 |
| 212681_at   | 14 | EPB41L3  | AI770004  | 18p11.32                 |
| 204505_s_at | 15 | EPB49    | NM_001978 | 8p21.1                   |
| 216437_at   | 12 | EPC1     | AK024949  | ---                      |
| 203499_at   | 14 | EPHA2    | NM_004431 | 1p36                     |
| 202894_at   | 15 | EPHB4    | NM_004444 | 7q22                     |
| 216680_s_at | 14 | EPHB4    | BC004264  | 7q22                     |
| 204718_at   | 13 | EPHB6    | NM_004445 | 7q33-q35                 |
| 202017_at   | 12 | EPHX1    | NM_000120 | 1q42.1                   |
| 213434_at   | 15 | EPIM     | H95263    | 12q24.33                 |
| 202669_s_at | 15 | EPLG5    | U16797    | 13q33                    |
| 217892_s_at | 15 | EPLIN    | BC001247  | 12q13                    |
| 205231_s_at | 15 | EPM2A    | NM_005670 | 6q24                     |
| 202909_at   | 15 | EPM2AIP1 | NM_014805 | 3p22.1                   |
| 203464_s_at | 15 | EPN2     | NM_014964 | 17p11.2                  |
| 209962_at   | 10 | EPOR     | M34986    | 19p13.3-p13.2            |
| 209963_s_at | 15 | EPOR     | M34986    | 19p13.3-p13.2            |
| 215054_at   | 14 | EPOR     | H16758    | 19p13.3-p13.2            |
| 37986_at    | 10 | EPOR     | M60459    | 19p13.3-p13.2            |
| 210534_s_at | 15 | EPPB9    | BC002944  | 17p11.2                  |
| 200842_s_at | 15 | EPRS     | AI475965  | 1q41-q42                 |
| 200843_s_at | 15 | EPRS     | NM_004446 | 1q41-q42                 |
| 217886_at   | 15 | EPS15    | BF213575  | 1p32                     |
| 217887_s_at | 15 | EPS15    | BF213575  | 1p32                     |
| 222113_s_at | 15 | EPS15L1  | AV710549  | 19p13.12                 |
| 202609_at   | 15 | EPS8     | NM_004447 | 12q23-q24                |
| 217053_x_at | 13 | ER81     | X87175    | 7p22                     |
| 219672_at   | 15 | ERAF     | NM_016633 | 16p11.2                  |
| 212087_s_at | 15 | ERAL1    | AL562733  | 17q11.2                  |
| 217941_s_at | 15 | ERBB2IP  | NM_018695 | 5q13.1                   |
| 202454_s_at | 15 | ERBB3    | NM_001982 | 12q13                    |
| 214053_at   | 15 | ERBB4    | AW772192  | ---                      |
| 203719_at   | 15 | ERCC1    | NM_001983 | 19q13.2-q13.3            |
| 203720_s_at | 15 | ERCC1    | NM_001983 | 19q13.2-q13.3            |
| 202176_at   | 12 | ERCC3    | NM_000122 | 2q21                     |
| 202414_at   | 13 | ERCC5    | NM_000123 | 13q22                    |
| 207347_at   | 15 | ERCC6    | NM_000124 | 10q11                    |
| 205162_at   | 10 | ERCC8    | NM_000082 | 5q12.1                   |
| 203643_at   | 15 | ERF      | NM_006494 | 19q13                    |
| 213541_s_at | 15 | ERG      | AI351043  | 21q22.3                  |
| 209218_at   | 15 | ERG1     | AF098865  | 8q24.1                   |
| 200043_at   | 15 | ERH      | NM_004450 | 14q24.1                  |

|             |    |         |           |                |   |
|-------------|----|---------|-----------|----------------|---|
| 212046_x_at | 13 | ERK1    | X60188    | 16p12-p11.2    |   |
| 218498_s_at | 13 | ERO1L   | NM_014584 | 14q22.1        |   |
| 201216_at   | 15 | ERP29   | NM_006817 | 12q24.13       |   |
| 216032_s_at | 15 | Erv46   | AF091085  | 20pter-q12     |   |
| 32032_at    | 15 | ES2     | L77566    | 22q11.21       |   |
| 209009_at   | 15 | ESD     | BC001169  | 13q14.1-q14.2  |   |
| 215095_at   | 11 | ESD     | AU145746  | 13q14.1-q14.2  |   |
| 215096_s_at | 15 | ESD     | AU145746  | 13q14.1-q14.2  |   |
| 208394_x_at | 10 | ESM1    | NM_007036 | 5q11.2         |   |
| 38158_at    | 13 | ESPL1   | D79987    |                | 8 |
| 203193_at   | 14 | ESRRA   | NM_004451 | 11q13          |   |
| 207981_s_at | 15 | ESRRG   | NM_001438 | 1q41           |   |
| 209966_x_at | 13 | ESRRG   | AB020639  | 1q41           |   |
| 34868_at    | 15 | EST1B   | AB029012  | 1q21.2         |   |
| 219216_at   | 13 | ETAA16  | NM_019002 | 2p13-p15       |   |
| 201573_s_at | 15 | ETF1    | NM_004730 | 5q31.1         |   |
| 201574_at   | 15 | ETF1    | NM_004730 | 5q31.1         |   |
| 201931_at   | 15 | ETFA    | NM_000126 | 15q23-q25      |   |
| 202942_at   | 15 | ETFB    | NM_001985 | 19q13.3        |   |
| 205530_at   | 15 | ETFDH   | NM_004453 | 4q32-q35       |   |
| 33494_at    | 15 | ETFDH   | S69232    | 4q32-q35       |   |
| 204034_at   | 15 | ETHE1   | NM_014297 | 19q13.32       |   |
| 219017_at   | 15 | ETNK1   | NM_018638 | 12p12.2        |   |
| 205528_s_at | 13 | ETO     | X79990    | 8q22           |   |
| 201328_at   | 15 | ETS2    | AL575509  | 21q22.3        |   |
| 201329_s_at | 15 | ETS2    | NM_005239 | 21q22.3        |   |
| 222303_at   | 14 | ETS2    | AV700891  | 21q22.3        |   |
| 206501_x_at | 15 | ETV1    | NM_004956 | 7p22           |   |
| 217061_s_at | 10 | ETV1    | AC004857  | ---            |   |
| 221911_at   | 15 | ETV1    | BE881590  | 7p22           |   |
| 203348_s_at | 12 | ETV5    | BF060791  | 3q28           |   |
| 203349_s_at | 13 | ETV5    | NM_004454 | 3q28           |   |
| 221884_at   | 15 | EVI1    | BE466525  | 3q24-q28       |   |
| 204774_at   | 15 | EVI2A   | NM_014210 | 17q11.2        |   |
| 210347_s_at | 11 | EVI9    | AF080216  | 2p16.1         |   |
| 217838_s_at | 15 | EVL     | NM_016337 | 14q32.32       |   |
| 209214_s_at | 15 | EWSR1   | BC004817  | 22q12.2        |   |
| 210011_s_at | 15 | EWSR1   | BC000527  | 22q12.2        |   |
| 212034_s_at | 15 | EXOC7   | AI817079  | 17q25.3        |   |
| 207541_s_at | 15 | EXOSC10 | NM_002685 | 1p36.22        |   |
| 58696_at    | 12 | EXOSC4  | AL039469  | 8q24.3         |   |
| 91684_g_at  | 14 | EXOSC4  | AI571298  | 8q24.3         |   |
| 212627_s_at | 15 | EXOSC7  | AL581473  | 3p21.32        |   |
| 213648_at   | 10 | EXOSC7  | AW614427  | 3p21.32        |   |
| 205061_s_at | 15 | EXOSC9  | NM_005033 | 4q27           |   |
| 213226_at   | 15 | EXOSC9  | AI346350  | 4q27           |   |
| 201995_at   | 15 | EXT1    | NM_000127 | 8q24.11-q24.13 |   |
| 202012_s_at | 15 | EXT2    | AA196245  | 11p12-p11      |   |
| 202013_s_at | 15 | EXT2    | NM_000401 | 11p12-p11      |   |
| 209537_at   | 15 | EXTL2   | AF000416  | 1p21           |   |

|             |    |           |           |                    |
|-------------|----|-----------|-----------|--------------------|
| 220266_s_at | 11 | EZF; GKLF | AF105036  | 9q31               |
| 203249_at   | 13 | EZH1      | AB002386  | 17q21.1-q21.3      |
| 32259_at    | 15 | EZH1      | AB002386  | 17q21.1-q21.3      |
| 203358_s_at | 12 | EZH2      | NM_004456 | 7q35-q36           |
| 214715_x_at | 15 | F11       | AK024789  | 19q13.42           |
| 203305_at   | 15 | F13A1     | NM_000129 | 6p25.3-p24.3       |
| 213526_s_at | 14 | F25965    | BF215644  | 19q13.1            |
| 203989_x_at | 15 | F2R       | NM_001992 | 5q13               |
| 207300_s_at | 14 | F7        | NM_000131 | 13q34              |
| 205756_s_at | 15 | F8        | NM_000132 | Xq28               |
| 203274_at   | 15 | F8A1      | NM_012151 | Xq28               |
| 205738_s_at | 15 | FABP3     | NM_004102 | 1p33-p32           |
| 214285_at   | 15 | FABP3     | AI041520  | 1p33-p32           |
| 203980_at   | 15 | FABP4     | NM_001442 | 8q21               |
| 202345_s_at | 15 | FABP5     | NM_001444 | 8q21.13            |
| 201963_at   | 15 | FACL2     | NM_021122 | 4q34-q35           |
| 207275_s_at | 15 | FACL2     | NM_001995 | 4q34-q35           |
| 201660_at   | 15 | FACL3     | AL525798  | 2q34-q35           |
| 201661_s_at | 15 | FACL3     | D89053    | 2q34-q35           |
| 201662_s_at | 15 | FACL3     | D89053    | 2q34-q35           |
| 202422_s_at | 14 | FACL4     | NM_022977 | Xq22.3-q23         |
| 202535_at   | 10 | FADD      | NM_003824 | 11q13.3            |
| 208963_x_at | 15 | FADS1     | AL512760  | 11q12.2-q13.1      |
| 208964_s_at | 15 | FADS1     | AL512760  | 11q12.2-q13.1      |
| 202218_s_at | 15 | FADS2     | NM_004265 | 11q12-q13.1        |
| 204257_at   | 15 | FADS3     | NM_021727 | 11q12-q13.1        |
| 218080_x_at | 15 | FAF1      | NM_007051 | 1p33               |
| 202862_at   | 15 | FAH       | NM_000137 | 15q23-q25          |
| 218504_at   | 15 | FAHD2A    | NM_016044 | 2p24.3-p11.2       |
| 222056_s_at | 15 | FAHD2A    | AA723370  | 2p24.3-p11.2       |
| 220643_s_at | 15 | FAIM      | NM_018147 | 3q22.3             |
| 207186_s_at | 13 | FALZ      | NM_004459 | 17q24.3            |
| 219253_at   | 15 | FAM11B    | NM_024121 | 2q14.2             |
| 202972_s_at | 15 | FAM13A1   | NM_014883 | 4q22.1             |
| 202973_x_at | 15 | FAM13A1   | NM_014883 | 4q22.1             |
| 202915_s_at | 15 | FAM20B    | NM_014864 | 1p36.13-q41        |
| 202916_s_at | 14 | FAM20B    | NM_014864 | 1p36.13-q41        |
| 211068_x_at | 15 | FAM21C    | BC006456  | 10q11.1 // 10q11.1 |
| 57715_at    | 15 | FAM26B    | W72694    | 10pter-q26.12      |
| 201863_at   | 15 | FAM32A    | NM_014077 | 19pter-p13.3       |
| 220547_s_at | 15 | FAM35A    | NM_019054 | 10q23.31           |
| 202771_at   | 15 | FAM38A    | NM_014745 | 16q24.3            |
| 209405_s_at | 14 | FAM3A     | BC002934  | Xq28               |
| 38043_at    | 15 | FAM3A     | X55448    | Xq28               |
| 201889_at   | 15 | FAM3C     | NM_014888 | 7q22.1-q31.1       |
| 221804_s_at | 15 | FAM45A    | AI697488  | Xq26.1             |
| 221766_s_at | 15 | FAM46A    | AW246673  | 6q14               |
| 220408_x_at | 15 | FAM48A    | NM_017569 | 13q13.2            |
| 221774_x_at | 15 | FAM48A    | AW003334  | 13q13.2            |
| 217916_s_at | 15 | FAM49B    | NM_016623 | 8q24.21            |

|             |    |                  |           |               |
|-------------|----|------------------|-----------|---------------|
| 203262_s_at | 15 | FAM50A           | NM_004699 | Xq28          |
| 205775_at   | 13 | FAM50B           | NM_012135 | 6p25-pter     |
| 203206_at   | 15 | FAM53B           | NM_014661 | 10q26.2       |
| 218023_s_at | 15 | FAM53C           | NM_016605 | 5q31          |
| 221591_s_at | 15 | FAM64A           | BC005004  | 17p13.2       |
| 218029_at   | 11 | FAM65A           | NM_024519 | 16q22.1       |
| 218126_at   | 15 | FAM82C           | NM_018145 | 15q14         |
| 203420_at   | 15 | FAM8A1           | NM_016255 | 6p22-p23      |
| 218074_at   | 15 | FAM96B           | NM_016062 | 16q22.1-q22.3 |
| 205189_s_at | 15 | FANCC            | NM_000136 | 9q22.3        |
| 220255_at   | 15 | FANCE            | NM_021922 | 6p21-p22      |
| 203564_at   | 14 | FANCG            | NM_004629 | 9p13          |
| 218397_at   | 15 | FANCL            | NM_018062 | 2p16.1        |
| 201910_at   | 15 | FARP1            | BF213279  | 13q32.2-q32.3 |
| 201911_s_at | 15 | FARP1            | NM_005766 | 13q32.2-q32.3 |
| 204282_s_at | 14 | FARS2            | NM_006567 | 6p25.1        |
| 204283_at   | 14 | FARS2            | NM_006567 | 6p25.1        |
| 202159_at   | 13 | FARSLA           | NM_004461 | 19p13.2       |
| 204780_s_at | 12 | FAS              | NM_000043 | 10q24.1       |
| 214114_x_at | 15 | FAST             | AK023141  | 7q35 /// 7q35 |
| 202676_x_at | 12 | FASTK            | NM_006712 | 7q35          |
| 210975_x_at | 15 | FASTK            | BC000377  | 7q35          |
| 201579_at   | 15 | FAT              | NM_005245 | 4q34-q35      |
| 219427_at   | 15 | FAT4             | NM_024582 | 4q28.1        |
| 200019_s_at | 15 | FAU              | NM_001997 | 11q13         |
| 211919_s_at | 14 | FB22             | AF348491  | 2q21 /// 2q21 |
| 214436_at   | 12 | FBL2             | AF176518  | 3p22.3        |
| 209943_at   | 14 | FBL4; FBL5       | AF176699  | 6q16.1-q16.3  |
| 201787_at   | 11 | FBLN1            | NM_001996 | 22q13.31      |
| 202994_s_at | 14 | FBLN1            | Z95331    | 22q13.31      |
| 202995_s_at | 15 | FBLN1            | NM_006486 | 22q13.31      |
| 203886_s_at | 15 | FBLN2            | NM_001998 | 3p25-p24      |
| 203088_at   | 10 | FBLN5            | NM_006329 | 14q32.1       |
| 202765_s_at | 10 | FBN1             | AI264196  | 15q21.1       |
| 202766_s_at | 15 | FBN1             | NM_000138 | 15q21.1       |
| 203184_at   | 15 | FBN2             | NM_001999 | 5q23-q31      |
| 211074_at   | 13 | FBP              | AF000381  | ---           |
| 211503_s_at | 15 | FBP; RAB-14      | AF112206  | 9q32-q34.11   |
| 203598_s_at | 15 | FBP21; MGC117310 | AK000979  | 13q13.3       |
| 212824_at   | 15 | FBP3             | U69127    | 9q34.2        |
| 218255_s_at | 15 | FBS1             | NM_022452 | 16p11.2       |
| 212229_s_at | 15 | FBX21            | AK001699  | 12q24.23      |
| 210638_s_at | 15 | FBX9             | AF176704  | 6p12.3-p11.2  |
| 208988_at   | 15 | FBXL11           | BE675843  | 11q13.1       |
| 220127_s_at | 15 | FBXL12           | NM_017703 | 19p13.2       |
| 213145_at   | 14 | FBXL14           | BF001666  | 12p13.33      |
| 213249_at   | 15 | FBXL7            | AU145127  | 5p15.1        |
| 203255_at   | 14 | FBXO11           | NM_018693 | 2p21          |
| 222119_s_at | 15 | FBXO11           | AL117620  | 2p21          |
| 212231_at   | 15 | FBXO21           | AB020682  | 12q24.23      |

|             |    |          |           |                   |
|-------------|----|----------|-----------|-------------------|
| 202272_s_at | 15 | FBXO28   | NM_015176 | 1q42.12           |
| 218432_at   | 15 | FBXO3    | NM_012175 | 11p13             |
| 218539_at   | 15 | FBXO34   | NM_017943 | 14q22.2           |
| 205310_at   | 15 | FBXO34L  | NM_012066 | 19q13.3           |
| 221257_x_at | 15 | FBXO38   | NM_030793 | 5q33.1 /// 5q33.1 |
| 220164_s_at | 13 | FBXO40   | NM_016298 | 3q21.1            |
| 47773_at    | 13 | FBXO42   | AA836114  | 1p36.23-p36.11    |
| 218875_s_at | 13 | FBXO5    | NM_012177 | 6q25-q26          |
| 201178_at   | 15 | FBXO7    | NM_012179 | 22q12-q13         |
| 212987_at   | 15 | FBXO9    | AL031178  | 6p12.3-p11.2      |
| 209455_at   | 15 | FBXW11   | BE963245  | 5q35.1            |
| 215600_x_at | 15 | FBXW12   | AK022174  | 3p21.31           |
| 209630_s_at | 15 | FBXW2    | U87460    | 9q34              |
| 218941_at   | 15 | FBXW2    | NM_012164 | 9q34              |
| 218751_s_at | 15 | FBXW7    | NM_018315 | 4q31.3            |
| 204232_at   | 15 | FCER1G   | NM_004106 | 1q23              |
| 203561_at   | 10 | FCGR2A   | NM_021642 | 1q23              |
| 218831_s_at | 15 | FCGRT    | NM_004107 | 19q13.3           |
| 203620_s_at | 13 | FCHSD2   | NM_014824 | 11q13.3           |
| 205283_at   | 10 | FCMD     | NM_006731 | 9q31-q33          |
| 208647_at   | 15 | FDFT1    | AA872727  | 8p23.1-p22        |
| 210950_s_at | 15 | FDFT1    | BC003573  | 8p23.1-p22        |
| 201275_at   | 15 | FDPS     | NM_002004 | 1q22              |
| 203646_at   | 14 | FDX1     | NM_004109 | 11q22             |
| 203647_s_at | 15 | FDX1     | NM_004109 | 11q22             |
| 203116_s_at | 15 | FECH     | NM_000140 | 18q21.3           |
| 212367_at   | 15 | FEM1B    | NM_015322 | 15q22             |
| 212373_at   | 15 | FEM1B    | AW139179  | 15q22             |
| 213341_at   | 14 | FEM1C    | AI862658  | 5q22              |
| 37384_at    | 15 | FEM-2    | D86995    | 22q11.22          |
| 204767_s_at | 13 | FEN1     | BC000323  | 11q12             |
| 201798_s_at | 15 | FER1L3   | NM_013451 | 10q24             |
| 211864_s_at | 15 | FER1L3   | AF207990  | 10q24             |
| 203562_at   | 15 | FEZ1     | NM_005103 | 11q24.2           |
| 202305_s_at | 14 | FEZ2     | NM_005102 | 2p21              |
| 204819_at   | 12 | FGD1     | NM_004463 | Xp11.21           |
| 219901_at   | 13 | FGD6     | NM_018351 | 12q23.1           |
| 205117_at   | 15 | fgf gene | X59065    | 5q31              |
| 208240_s_at | 11 | FGF1     | NM_013394 | 5q31 /// 5q31     |
| 207501_s_at | 15 | FGF12    | NM_004113 | 3q28              |
| 214589_at   | 15 | FGF12    | AL119322  | 3q28              |
| 205110_s_at | 15 | FGF13    | NM_004114 | Xq26.3            |
| 206987_x_at | 15 | FGF18    | NM_003862 | 5q34              |
| 211029_x_at | 15 | FGF18    | BC006245  | 5q34 /// 5q34     |
| 214284_s_at | 12 | FGF18    | AA022949  | 5q34              |
| 205782_at   | 14 | FGF7     | NM_002009 | 15q15-q21.1       |
| 206404_at   | 15 | FGF9     | NM_002010 | 13q11-q12         |
| 222164_at   | 13 | FGFR1    | AU145411  | ---               |
| 205588_s_at | 13 | FGFR1OP  | NM_007045 | 6q27              |
| 214124_x_at | 15 | FGFR1OP  | AL043487  | 6q27              |

|             |    |          |           |               |
|-------------|----|----------|-----------|---------------|
| 205305_at   | 15 | FGL1     | NM_004467 | 8p22-p21.3    |
| 204834_at   | 15 | FGL2     | NM_006682 | 7q11.23       |
| 203033_x_at | 15 | FH       | NM_000143 | 1q42.1        |
| 214170_x_at | 15 | FH       | AA669797  | 1q42.1        |
| 213800_at   | 15 | FH       | X04697    | 1q32          |
| 206492_at   | 15 | FHIT     | NM_002012 | 3p14.2        |
| 201540_at   | 15 | FHL1     | NM_001449 | Xq26          |
| 210298_x_at | 15 | FHL1     | AF098518  | Xq26          |
| 214505_s_at | 15 | FHL1     | AF220153  | Xq26          |
| 201539_s_at | 15 | FHL-1    | U29538    | Xq26          |
| 210299_s_at | 15 | FHL1B    | AF063002  | Xq26          |
| 202949_s_at | 15 | FHL2     | NM_001450 | 2q12-q14      |
| 218530_at   | 15 | FHOD1    | NM_013241 | 16q22         |
| 218980_at   | 15 | FHOD3    | NM_025135 | 18q12         |
| 202041_s_at | 15 | FIBP     | NM_004214 | 11q13.1       |
| 215032_at   | 14 | FINB     | AK022442  | ---           |
| 212343_at   | 10 | FinGER6  | AL117461  | Xq12          |
| 214879_x_at | 14 | FIP      | AY007087  | 19q13         |
| 221007_s_at | 15 | FIP1L1   | NM_030917 | 4q12 /// 4q12 |
| 209899_s_at | 15 | FIR      | AF217197  | 8q24.2-qtel   |
| 222130_s_at | 10 | FJH1     | AK024635  | 7p22          |
| 219522_at   | 12 | FJX1     | NM_014344 | 11p13         |
| 219117_s_at | 15 | FKBP11   | NM_016594 | 12q13.12      |
| 219118_at   | 15 | FKBP11   | NM_016594 | 12q13.12      |
| 219390_at   | 14 | FKBP14   | NM_017946 | 7p15.1        |
| 200709_at   | 15 | FKBP1A   | NM_000801 | 20p13         |
| 210186_s_at | 15 | FKBP1A   | BC005147  | 20p13         |
| 210187_at   | 15 | FKBP1A   | BC005147  | 20p13         |
| 214119_s_at | 15 | FKBP1A   | AI936769  | 20p13         |
| 206857_s_at | 14 | FKBP1B   | NM_004116 | 2p24.1        |
| 203391_at   | 15 | FKBP2    | NM_004470 | 11q13.1-q13.3 |
| 218003_s_at | 15 | FKBP25   | M90820    | 14q21.3       |
| 200894_s_at | 12 | FKBP4    | NM_002014 | 12p13.33      |
| 200895_s_at | 15 | FKBP4    | NM_002014 | 12p13.33      |
| 212169_at   | 15 | FKBP9    | AL050187  | 7p11.1        |
| 208789_at   | 15 | FKSG13   | BC004295  | 17q21.31      |
| 208790_s_at | 15 | FKSG13   | AF312393  | 17q21.31      |
| 211445_x_at | 15 | FKSG17   | AF315951  | 8q22.3        |
| 209593_s_at | 15 | FKSG18   | AF317129  | 9q34          |
| 208588_at   | 13 | FKSG2    | NM_021631 | 8p11.2        |
| 208120_x_at | 15 | FKSG49   | NM_031221 | ---           |
| 211454_x_at | 14 | FKSG51   | AF336878  | ---           |
| 205661_s_at | 14 | FLAD1    | NM_025207 | 1q22          |
| 209046_s_at | 15 | FLC3A    | AB030710  | 16q22.3-q24.1 |
| 204236_at   | 13 | FLI1     | NM_002017 | 11q24.1-q24.3 |
| 210786_s_at | 11 | FLI1     | M93255    | 11q24.1-q24.3 |
| 212024_x_at | 13 | FLII     | U80184    | 17p11.2       |
| 222065_s_at | 15 | FLII     | AI830227  | 17p11.2       |
| 218349_s_at | 12 | FLJ10036 | AA824298  | 15q22.2       |
| 218008_at   | 15 | FLJ10099 | NM_017994 | 7q11.22       |

|             |    |                    |           |             |
|-------------|----|--------------------|-----------|-------------|
| 218067_s_at | 15 | FLJ10154           | NM_018011 | 13q33.2     |
| 218974_at   | 15 | FLJ10159           | NM_018013 | 6q21        |
| 45828_at    | 15 | FLJ10241           | AI768100  | 19q13.31    |
| 222200_s_at | 15 | FLJ10276           | AK021440  | 1p34.3      |
| 219130_at   | 15 | FLJ10287           | NM_019083 | 1pter-q31.3 |
| 58780_s_at  | 15 | FLJ10357           | R42449    | 14q11.2     |
| 208933_s_at | 15 | FLJ10359           | AI659005  | 1q42.3      |
| 44563_at    | 15 | FLJ10385           | AI858000  | 17p13.2     |
| 218920_at   | 15 | FLJ10404           | NM_019057 | 5q35.3      |
| 221656_s_at | 15 | FLJ10521           | BC003073  | 1p36.13     |
| 218155_x_at | 15 | FLJ10534; KIAA1401 | AK026565  | 17p13.3     |
| 218156_s_at | 15 | FLJ10534; KIAA1401 | AK026565  | 17p13.3     |
| 63009_at    | 15 | FLJ10539           | AI188402  | 3p14.2      |
| 201918_at   | 15 | FLJ10618           | AI927944  | 3q23        |
| 201919_at   | 15 | FLJ10618           | AL049246  | 3q23        |
| 212326_at   | 15 | FLJ10619           | AB007922  | 1p36.21     |
| 218614_at   | 15 | FLJ10652           | NM_018169 | 12p11.22    |
| 221806_s_at | 15 | FLJ10707           | BF590997  | 3p25.3      |
| 218314_s_at | 15 | FLJ10726           | AA024582  | 11q23.2     |
| 215792_s_at | 11 | FLJ10737           | AL109978  | 1p36.23     |
| 217940_s_at | 15 | FLJ10769           | NM_018210 | 13q34       |
| 217884_at   | 15 | FLJ10774           | NM_024662 | 11p13       |
| 218824_at   | 15 | FLJ10781           | NM_018215 | 19q13.33    |
| 209445_x_at | 15 | FLJ10803           | BC001743  | 7p13        |
| 209446_s_at | 10 | FLJ10803           | BC001743  | 7p13        |
| 218340_s_at | 12 | FLJ10808           | NM_018227 | 4q13.3      |
| 56821_at    | 12 | FLJ10815           | AI963454  | 16q13       |
| 212370_x_at | 15 | FLJ10824           | AL080183  | 10q11.23    |
| 221090_s_at | 12 | FLJ10826           | NM_018233 | 16q13       |
| 219044_at   | 10 | FLJ10916           | NM_018271 | 2p11.2      |
| 219718_at   | 13 | FLJ10986           | NM_018291 | 1p32.1      |
| 209688_s_at | 15 | FLJ10996           | BC005078  | 2q14.2      |
| 209689_at   | 12 | FLJ10996           | BC005078  | 2q14.2      |
| 219774_at   | 14 | FLJ10996           | NM_019044 | 2q14.2      |
| 218521_s_at | 14 | FLJ11011           | AK024050  | 8q13.3      |
| 219754_at   | 11 | FLJ11016           | NM_018301 | Xq22.1-24   |
| 202301_s_at | 15 | FLJ11021           | NM_023012 | 12q24.31    |
| 202302_s_at | 15 | FLJ11021           | NM_023012 | 12q24.31    |
| 218545_at   | 15 | FLJ11088           | NM_018318 | 12p11.23    |
| 218513_at   | 14 | FLJ11184           | NM_018352 | 4q32.2      |
| 203738_at   | 15 | FLJ11193           | AI421192  | 5p13.3      |
| 218449_at   | 15 | FLJ11200           | NM_018359 | 4q35.1      |
| 213228_at   | 15 | FLJ11212           | AK023913  | 5q14.1      |
| 218627_at   | 12 | FLJ11259           | NM_018370 | 12q23.3     |
| 218930_s_at | 15 | FLJ11273           | AV705186  | 7p21.3      |
| 218429_s_at | 11 | FLJ11286           | NM_018381 | 19p13.2     |
| 53720_at    | 15 | FLJ11286           | AI862559  | 19p13.2     |
| 219940_s_at | 15 | FLJ11305           | NM_018386 | 13q34       |
| 219791_s_at | 15 | FLJ11539           | NM_024748 | 4q34.1      |
| 211433_x_at | 15 | FLJ11560           | AL583909  | 9p13.2      |



|             |    |          |           |                |    |
|-------------|----|----------|-----------|----------------|----|
| 219056_at   | 15 | FLJ11712 | NM_024570 | 13q14.13       |    |
| 218214_at   | 15 | FLJ11773 | NM_021934 | 12q13.13       |    |
| 204216_s_at | 13 | FLJ11806 | NM_024824 | 14q31.3        |    |
| 213064_at   | 15 | FLJ11806 | N64802    | 14q31.3        |    |
| 214107_x_at | 15 | FLJ11822 | AW340850  |                | 17 |
| 218153_at   | 15 | FLJ12118 | NM_024537 | 13q34          |    |
| 48659_at    | 15 | FLJ12438 | W60802    | 1p36.21        |    |
| 218051_s_at | 15 | FLJ12442 | NM_022908 | 3p21.31        |    |
| 219022_at   | 10 | FLJ12448 | NM_022895 | 12q            |    |
| 217866_at   | 15 | FLJ12529 | NM_024811 | 11q12.3        |    |
| 215029_at   | 12 | FLJ12666 | AL117451  | ---            |    |
| 212766_s_at | 15 | FLJ12671 | AW294587  | 1q23.1         |    |
| 46142_at    | 11 | FLJ12681 | AI003763  | 16p13.3        |    |
| 219627_at   | 14 | FLJ12700 | NM_024910 | 7q36.1         |    |
| 218179_s_at | 14 | FLJ12716 | NM_021942 | 4q35.1         |    |
| 218838_s_at | 13 | FLJ12788 | NM_022492 | 2p13.1         |    |
| 214700_x_at | 15 | FLJ12870 | AK000323  | 2q24.1         |    |
| 222341_x_at | 11 | FLJ12892 | AW973235  | ---            |    |
| 217593_at   | 12 | FLJ12895 | AI375002  | 19q13.43       |    |
| 218879_s_at | 11 | FLJ12998 | NM_022764 | 16q24.1        |    |
| 208918_s_at | 15 | FLJ13052 | BE674658  | 1p36.33-p36.21 |    |
| 208919_s_at | 15 | FLJ13052 | BC001709  | 1p36.33-p36.21 |    |
| 219016_at   | 13 | FLJ13149 | NM_021826 | ---            |    |
| 219871_at   | 12 | FLJ13197 | NM_024614 | 4p14           |    |
| 218884_s_at | 12 | FLJ13220 | AK025248  | 4p13           |    |
| 203579_s_at | 12 | FLJ13291 | AI660619  | 16q22.1        |    |
| 222151_s_at | 15 | FLJ13386 | AK023738  | 3q22.1         |    |
| 219397_at   | 15 | FLJ13448 | NM_025147 | 2q33.1         |    |
| 44617_at    | 15 | FLJ13491 | AI431902  | 12q24.31       |    |
| 218962_s_at | 15 | FLJ13576 | NM_022484 | 7q31.32        |    |
| 218674_at   | 13 | FLJ13611 | NM_024941 | 5q12.3         |    |
| 204800_s_at | 14 | FLJ13639 | NM_024705 | 13q14.2        |    |
| 220321_s_at | 10 | FLJ13646 | NM_024584 | 2p23.3         |    |
| 45749_at    | 15 | FLJ13725 | AA400206  | 16q22.1        |    |
| 218734_at   | 15 | FLJ13848 | NM_024771 | 11q13.1        |    |
| 222369_at   | 15 | FLJ13848 | AW971254  | 11q13.1        |    |
| 217750_s_at | 15 | FLJ13855 | BE544096  | 17q21.33       |    |
| 217891_at   | 14 | FLJ13868 | NM_022744 | 16p11.2        |    |
| 212482_at   | 15 | FLJ13910 | BF671894  | 2p11.2         |    |
| 212479_s_at | 15 | FLJ13910 | AK022815  | 2p11.2         |    |
| 45633_at    | 11 | FLJ13912 | AI421812  | 16q13          |    |
| 213679_at   | 13 | FLJ13946 | AL049329  | 2q31.3         |    |
| 219054_at   | 15 | FLJ14054 | NM_024563 | 5p13.3         |    |
| 45526_g_at  | 15 | FLJ14154 | AI246641  | 16p13.3        |    |
| 212995_x_at | 15 | FLJ14346 | BG255188  | ---            |    |
| 213166_x_at | 15 | FLJ14346 | BG332462  | 2q21.2         |    |
| 211185_s_at | 15 | FLJ14753 | AF130099  | 9q22.32        |    |
| 44065_at    | 11 | FLJ14827 | AI937468  | 12q24.21       |    |
| 200979_at   | 15 | FLJ16518 | BF739979  | Xp22.13        |    |
| 208246_x_at | 15 | FLJ20006 | NM_017618 | 16q22.1        |    |

|             |    |                    |           |                   |
|-------------|----|--------------------|-----------|-------------------|
| 218789_s_at | 15 | FLJ20010           | NM_019021 | 11q14.2-q14.3     |
| 218986_s_at | 14 | FLJ20035           | NM_017631 | 4q32.3            |
| 219696_at   | 14 | FLJ20054           | NM_019049 | 1q31.3            |
| 219467_at   | 15 | FLJ20125           | NM_017676 | 5q21.2            |
| 220520_s_at | 11 | FLJ20130           | NM_017681 | Xq22.3            |
| 218510_x_at | 15 | FLJ20152           | NM_019000 | 5p15.1            |
| 218532_s_at | 15 | FLJ20152           | NM_019000 | 5p15.1            |
| 202808_at   | 15 | FLJ20154; FLJ20367 | AK000161  | 10q24.33          |
| 219646_at   | 15 | FLJ20186           | NM_017702 | 16q24.3           |
| 219846_at   | 10 | FLJ20203           | NM_025174 | 1q22              |
| 204593_s_at | 15 | FLJ20232           | AA046752  | 22q13             |
| 204594_s_at | 14 | FLJ20232           | NM_013298 | 22q13             |
| 221516_s_at | 15 | FLJ20232           | BC002587  | 22q13             |
| 58994_at    | 15 | FLJ20241           | AI689402  | 19p13.13          |
| 219620_x_at | 14 | FLJ20245           | NM_017723 | ---               |
| 217899_at   | 15 | FLJ20254           | NM_017727 | 2p23.3            |
| 218710_at   | 15 | FLJ20272           | NM_017735 | 2p23.2-p23.1      |
| 219717_at   | 12 | FLJ20280           | NM_017741 | 4p15.33           |
| 208773_s_at | 15 | FLJ20288           | AL136943  | 5q31.3            |
| 207856_s_at | 15 | FLJ20297           | NM_017951 | 2q21.2            |
| 206860_s_at | 15 | FLJ20323           | NM_019005 | 7p22-p21          |
| 211724_x_at | 15 | FLJ20323           | BC005883  | 7p22-p21          |
| 218630_at   | 13 | FLJ20345           | NM_017777 | 17q23.2           |
| 218692_at   | 13 | FLJ20366           | NM_017786 | 8q23.2            |
| 218460_at   | 15 | FLJ20397           | NM_017802 | 7p22.3            |
| 47105_at    | 10 | FLJ20399           | AA886893  | 16q22.1           |
| 218745_x_at | 10 | FLJ20422           | NM_017814 | 19p13.11          |
| 43977_at    | 14 | FLJ20422           | AI660497  | 19p13.11          |
| 220838_at   | 12 | FLJ20433           | NM_017820 | 9                 |
| 221821_s_at | 15 | FLJ20436; FLJ12670 | AK022732  | 12q13.12          |
| 218984_at   | 15 | FLJ20485           | NM_019042 | 7q22.2            |
| 48106_at    | 13 | FLJ20489           | H14241    | 12q13.11          |
| 219219_at   | 12 | FLJ20512           | NM_017854 | 19q13.33          |
| 218646_at   | 15 | FLJ20534           | NM_017867 | 4q33              |
| 217961_at   | 15 | FLJ20551           | NM_017875 | 3p21.33           |
| 219128_at   | 15 | FLJ20558           | NM_017880 | 2p13.3            |
| 203197_s_at | 15 | FLJ20580           | AW157077  | 1p32.3            |
| 212337_at   | 15 | FLJ20618           | AI687738  | 22q12.2           |
| 221229_s_at | 15 | FLJ20628           | NM_017910 | 2p23.3 /// 2p23.3 |
| 220060_s_at | 11 | FLJ20641           | NM_017915 | 12q23.3           |
| 217872_at   | 15 | FLJ20643           | NM_017916 | 19q13.33          |
| 220137_at   | 11 | FLJ20674           | NM_019086 | 12q24.23          |
| 207730_x_at | 15 | FLJ20700           | NM_017932 | 19p13.3           |
| 219093_at   | 13 | FLJ20701           | NM_017933 | 2q37.1            |
| 219289_at   | 14 | FLJ20718           | NM_017939 | 16q12.1           |
| 213612_x_at | 15 | FLJ20719           | AI800419  | 1q21.2            |
| 217895_at   | 15 | FLJ20758           | NM_017952 | 2p11.2            |
| 214749_s_at | 15 | FLJ20811           | AK000818  | Xq21.33-q22.3     |
| 218958_at   | 13 | FLJ20850           | NM_017967 | 19p13.11          |
| 51200_at    | 15 | FLJ20850           | AI744084  | 19p13.11          |

|             |    |                    |           |          |
|-------------|----|--------------------|-----------|----------|
| 218366_x_at | 15 | FLJ20859           | NM_022734 | 14q11.2  |
| 218844_at   | 14 | FLJ20920           | NM_025149 | 17q21.33 |
| 219980_at   | 14 | FLJ21106           | NM_025097 | 4q28.2   |
| 219751_at   | 14 | FLJ21148           | NM_024860 | 16q13    |
| 203513_at   | 15 | FLJ21439           | NM_025137 | 15q14    |
| 219377_at   | 15 | FLJ21610           | NM_022751 | 18q12.1  |
| 219269_at   | 13 | FLJ21616           | NM_024567 | 8p21.1   |
| 219029_at   | 11 | FLJ21657           | NM_022483 | 5p12     |
| 218531_at   | 15 | FLJ21749           | NM_025124 | 11q13.1  |
| 219008_at   | 12 | FLJ21820           | NM_021925 | 2p24.2   |
| 218483_s_at | 13 | FLJ21827           | NM_020153 | 11q23.3  |
| 220349_s_at | 14 | FLJ21865           | NM_022759 | 17q25.3  |
| 65635_at    | 15 | FLJ21865           | AL044097  | 17q25.3  |
| 219002_at   | 15 | FLJ21901           | NM_024622 | 2q31     |
| 218842_at   | 15 | FLJ21908           | NM_024604 | 12q13.11 |
| 219616_at   | 15 | FLJ21963           | NM_024560 | 12q21.31 |
| 220032_at   | 13 | FLJ21986           | NM_024913 | 7q31.32  |
| 212918_at   | 15 | FLJ22028           | AI962943  | 12p12.3  |
| 219802_at   | 15 | FLJ22028           | NM_024854 | 12p12.3  |
| 222209_s_at | 15 | FLJ22104           | AK000684  | 11q14.1  |
| 221800_s_at | 13 | FLJ22175           | AL514147  | 17q25.3  |
| 53071_s_at  | 15 | FLJ22222           | AI885411  | 17q25.3  |
| 218262_at   | 15 | FLJ22318           | NM_022762 | 5q35.3   |
| 218394_at   | 15 | FLJ22386           | NM_024589 | 16p13.3  |
| 222143_s_at | 14 | FLJ22405; FLJ90311 | AY007098  | 3p26     |
| 218175_at   | 15 | FLJ22471           | NM_025140 | 12q24.31 |
| 221925_s_at | 13 | FLJ22490           | BE044503  | 8q13.1   |
| 219176_at   | 15 | FLJ22555           | NM_024520 | 2q33.1   |
| 219458_s_at | 15 | FLJ22609           | AK025762  | 3q11.2   |
| 219544_at   | 15 | FLJ22624           | NM_024808 | 13q21.33 |
| 218454_at   | 15 | FLJ22662           | NM_024829 | 12p13.2  |
| 220486_x_at | 15 | FLJ22679           | NM_017698 | Xq22.3   |
| 218248_at   | 15 | FLJ22794           | NM_022074 | 11q12.2  |
| 220602_s_at | 11 | FLJ22795           | NM_025084 | 15q25.1  |
| 219880_at   | 15 | FLJ23053           | NM_022907 | 5q35.3   |
| 221958_s_at | 15 | FLJ23091           | AA775681  | 1p31.2   |
| 219747_at   | 13 | FLJ23191           | NM_024574 | 4q27     |
| 221208_s_at | 15 | FLJ23342           | NM_024631 | 11q24.2  |
| 218916_at   | 15 | FLJ23436           | NM_024671 | 16p11.2  |
| 219217_at   | 15 | FLJ23441           | NM_024678 | 11q13.4  |
| 218647_s_at | 14 | FLJ23476           | BE464161  | 1p34.2   |
| 216044_x_at | 15 | FLJ23493           | AK027146  | 1p22.1   |
| 219487_at   | 15 | FLJ23560           | NM_024685 | 12q21.1  |
| 215046_at   | 13 | FLJ23861           | AL133053  | 2q34     |
| 211034_s_at | 15 | FLJ30092           | BC006270  | 12q24.13 |
| 212532_s_at | 15 | FLJ30656           | AW873564  | ---      |
| 218017_s_at | 13 | FLJ32731           | NM_025070 | 8p11.1   |
| 216791_at   | 10 | FLJ33318           | AK026449  | ---      |
| 219221_at   | 15 | FLJ35036           | NM_024724 | 3q23     |
| 212547_at   | 15 | FLJ35348           | N34842    | 9q34.3   |

|             |    |          |           |                |
|-------------|----|----------|-----------|----------------|
| 215143_at   | 15 | FLJ36166 | AL049437  | 7q22.1         |
| 217608_at   | 14 | FLJ36754 | AW408767  | 5q12.3         |
| 213294_at   | 15 | FLJ38348 | AV755522  | 2p22.3         |
| 212791_at   | 15 | FLJ38984 | AL042729  | 1p34.3         |
| 219817_at   | 10 | FLJ39616 | NM_016534 | 12q24.13       |
| 64432_at    | 15 | FLJ39616 | W05463    | 12q24.13       |
| 222052_at   | 15 | FLJ41131 | AA001552  | 19q13.2        |
| 214902_x_at | 14 | FLJ42393 | AL080232  | ---            |
| 217419_x_at | 15 | FLJ45064 | AK021586  | 1p36.33        |
| 208904_s_at | 15 | FLJ46061 | BF431363  | 19p13.2        |
| 213715_s_at | 14 | FLJ46061 | AF070591  | 19p13.3        |
| 35254_at    | 15 | fln29    | AB007447  | 12q            |
| 200859_x_at | 15 | FLNA     | NM_001456 | Xq28           |
| 213746_s_at | 15 | FLNA     | AW051856  | Xq28           |
| 214752_x_at | 15 | FLNA     | AI625550  | Xq28           |
| 207876_s_at | 15 | FLNC     | NM_001458 | 7q32-q35       |
| 208749_x_at | 15 | FLOT1    | AA507012  | 6p21.3         |
| 210142_x_at | 15 | FLOT1    | AF117234  | 6p21.3         |
| 201350_at   | 15 | FLOT2    | NM_004475 | 17q11-q12      |
| 209004_s_at | 15 | FLR1     | AF142481  | 4p15.33        |
| 204358_s_at | 14 | FLRT2    | NM_013231 | 14q24-q32      |
| 204359_at   | 15 | FLRT2    | NM_013231 | 14q24-q32      |
| 219250_s_at | 12 | FLRT3    | NM_013281 | 20p11          |
| 222033_s_at | 15 | FLT1     | AA058828  | 13q12          |
| 211726_s_at | 15 | FMO2     | BC005894  | 1q23-q25       |
| 206263_at   | 14 | FMO4     | NM_002022 | 1q23-q25       |
| 202709_at   | 15 | FMOD     | NM_002023 | 1q32           |
| 203689_s_at | 14 | FMR1     | AI743037  | Xq27.3         |
| 215245_x_at | 14 | FMR1     | AA830884  | Xq27.3         |
| 210495_x_at | 15 | FN1      | AF130095  | 2q34           |
| 211719_x_at | 15 | FN1      | BC005858  | 2q34 /// 2q34  |
| 212464_s_at | 15 | FN1      | X02761    | 2q34           |
| 214701_s_at | 10 | FN1      | AJ276395  | 2q34           |
| 216442_x_at | 15 | FN1      | AK026737  | 2q34           |
| 218210_at   | 14 | FN3KRP   | NM_024619 | 17q25.3        |
| 219806_s_at | 15 | FN5      | NM_020179 | 11q13.3-q23.3  |
| 212288_at   | 15 | FNBP1    | AB011126  | 9q34           |
| 213940_s_at | 12 | FNBP1    | AU145053  | 9q34           |
| 215017_s_at | 15 | FNBP1L   | AW270932  | 1p22.1         |
| 213729_at   | 15 | FNBP3    | Z78308    | 2q24.1         |
| 218053_at   | 15 | FNBP3    | NM_017892 | 2q24.1         |
| 212232_at   | 15 | FNBP4    | AB023231  | 11p11.2-p11.12 |
| 202304_at   | 15 | FNDC3A   | NM_014923 | 13q14.12       |
| 218618_s_at | 15 | FNDC3B   | NM_022763 | 3q26.31        |
| 200090_at   | 15 | FNTA     | BG168896  | 8p22-q11       |
| 209189_at   | 15 | FOS      | BC004490  | 14q24.3        |
| 218880_at   | 11 | FOSL2    | NM_024530 | 2p23-p22       |
| 213260_at   | 15 | FOXC1    | AU145890  | 6p25           |
| 203734_at   | 15 | FOXJ2    | NM_018416 | 12p13.31       |
| 206015_s_at | 15 | FOXJ3    | NM_014947 | 1pter-q31.3    |

|             |    |                 |           |                 |
|-------------|----|-----------------|-----------|-----------------|
| 217310_s_at | 10 | FOXJ3           | AK027075  | 1pter-q31.3     |
| 203064_s_at | 13 | FOXK2           | NM_004514 | 17q25           |
| 202580_x_at | 14 | FOXM1           | NM_021953 | 12p13           |
| 202724_s_at | 15 | FOXO1A          | NM_002015 | 13q14.1         |
| 204131_s_at | 15 | FOXO3A          | N25732    | ---             |
| 204132_s_at | 15 | FOXO3A          | NM_001455 | 6q21            |
| 215221_at   | 14 | FOXP1           | AK025064  | ---             |
| 205140_at   | 15 | FPGT            | NM_003838 | 1p31.1          |
| 212086_x_at | 15 | FPL             | AK026584  | 1q21.2-q21.3    |
| 209471_s_at | 15 | FPTA            | L00634    | 8p22-q11        |
| 41858_at    | 10 | FRAG1; MGC799   | AL049261  | 11p15.5         |
| 219889_at   | 13 | FRAT1           | NM_005479 | 10q24.2         |
| 209864_at   | 15 | FRAT2           | AB045118  | 10q24.1         |
| 203697_at   | 15 | FRE             | U91903    | 2qter           |
| 203698_s_at | 15 | FRE             | U91903    | 2qter           |
| 204145_at   | 15 | FRG1            | NM_004477 | 4q35            |
| 215160_x_at | 15 | FRG1            | AL441988  | ---             |
| 210220_at   | 12 | frizzled        | L37882    | 17q21.1         |
| 213056_at   | 15 | FRMD4B          | AU145019  | 3p14.2          |
| 209903_s_at | 14 | FRP1            | U49844    | 3q22-q24        |
| 201564_s_at | 13 | FSCN1           | NM_003088 | 7p22            |
| 200601_at   | 15 | FSGS; FSGS1     | U48734    | 19q13 /// 19q13 |
| 208310_s_at | 15 | FSTL1           | NM_007085 | 3q13.33         |
| 208782_at   | 15 | FSTL1           | BC000055  | 3q13.33         |
| 200748_s_at | 15 | FTH1            | NM_002032 | 11q13           |
| 214211_at   | 15 | FTH1            | AA083483  | 11q13           |
| 211628_x_at | 15 | FTHP1           | J04755    | --- /// ---     |
| 212788_x_at | 15 | FTL             | BG537190  | 19q13.3-q13.4   |
| 213187_x_at | 15 | FTL             | BG538564  | 19q13.3-q13.4   |
| 209702_at   | 15 | FTO             | U79260    | 16q12.2         |
| 218373_at   | 15 | FTS             | NM_022476 | 16q12.2         |
| 216304_x_at | 15 | FTSH            | AJ295618  | 10p14           |
| 205324_s_at | 15 | FTSJ1           | NM_012280 | Xp11.23         |
| 218356_at   | 12 | FTSJ2           | NM_013393 | 7p22            |
| 218103_at   | 15 | FTSJ3           | NM_017647 | 17q23           |
| 203091_at   | 15 | FUBP1           | NM_003902 | 1p31.1          |
| 212847_at   | 15 | FUBP1           | AL036840  | 1p31.1          |
| 214093_s_at | 15 | FUBP1           | AA156865  | 1p31.1          |
| 202838_at   | 15 | FUCA1           | NM_000147 | 1p34            |
| 201945_at   | 15 | FURIN           | NM_002569 | 15q26.1         |
| 200959_at   | 15 | FUS             | NM_004960 | 16p11.2         |
| 215744_at   | 10 | FUS             | AW514140  | 16p11.2         |
| 217370_x_at | 12 | FUS             | S75762    | 16p11.2         |
| 204299_at   | 15 | FUSIP1          | NM_021993 | ---             |
| 206095_s_at | 15 | FUSIP1          | NM_006625 | 1p36.11         |
| 213594_x_at | 15 | FUSIP1          | AU130523  | 1p36.11         |
| 209578_s_at | 15 | FUT13; C21orf80 | BC000626  | 21q22.3         |
| 202419_at   | 15 | FVT1            | NM_002035 | 18q21.3         |
| 216091_s_at | 10 | FWD1            | AF101784  | 10q24.32        |
| 36936_at    | 15 | FX; P35B        | U58766    | 8q24.3          |

|             |    |                       |           |               |
|-------------|----|-----------------------|-----------|---------------|
| 217981_s_at | 15 | FXC1                  | W67995    | 11p15.5-p15.3 |
| 205565_s_at | 10 | FXN                   | NM_000144 | 9q13-q21.1    |
| 201635_s_at | 15 | FXR1                  | NM_005087 | 3q28          |
| 201636_at   | 15 | FXR1                  | BG025078  | 3q28          |
| 201637_s_at | 15 | FXR1                  | NM_005087 | 3q28          |
| 35265_at    | 15 | FXR2                  | AF044263  | 17p13.1       |
| 205384_at   | 15 | FXYD1                 | NM_005031 | 19q13.1       |
| 202488_s_at | 15 | FXYD3                 | NM_005971 | 19q13.13      |
| 218084_x_at | 15 | FXYD5                 | NM_014164 | 19q12-q13.1   |
| 217897_at   | 15 | FXYD6                 | NM_022003 | 11q23.3       |
| 218204_s_at | 15 | FYCO1                 | NM_024513 | 3p21.32       |
| 212486_s_at | 14 | FYN                   | N20923    | 6q21          |
| 209414_at   | 10 | FYR                   | AF083810  | 19p13.3       |
| 209416_s_at | 15 | FYR                   | AF083810  | 19p13.3       |
| 204451_at   | 15 | FZD1                  | NM_003505 | 7q21          |
| 218665_at   | 15 | FZD4                  | NM_012193 | 11q14.2       |
| 203987_at   | 15 | FZD6                  | NM_003506 | 8q22.3-q23.1  |
| 203706_s_at | 14 | FZD7                  | NM_003507 | 2q33          |
| 213524_s_at | 15 | G0S2                  | NM_015714 | 1q32.2-q41    |
| 205690_s_at | 15 | G10                   | NM_003910 | 7q22.1        |
| 215535_s_at | 15 | G15                   | AF007145  | 6p21.3        |
| 32836_at    | 15 | G15                   | U56417    | 6p21.3        |
| 205483_s_at | 15 | G1P2                  | NM_005101 | 1p36.33       |
| 204415_at   | 14 | G1P3                  | NM_022873 | 1p35          |
| 214772_at   | 12 | G2                    | H08993    | 11p13         |
| 208643_s_at | 15 | G22P1                 | J04977    | 2q35          |
| 214626_s_at | 13 | G2AN; Glul1; KIAA0088 | AK026548  | 11q12.3       |
| 201503_at   | 15 | G3BP                  | BG500067  | 5q33.1        |
| 206383_s_at | 11 | G3BP2                 | NM_012297 | 4q21.21       |
| 208840_s_at | 15 | G3BP2                 | AB014560  | 4q21.21       |
| 208841_s_at | 15 | G3BP2                 | AB014560  | 4q21.21       |
| 217398_x_at | 15 | G3PD                  | AK026525  | 12p13         |
| 37278_at    | 15 | G4.5                  | X92762    | Xq28          |
| 208659_at   | 15 | G6; NCC27             | AF034607  | 6p22.1-p21.2  |
| 214909_s_at | 15 | G6a                   | AK026191  | 6p21.3        |
| 221453_at   | 10 | G6PC2                 | NM_021176 | 2q24-q31      |
| 44654_at    | 15 | G6PC3                 | AI669655  | 17q21.31      |
| 209449_at   | 15 | G7b                   | AF196468  | 6p21.3        |
| 204332_s_at | 14 | GA; AGU; ASRG         | M64073    | 4q32-q33      |
| 219158_s_at | 12 | Ga19                  | AF327722  | 4q31.1        |
| 202812_at   | 15 | GAA                   | NM_000152 | 17q25.2-q25.3 |
| 207112_s_at | 14 | GAB1                  | NM_002039 | 4q31.1        |
| 214987_at   | 15 | GAB1                  | AL049449  | 4q31.1        |
| 200645_at   | 15 | GABARAP               | NM_007278 | 17p13.2       |
| 208868_s_at | 15 | GABARAPL1             | BF125756  | 12p13.31      |
| 208869_s_at | 15 | GABARAPL1             | BF125756  | 12p13.31      |
| 211458_s_at | 15 | GABARAPL3             | AF180519  | 15q26.1       |
| 209459_s_at | 15 | GABAT                 | AF237813  | 16p13.2       |
| 209460_at   | 15 | GABAT                 | AF237813  | 16p13.2       |
| 203146_s_at | 15 | GABBR1                | NM_001470 | 6p21.31       |

|             |    |                 |           |               |
|-------------|----|-----------------|-----------|---------------|
| 204618_s_at | 15 | GABPB2          | NM_005254 | 15q21.2       |
| 205510_s_at | 12 | GABPB2          | NM_017976 | 15q21.2       |
| 208463_at   | 13 | GABRA4          | NM_000809 | 4p12          |
| 207010_at   | 14 | GABRB1          | NM_000812 | 4p12          |
| 204537_s_at | 14 | GABRE           | NM_004961 | Xq28          |
| 37028_at    | 15 | GADD34          | U83981    | 19q13.2       |
| 203725_at   | 15 | GADD45A         | NM_001924 | 1p31.2-p31.1  |
| 207574_s_at | 15 | GADD45B         | NM_015675 | 19p13.3       |
| 209304_x_at | 15 | GADD45B         | AF087853  | 19p13.3       |
| 204121_at   | 14 | GADD45G         | NM_006705 | 9q22.1-q22.2  |
| 212891_s_at | 15 | GADD45GIP1      | BF972185  | 19p13.2       |
| 210879_s_at | 14 | GAF1            | AF334812  | 2p13-p12      |
| 204417_at   | 15 | GALC            | NM_000153 | 14q31         |
| 202528_at   | 10 | GALE            | NM_000403 | 1p36-p35      |
| 205219_s_at | 13 | GALK2           | NM_002044 | 15q15.3       |
| 203066_at   | 15 | GALNAC4S-6ST    | NM_014863 | 10q26         |
| 218871_x_at | 14 | GALNACT-2       | NM_018590 | 10q11.21      |
| 222235_s_at | 14 | GALNACT-2       | AL139812  | ---           |
| 201722_s_at | 15 | GALNT1          | NM_020474 | 18q12.1       |
| 201723_s_at | 15 | GALNT1          | NM_020474 | 18q12.1       |
| 201724_s_at | 15 | GALNT1          | NM_020474 | 18q12.1       |
| 219013_at   | 15 | GALNT11         | NM_022087 | 7q34-q36      |
| 217788_s_at | 15 | GALNT2          | NM_004481 | 1q41-q42      |
| 218313_s_at | 15 | GALNT7          | NM_017423 | 4q31.1        |
| 203179_at   | 15 | GALT            | NM_000155 | 9p13          |
| 205354_at   | 15 | GAMT            | NM_000156 | 19p13.3       |
| 211934_x_at | 13 | GANAB           | W87689    | 11q12.3       |
| 210621_s_at | 15 | GAP             | M23612    | 5q13.3        |
| 212581_x_at | 15 | GAPD            | BE561479  | 12p13         |
| 213453_x_at | 15 | GAPD            | BF689355  | 12p13         |
| 31874_at    | 14 | GAR22; MGC17243 | Y07846    | 22q12.2       |
| 213049_at   | 15 | GARNL1          | BG436400  | 14q13.2       |
| 214855_s_at | 15 | GARNL2          | AL050050  | 9q31          |
| 212378_at   | 15 | GART            | NM_000819 | 21q22.1       |
| 204457_s_at | 15 | GAS1            | NM_002048 | 9q21.3-q22    |
| 205848_at   | 15 | GAS2            | NM_005256 | 11p14.3-p15.2 |
| 210139_s_at | 15 | GAS3            | L03203    | 17p12-p11.2   |
| 1598_g_at   | 15 | GAS6            | L13720    | 13q34         |
| 202177_at   | 15 | GAS6            | NM_000820 | 13q34         |
| 202191_s_at | 15 | GAS7            | BE439987  | 17p           |
| 202192_s_at | 13 | GAS7            | NM_005890 | 17p           |
| 209984_at   | 12 | GASC-1          | AB037901  | 9p24-p23      |
| 209710_at   | 15 | GATA2           | AL563460  | 3q21.3        |
| 209604_s_at | 11 | GATA3           | AI796169  | 10p15         |
| 205517_at   | 15 | GATA4           | AV700724  | 8p23.1-p22    |
| 210002_at   | 15 | GATA6           | D87811    | 18q11.1-q11.2 |
| 208503_s_at | 15 | GATAD1          | NM_021167 | 7q21-q22      |
| 203178_at   | 14 | GATM            | NM_001482 | 15q15.1       |
| 201816_s_at | 15 | GBAS            | NM_001483 | 7p12          |
| 203282_at   | 15 | GBE1            | NM_000158 | 3p12.3        |

|             |    |             |           |               |
|-------------|----|-------------|-----------|---------------|
| 214835_s_at | 15 | G-BETA      | AF131748  | 3p14.3        |
| 208961_s_at | 14 | GBF         | AB017493  | 10p15         |
| 201439_at   | 15 | GBF1        | NM_004193 | 10q24         |
| 220587_s_at | 14 | GBL         | NM_022372 | 16p13.3       |
| 208631_s_at | 15 | GBP         | U04627    | 2p23          |
| 202269_x_at | 15 | GBP1        | NM_002053 | 1p22.2        |
| 201738_at   | 15 | GC20        | NM_005875 | 3p21.33       |
| 203765_at   | 15 | GCA         | NM_012198 | 2q24.3        |
| 36475_at    | 15 | GCAT        | Z97630    | 22q13.1       |
| 202832_at   | 15 | GCC2        | NM_014635 | 2q12.3        |
| 203500_at   | 13 | GCDH        | NM_000159 | 19p13.2       |
| 208369_s_at | 15 | GCDH        | NM_013976 | 19p13.2       |
| 204224_s_at | 15 | GCH1        | NM_000161 | 14q22.1-q22.2 |
| 204867_at   | 15 | GCHFR       | NM_005258 | 15q15         |
| 202922_at   | 15 | GCLC        | BF676980  | 6p12          |
| 202923_s_at | 12 | GCLC        | NM_001498 | 6p12          |
| 203925_at   | 15 | GCLM        | NM_002061 | 1p22.1        |
| 212139_at   | 15 | GCN1L1      | D86973    | 12q24.2       |
| 202182_at   | 15 | GCN5L2      | NM_021078 | 17q21         |
| 211555_s_at | 14 | GC-S-beta-1 | AF020340  | 4q31.3-q33    |
| 213133_s_at | 15 | GCSH        | AW237404  | 1q23.3        |
| 200008_s_at | 15 | GDI2        | NM_001494 | 10p15         |
| 200009_at   | 15 | GDI2        | NM_001494 | 10p15         |
| 201864_at   | 15 | GDIL        | D45021    | Xq28          |
| 216620_s_at | 15 | GEF10       | AF009205  | 8p23          |
| 204472_at   | 15 | GEM         | NM_005261 | 8q13-q21      |
| 219539_at   | 12 | GEMIN6      | NM_024775 | 2p22.3        |
| 203986_at   | 15 | GENX-3414   | NM_003943 | 4q24-q25      |
| 216041_x_at | 15 | GEP         | AK023348  | 17q21.32      |
| 210300_at   | 15 | GES         | AF152863  | 20q11.21      |
| 219821_s_at | 10 | GFOD1       | NM_018988 | 6pter-p22.1   |
| 202722_s_at | 15 | GFPT1       | NM_002056 | 2p13          |
| 205100_at   | 15 | GFPT2       | NM_005110 | 5q34-q35      |
| 45572_s_at  | 15 | GGA1        | AW009695  | 22q13.31      |
| 50277_at    | 15 | GGA1        | AW001443  | 22q13.31      |
| 208913_at   | 15 | GGA2        | AA868560  | 16p12         |
| 208914_at   | 12 | GGA2        | AW874641  | 16p12         |
| 208915_s_at | 11 | GGA2        | AF190863  | 16p12         |
| 210658_s_at | 15 | GGA2        | BC000284  | 16p12         |
| 213772_s_at | 15 | GGA2        | BF196572  | 16p12         |
| 209411_s_at | 12 | GGA3        | AW008018  | 17q25.2       |
| 205351_at   | 13 | GGCX        | NM_000821 | 2p12          |
| 214005_at   | 15 | GGCX        | BE326952  | 2p12          |
| 214006_s_at | 12 | GGCX        | BE326952  | 2p12          |
| 203560_at   | 15 | GGH         | NM_003878 | 8q12.2        |
| 202321_at   | 14 | GGPS1       | AW299507  | 1q43          |
| 202322_s_at | 15 | GGPS1       | AW299507  | 1q43          |
| 207131_x_at | 14 | GGT1        | NM_013430 | 22q11.23      |
| 209180_at   | 15 | GGTB        | U49245    | 1p31          |
| 209181_s_at | 15 | GGTB        | U49245    | 1p31          |



|             |    |                 |           |               |
|-------------|----|-----------------|-----------|---------------|
| 209248_at   | 15 | GHITM           | AL136713  | 10q23.2       |
| 209249_s_at | 15 | GHITM           | AF131820  | 10q23.2       |
| 205498_at   | 15 | GHR             | NM_000163 | 5p13-p12      |
| 219243_at   | 13 | GIMAP4          | NM_018326 | 7q36.1        |
| 218805_at   | 11 | GIMAP5          | NM_018384 | 7q36.1        |
| 64064_at    | 14 | GIMAP5          | AI435089  | 7q36.1        |
| 219777_at   | 15 | GIMAP6          | NM_024711 | 7q36.1        |
| 207525_s_at | 15 | GIPC1           | NM_005716 | 19p13.1       |
| 218030_at   | 13 | GIT1            | NM_014030 | 17p11.2       |
| 201667_at   | 15 | GJA1            | NM_000165 | 6q21-q23.2    |
| 204904_at   | 13 | GJA4            | NM_002060 | 1p35.1        |
| 40687_at    | 15 | GJA4            | M96789    | 1p35.1        |
| 214430_at   | 15 | GLA             | NM_000169 | Xq22          |
| 201576_s_at | 13 | GLB1            | NM_000404 | 3p21.33       |
| 213552_at   | 14 | GLCE            | W87398    | 15q22.31      |
| 211600_at   | 15 | GLEPP1          | U20489    | 12p13.3-p13.2 |
| 207966_s_at | 15 | GLG1            | NM_012201 | 16q22-q23     |
| 212045_at   | 14 | GLG1            | N32761    | 16q22-q23     |
| 207034_s_at | 11 | GLI2            | NM_030379 | 2q14          |
| 207153_s_at | 13 | GLMN            | NM_007070 | 1p22.1        |
| 200681_at   | 15 | GLO1            | NM_006708 | 6p21.3-p21.1  |
| 205279_s_at | 15 | GLRB            | AF094754  | 4q31.3        |
| 205280_at   | 13 | GLRB            | NM_000824 | 4q31.3        |
| 206662_at   | 15 | GLRX            | NM_002064 | 5q14          |
| 219933_at   | 15 | GLRX2           | NM_016066 | 1q31.2-q31.3  |
| 203159_at   | 15 | GLS             | AB020645  | 2q32-q34      |
| 221510_s_at | 15 | GLS             | AI828035  | 2q32-q34      |
| 218473_s_at | 15 | GLT25D1         | NM_024656 | 19p13.12      |
| 219015_s_at | 15 | GLT28D1         | BC005336  | Xq23          |
| 218146_at   | 15 | GLT8D1          | NM_018446 | 3p21.31       |
| 218147_s_at | 15 | GLT8D1          | NM_018446 | 3p21.31       |
| 221447_s_at | 11 | GLT8D2          | NM_031302 | 12q /// 12q   |
| 217807_s_at | 15 | GLTSCR2         | NM_015710 | 19q13.3       |
| 200946_x_at | 15 | GLUD1           | AI339331  | 10q23.3       |
| 200947_s_at | 15 | GLUD1           | NM_005271 | 10q23.3       |
| 200648_s_at | 13 | GLUL            | NM_002065 | 1q31          |
| 215001_s_at | 15 | GLUL            | AL161952  | 1q31          |
| 217202_s_at | 15 | GLUL            | U08626    | ---           |
| 214864_s_at | 15 | GLXR            | AK024386  | 9q12          |
| 216308_x_at | 15 | GLXR            | AK026752  | 9q12          |
| 35436_at    | 15 | GM130; MGC20672 | L06147    | 9q34.13       |
| 208798_x_at | 15 | GM88            | AF204231  | 15q11.2       |
| 218458_at   | 14 | GMCL1L          | NM_022471 | 5q35.3        |
| 204875_s_at | 13 | GMDS            | NM_001500 | 6p25          |
| 214106_s_at | 11 | GMDS            | AI762113  | 6p25          |
| 222251_s_at | 11 | GMEB2           | AL133646  | 20q13.33      |
| 44146_at    | 14 | GMEB2           | AA045183  | 20q13.33      |
| 202543_s_at | 15 | GMFB            | BC005359  | 14q22.2       |
| 202544_at   | 15 | GMFB            | NM_004124 | 14q22.2       |
| 204220_at   | 15 | GMFG            | NM_004877 | 19q13.2       |

|             |    |        |           |                 |
|-------------|----|--------|-----------|-----------------|
| 218350_s_at | 15 | GMNN   | NM_015895 | 6p22.1          |
| 208761_s_at | 15 | GMP1   | U83117    | 2q33            |
| 218070_s_at | 15 | GMPPA  | NM_013335 | 2q36.1          |
| 204187_at   | 15 | GMPR   | NM_006877 | 6p23            |
| 217990_at   | 15 | GMPR2  | NM_016576 | 14q11.2         |
| 214431_at   | 15 | GMPS   | NM_003875 | 3q24            |
| 213766_x_at | 15 | GNA11  | N36926    | 19p13.3         |
| 213944_x_at | 15 | GNA11  | BG236220  | 19p13.3         |
| 40562_at    | 15 | GNA11  | AF011499  | 19p13.3         |
| 564_at      | 15 | GNA11  | M69013    | 19p13.3         |
| 201179_s_at | 14 | GNAI1  | J03005    | 1p13            |
| 209576_at   | 15 | GNAI1  | AL049933  | 7q21            |
| 201040_at   | 11 | GNAI2  | NM_002070 | 3p21            |
| 201181_at   | 14 | GNAI3  | NM_006496 | 1p13            |
| 204762_s_at | 13 | GNAO1  | NM_020988 | 16q13           |
| 202615_at   | 15 | GNAQ   | BF222895  | ---             |
| 200780_x_at | 15 | GNAS   | NM_000516 | 20q13.2-q13.3   |
| 200981_x_at | 15 | GNAS   | NM_016592 | 20q13.2-q13.3   |
| 212273_x_at | 15 | GNAS   | AI591100  | 20q13.2-q13.3   |
| 214157_at   | 12 | GNAS   | AA401492  | 20q13.2-q13.3   |
| 217673_x_at | 15 | GNAS   | AA650558  | ---             |
| 200744_s_at | 15 | GNB1   | NM_002074 | 1p36.33         |
| 200745_s_at | 15 | GNB1   | AF070603  | 1p36.33         |
| 200746_s_at | 15 | GNB1   | NM_002074 | 1p36.33         |
| 200852_x_at | 15 | GNB2   | NM_005273 | 7q21.3-q22.1    |
| 200651_at   | 15 | GNB2L1 | NM_006098 | 5q35.3          |
| 222034_at   | 15 | GNB2L1 | AA443762  | 5q35.3          |
| 204000_at   | 14 | GNB5   | NM_016194 | 15q21.1         |
| 205042_at   | 15 | GNE    | NM_005476 | 9p13.1          |
| 204115_at   | 15 | GNG11  | NM_004126 | 7q31-q32        |
| 212294_at   | 15 | GNG12  | BG111761  | 1p31.2          |
| 207157_s_at | 15 | GNG5   | NM_005274 | 1p22            |
| 206896_s_at | 15 | GNG7   | NM_005145 | 19p13.3         |
| 217629_at   | 11 | GNGT2  | AA365670  | ---             |
| 201948_at   | 15 | GNL2   | NM_013285 | 1p34.2          |
| 217850_at   | 15 | GNL3   | NM_014366 | 3p21.31         |
| 201956_s_at | 15 | GNPAT  | NM_014236 | 1q42.11-42.3    |
| 202382_s_at | 15 | GNPDA1 | NM_005471 | 5q21            |
| 213852_at   | 15 | GNRHR2 | BG289199  | 1q12            |
| 212334_at   | 15 | GNS    | AW167793  | 12q14           |
| 212335_at   | 15 | GNS    | AW167793  | 12q14           |
| 207447_s_at | 12 | GNTIVH | NM_013244 | 12q21           |
| 203384_s_at | 14 | GOLGA1 | NM_002077 | 9q34.11         |
| 202106_at   | 15 | GOLGA3 | NM_005895 | 12q24.33        |
| 201567_s_at | 15 | GOLGA4 | NM_002078 | 3p22-p21.3      |
| 215203_at   | 11 | GOLGA4 | AW438464  | 3p22-p21.3      |
| 210425_x_at | 15 | GOLGA5 | AF164622  | 15q11.2         |
| 218241_at   | 15 | GOLGA5 | NM_005113 | 14q32.12-q32.13 |
| 217819_at   | 15 | GOLGA7 | NM_016099 | 8p11.21         |
| 201056_at   | 15 | GOLGB1 | N53479    | ---             |

|             |    |                |           |                   |
|-------------|----|----------------|-----------|-------------------|
| 201057_s_at | 15 | GOLGB1         | NM_004487 | 3q13              |
| 213650_at   | 14 | GOLGIN-67      | AW006438  | 15q11.2           |
| 217771_at   | 12 | GOLPH2         | NM_016548 | 9q21.33           |
| 217803_at   | 15 | GOLPH3         | NM_022130 | 5p13.3            |
| 204324_s_at | 13 | GOLPH4         | NM_014498 | 3q26.2            |
| 218873_at   | 15 | GON4           | NM_017710 | ---               |
| 207812_s_at | 15 | GORASP2        | NM_015530 | 2q31.1-q31.2      |
| 208842_s_at | 15 | GORASP2        | W93787    | 2q31.1-q31.2      |
| 204630_s_at | 15 | GOSR1          | NM_004871 | 17q11             |
| 213020_at   | 13 | GOSR1          | AI814252  | 17q11             |
| 213021_at   | 15 | GOSR1          | AI741876  | 17q11             |
| 210009_s_at | 12 | GOSR2          | AF229796  | 17q21             |
| 213180_s_at | 15 | GOSR2          | BE895285  | 17q21             |
| 208813_at   | 15 | GOT1           | BC000498  | 10q24.1-q25.1     |
| 200708_at   | 15 | GOT2           | NM_002080 | 16q21             |
| 207389_at   | 12 | GP1BA          | NM_000173 | 17pter-p12        |
| 206655_s_at | 13 | GP1BB          | NM_000407 | 22q11.21-q11.23   |
| 201618_x_at | 14 | GPAA1          | NM_003801 | 8q24.3            |
| 211060_x_at | 15 | GPAA1          | BC006383  | 8q24.3 /// 8q24.3 |
| 215690_x_at | 15 | GPAA1          | AL157437  | 8q24.3            |
| 209433_s_at | 14 | GPAT           | U00238    | 4q12              |
| 209434_s_at | 10 | GPAT           | U00238    | 4q12              |
| 219078_at   | 14 | GPATC2         | NM_018040 | 1q41              |
| 218895_at   | 13 | GPATC3         | NM_022078 | 1p35.3-p35.1      |
| 202756_s_at | 15 | GPC1           | NM_002081 | 2q35-q37          |
| 209220_at   | 15 | GPC3           | L47125    | Xq26.1            |
| 204983_s_at | 14 | GPC4           | AF064826  | Xq26.1            |
| 212510_at   | 15 | GPD1L          | AA135522  | 3p22.3            |
| 211821_x_at | 13 | GPErik         | U00178    | 4q28.2-q31.1      |
| 220773_s_at | 15 | GPHN           | NM_020806 | 14q23.3-q24.1     |
| 208308_s_at | 15 | GPI            | NM_000175 | 19q13.1           |
| 218652_s_at | 14 | GPI7           | NM_017733 | 4p16.3            |
| 209707_at   | 15 | GPI8; MGC22559 | AF022913  | 1p31.1            |
| 200723_s_at | 15 | GPIAP1         | NM_005898 | 11p13             |
| 203776_at   | 15 | GPKOW          | NM_015698 | Xp11.23           |
| 209167_at   | 15 | GPM6B          | AI419030  | Xp22.2            |
| 209168_at   | 15 | GPM6B          | AW148844  | Xp22.2            |
| 209169_at   | 15 | GPM6B          | N63576    | Xp22.2            |
| 209170_s_at | 15 | GPM6B          | AI419030  | Xp22.2            |
| 201141_at   | 15 | GPNMB          | NM_002510 | 7p15              |
| 211977_at   | 15 | GPR107         | AK024651  | 9q34.2            |
| 211979_at   | 13 | GPR107         | AB046844  | 9q34.2            |
| 212950_at   | 15 | GPR116         | BF941499  | 6p21.1            |
| 212951_at   | 15 | GPR116         | N95226    | 6p21.1            |
| 65718_at    | 15 | GPR124         | AI655903  | 8p11.23           |
| 210473_s_at | 14 | GPR125         | M37712    | ---               |
| 213094_at   | 14 | GPR126         | AL033377  | ---               |
| 221902_at   | 10 | GPR153         | AL567940  | ---               |
| 214104_at   | 15 | GPR161         | AI703188  | 1q23.3            |
| 218855_at   | 12 | GPR175         | NM_016372 | 3q21.2            |

|             |    |          |           |                |
|-------------|----|----------|-----------|----------------|
| 221288_at   | 14 | GPR22    | NM_005295 | 7q22-q31.1     |
| 206960_at   | 13 | GPR23    | NM_005296 | Xq13-q21.1     |
| 221306_at   | 11 | GPR27    | NM_018971 | 3p21-p14       |
| 212070_at   | 13 | GPR56    | AL554008  | 16q13          |
| 220642_x_at | 15 | GPR89    | NM_016334 | 1p36.13-q31.3  |
| 204793_at   | 15 | GPRASP1  | NM_014710 | Xq22.1         |
| 203632_s_at | 15 | GPRC5B   | NM_016235 | 16p12          |
| 217782_s_at | 15 | GPS1     | NM_004127 | 17q25.3        |
| 209350_s_at | 15 | GPS2     | AL157493  | 17p13          |
| 213628_at   | 15 | GPSM2    | AA883493  | 1p13.3         |
| 221922_at   | 12 | GPSM2    | AW195581  | 1p13.3         |
| 208336_s_at | 10 | GPSN2    | NM_004868 | 19p13.13       |
| 200736_s_at | 15 | GPX1     | NM_000581 | 3p21.3         |
| 201348_at   | 15 | GPX3     | NM_002084 | 5q23           |
| 214091_s_at | 15 | GPX3     | AW149846  | 5q23           |
| 201106_at   | 15 | GPX4     | NM_002085 | 19p13.3        |
| 213170_at   | 15 | GPX7     | AA406605  | 1p32           |
| 216321_s_at | 15 | GR       | X03348    | 5q31           |
| 218706_s_at | 12 | GRAMD3   | NM_023927 | 5q23.3         |
| 209409_at   | 15 | GRB10    | D86962    | 7p12-p11.2     |
| 206204_at   | 13 | GRB14    | NM_004490 | 2q22-q24       |
| 201347_x_at | 15 | GRHPR    | NM_012203 | 9q12           |
| 212090_at   | 14 | GRINA    | AL571424  | 8q24.3         |
| 212241_at   | 15 | GRINL1A  | AI632774  | 15q22.1        |
| 212243_at   | 15 | GRINL1A  | BE645501  | 15q22.1        |
| 212244_at   | 15 | GRINL1A  | AL050091  | 15q22.1        |
| 204395_s_at | 11 | GRK5     | NM_005308 | 10q24-qter     |
| 204396_s_at | 15 | GRK5     | NM_005308 | 10q24-qter     |
| 200678_x_at | 15 | GRN      | NM_002087 | 17q21.32       |
| 211284_s_at | 15 | GRN      | BC000324  | 17q21.32       |
| 209774_x_at | 11 | gro-beta | M57731    | 4q21           |
| 212432_at   | 13 | GRPEL1   | AL542571  | 4p16           |
| 212434_at   | 15 | GRPEL1   | AI984421  | 4p16           |
| 201501_s_at | 15 | GRSF1    | NM_002092 | 4q13           |
| 201520_s_at | 15 | GRSF1    | BF034561  | 4q13           |
| 215030_at   | 15 | GRSF1    | AK023187  | 4q13           |
| 209276_s_at | 15 | GRX      | AF162769  | 5q14           |
| 209025_s_at | 15 | GRY-RBP  | AF037448  | 6q14-q15       |
| 209515_s_at | 11 | GS2      | U38654    | 15q15-q21.1    |
| 210951_x_at | 10 | GS2      | AF125393  | 15q15-q21.1    |
| 218154_at   | 13 | GSDMDC1  | NM_024736 | 8q24.3         |
| 211630_s_at | 15 | gsh-s    | L42531    | ---            |
| 632_at      | 15 | GSK3A    | L40027    | 19q13.31       |
| 209945_s_at | 15 | GSK3B    | BC000251  | 3q13.3         |
| 200696_s_at | 15 | GSN      | NM_000177 | 9q33           |
| 201912_s_at | 15 | GSPT1    | NM_002094 | 16p13.1        |
| 215438_x_at | 15 | GSPT1    | BE906054  | 16p13.1        |
| 205541_s_at | 14 | GSPT2    | NM_018094 | Xp11.23-p11.21 |
| 201415_at   | 14 | GSS      | NM_000178 | 20q11.2        |
| 210912_x_at | 15 | GST      | M99422    | 1p13.3         |

|             |    |             |           |               |
|-------------|----|-------------|-----------|---------------|
| 215766_at   | 15 | GSTA1       | AL096729  | 6p12.1        |
| 202967_at   | 15 | GSTA4       | NM_001512 | 6p12.1        |
| 217751_at   | 15 | GSTK1       | NM_015917 | 7q35          |
| 204550_x_at | 15 | GSTM1       | NM_000561 | 1p13.3        |
| 204418_x_at | 15 | GSTM2       | NM_000848 | 1p13.3        |
| 202554_s_at | 15 | GSTM3       | AL527430  | 1p13.3        |
| 204149_s_at | 10 | GSTM4       | NM_000850 | 1p13.3        |
| 205752_s_at | 14 | GSTM5       | NM_000851 | 1p13.3        |
| 201470_at   | 15 | GSTO1       | NM_004832 | 10q25.1       |
| 200824_at   | 15 | GSTP1       | NM_000852 | 11q13         |
| 203815_at   | 13 | GSTT1       | NM_000853 | 22q11.23      |
| 210088_x_at | 15 | GT1         | M36172    | 17q21-qter    |
| 201883_s_at | 14 | GT1         | D29805    | 9p13          |
| 209617_s_at | 15 | GT24; NPRAP | AF035302  | 5p15.2        |
| 211450_s_at | 10 | GTBP        | D89646    | 2p16          |
| 219770_at   | 15 | GTDC1       | NM_024659 | 2q22.3-q23.1  |
| 220853_at   | 12 | GTDC1       | NM_014118 | 2q22.3-q23.1  |
| 202678_at   | 15 | GTF2A2      | NM_004492 | 15q21.3       |
| 208066_s_at | 15 | GTF2B       | NM_001514 | 1p22-p21      |
| 205930_at   | 15 | GTF2E1      | NM_005513 | 3q21-q24      |
| 202680_at   | 15 | GTF2E2      | NM_002095 | 8p21-p12      |
| 202355_s_at | 15 | GTF2F1      | BC000120  | 19p13.3       |
| 202356_s_at | 15 | GTF2F1      | NM_002096 | 19p13.3       |
| 209595_at   | 14 | GTF2F2      | BC001771  | 13q14         |
| 202451_at   | 15 | GTF2H1      | BC000365  | 11p15.1-p14   |
| 202453_s_at | 15 | GTF2H1      | BC000365  | 11p15.1-p14   |
| 222104_x_at | 12 | GTF2H3      | AI569458  | 12q24.31      |
| 203577_at   | 15 | GTF2H4      | NM_001517 | 6p21.3        |
| 213357_at   | 15 | GTF2H5      | AV701318  | ---           |
| 201065_s_at | 15 | GTF2I       | NM_001518 | 7q11.23       |
| 210891_s_at | 15 | GTF2I       | AF035737  | 7q11.23       |
| 218412_s_at | 10 | GTF2IRD1    | NM_016328 | 7q11.23       |
| 201338_x_at | 15 | GTF3A       | NM_002097 | 13q12.3-q13.1 |
| 215091_s_at | 15 | GTF3A       | BE542815  | 13q12.3-q13.1 |
| 204366_s_at | 14 | GTF3C2      | NM_001521 | 2p23.3        |
| 212429_s_at | 14 | GTF3C2      | AW194657  | 2p23.3        |
| 218343_s_at | 15 | GTF3C3      | NM_012086 | 2q33.1        |
| 210794_s_at | 15 | GTL2        | AF119863  | 14q32         |
| 217957_at   | 15 | GTL3        | NM_013242 | 16q13         |
| 219357_at   | 11 | GTPBP1      | NM_014027 | 22q13.1       |
| 221050_s_at | 12 | GTPBP2      | NM_019096 | 6p21-p12      |
| 213835_x_at | 15 | GTPBP3      | AL524262  | 19p13.12      |
| 218238_at   | 15 | GTPBP4      | NM_012341 | 10p15-p14     |
| 218239_s_at | 15 | GTPBP4      | NM_012341 | 10p15-p14     |
| 203314_at   | 15 | GTPBP6      | NM_012227 | Xp22.33       |
| 212767_at   | 11 | GTPBP7      | BC004409  | 10q26.3       |
| 218088_s_at | 15 | GTR2        | AK023373  | 1p34          |
| 204318_s_at | 14 | GTSE1       | NM_016426 | 22q13.2-q13.3 |
| 211040_x_at | 15 | GTSE1       | BC006325  | 22q13.2-q13.3 |
| 215942_s_at | 14 | GTSE1       | BF973178  | 22q13.2-q13.3 |

|             |    |          |           |                       |
|-------------|----|----------|-----------|-----------------------|
| 221699_s_at | 15 | GU2      | AF334103  | 10q22.1 /// 10q22.1   |
| 221942_s_at | 15 | GUCY1A3  | AI719730  | 4q31.3-q33            |
| 203817_at   | 15 | GUCY1B3  | W93728    | 4q31.3-q33            |
| 200075_s_at | 15 | GUK1     | BC006249  | 1q32-q41 /// 1q32-q41 |
| 204237_at   | 15 | GULP1    | NM_016315 | 2q32.3-q33            |
| 202605_at   | 15 | GUSB     | NM_000181 | 7q21.11               |
| 215938_s_at | 11 | GVI      | AK001290  | 22q13.1               |
| 211275_s_at | 15 | GYG      | AF087942  | 3q24-q25.1            |
| 201554_x_at | 15 | GYG1     | NM_004130 | 3q24-q25.1            |
| 214407_x_at | 11 | GYPA     | AI240545  | 4q28-q31              |
| 207459_x_at | 10 | GYPB     | NM_002100 | 4q28-q31              |
| 202947_s_at | 15 | GYPC     | NM_002101 | 2q14-q21              |
| 201673_s_at | 15 | GYS1     | NM_002103 | 19q13.3               |
| 215388_s_at | 15 | H 36-2   | X56210    | 1q32                  |
| 221667_s_at | 15 | H11      | AF133207  | 12q24.23              |
| 208886_at   | 15 | H1F0     | BC000145  | 22q13.1               |
| 204805_s_at | 15 | H1FX     | NM_006026 | 3q21.3                |
| 211535_s_at | 15 | H2       | M60485    | 8p11.2-p11.1          |
| 215404_x_at | 13 | H2       | AK024388  | 8p11.2-p11.1          |
| 214500_at   | 15 | H2A.y    | AF044286  | 5q31.3-q32            |
| 214501_s_at | 15 | H2A.y    | AF044286  | 5q31.3-q32            |
| 220936_s_at | 11 | H2AFJ    | NM_018267 | 12p12                 |
| 202487_s_at | 15 | H2AFV    | NM_012412 | 7p13                  |
| 212205_at   | 15 | H2AFV    | AA534860  | 7p13                  |
| 205436_s_at | 15 | H2AFX    | NM_002105 | 11q23.2-q23.3         |
| 213344_s_at | 15 | H2AFX    | H51429    | 11q23.2-q23.3         |
| 207168_s_at | 15 | H2AFY    | NM_004893 | 5q31.3-q32            |
| 220375_s_at | 13 | H2AFY    | NM_024752 | 5q31.3-q32            |
| 200853_at   | 15 | H2AFZ    | NM_002106 | 4q24                  |
| 213911_s_at | 15 | H2AFZ    | BF718636  | 4q24                  |
| 216323_x_at | 14 | H2-ALPHA | K03460    | ---                   |
| 208579_x_at | 13 | H2BFS    | NM_017445 | 21q22.3               |
| 216885_s_at | 14 | H326     | AK026481  | 1q22-q23              |
| 200080_s_at | 15 | H3F3A    | AI955655  | 1q41                  |
| 208755_x_at | 15 | H3F3A    | BF312331  | 1q41                  |
| 211940_x_at | 15 | H3F3A    | BE869922  | 1q41                  |
| 213826_s_at | 15 | H3F3A    | AA292281  | 1q41                  |
| 213828_x_at | 15 | H3F3A    | AA477655  | 1q41                  |
| 209069_s_at | 15 | H3F3B    | BC001124  | 17q25                 |
| 211997_x_at | 15 | H3F3B    | NM_005324 | 17q25                 |
| 211998_at   | 15 | H3F3B    | Z48950    | 17q25                 |
| 211999_at   | 15 | H3F3B    | Z48950    | 17q25                 |
| 212010_s_at | 15 | H41      | AK025647  | 3q22.1                |
| 213554_s_at | 14 | H41      | AI928407  | 3q22.1                |
| 209620_s_at | 15 | hABC7    | AB005289  | Xq12-q13              |
| 202282_at   | 15 | HADH2    | NM_004493 | Xp11.2                |
| 208629_s_at | 14 | HADHA    | BG472176  | 2p23                  |
| 208630_at   | 15 | HADHA    | AI972144  | 2p23                  |
| 201007_at   | 15 | HADHB    | NM_000183 | 2p23                  |

|             |    |                  |           |                     |
|-------------|----|------------------|-----------|---------------------|
| 201035_s_at | 15 | HADHSC           | BC000306  | 4q22-q26            |
| 201036_s_at | 15 | HADHSC           | NM_005327 | 4q22-q26            |
| 205012_s_at | 15 | HAGH             | NM_005326 | 16p13.3             |
| 220491_at   | 15 | HAMP             | NM_021175 | 19q13.1             |
| 221744_at   | 15 | HAN11            | AW575465  | 17q24.2             |
| 221745_at   | 14 | HAN11            | AW575465  | 17q24.2             |
| 220138_at   | 15 | HAND1            | NM_004821 | 5q33                |
| 217020_at   | 13 | HAP; RRB2; NR1B2 | X04014    | ---                 |
| 202042_at   | 15 | HARS             | NM_002109 | 5q31.3              |
| 203138_at   | 15 | HAT1             | NM_003642 | 2q31.2-q33.1        |
| 201145_at   | 15 | HAX1             | NM_006118 | 1q22                |
| 200077_s_at | 15 | hAZ-brain        | D87914    | 19p13.3 /// 19p13.3 |
| 214438_at   | 15 | HB24             | M60721    | 1q41-q42.1          |
| 204018_x_at | 15 | HBA1             | NM_000558 | 16p13.3             |
| 209458_x_at | 15 | HBA1             | AF105974  | 16p13.3             |
| 211699_x_at | 15 | HBA1             | AF349571  | 16p13.3 /// 16p13.3 |
| 214414_x_at | 15 | HBA1             | T50399    | 16p13.3             |
| 217414_x_at | 15 | HBA1             | V00489    | ---                 |
| 211745_x_at | 15 | HBA2             | BC005931  | 16p13.3 /// 16p13.3 |
| 211696_x_at | 15 | HBB              | AF349114  | 11p15.5 /// 11p15.5 |
| 217232_x_at | 15 | HBB              | AF059180  | ---                 |
| 209116_x_at | 15 | HBD              | M25079    | 11p15.5             |
| 205919_at   | 14 | HBE1             | NM_005330 | 11p15.5             |
| 203821_at   | 12 | HBEGF            | NM_001945 | 5q23                |
| 204848_x_at | 15 | HBG1             | NM_000559 | 11p15.5             |
| 204419_x_at | 15 | HBG2             | NM_000184 | 11p15.5             |
| 213515_x_at | 15 | HBG2             | AI133353  | 11p15.5             |
| 210973_s_at | 10 | HBGF-R           | M63889    | 8p11.2-p11.1        |
| 209273_s_at | 15 | HBLD2            | BG387555  | 9q22.1              |
| 209274_s_at | 15 | HBLD2            | BC002675  | 9q22.1              |
| 221425_s_at | 15 | HBLD2            | NM_030940 | 9q22.1 /// 9q22.1   |
| 209466_x_at | 15 | HBNF-1           | M57399    | 7q33-q34            |
| 209102_s_at | 15 | HBP1             | AF019214  | 7q22-q31            |
| 209316_s_at | 15 | HBS1L            | BC001465  | 6q23-q24            |
| 215786_at   | 10 | HBXAP            | AK022170  | ---                 |
| 218166_s_at | 14 | HBXAP            | NM_016578 | 11q13.4             |
| 202299_s_at | 15 | HBXIP            | NM_006402 | 1p13.2              |
| 202300_at   | 15 | HBXIP            | NM_006402 | 1p13.2              |
| 209092_s_at | 15 | HC71; CGI-150    | AF061730  | 17p13.3             |
| 218345_at   | 15 | HCA112           | NM_018487 | 7q36.1              |
| 209259_s_at | 15 | HCAP             | AF020043  | 10q25               |
| 204207_s_at | 10 | hCAP1a           | AB012142  | 6q16                |
| 218662_s_at | 15 | HCAP-G           | NM_022346 | 4p16-p15            |
| 218663_at   | 14 | HCAP-G           | NM_022346 | 4p16-p15            |
| 203745_at   | 15 | HCCS             | AI801013  | Xp22.3              |
| 203746_s_at | 15 | HCCS             | NM_005333 | Xp22.3              |
| 210657_s_at | 15 | hcdcrel2b        | U88870    | 17q22-q23           |
| 202474_s_at | 13 | HCFC1            | NM_005334 | Xq28                |
| 45714_at    | 15 | HCFC1R1          | AA436930  | 16p13.3             |
| 219484_at   | 14 | HCFC2            | NM_013320 | 12q23.3             |

|             |    |                     |           |               |
|-------------|----|---------------------|-----------|---------------|
| 201534_s_at | 15 | HCG-1               | AF044221  | 13q12-q13     |
| 215985_at   | 10 | hcgVIII             | X92110    | ---           |
| 208018_s_at | 12 | HCK                 | NM_002110 | 20q11-q12     |
| 202957_at   | 15 | HCLS1               | NM_005335 | 3q13          |
| 217965_s_at | 15 | HCNGP               | NM_013260 | 17q25.3       |
| 37424_at    | 12 | HCR                 | AB029343  | 6p21.3        |
| 37425_g_at  | 15 | HCR                 | AB029343  | 6p21.3        |
| 208978_at   | 15 | hCRP2               | U36190    | 14q32.3       |
| 201209_at   | 15 | HDAC1               | NM_004964 | 1p34          |
| 201833_at   | 15 | HDAC2               | NM_001527 | 6q21          |
| 216326_s_at | 15 | HDAC3               | AF059650  | ---           |
| 206846_s_at | 15 | HDAC6               | NM_006044 | Xp11.23       |
| 217937_s_at | 10 | HDAC7A              | NM_016596 | 12q13.1       |
| 205659_at   | 15 | HDAC9               | NM_014707 | 7p21.1        |
| 212785_s_at | 15 | HDCMA18P            | AA160181  | 4q26          |
| 203260_at   | 11 | HDDC2               | NM_016063 | 6q13-q24.3    |
| 200896_x_at | 15 | HDGF                | NM_004494 | Xq25          |
| 216484_x_at | 15 | HDGF                | L24521    | Xq25          |
| 216693_x_at | 15 | HDGFRP3             | AL133102  | 15q11.2       |
| 209524_at   | 15 | HDGFRP3             | AK001280  | 15q11.2       |
| 203974_at   | 15 | HDHD1A              | NM_012080 | Xp22.32       |
| 209190_s_at | 11 | HDIA1               | AF051782  | 5q31          |
| 200643_at   | 14 | HDLBP               | NM_005336 | 2q37          |
| 221767_x_at | 15 | HDLBP               | AA515560  | 2q37          |
| 208846_s_at | 15 | HD-VDAC3            | U90943    | 8p11.2        |
| 209606_at   | 13 | HE                  | L06633    | 2q11.2        |
| 204370_at   | 15 | HEAB                | NM_006831 | 11q12         |
| 209657_s_at | 15 | heat shock factor 2 | M65217    | 6q22.32       |
| 218594_at   | 15 | HEATR1              | NM_018072 | 1q42.3        |
| 218450_at   | 15 | HEBP1               | NM_015987 | 12p13.2       |
| 203430_at   | 15 | HEBP2               | NM_014320 | 6q24          |
| 218603_at   | 15 | HECA                | NM_016217 | 6q23-q24      |
| 218632_at   | 15 | HECTD3              | NM_024602 | ---           |
| 209572_s_at | 15 | HEED; WAIT1         | AF080227  | 11q14.2-q22.3 |
| 212822_at   | 10 | HEG                 | AA121502  | 3q21.2        |
| 213069_at   | 14 | HEG                 | AI148659  | 3q21.2        |
| 203674_at   | 15 | HELZ                | NM_014877 | 17q24.3       |
| 218620_s_at | 12 | HEMK1               | NM_016173 | 3p21.3        |
| 52159_at    | 15 | HEMK1               | W93807    | 3p21.3        |
| 203903_s_at | 15 | HEPH                | NM_014799 | Xq11-q12      |
| 218306_s_at | 15 | HERC1               | NM_003922 | 15q22         |
| 217902_s_at | 15 | HERC2               | NM_004667 | 15q13         |
| 219863_at   | 15 | HERC5               | NM_016323 | 4q22.1-q23    |
| 210036_s_at | 15 | HERG                | AB044806  | 7q35-q36      |
| 1487_at     | 15 | hERRa               | L38487    | 11q13         |
| 203394_s_at | 15 | HES1                | BE973687  | 3q28-q29      |
| 203395_s_at | 15 | HES1                | NM_005524 | 3q28-q29      |
| 215933_s_at | 15 | HEX                 | Z21533    | 10q23.33      |
| 201765_s_at | 15 | HEXA                | AL523158  | 15q23-q24     |
| 201944_at   | 15 | HEXB                | NM_000521 | 5q13          |



|             |    |            |           |                   |
|-------------|----|------------|-----------|-------------------|
| 202814_s_at | 15 | HEXIM1     | NM_006460 | 17q21.31          |
| 44783_s_at  | 15 | HEY1       | R61374    | 8q21              |
| 219743_at   | 15 | HEY2       | NM_012259 | 6q22.2-q22.33     |
| 201824_at   | 15 | HFB30      | AB022663  | 5q23.3-q31.1      |
| 206087_x_at | 13 | HFE        | NM_000410 | 6p21.3            |
| 211327_x_at | 12 | HFE        | AF149804  | 6p21.3            |
| 40148_at    | 11 | hFE65L     | U62325    | 4p14              |
| 202231_at   | 15 | hfl-B5     | NM_006360 | 11p13             |
| 202232_s_at | 15 | hfl-B5     | NM_006360 | 11p13             |
| 213082_s_at | 14 | hfrc       | AJ005866  | 9q22.33           |
| 213083_at   | 13 | hfrc       | AJ005866  | 9q22.33           |
| 211801_x_at | 10 | hfzo1      | AF329637  | 3q27.1            |
| 213592_at   | 15 | HG11       | X89271    | 11q12             |
| 217457_s_at | 11 | hGDS       | X63465    | 4q23-q25          |
| 209410_s_at | 14 | hGrb10zeta | AF000017  | 7p12-p11.2        |
| 217812_at   | 15 | HGRG8      | BC002559  | 14q12-q21         |
| 208615_s_at | 15 | HH13       | AF208850  | 1p35              |
| 208617_s_at | 15 | HH13       | AF208850  | 1p35              |
| 210695_s_at | 15 | HHCMA56    | U13395    | 16q23.3-q24.1     |
| 212255_s_at | 15 | HHD        | AK001684  | 3q21-q24          |
| 204689_at   | 15 | HHEX       | NM_001529 | 10q23.33          |
| 220387_s_at | 10 | HHLA3      | NM_007071 | 1p31.2            |
| 203711_s_at | 15 | HIBCH      | NM_014362 | 2q32.3            |
| 213374_x_at | 15 | HIBCH      | AW000964  | 2q32.3            |
| 211675_s_at | 15 | HIC        | AF054589  | 7q31.2 /// 7q31.2 |
| 212964_at   | 11 | HIC2       | AI912206  | 22q11.21          |
| 212966_at   | 13 | HIC2       | AL043112  | 22q11.21          |
| 200989_at   | 15 | HIF1A      | NM_001530 | 14q21-q24         |
| 59999_at    | 15 | HIF1AN     | W37897    | 10q24             |
| 219319_at   | 15 | HIF3A      | NM_022462 | 19q13.33          |
| 222123_s_at | 14 | HIF3A      | AK021881  | 19q13.33          |
| 221896_s_at | 15 | HIG1       | BE739519  | 3p21.33           |
| 218507_at   | 15 | HIG2       | NM_013332 | 7q32.2            |
| 217845_x_at | 15 | HIGD1A     | NM_014056 | 3p21.33           |
| 209107_x_at | 11 | Hin-2      | U19179    | 2p23              |
| 208826_x_at | 15 | HINT       | U27143    | 5q31.2            |
| 200093_s_at | 15 | HINT1      | N32864    | 5q31.2            |
| 207721_x_at | 15 | HINT1      | NM_005340 | 5q31.2            |
| 205425_at   | 12 | HIP1       | NM_005338 | 7q11.23           |
| 202346_at   | 15 | HIP2       | NM_005339 | 4p14              |
| 212291_at   | 11 | HIPK1      | AI393355  | 1p13.1            |
| 212293_at   | 14 | HIPK1      | BG111260  | 1p13.1            |
| 219028_at   | 13 | HIPK2      | NM_022740 | 7q32-q34          |
| 209687_at   | 15 | hIRH       | U19495    | 10q11.1           |
| 218946_at   | 15 | HIRIP5     | NM_015700 | 2p15-p13          |
| 203253_s_at | 14 | HISPPD1    | NM_015216 | 5q21.2            |
| 209398_at   | 15 | HIST1H1C   | BC002649  | 6p21.3            |
| 215071_s_at | 15 | HIST1H2AC  | AL353759  | ---               |
| 209911_x_at | 15 | HIST1H2BD  | BC002842  | 6p21.3            |
| 222067_x_at | 10 | HIST1H2BD  | AL353759  | 6p21.3            |

|             |    |             |           |                   |
|-------------|----|-------------|-----------|-------------------|
| 210387_at   | 12 | HIST1H2BG   | BC001131  | 6p21.3            |
| 209806_at   | 15 | HIST1H2BK   | BC000893  | 6p21.33           |
| 205967_at   | 13 | HIST1H4C    | NM_003542 | 6p21.3            |
| 208180_s_at | 10 | HIST1H4H    | NM_003543 | 6p21.3            |
| 214290_s_at | 15 | HIST2H2AA   | AI313324  | 1q21.3            |
| 218280_x_at | 15 | HIST2H2AA   | BC001629  | 1q21.3            |
| 202708_s_at | 15 | HIST2H2BE   | NM_003528 | 1q21-q23          |
| 221582_at   | 15 | HIST3H2A    | BC001193  | 1q42.13           |
| 204512_at   | 15 | HIVEP1      | NM_002114 | 6p24-p22.3        |
| 212641_at   | 13 | HIVEP2      | AL023584  | 6q23-q24          |
| 212642_s_at | 15 | HIVEP2      | AL023584  | 6q23-q24          |
| 209098_s_at | 12 | HJ1         | U73936    | 20p12.1-p11.23    |
| 209099_x_at | 15 | HJ1         | U73936    | 20p12.1-p11.23    |
| 200697_at   | 15 | HK1         | NM_000188 | 10q22             |
| 209186_at   | 15 | HK1         | M23114    | 12q23-q24.1       |
| 202934_at   | 15 | HK2         | AI761561  | 2p13              |
| 222029_x_at | 15 | HKE2        | NM_014260 | 6p21.3            |
| 215313_x_at | 15 | HLA-A       | AA573862  | 6p21.3            |
| 208729_x_at | 15 | HLA-B       | D83043    | 6p21.3            |
| 211911_x_at | 15 | HLA-B       | L07950    | 6p21.3 /// 6p21.3 |
| 213932_x_at | 15 | HLA-B       | AI923492  | 6p21.3            |
| 217456_x_at | 15 | HLA-B       | M31183    | 6p21.3            |
| 209140_x_at | 15 | HLA-B39     | L42024    | 6p21.3            |
| 214459_x_at | 15 | HLA-C       | M12679    | 6p21.3            |
| 211799_x_at | 15 | HLA-Cw*1701 | U62824    | 6p21.3            |
| 217478_s_at | 15 | HLA-DMA     | X76775    | ---               |
| 203932_at   | 15 | HLA-DMB     | NM_002118 | 6p21.3            |
| 211990_at   | 15 | HLA-DPA1    | M27487    | 6p21.3            |
| 211991_s_at | 15 | HLA-DPA1    | M27487    | 6p21.3            |
| 201137_s_at | 15 | HLA-DPB1    | NM_002121 | 6p21.3            |
| 212671_s_at | 10 | HLA-DQA1    | BG397856  | 6p21.3            |
| 211654_x_at | 11 | HLA-DQB1    | M17565    | 6p21.3 /// 6p21.3 |
| 208894_at   | 14 | HLA-DRA     | M60334    | 6p21.3            |
| 210982_s_at | 13 | HLA-DRA     | M60333    | 6p21.3            |
| 209312_x_at | 15 | HLA-DRB1    | U65585    | 6p21.3            |
| 215193_x_at | 15 | HLA-DRB1    | AJ297586  | 6p21.3            |
| 221491_x_at | 10 | HLA-DRB3    | U66825    | 6p21.3            |
| 208306_x_at | 15 | HLA-DRB4    | NM_021983 | 6p21.3            |
| 204670_x_at | 15 | HLA-DRB5    | NM_002125 | 6p21.3            |
| 200904_at   | 15 | HLA-E       | X56841    | 6p21.3            |
| 200905_x_at | 15 | HLA-E       | NM_005516 | 6p21.3            |
| 204806_x_at | 15 | HLA-F       | NM_018950 | 6p21.3            |
| 221875_x_at | 15 | HLA-F       | AW514210  | 6p21.3            |
| 221978_at   | 14 | HLA-F       | BE138825  | 6p21.3            |
| 222279_at   | 15 | HLA-F       | AI669379  | 6p21.3            |
| 211529_x_at | 15 | HLA-G       | M90684    | 6p21.3            |
| 211528_x_at | 15 | HLA-G2.2    | M90685    | 6p21.3            |
| 200878_at   | 15 | HLF         | AF052094  | 2p21-p16          |
| 208141_s_at | 15 | HLRC1       | NM_031304 | 19p13.3           |
| 211593_s_at | 15 | hMAST205    | AB047005  | 1p34.1 /// 1p34.1 |

|             |    |                    |           |                   |
|-------------|----|--------------------|-----------|-------------------|
| 203040_s_at | 15 | HMBS               | NM_000190 | 11q23.3           |
| 208668_x_at | 15 | HMG17              | BC003689  | 1p36.1            |
| 208980_s_at | 15 | HMG20              | M26880    | 12q24.3           |
| 218152_at   | 15 | HMG20A             | NM_018200 | 15q24             |
| 210719_s_at | 15 | HMG20B             | BC002552  | 19p13.3           |
| 65133_i_at  | 12 | HMGA1L4            | AI862454  | 2p13.1            |
| 208025_s_at | 14 | HMGA2              | NM_003483 | 12q15 /// 12q15   |
| 213486_at   | 10 | HMGA2              | BF435376  | 12q15             |
| 200679_x_at | 15 | HMGB1              | NM_002128 | 13q12             |
| 200680_x_at | 15 | HMGB1              | NM_002128 | 13q12             |
| 214938_x_at | 15 | HMGB1              | AF283771  | 13q12             |
| 208808_s_at | 15 | HMGB2              | BC000903  | 4q31              |
| 203744_at   | 15 | HMGB3              | NM_005342 | Xq28              |
| 212596_s_at | 15 | HMGBCG; THC211630  | AJ010070  | 22q13.1           |
| 212597_s_at | 15 | HMGBCG; THC211630  | AL079310  | 22q13.1           |
| 202772_at   | 15 | HMGCL              | NM_000191 | 1p36.1-p35        |
| 202539_s_at | 12 | HMGCR              | NM_000859 | 5q13.3-q14        |
| 202540_s_at | 13 | HMGCR              | NM_000859 | 5q13.3-q14        |
| 221750_at   | 15 | HMGCS1             | BG035985  | ---               |
| 200943_at   | 15 | HMGN1              | NM_004965 | 21q22.3           |
| 200944_s_at | 15 | HMGN1              | NM_004965 | 21q22.3           |
| 202579_x_at | 15 | HMGN4              | NM_006353 | 6p21.3            |
| 209786_at   | 15 | HMGN4              | BC001282  | 6p21.3            |
| 209787_s_at | 15 | HMGN4              | BC001282  | 6p21.3            |
| 209035_at   | 15 | hMK-1              | M69148    | 11p11.2           |
| 207165_at   | 15 | HMMR               | NM_012485 | 5q33.2-qter       |
| 203665_at   | 14 | HMOX1              | NM_002133 | 22q12             |
| 218120_s_at | 15 | HMOX2              | NM_002134 | 16p13.3           |
| 209421_at   | 15 | hMSH2              | U04045    | 2p22-p21          |
| 204112_s_at | 15 | HNMT               | NM_006895 | 2q22.1            |
| 211732_x_at | 13 | HNMT               | BC005907  | 2q22.1 /// 2q22.1 |
| 214280_x_at | 15 | HNRNPA1; MGC102835 | X79536    | 12q13.1           |
| 211930_at   | 15 | hnRNPA3            | AW080932  | 2q31.2            |
| 201054_at   | 15 | HNRPA0             | BE966599  | 5q31              |
| 201055_s_at | 15 | HNRPA0             | NM_006805 | 5q31              |
| 200016_x_at | 15 | HNRPA1             | NM_002136 | 12q13.1           |
| 213356_x_at | 15 | HNRPA1             | AL568186  | 12q13.1           |
| 221919_at   | 15 | HNRPA1             | AW450929  | 12q13.1           |
| 222040_at   | 15 | HNRPA1             | AI144007  | 12q13.1           |
| 205292_s_at | 15 | HNRPA2B1           | NM_002137 | 7p15              |
| 206809_s_at | 15 | HNRPA3             | NM_005758 | ---               |
| 211929_at   | 15 | HNRPA3             | BF195526  | 2q31.2            |
| 211931_s_at | 15 | HNRPA3             | BG505670  | Xq27.1            |
| 211932_at   | 15 | HNRPA3             | BF195526  | 2q31.2            |
| 211933_s_at | 15 | HNRPA3             | BF195526  | 2q31.2            |
| 201277_s_at | 15 | HNRPA3             | NM_004499 | 5q35.3            |
| 200014_s_at | 15 | HNRPA3             | NM_004500 | 14q11.2           |
| 200751_s_at | 15 | HNRPA3             | BE898861  | 14q11.2           |
| 212626_x_at | 15 | HNRPA3             | AA664258  | 14q11.2           |
| 214737_x_at | 15 | HNRPA3             | AV725195  | 14q11.2           |

|             |    |             |           |                 |
|-------------|----|-------------|-----------|-----------------|
| 200073_s_at | 15 | HNRPD       | M94630    | 4q21.1-q21.2    |
| 209330_s_at | 15 | HNRPD       | D55674    | 4q21.1-q21.2    |
| 213359_at   | 15 | HNRPD       | W74620    | 4q21.1-q21.2    |
| 221480_at   | 13 | HNRPD       | D55672    | 4q21.1-q21.2    |
| 221481_x_at | 15 | HNRPD       | D55672    | 4q21.1-q21.2    |
| 201993_x_at | 15 | HNRPDL      | NM_005463 | 4q13-q21        |
| 209067_s_at | 15 | HNRPDL      | D89092    | 4q13-q21        |
| 209068_at   | 13 | HNRPDL      | D89678    | 4q13-q21        |
| 212454_x_at | 15 | HNRPDL      | AI762552  | 4q13-q21        |
| 201376_s_at | 12 | HNRPF       | NM_004966 | 10q11.21-q11.22 |
| 201031_s_at | 15 | HNRPH1      | NM_005520 | 5q35.3          |
| 213619_at   | 15 | HNRPH1      | AV753392  | 5q35.3          |
| 201132_at   | 15 | HNRPH2      | NM_019597 | Xq22            |
| 207127_s_at | 15 | HNRPH3      | NM_021644 | 10q22           |
| 208990_s_at | 15 | HNRPH3      | AI912352  | 10q22           |
| 210110_x_at | 15 | HNRPH3      | AF132363  | 10q22           |
| 210588_x_at | 15 | HNRPH3      | L32610    | 10q22           |
| 200097_s_at | 15 | HNRPK       | AI701949  | 9q21.32-q21.33  |
| 200775_s_at | 15 | HNRPK       | BC000355  | 9q21.32-q21.33  |
| 221860_at   | 15 | HNRPL       | AL044078  | 19q13.2         |
| 35201_at    | 15 | HNRPL       | X16135    | 19q13.2         |
| 208765_s_at | 15 | HNRPR       | NM_005826 | 1p36.11         |
| 208766_s_at | 15 | HNRPR       | BC001449  | 1p36.11         |
| 200593_s_at | 15 | HNRPU       | BC003621  | 1q44            |
| 200594_x_at | 15 | HNRPU       | NM_004501 | 1q44            |
| 208713_at   | 15 | HNRPUL1     | BF724216  | 19q13.31        |
| 209675_s_at | 10 | HNRPUL1     | BC004242  | 19q13.31        |
| 209252_at   | 14 | HO3         | U18937    | 5q31.3          |
| 201972_at   | 15 | HO68        | AF113129  | 3q13.31         |
| 213793_s_at | 15 | HOMER1      | BE550452  | 5q14.2          |
| 204647_at   | 15 | HOMER3      | NM_004838 | 19p13.11        |
| 215489_x_at | 15 | HOMER3      | AI871287  | 19p13.11        |
| 209721_s_at | 15 | HOM-TES-103 | BC002857  | 12p13.3         |
| 36030_at    | 15 | HOM-TES-103 | AL080214  | 12p13.3         |
| 211597_s_at | 15 | HOP         | AB059408  | 4q11-q12        |
| 216071_x_at | 15 | HOPA        | AF132033  | Xq13            |
| 206848_at   | 13 | HOXA7       | NM_006896 | 7p15-p14        |
| 206194_at   | 10 | HOXC4       | AW299598  | 12q13.3         |
| 210762_s_at | 15 | HP          | AF026219  | 8p22            |
| 209715_at   | 15 | HP1         | L07515    | 12q13.13        |
| 209039_x_at | 14 | HPAST       | AF001434  | 11q13           |
| 205462_s_at | 10 | HPCAL1      | NM_002149 | 2p25.1          |
| 212552_at   | 14 | HPCAL1      | BE617588  | 2p25.1          |
| 221645_s_at | 15 | HPF1        | M27877    | 19q13.3         |
| 203914_x_at | 10 | HPGD        | NM_000860 | 4q34-q35        |
| 217485_x_at | 15 | hPMS3       | D38435    | 7q22.1          |
| 216525_x_at | 15 | hPMS5       | D38437    | 7q11.23         |
| 216843_x_at | 10 | hPMSR2      | U38964    | ---             |
| 216111_x_at | 14 | hPMSR3      | U38979    | ---             |
| 179_at      | 10 | hPMSR6      | U38980    | ---             |

|             |    |                 |           |               |
|-------------|----|-----------------|-----------|---------------|
| 210707_x_at | 13 | hPMSR6          | U38980    | 7             |
| 202854_at   | 15 | HPRT1           | NM_000194 | Xq26.1        |
| 203309_s_at | 11 | HPS1            | NM_000195 | 10q23.1-q23.3 |
| 204544_at   | 15 | HPS5            | NM_007216 | 11p14         |
| 212983_at   | 15 | HRAS            | NM_005343 | 11p15.5       |
| 219983_at   | 15 | HRASLS          | NM_020386 | 3q29          |
| 219984_s_at | 15 | HRASLS          | NM_020386 | 3q29          |
| 209581_at   | 14 | HRASLS3         | BC001387  | 11q13.1       |
| 218091_at   | 15 | HRB             | NM_004504 | 2q36.3        |
| 218092_s_at | 15 | HRB             | NM_004504 | 2q36.3        |
| 203202_at   | 15 | HRB2            | AI950314  | 12q21.1       |
| 207066_at   | 15 | HRC             | NM_002152 | 19q13.3       |
| 37170_at    | 10 | HRIHFB2017      | AB015331  | 4q21.23       |
| 216210_x_at | 15 | HRIHFB2122      | AA046650  | 22q13.1       |
| 206864_s_at | 12 | HRK             | NM_003806 | 12q24.23      |
| 202098_s_at | 15 | HRMT1L1         | NM_001535 | 21q22.3       |
| 221564_at   | 15 | HRMT1L1         | AL570294  | 21q22.3       |
| 206445_s_at | 15 | HRMT1L2         | NM_001536 | 19q13.3       |
| 207563_s_at | 15 | HRNT1           | U77413    | Xq13          |
| 209240_at   | 15 | HRNT1           | AF070560  | Xq13          |
| 209526_s_at | 15 | HRP-3           | AB029156  | 15q11.2       |
| 210428_s_at | 15 | HRS             | AF260566  | 17q25         |
| 203790_s_at | 15 | HRSP12          | N54448    | 8q22          |
| 216976_s_at | 15 | H-RYK           | X96588    | 3q22          |
| 219020_at   | 15 | HS1BP3          | NM_022460 | 2p24.2        |
| 203284_s_at | 15 | HS2ST1          | AW151887  | 1p31.1-p22.1  |
| 203285_s_at | 15 | HS2ST1          | NM_012262 | 1p31.1-p22.1  |
| 205466_s_at | 11 | HS3ST1          | BF000296  | 4p16          |
| 218896_s_at | 15 | HSA277841       | NM_018553 | 17p13.3       |
| 204405_x_at | 15 | HSA9761         | NM_014473 | 5q11-q14      |
| 217106_x_at | 15 | HSA9761         | AF091078  | 5q11-q14      |
| 200942_s_at | 15 | HSBP1           | NM_001537 | 16q23.3       |
| 212817_at   | 15 | Hsc40; KIAA1045 | AK023253  | 9p13.2        |
| 210338_s_at | 15 | HSC54           | AB034951  | 11q24.1       |
| 208687_x_at | 15 | HSC70           | AF352832  | 11q24.1       |
| 219304_s_at | 15 | hSCDGF-B        | AB033832  | 11q22.3       |
| 205404_at   | 11 | HSD11B1         | NM_005525 | 1q32-q41      |
| 217869_at   | 15 | HSD17B12        | NM_016142 | 11p11.2       |
| 201413_at   | 15 | HSD17B4         | NM_000414 | 5q21          |
| 220081_x_at | 14 | HSD17B7         | NM_016371 | 1q23          |
| 213540_at   | 15 | HSD17B8         | AL031228  | 6p21.3        |
| 209512_at   | 15 | HSDL2           | BC004331  | 9q33.1        |
| 209513_s_at | 15 | HSDL2           | BC004331  | 9q33.1        |
| 202344_at   | 15 | HSF1            | NM_005526 | 8q24.3        |
| 211220_s_at | 10 | HSF2            | BC005329  | 6q22.32       |
| 216205_s_at | 15 | HSG             | AK021947  | 1p36.21       |
| 203013_at   | 15 | HSGT1           | NM_007265 | 10q22.3       |
| 209339_at   | 15 | hSiah2          | U76248    | 3q25          |
| 208810_at   | 15 | HSJ2            | AF080569  | 7q36.3        |
| 208811_s_at | 15 | HSJ2            | AF080569  | 7q36.3        |

|             |    |                   |           |               |
|-------------|----|-------------------|-----------|---------------|
| 211251_x_at | 15 | HSM               | U78774    | 1p32          |
| 211797_s_at | 13 | HSM               | U62296    | 1p32          |
| 221771_s_at | 14 | HSMPP8            | BC003542  | 13q12.11      |
| 208739_x_at | 15 | HSMT3             | L76416    | 17q25         |
| 208738_x_at | 15 | HSMT3             | AK024823  | 17q25         |
| 209481_at   | 15 | HSNFRK            | AF226044  | 3p21.32       |
| 200064_at   | 15 | HSP90BETA         | AF275719  | 6p12          |
| 219212_at   | 14 | HSPA14            | NM_016299 | 10p14         |
| 200799_at   | 15 | HSPA1A            | NM_005345 | 6p21.3        |
| 200800_s_at | 15 | HSPA1A            | NM_005345 | 6p21.3        |
| 202581_at   | 15 | HSPA1B            | NM_005346 | 6p21.3        |
| 211538_s_at | 15 | HSPA2             | U56725    | ---           |
| 211015_s_at | 15 | HSPA4             | L12723    | 5q31.1-q31.2  |
| 213564_x_at | 15 | HSPA8             | BE042354  | 12p12.2-p12.1 |
| 221891_x_at | 15 | HSPA8             | AA704004  | 11q24.1       |
| 200690_at   | 14 | HSPA9B            | AA927701  | 5q31.1        |
| 200691_s_at | 15 | HSPA9B            | NM_004134 | 5q31.1        |
| 200692_s_at | 15 | HSPA9B            | NM_004134 | 5q31.1        |
| 201841_s_at | 15 | HSPB1             | NM_001540 | 7q11.23       |
| 205824_at   | 15 | HSPB2             | NM_001541 | 11q22-q23     |
| 206375_s_at | 15 | HSPB3             | NM_006308 | 5q11.2        |
| 214767_s_at | 12 | HSPB6             | AL551046  | 19q13.13      |
| 218934_s_at | 15 | HSPB7             | NM_014424 | 1p36.23-p34.3 |
| 219284_at   | 11 | HSPBAP1           | NM_024610 | 3q21.1        |
| 202415_s_at | 15 | HSPBP1            | NM_012267 | 19q13.42      |
| 218026_at   | 15 | HSPC009           | NM_014019 | 17q21         |
| 221791_s_at | 15 | HSPC016           | BG167522  | 3p21.31       |
| 217926_at   | 15 | HSPC023           | NM_014047 | 19p13.13      |
| 211406_at   | 15 | HSPC039; PRO2309  | AF119875  | 18q12         |
| 218971_s_at | 11 | HSPC049           | AK001606  | 7q33          |
| 203023_at   | 15 | HSPC111           | NM_016391 | 5q35.3        |
| 214011_s_at | 15 | HSPC111           | BE314601  | 5q35.3        |
| 210829_s_at | 15 | HSPC116           | AF077048  | 5q14.1        |
| 200042_at   | 15 | HSPC117           | NM_014306 | 22q12         |
| 218936_s_at | 15 | HSPC128           | NM_014167 | 12q21.31      |
| 221046_s_at | 15 | HSPC135           | NM_014170 | 3q13.2        |
| 219979_s_at | 15 | HSPC138           | NM_016401 | 11q14.1       |
| 221711_s_at | 15 | HSPC142           | BC006244  | 19p13.12      |
| 217774_s_at | 15 | HSPC152           | NM_016404 | 11q13.1       |
| 218728_s_at | 15 | HSPC163           | AK024569  | 1q42.12       |
| 221597_s_at | 15 | HSPC171           | BC003080  | 16q22.1       |
| 218354_at   | 15 | HSPC176           | NM_016209 | 16q24.3       |
| 209020_at   | 15 | HSPC207           | AF217514  | 20q13.11      |
| 213031_s_at | 15 | HSPC264; FLJ14888 | AF161382  | 15q25.2       |
| 211968_s_at | 15 | HSPCA             | AI962933  | 14q32.33      |
| 211969_at   | 15 | HSPCA             | BG420237  | 14q32.33      |
| 214359_s_at | 15 | HSPCB             | AI218219  | 6p12          |
| 200806_s_at | 15 | HSPD1             | BE256479  | ---           |
| 200807_s_at | 15 | HSPD1             | NM_002156 | 2q33.1        |
| 205133_s_at | 15 | HSPE1             | NM_002157 | 2q33.1        |

|             |    |                  |           |                   |
|-------------|----|------------------|-----------|-------------------|
| 201655_s_at | 15 | HSPG2            | AI991033  | 1p36.1-p35        |
| 206976_s_at | 15 | HSPH1            | NM_006644 | 13q12.3           |
| 208744_x_at | 15 | HSPH1            | D86956    | 13q12.3           |
| 211089_s_at | 12 | HSPK36           | Z25434    | 13q14.13          |
| 210211_s_at | 15 | HSPN             | AF028832  | 14q32.33          |
| 204521_at   | 15 | HSU79274         | NM_013300 | 12q24.13          |
| 221622_s_at | 15 | HT007; MGC111203 | AF246240  | 11q14.1           |
| 220703_at   | 15 | HT009            | NM_018470 | 10p15.3           |
| 206689_x_at | 13 | HTATIP           | NM_006388 | 11q13             |
| 214258_x_at | 11 | HTATIP           | AA886971  | 11q13             |
| 209448_at   | 11 | HTATIP2          | BC002439  | 11p15.1           |
| 202602_s_at | 15 | HTATSF1          | NM_014500 | Xq26.1-q27.2      |
| 209586_s_at | 15 | HTCD37; DRES-17  | AF123539  | 1q21              |
| 210988_s_at | 15 | HTCD37; DRES-17  | AF123538  | 1q21              |
| 200072_s_at | 15 | HTGR1            | AF061832  | 19p13.3-p13.2     |
| 215000_s_at | 15 | HUM3CL           | AL117593  | 2p21 /// 2p21     |
| 213951_s_at | 13 | HUMGT198A        | BE964655  | ---               |
| 204883_s_at | 10 | HUS1             | NM_004507 | 7p13-p12          |
| 207783_x_at | 15 | HUWE1            | NM_017627 | 13q12-q14         |
| 208598_s_at | 15 | HUWE1            | NM_005703 | ---               |
| 210849_s_at | 15 | HVPS41           | AF135593  | 7p14-p13          |
| 206855_s_at | 15 | HYAL2            | NM_003773 | 3p21.3            |
| 221435_x_at | 15 | HYI              | NM_031207 | 1p34.1 /// 1p34.1 |
| 200825_s_at | 15 | HYOU1            | NM_006389 | 11q23.1-q23.3     |
| 212493_s_at | 15 | HYPB             | AI761110  | 3p21.31           |
| 215038_s_at | 15 | HYPB             | AF049103  | 3p21.31           |
| 219910_at   | 14 | HYPE             | NM_007076 | 12q24.1           |
| 218680_x_at | 15 | HYPK             | NM_016400 | 15q15.1           |
| 211009_s_at | 15 | HZF7; ZNFEB      | AF159567  | 18q12             |
| 211075_s_at | 15 | IAP              | Z25521    | 3q13.1-q13.2      |
| 204744_s_at | 15 | IARS             | NM_013417 | 9q21              |
| 217900_at   | 15 | IARS2            | NM_018060 | 1q42.11           |
| 36564_at    | 14 | IBRDC3           | W27419    | 1p34.3            |
| 211684_s_at | 15 | IC2              | AF250307  | 2q31.1            |
| 38918_at    | 14 | ICA12            | AF083105  | 1q32              |
| 210547_x_at | 14 | ICA69; ICAp69    | L21181    | 7p22              |
| 202638_s_at | 12 | ICAM1            | NM_000201 | 19p13.3-p13.2     |
| 204683_at   | 15 | ICAM2            | NM_000873 | 17q23-q25         |
| 213620_s_at | 15 | ICAM2            | AA126728  | 17q23-q25         |
| 204949_at   | 14 | ICAM3            | NM_002162 | 19p13.3-p13.2     |
| 210785_s_at | 13 | ICB-1            | AB035482  | 1p35.3            |
| 212959_s_at | 15 | ICD              | AK001821  | 12q23.3           |
| 209668_x_at | 15 | iCE; CE-2        | D50579    | 16q22.1           |
| 219122_s_at | 15 | ICF45            | NM_017872 | 5q33.3            |
| 201609_x_at | 15 | ICMT             | AL578502  | 1p36.21           |
| 201611_s_at | 15 | ICMT             | AL578502  | 1p36.21           |
| 204868_at   | 15 | ICT1             | NM_001545 | 17q25.2           |
| 208937_s_at | 15 | ID1              | D13889    | 20q11             |
| 201565_s_at | 15 | ID2              | NM_002166 | 2p25              |
| 201566_x_at | 15 | ID2              | NM_002166 | 2p25              |

|             |    |        |           |                 |
|-------------|----|--------|-----------|-----------------|
| 213931_at   | 15 | ID2    | AI819238  | ---             |
| 207826_s_at | 15 | ID3    | NM_002167 | 1p36.13-p36.12  |
| 209291_at   | 15 | ID4    | AW157094  | 6p22-p21        |
| 209292_at   | 14 | ID4    | AL022726  | 6p22-p21        |
| 209293_x_at | 15 | ID4    | U16153    | 6p22-p21        |
| 203327_at   | 15 | IDE    | N22903    | 10q23-q25       |
| 203328_x_at | 12 | IDE    | NM_004969 | 10q23-q25       |
| 201193_at   | 15 | IDH1   | NM_005896 | 2q33.3          |
| 210045_at   | 11 | IDH2   | AU151428  | 15q26.1         |
| 210046_s_at | 15 | IDH2   | U52144    | 15q26.1         |
| 202069_s_at | 15 | IDH3A  | NM_005530 | 15q25.1-q25.2   |
| 202070_s_at | 15 | IDH3A  | NM_005530 | 15q25.1-q25.2   |
| 201509_at   | 15 | IDH3B  | NM_006899 | 20p13           |
| 210014_x_at | 15 | IDH3B  | AF023266  | 20p13           |
| 210418_s_at | 15 | IDH3B  | AF023265  | 20p13 /// 20p13 |
| 202471_s_at | 15 | IDH3G  | NM_004135 | Xq28            |
| 204615_x_at | 15 | IDI1   | NM_004508 | 10p15.3         |
| 208881_x_at | 15 | IDI1   | BC005247  | 10p15.3         |
| 212483_at   | 15 | IDN3   | AB019494  | 5p13.2          |
| 202439_s_at | 15 | IDS    | NM_000202 | Xq28            |
| 206342_x_at | 14 | IDS    | NM_006123 | Xq28            |
| 212221_x_at | 15 | IDS    | AV703259  | Xq28            |
| 212223_at   | 15 | IDS    | AV703259  | Xq28            |
| 217432_s_at | 13 | IDS    | AF179281  | Xq28            |
| 202081_at   | 15 | IER2   | NM_004907 | 19p13.13        |
| 201631_s_at | 15 | IER3   | NM_003897 | 6p21.3          |
| 218611_at   | 15 | IER5   | NM_016545 | 1q25.1          |
| 203854_at   | 15 | IF     | NM_000204 | 4q25            |
| 201025_at   | 15 | IF2    | AB018284  | 2p11.1-q11.1    |
| 206332_s_at | 15 | IFI16  | NM_005531 | 1q22            |
| 208965_s_at | 15 | IFI16  | BG256677  | 1q22            |
| 208966_x_at | 15 | IFI16b | AF208043  | 1q22            |
| 202411_at   | 15 | IFI27  | NM_005532 | 14q32           |
| 201422_at   | 15 | IFI30  | NM_006332 | 19p13.1         |
| 209417_s_at | 13 | IFI35  | BC001356  | 17q21           |
| 214453_s_at | 14 | IFI44  | NM_006417 | 1p31.1          |
| 203153_at   | 15 | IFIT1  | NM_001548 | 10q25-q26       |
| 204747_at   | 13 | IFIT3  | NM_001549 | 10q24           |
| 201601_x_at | 15 | IFITM1 | NM_003641 | 11p15.5         |
| 214022_s_at | 15 | IFITM1 | AA749101  | 11p15.5         |
| 201315_x_at | 15 | IFITM2 | NM_006435 | 11p15.5         |
| 212203_x_at | 15 | IFITM3 | BF338947  | 11p15.5         |
| 216565_x_at | 15 | IFITM3 | AL121994  | ---             |
| 208448_x_at | 13 | IFNA16 | NM_002173 | 9p22            |
| 204786_s_at | 10 | IFNAR2 | L41944    | 21q22.1         |
| 202727_s_at | 15 | IFNGR1 | NM_000416 | 6q23-q24        |
| 201642_at   | 15 | IFNGR2 | NM_005534 | 21q22.11        |
| 202146_at   | 15 | IFRD1  | AA747426  | 7q22-q31        |
| 209100_at   | 15 | IFRD2  | BC001327  | 3p21.3          |
| 210312_s_at | 15 | IFT20  | BC002640  | 17q11.2         |



|             |    |           |           |               |
|-------------|----|-----------|-----------|---------------|
| 218709_s_at | 15 | IFT52     | NM_016004 | ---           |
| 218100_s_at | 15 | IFT57     | NM_018010 | 3q13.13       |
| 219174_at   | 13 | IFT74     | NM_025103 | 9p21.1        |
| 219372_at   | 15 | IFT81     | NM_014055 | 12q24.13      |
| 204703_at   | 15 | IFT88     | NM_006531 | 13q12.1       |
| 202105_at   | 15 | IGBP1     | NM_001551 | Xq13.1-q13.3  |
| 209540_at   | 11 | IGF1      | M29644    | 12q22-q23     |
| 209541_at   | 15 | IGF1      | AI972496  | 12q22-q23     |
| 203627_at   | 15 | IGF1R     | AI830698  | 15q25-q26     |
| 203628_at   | 14 | IGF1R     | H05812    | 15q25-q26     |
| 202410_x_at | 14 | IGF2      | NM_000612 | 11p15.5       |
| 210881_s_at | 10 | IGF2      | M17863    | 11p15.5       |
| 201392_s_at | 15 | IGF2R     | BG031974  | 6q26          |
| 201393_s_at | 15 | IGF2R     | NM_000876 | 6q26          |
| 210095_s_at | 15 | IGFBP1    | M31159    | 7p13-p12      |
| 202718_at   | 15 | IGFBP2    | NM_000597 | 2q33-q34      |
| 212143_s_at | 15 | IGFBP3    | BF340228  | 7p13-p12      |
| 201508_at   | 15 | IGFBP4    | NM_001552 | 17q12-q21.1   |
| 203425_s_at | 15 | IGFBP5    | M65062    | 2q33-q36      |
| 211958_at   | 15 | IGFBP5    | R73554    | 2q33-q36      |
| 211959_at   | 15 | IGFBP5    | AW007532  | 2q33-q36      |
| 203851_at   | 15 | IGFBP6    | NM_002178 | 12q13         |
| 201162_at   | 15 | IGFBP7    | NM_001553 | 4q12          |
| 201163_s_at | 15 | IGFBP7    | NM_001553 | 4q12          |
| 213910_at   | 12 | IGFBP7    | AW770896  | 4q12          |
| 202421_at   | 15 | IGSF3     | AB007935  | 1p13          |
| 209030_s_at | 15 | IGSF4     | NM_014333 | 11q23.2       |
| 209031_at   | 15 | IGSF4     | AL519710  | 11q23.2       |
| 209818_s_at | 14 | IHABP4    | AF241831  | 9q22.3-q31    |
| 212439_at   | 13 | IHPK1     | BE614199  | 3p21.31       |
| 218192_at   | 15 | IHPK2     | NM_016291 | 3p21.31       |
| 202491_s_at | 15 | IKBKAP    | NM_003640 | 9q31          |
| 209341_s_at | 13 | IKBKB     | AU153366  | 8p11.2        |
| 209666_s_at | 12 | IKK-alpha | AF080157  | 10q24-q25     |
| 209575_at   | 15 | IL10RB    | BC001903  | 21q22.1-q22.2 |
| 204773_at   | 15 | IL11RA    | NM_004512 | 9p13          |
| 201887_at   | 15 | IL13RA1   | NM_001560 | Xq24          |
| 211612_s_at | 14 | IL13RA1   | U62858    | ---           |
| 205992_s_at | 15 | IL15      | NM_000585 | 4q31          |
| 64440_at    | 12 | IL17RC    | AI560217  | 3p25.3        |
| 209970_x_at | 15 | IL1BCE    | M87507    | 11q23         |
| 211366_x_at | 15 | IL1BCE    | U13698    | 11q23         |
| 202948_at   | 15 | IL1R1     | NM_000877 | 2q12          |
| 220663_at   | 13 | IL1RAPL1  | NM_014271 | Xp22.1-p21.3  |
| 216483_s_at | 15 | IL25      | AC005339  | ---           |
| 203828_s_at | 14 | IL32      | NM_004221 | 16p13.3       |
| 205207_at   | 13 | IL6       | NM_000600 | 7p21          |
| 212195_at   | 15 | IL6ST     | AL049265  | 5q11          |
| 212196_at   | 15 | IL6ST     | AW242916  | 5q11          |
| 202859_x_at | 13 | IL8       | NM_000584 | 4q13-q21      |

|             |    |        |           |                |
|-------------|----|--------|-----------|----------------|
| 200052_s_at | 15 | ILF2   | NM_004515 | 1q22           |
| 208930_s_at | 12 | ILF3   | BG032366  | 19p13.2        |
| 217804_s_at | 15 | ILF3   | NM_004516 | 19p13.2        |
| 217805_at   | 15 | ILF3   | NM_004516 | 19p13.2        |
| 201234_at   | 15 | ILK    | NM_004517 | 11p15.5-p15.4  |
| 202993_at   | 15 | ILVBL  | NM_006844 | 19p13.1        |
| 210624_s_at | 15 | ILVBL  | BC000109  | 19p13.1        |
| 211952_at   | 14 | IMB3   | AF339834  | 13q32.2        |
| 200955_at   | 15 | IMMT   | NM_006839 | 2p11.2         |
| 218847_at   | 15 | IMP-2  | NM_006548 | 3q28           |
| 203819_s_at | 15 | IMP-3  | AU160004  | 7p11           |
| 203820_s_at | 15 | IMP-3  | NM_006547 | 7p11           |
| 212411_at   | 13 | IMP4   | BE747342  | 2q21.2         |
| 203011_at   | 15 | IMPA1  | NM_005536 | 8q21.13-q21.3  |
| 203126_at   | 14 | IMPA2  | NM_014214 | 18p11.2        |
| 218637_at   | 11 | IMPACT | NM_018439 | 18q11.2-q12.1  |
| 201892_s_at | 15 | IMPDH2 | NM_000884 | 3p21.2         |
| 208415_x_at | 12 | ING1   | NM_005537 | 13q34          |
| 209808_x_at | 14 | ING1   | AW193656  | 13q34          |
| 205981_s_at | 15 | ING2   | NM_001564 | 4q35.1         |
| 205070_at   | 15 | ING3   | NM_019071 | 7q31           |
| 48825_at    | 14 | ING4   | AA887083  | 12p13.31       |
| 207687_at   | 11 | INHBC  | NM_005538 | 12q13.1        |
| 207688_s_at | 15 | INHBC  | NM_005538 | 12q13.1        |
| 202794_at   | 15 | INPP1  | NM_002194 | 2q32           |
| 204552_at   | 13 | INPP4A | AA355179  | 2q11.2         |
| 205376_at   | 15 | INPP4B | NM_003866 | 4q31.1         |
| 203006_at   | 15 | INPP5A | NM_005539 | 10q26.3        |
| 204706_at   | 13 | INPP5E | NM_019892 | 9q34.3         |
| 203607_at   | 15 | INPP5F | NM_014937 | 10q26.13       |
| 210612_s_at | 11 | INPP5H | AF318616  | 6q25.3         |
| 201598_s_at | 13 | INPPL1 | NM_001567 | 11q23          |
| 201625_s_at | 11 | INSIG1 | BE300521  | 7q36           |
| 201626_at   | 15 | INSIG1 | BG292233  | 7q36           |
| 201627_s_at | 15 | INSIG1 | BE300521  | 7q36           |
| 213792_s_at | 15 | INSR   | AA485908  | 19p13.3-p13.2  |
| 210114_at   | 10 | INVS   | AF039217  | 9q31           |
| 203546_at   | 15 | IPO13  | NM_014652 | 1p34.1         |
| 218305_at   | 10 | IPO4   | NM_024658 | 14q11.2        |
| 200992_at   | 15 | IPO7   | AL137335  | 11p15.3        |
| 200993_at   | 15 | IPO7   | AA939270  | 11p15.3        |
| 200994_at   | 15 | IPO7   | BG291787  | 11p15.3        |
| 200995_at   | 15 | IPO7   | AI741392  | 11p15.3        |
| 217885_at   | 15 | IPO9   | NM_018085 | 1q32.1         |
| 216841_s_at | 15 | IPO-B  | X15132    | 6q25.3         |
| 219092_s_at | 13 | IPPK   | NM_022755 | 9q21.33-q22.31 |
| 211707_s_at | 12 | IQCB1  | BC005806  | 3q21.1         |
| 204202_at   | 11 | IQCE   | NM_017604 | 7p22.3         |
| 214739_at   | 13 | IQCG   | AI357539  | 3q29           |
| 221185_s_at | 12 | IQCG   | NM_025111 | 3q29           |

|             |    |          |           |                 |
|-------------|----|----------|-----------|-----------------|
| 200791_s_at | 15 | IQGAP1   | NM_003870 | 15q26.1         |
| 210840_s_at | 15 | IQGAP1   | D29640    | 15q26.1         |
| 213446_s_at | 11 | IQGAP1   | AI679073  | 15q26.1         |
| 203474_at   | 12 | IQGAP2   | NM_006633 | 5q13.3-q14.1    |
| 203906_at   | 13 | IQSEC1   | AI652645  | 3p25.2          |
| 203907_s_at | 14 | IQSEC1   | AI652645  | 3p25.2          |
| 213129_s_at | 15 | IQWD1    | AI970157  | ---             |
| 217908_s_at | 15 | IQWD1    | NM_018442 | 1q23.3          |
| 201587_s_at | 15 | IRAK1    | NM_001569 | Xq28            |
| 202531_at   | 11 | IRF1     | NM_002198 | 5q31.1          |
| 203275_at   | 15 | IRF2     | NM_002199 | 4q34.1-q35.1    |
| 202621_at   | 15 | IRF3     | NM_001571 | 19q13.3-q13.4   |
| 204562_at   | 11 | IRF4     | NM_002460 | 6p25-p23        |
| 202597_at   | 13 | IRF6     | AU144284  | 1q32.3-q41      |
| 208436_s_at | 15 | IRF7     | NM_004030 | 11p15.5         |
| 204057_at   | 11 | IRF8     | AI073984  | 16q24.1         |
| 204686_at   | 15 | IRS1     | NM_005544 | 2q36            |
| 209184_s_at | 14 | IRS2     | AF073310  | 13q34           |
| 209185_s_at | 15 | IRS2     | AF073310  | 13q34           |
| 210239_at   | 14 | IRX-2a   | U90304    | 16q11.2-q13     |
| 220225_at   | 15 | IRX4     | NM_016358 | 5p15.3          |
| 209075_s_at | 15 | ISCU     | AY009128  | 12q24.1         |
| 208114_s_at | 15 | ISG20L2  | NM_030980 | 1q23.1          |
| 203882_at   | 15 | ISGF3G   | NM_006084 | 14q11.2         |
| 207191_s_at | 15 | ISLR     | NM_005545 | 15q23-q24       |
| 218170_at   | 15 | ISOC1    | NM_016048 | 5q22.1-q33.3    |
| 222240_s_at | 15 | ISYNA1   | AL137749  | 19p13.11        |
| 209744_x_at | 14 | Itch     | AB056663  | 20q11.22-q11.23 |
| 206766_at   | 15 | ITGA10   | AF112345  | 1q21            |
| 206493_at   | 14 | ITGA2B   | NM_000419 | 17q21.32        |
| 201389_at   | 15 | ITGA5    | NM_002205 | 12q11-q13       |
| 201656_at   | 15 | ITGA6    | NM_000210 | 2q31.1          |
| 215177_s_at | 11 | ITGA6    | AV733308  | 2q31.1          |
| 209663_s_at | 15 | ITGA7    | AF072132  | 12q13           |
| 216331_at   | 15 | ITGA7    | AK022548  | 12q13           |
| 205055_at   | 15 | ITGAE    | NM_002208 | 17p13           |
| 202351_at   | 15 | ITGAV    | AI093579  | 2q31-q32        |
| 211945_s_at | 15 | ITGB1    | BG500301  | 10p11.2         |
| 216178_x_at | 15 | ITGB1    | AA215854  | 10p11.2         |
| 203336_s_at | 15 | ITGB1BP1 | AL548363  | 2p25.2          |
| 203337_x_at | 12 | ITGB1BP1 | NM_004763 | 2p25.2          |
| 219829_at   | 15 | ITGB1BP2 | NM_012278 | Xq12-q13.1      |
| 221051_s_at | 15 | ITGB1BP3 | NM_014446 | 19p13.3         |
| 202803_s_at | 13 | ITGB2    | NM_000211 | 21q22.3         |
| 204628_s_at | 15 | ITGB3    | NM_000212 | 17q21.32        |
| 216261_at   | 10 | ITGB3    | AI151479  | 17q21.32        |
| 205176_s_at | 15 | ITGB3BP  | NM_014288 | 1p31.3          |
| 201124_at   | 15 | ITGB5    | AL048423  | 3q21.2          |
| 201125_s_at | 15 | ITGB5    | NM_002213 | 3q21.2          |
| 214020_x_at | 11 | ITGB5    | AI335208  | 3q21.2          |

|             |    |          |           |                 |
|-------------|----|----------|-----------|-----------------|
| 202746_at   | 15 | ITM2A    | AL021786  | Xq13.3-Xq21.2   |
| 202747_s_at | 15 | ITM2A    | NM_004867 | Xq13.3-Xq21.2   |
| 217731_s_at | 15 | ITM2B    | NM_021999 | 13q14.3         |
| 217732_s_at | 15 | ITM2B    | NM_021999 | 13q14.3         |
| 221004_s_at | 15 | ITM2C    | NM_030926 | 2q37 /// 2q37   |
| 209171_at   | 13 | ITPA     | AF219116  | 20p             |
| 203723_at   | 14 | ITPKB    | NM_002221 | 1q42.13         |
| 213076_at   | 15 | ITPKC    | D38169    | 19q13.1         |
| 203710_at   | 15 | ITPR1    | NM_002222 | 3p26-p25        |
| 216944_s_at | 11 | ITPR1    | U23850    | 3p26-p25        |
| 210740_s_at | 15 | ITRPK1   | AF279372  | 14q31           |
| 209297_at   | 11 | ITSN     | AF114488  | 21q22.1-q22.2   |
| 209298_s_at | 13 | ITSN     | AF114488  | 21q22.1-q22.2   |
| 35776_at    | 15 | ITSN     | AF064243  | 21q22.1-q22.2   |
| 209907_s_at | 15 | ITSN2    | AF182198  | 2pter-p25.1     |
| 203682_s_at | 12 | IVD      | NM_002225 | 15q14-q15       |
| 216958_s_at | 10 | IVD      | AK022777  | 15q14-q15       |
| 201363_s_at | 15 | IVNS1ABP | AB020657  | 1q25.1-q31.1    |
| 206245_s_at | 15 | IVNS1ABP | NM_006469 | 1q25.1-q31.1    |
| 209784_s_at | 15 | JAG2     | AF029778  | 14q32           |
| 32137_at    | 15 | jag2     | Y14330    | 14q32 /// 14q32 |
| 201648_at   | 15 | JAK1     | AL039831  | 1p31.3          |
| 205841_at   | 14 | JAK2     | NM_004972 | 9p24            |
| 205842_s_at | 14 | JAK2     | AF001362  | 9p24            |
| 219213_at   | 15 | JAM2     | NM_021219 | 21q21.2         |
| 212813_at   | 15 | JAM3     | AA149644  | 11q25           |
| 202040_s_at | 15 | JARID1A  | NM_005056 | 12p11           |
| 215698_at   | 13 | JARID1A  | AF007135  | 12p11           |
| 201548_s_at | 15 | JARID1B  | W02593    | 1q32.1          |
| 201549_x_at | 15 | JARID1B  | NM_006618 | 1q32.1          |
| 203297_s_at | 15 | JARID2   | BG029530  | 6p24-p23        |
| 216309_x_at | 10 | JH8      | AF072467  | 8q24.3          |
| 37872_at    | 12 | JH8      | AF072468  | 8q24.3          |
| 213971_s_at | 14 | JJAZ1    | AI924660  | ---             |
| 212689_s_at | 15 | JMJD1A   | AA524505  | 2p11.2          |
| 201643_x_at | 15 | JMJD1B   | NM_016604 | 5q31            |
| 210878_s_at | 15 | JMJD1B   | BC001202  | 5q31            |
| 221763_at   | 15 | JMJD1C   | AI694023  | 10q22.1         |
| 203205_at   | 13 | JMJD2A   | NM_014663 | 1p34.1          |
| 212492_s_at | 15 | JMJD2B   | AW237172  | 19p13.3         |
| 212495_at   | 10 | JMJD2B   | AW237172  | 19p13.3         |
| 212496_s_at | 11 | JMJD2B   | AW237172  | 19p13.3         |
| 213146_at   | 10 | JMJD3    | AA521267  | 17p13.1         |
| 204813_at   | 14 | JNK3A2   | U34819    | 4q22.1-q23      |
| 201751_at   | 15 | JOSD1    | NM_014876 | 22q13.1         |
| 218750_at   | 15 | JOSD3    | NM_024116 | 11q21           |
| 221580_s_at | 15 | JOSD3    | BC001972  | 11q21           |
| 206734_at   | 15 | JRKL     | NM_003772 | 11q21           |
| 200048_s_at | 15 | JTB      | NM_006694 | 1q21            |
| 210927_x_at | 15 | JTB      | BC004239  | 1q21            |

|             |    |                 |           |               |
|-------------|----|-----------------|-----------|---------------|
| 210754_s_at | 14 | JTK8            | M79321    | 8q13          |
| 202138_x_at | 15 | JTV1            | NM_006303 | 7p22          |
| 209971_x_at | 14 | JTV1            | AI928526  | 7p22          |
| 213281_at   | 15 | JUN             | BE327172  | 1p32-p31      |
| 201473_at   | 15 | JUNB            | NM_002229 | 19p13.2       |
| 203752_s_at | 15 | JUND            | NM_005354 | 19p13.2       |
| 201015_s_at | 15 | JUP             | NM_021991 | 17q21         |
| 213287_s_at | 15 | K10             | X14487    | 17q21         |
| 209008_x_at | 15 | K8              | U76549    | 12q13         |
| 207719_x_at | 15 | KAB             | NM_014812 | 1q44          |
| 212746_s_at | 15 | KAB             | AA126789  | 1q44          |
| 205206_at   | 15 | KAL1            | NM_000216 | Xp22.32       |
| 201090_x_at | 15 | K-ALPHA-1       | NM_006082 | 12q13.12      |
| 211058_x_at | 15 | K-ALPHA-1       | BC006379  | 12q13.12      |
| 211072_x_at | 15 | K-ALPHA-1       | BC006481  | 12q13.12      |
| 212639_x_at | 15 | K-ALPHA-1       | AL581768  | ---           |
| 213646_x_at | 15 | K-ALPHA-1       | BE300252  | 12q13.12      |
| 209714_s_at | 15 | KAP             | AF213033  | 14q22         |
| 200840_at   | 15 | KARS            | NM_005548 | 16q23-q24     |
| 200079_s_at | 15 | KARS2; KIAA0070 | AF285758  | 16q23-q24     |
| 209472_at   | 15 | KAT3            | BC000819  | 1p22.2        |
| 205526_s_at | 15 | KATNA1          | NM_007044 | 6q24.3        |
| 203162_s_at | 15 | KATNB1          | NM_005886 | 16q13         |
| 219106_s_at | 15 | KBTBD10         | AI126808  | 2q31.1        |
| 218570_at   | 14 | KBTBD4          | NM_018095 | 11p11.2       |
| 217938_s_at | 15 | KCMF1           | AI743396  | 2p11.2        |
| 207248_at   | 10 | KCNA4           | NM_002233 | 11p14         |
| 206762_at   | 14 | KCNA5           | NM_002234 | 12p13         |
| 210078_s_at | 11 | KCNAB1          | L39833    | 3q26.1        |
| 210471_s_at | 13 | KCNAB1          | U33428    | 3q26.1        |
| 208514_at   | 12 | KCNE1           | NM_000219 | 21q22.1-q22.2 |
| 205262_at   | 14 | KCNH2           | NM_000238 | 7q35-q36      |
| 206765_at   | 15 | KCNJ2           | AF153820  | 17q23.1-q24.2 |
| 208359_s_at | 14 | KCNJ4           | NM_004981 | 22q13.1       |
| 208404_x_at | 10 | KCNJ5           | NM_000890 | 11q24         |
| 205303_at   | 15 | KCNJ8           | BF514158  | 12p11.23      |
| 205304_s_at | 15 | KCNJ8           | BF514158  | 12p11.23      |
| 204679_at   | 14 | KCNK1           | NM_002245 | 1q42-q43      |
| 205952_at   | 11 | KCNK3           | NM_002246 | 2p23          |
| 219287_at   | 15 | KCNMB4          | AF160967  | 12q           |
| 220116_at   | 12 | KCNN2           | NM_021614 | 5q22.3        |
| 212188_at   | 15 | KCTD12          | AA551075  | 13q22.1       |
| 212192_at   | 15 | KCTD12          | AI718937  | 13q22.1       |
| 218553_s_at | 14 | KCTD15          | NM_024076 | 19q13.12      |
| 34858_at    | 15 | KCTD2           | D79998    | 17q25.2       |
| 217894_at   | 15 | KCTD3           | NM_016121 | 1q41          |
| 218474_s_at | 13 | KCTD5           | NM_018992 | 16p13.3       |
| 213474_at   | 15 | KCTD7           | AI890903  | 7q11.21       |
| 218823_s_at | 15 | KCTD9           | NM_017634 | 8p21.1        |
| 219479_at   | 14 | KDELC1          | NM_024089 | 13q33         |

|             |    |          |           |          |
|-------------|----|----------|-----------|----------|
| 200922_at   | 15 | KDELR1   | NM_006801 | 19q13.3  |
| 200698_at   | 15 | KDELR2   | AL542253  | 7p22.2   |
| 200699_at   | 15 | KDELR2   | AL542253  | 7p22.2   |
| 200700_s_at | 15 | KDELR2   | NM_006854 | 7p22.2   |
| 204017_at   | 15 | KDELR3   | NM_006855 | 22q13.1  |
| 207265_s_at | 12 | KDELR3   | NM_016657 | 22q13.1  |
| 203934_at   | 15 | KDR      | NM_002253 | 4q11-q12 |
| 202417_at   | 13 | KEAP1    | NM_012289 | 19p13.2  |
| 221838_at   | 14 | KELCHL   | N38751    | 22q11.21 |
| 49329_at    | 15 | KELCHL   | N38751    | 22q11.21 |
| 209863_s_at | 12 | KET      | AF091627  | 3q27-q29 |
| 200040_at   | 15 | KHDRBS1  | NM_006559 | 1p32     |
| 201488_x_at | 15 | KHDRBS1  | NM_006559 | 1p32     |
| 214185_at   | 15 | KHDRBS1  | AW592227  | 1p32     |
| 204372_s_at | 15 | KHSRP    | AI933301  | 19p13.3  |
| 212303_x_at | 12 | KHSRP    | BG026366  | 19p13.3  |
| 209539_at   | 15 | KIAA0006 | D25304    | Xq26     |
| 214662_at   | 14 | KIAA0007 | D26488    | 2p23.3   |
| 32062_at    | 12 | KIAA0014 | D25216    | 8q24.3   |
| 212622_at   | 15 | KIAA0033 | AU153138  | 11p15.3  |
| 212623_at   | 15 | KIAA0033 | AU153138  | 11p15.3  |
| 212896_at   | 15 | KIAA0052 | D29641    | 5q11.2   |
| 212789_at   | 15 | KIAA0056 | AI796581  | 11q25    |
| 213483_at   | 15 | KIAA0073 | AK025679  | 5q12.3   |
| 36084_at    | 15 | KIAA0076 | D38548    | 6p21.1   |
| 212380_at   | 15 | KIAA0082 | D43949    | 6p21.2   |
| 201729_s_at | 13 | KIAA0100 | NM_014680 | 17q11.2  |
| 202503_s_at | 15 | KIAA0101 | NM_014736 | 15q22.1  |
| 211713_x_at | 13 | KIAA0101 | BC005832  | 15q22.1  |
| 203584_at   | 15 | KIAA0103 | NM_014673 | 8q23.2   |
| 212591_at   | 15 | KIAA0117 | AA887480  | ---      |
| 212399_s_at | 15 | KIAA0121 | D50911    | 3p25.2   |
| 212414_s_at | 15 | KIAA0128 | D50918    | Xq25     |
| 201977_s_at | 15 | KIAA0141 | AI539425  | 5q31.3   |
| 212149_at   | 15 | KIAA0143 | AW470003  | 8q24.22  |
| 212150_at   | 15 | KIAA0143 | AA805651  | 8q24.22  |
| 212523_s_at | 13 | KIAA0146 | D63480    | 8q11.21  |
| 200616_s_at | 14 | KIAA0152 | BC000371  | 12q24.31 |
| 200617_at   | 15 | KIAA0152 | NM_014730 | 12q24.31 |
| 216251_s_at | 15 | KIAA0153 | BF965437  | 22q13.31 |
| 212835_at   | 13 | KIAA0157 | AA777641  | 10q26.2  |
| 212837_at   | 14 | KIAA0157 | D63877    | 10q26.2  |
| 200851_s_at | 15 | KIAA0174 | NM_014761 | 16q22.2  |
| 212846_at   | 14 | KIAA0179 | AA811192  | 21q22.3  |
| 212056_at   | 15 | KIAA0182 | D80004    | 16q24.1  |
| 212057_at   | 15 | KIAA0182 | AA206161  | 16q24.1  |
| 34221_at    | 15 | KIAA0194 | D83778    | 5q33.1   |
| 202650_s_at | 15 | KIAA0195 | NM_014738 | 17q25.3  |
| 201985_at   | 15 | KIAA0196 | NM_014846 | 8p22     |
| 208999_at   | 15 | KIAA0202 | D86957    | 5q31     |

|             |    |                  |           |             |
|-------------|----|------------------|-----------|-------------|
| 208952_s_at | 15 | KIAA0217         | AU154358  | 10p15.3     |
| 208953_at   | 15 | KIAA0217         | AU154358  | 10p15.3     |
| 221992_at   | 10 | KIAA0220         | AI925734  | 16q22.3     |
| 212733_at   | 12 | KIAA0226         | AI798908  | 3q29        |
| 212735_at   | 14 | KIAA0226         | AI798908  | 3q29        |
| 212441_at   | 15 | KIAA0232         | D86985    | 4p16.1      |
| 38892_at    | 13 | KIAA0240         | D87077    | 6p21.1      |
| 212474_at   | 14 | KIAA0241         | D87682    | 7p14.3      |
| 202181_at   | 15 | KIAA0247         | NM_014734 | 14q24.1     |
| 212053_at   | 15 | KIAA0251; LP8165 | AK025504  | 16p13.13    |
| 212301_at   | 15 | KIAA0252         | AI192081  | 15q14       |
| 212302_at   | 15 | KIAA0252         | AI192081  | 15q14       |
| 212450_at   | 15 | KIAA0256         | D87445    | 15q15.3     |
| 212451_at   | 13 | KIAA0256         | N52532    | 15q15.3     |
| 203169_at   | 10 | KIAA0258         | NM_014785 | 9pter-p22.1 |
| 212264_s_at | 15 | KIAA0261         | BE645850  | 10q23.31    |
| 212267_at   | 15 | KIAA0261         | D87450    | 10q23.31    |
| 212145_at   | 15 | KIAA0264         | D87453    | 5q13.2      |
| 209254_at   | 13 | KIAA0265         | AI808625  | 7q32.3      |
| 209255_at   | 15 | KIAA0265         | D87454    | 7q32.3      |
| 210111_s_at | 15 | KIAA0265         | AF277175  | 7q32.3      |
| 212310_at   | 11 | KIAA0268         | D87742    | 1q42.12     |
| 203656_at   | 15 | KIAA0274         | NM_014845 | 6q21        |
| 212851_at   | 15 | KIAA0276         | AA194584  | 4q12        |
| 212855_at   | 14 | KIAA0276         | D87466    | 4q12        |
| 212621_at   | 14 | KIAA0286         | AB006624  | 12q13.2     |
| 210958_s_at | 10 | KIAA0303         | BC003646  | 5q13.1      |
| 40016_g_at  | 15 | KIAA0303         | AB002301  | 5q13.1      |
| 215696_s_at | 15 | KIAA0310         | BC001404  | 9q34.3      |
| 204308_s_at | 15 | KIAA0329         | NM_014844 | 14q32.33    |
| 41386_i_at  | 15 | KIAA0346         | AB002344  | 17p13.1     |
| 41387_r_at  | 13 | KIAA0346         | AB002344  | 17p13.1     |
| 203288_at   | 15 | KIAA0355         | NM_014686 | 19q13.12    |
| 212805_at   | 10 | KIAA0367         | AL138349  | 9q21.31     |
| 212428_at   | 15 | KIAA0368         | AW001101  | 9q32        |
| 214356_s_at | 15 | KIAA0368         | AI272899  | 9q32        |
| 203048_s_at | 15 | KIAA0372         | NM_014639 | 5q15        |
| 203049_s_at | 15 | KIAA0372         | NM_014639 | 5q15        |
| 205250_s_at | 15 | KIAA0373         | NM_014684 | 12q21.33    |
| 212480_at   | 10 | KIAA0376         | AB002374  | 22q11.23    |
| 202713_s_at | 15 | KIAA0391         | AA129755  | 14q13.2     |
| 212319_at   | 11 | KIAA0397         | AB007857  | 17p13.3     |
| 36129_at    | 15 | KIAA0397         | AB007857  | 17p13.3     |
| 212601_at   | 14 | KIAA0399         | AB007859  | 17p13.3     |
| 213300_at   | 15 | KIAA0404         | AW168132  | 11q13.1     |
| 212898_at   | 14 | KIAA0406         | AB007866  | 20q12       |
| 203171_s_at | 14 | KIAA0409         | NM_015324 | 11p15.4     |
| 213304_at   | 15 | KIAA0423         | AI823592  | 14q21.3     |
| 204303_s_at | 12 | KIAA0427         | NM_014772 | 18q21.1     |
| 201854_s_at | 14 | KIAA0431         | AI744148  | 16q23.2     |

|             |    |          |           |               |
|-------------|----|----------|-----------|---------------|
| 212215_at   | 15 | KIAA0436 | AB007896  | 2p22.1        |
| 32091_at    | 15 | KIAA0446 | AB007915  | 1q23.1        |
| 213216_at   | 12 | KIAA0459 | AL537463  | 1p36.13       |
| 212553_at   | 12 | KIAA0460 | AK026120  | 1q21.3        |
| 203900_at   | 13 | KIAA0467 | NM_024547 | ---           |
| 214663_at   | 12 | KIAA0472 | AB007941  | 1q32.1        |
| 202860_at   | 15 | KIAA0476 | NM_014856 | 1p36.13-q31.3 |
| 203958_s_at | 14 | KIAA0478 | AI557467  | 1pter-q31.3   |
| 202271_at   | 15 | KIAA0483 | AB007952  | 1q42.12       |
| 215109_at   | 10 | KIAA0492 | R02172    | ---           |
| 201775_s_at | 14 | KIAA0494 | AA676790  | 1pter-p22.1   |
| 201776_s_at | 15 | KIAA0494 | NM_014774 | 1pter-p22.1   |
| 201778_s_at | 15 | KIAA0494 | NM_014774 | 1pter-p22.1   |
| 213340_s_at | 15 | KIAA0495 | AI073551  | ---           |
| 214954_at   | 10 | KIAA0527 | BF977837  | 3p22.3        |
| 212943_at   | 15 | KIAA0528 | AB011100  | 12p12.2       |
| 36545_s_at  | 14 | KIAA0542 | AB011114  | 22q12.2       |
| 212485_at   | 15 | KIAA0553 | AU146596  | 17q21.31      |
| 212946_at   | 15 | KIAA0564 | AK025432  | 13q13.3       |
| 212675_s_at | 15 | KIAA0582 | AB011154  | 2p14          |
| 205631_at   | 13 | KIAA0586 | NM_014749 | 14q23.1       |
| 37232_at    | 13 | KIAA0586 | AB011158  | 14q23.1       |
| 212929_s_at | 15 | KIAA0592 | W68158    | 10q11.1       |
| 212348_s_at | 15 | KIAA0601 | AB011173  | 1p36.11       |
| 34406_at    | 15 | KIAA0602 | AB011174  | 14q32.33      |
| 206003_at   | 14 | KIAA0635 | NM_014645 | 4q12          |
| 212134_at   | 14 | KIAA0638 | AB014538  | 11q23.3       |
| 205150_s_at | 15 | KIAA0644 | AV724192  | 7p15.1        |
| 205151_s_at | 10 | KIAA0644 | AV724192  | 7p15.1        |
| 212138_at   | 15 | KIAA0648 | AB014548  | 4p14          |
| 212140_at   | 13 | KIAA0648 | AB014548  | 4p14          |
| 203955_at   | 14 | KIAA0649 | NM_014811 | 9q34.3        |
| 212569_at   | 14 | KIAA0650 | AV699744  | 18p11.31      |
| 212577_at   | 14 | KIAA0650 | AA868754  | 18p11.31      |
| 212579_at   | 14 | KIAA0650 | AB014550  | 18p11.31      |
| 203363_s_at | 13 | KIAA0652 | NM_014741 | 11p11.2       |
| 203364_s_at | 14 | KIAA0652 | NM_014741 | 11p11.2       |
| 212775_at   | 15 | KIAA0657 | AI978623  | 2q36.1        |
| 212776_s_at | 13 | KIAA0657 | AI978623  | 2q36.1        |
| 213946_s_at | 13 | KIAA0657 | AI633851  | 2q36.1        |
| 214928_at   | 14 | KIAA0657 | AI915513  | 2q36.1        |
| 205787_x_at | 13 | KIAA0663 | AI803216  | 1q32.1        |
| 212456_at   | 15 | KIAA0664 | AB014564  | 17p13.3       |
| 215232_at   | 10 | KIAA0672 | AK023797  | 17p12         |
| 31826_at    | 15 | KIAA0674 | AB014574  | 9q33.1        |
| 212052_s_at | 15 | KIAA0676 | AB014576  | 5q35.3        |
| 34260_at    | 14 | KIAA0683 | AB014583  | 16p13.3       |
| 212200_at   | 15 | KIAA0692 | AW274877  | 12q24.33      |
| 212201_at   | 13 | KIAA0692 | AW274877  | 12q24.33      |
| 213118_at   | 10 | KIAA0701 | AL136821  | 12q23.2-q23.3 |



|             |    |          |           |                |
|-------------|----|----------|-----------|----------------|
| 212690_at   | 15 | KIAA0725 | AB018268  | 8p11.23        |
| 204403_x_at | 14 | KIAA0738 | NM_014719 | 7q35           |
| 210529_s_at | 12 | KIAA0738 | BC000609  | 7q35           |
| 212979_s_at | 15 | KIAA0738 | AW293343  | 7q35           |
| 212981_s_at | 14 | KIAA0738 | BF030508  | 7q35           |
| 212311_at   | 14 | KIAA0746 | AA522514  | 4p15.31        |
| 212314_at   | 15 | KIAA0746 | AB018289  | 4p15.31        |
| 213099_at   | 15 | KIAA0759 | AB018302  | 14q24.3        |
| 36865_at    | 12 | KIAA0759 | AB018302  | 14q24.3        |
| 212856_at   | 11 | KIAA0767 | AB018310  | 22q13.31       |
| 214961_at   | 15 | KIAA0774 | AI818409  | 13q12.3        |
| 212633_at   | 15 | KIAA0776 | AL132776  | 6q16.3         |
| 212634_at   | 15 | KIAA0776 | AW298092  | 6q16.3         |
| 212840_at   | 15 | KIAA0794 | BG339560  | 3q29           |
| 217100_s_at | 11 | KIAA0794 | AK026451  | 3q29           |
| 212882_at   | 10 | KIAA0795 | AB018338  | 3p21.31        |
| 213358_at   | 12 | KIAA0802 | AB018345  | 18p11.22       |
| 209553_at   | 15 | KIAA0804 | BC001001  | 3q28           |
| 212715_s_at | 14 | KIAA0819 | AB020626  | 22q11.21       |
| 209839_at   | 12 | KIAA0820 | AL136712  | 1q24.1         |
| 212546_s_at | 15 | KIAA0826 | AI126634  | 4p12           |
| 212548_s_at | 14 | KIAA0826 | BF515124  | 4p12           |
| 212814_at   | 10 | KIAA0828 | AB020635  | 7q32.3         |
| 212573_at   | 15 | KIAA0830 | AF131747  | 11q21          |
| 204568_at   | 15 | KIAA0831 | NM_014924 | 14q22.2        |
| 36888_at    | 15 | KIAA0841 | AB020648  | 19q13.13       |
| 212146_at   | 12 | KIAA0842 | AB020649  | 1p36.13        |
| 212402_at   | 14 | KIAA0853 | BE895685  | 13q14.11       |
| 203321_s_at | 15 | KIAA0863 | AK022688  | 18q23          |
| 203322_at   | 14 | KIAA0863 | AU145934  | 18q23          |
| 212975_at   | 14 | KIAA0870 | AB020677  | 8q24.3         |
| 215616_s_at | 12 | KIAA0876 | AB020683  | 19p13.3        |
| 212792_at   | 15 | KIAA0877 | AB020684  | 7p14.3-p14.2   |
| 212956_at   | 15 | KIAA0882 | AI348094  | 4q31.1         |
| 213424_at   | 13 | KIAA0895 | AB020702  | 7p14.1         |
| 212653_s_at | 15 | KIAA0903 | AB020710  | 2p15           |
| 210616_s_at | 15 | KIAA0905 | AB020712  | 4q21.3         |
| 202220_at   | 15 | KIAA0907 | NM_014949 | 1q22           |
| 215170_s_at | 10 | KIAA0912 | AB020719  | 15q15.3        |
| 212359_s_at | 15 | KIAA0913 | W89120    | 10q22.3        |
| 212503_s_at | 15 | KIAA0934 | N22859    | 10p15.3        |
| 212504_at   | 13 | KIAA0934 | N31807    | 10p15.3        |
| 209654_at   | 15 | KIAA0947 | BC004902  | 5p15.32        |
| 212908_at   | 13 | KIAA0962 | AK022530  | 1p36.1         |
| 212911_at   | 13 | KIAA0962 | AB023179  | 1p36.1         |
| 216996_s_at | 15 | KIAA0971 | AK021557  | 2q34           |
| 207705_s_at | 15 | KIAA0980 | NM_025176 | 20p11.22-p11.1 |
| 211383_s_at | 14 | KIAA0982 | AL136827  | 10p15.3        |
| 200907_s_at | 15 | KIAA0992 | AU157932  | 4q32.3         |
| 214672_at   | 15 | KIAA0998 | AB023215  | 14q24.3        |

|             |    |          |           |          |
|-------------|----|----------|-----------|----------|
| 204155_s_at | 13 | KIAA0999 | AA044154  | 11q23.3  |
| 213034_at   | 15 | KIAA0999 | AB023216  | 11q23.3  |
| 203831_at   | 15 | KIAA1002 | NM_014925 | 12q13.2  |
| 213959_s_at | 14 | KIAA1005 | BF515597  | 16q12.2  |
| 212838_at   | 13 | KIAA1010 | AB023227  | 10q24.31 |
| 207305_s_at | 15 | KIAA1012 | NM_014939 | 18q12.1  |
| 203678_at   | 14 | KIAA1018 | NM_014967 | 15q13.1  |
| 212209_at   | 15 | KIAA1025 | AL133033  | 12q24.22 |
| 213478_at   | 15 | KIAA1026 | AB028949  | 1p36.13  |
| 212794_s_at | 15 | KIAA1033 | AK001728  | 12q24.11 |
| 212795_at   | 15 | KIAA1033 | AL137753  | 12q24.11 |
| 215936_s_at | 10 | KIAA1033 | AK001657  | 12q24.11 |
| 212754_s_at | 15 | KIAA1040 | BG548738  | 12q14.1  |
| 215146_s_at | 15 | KIAA1043 | AB028966  | 22q12.1  |
| 213311_s_at | 15 | KIAA1049 | BF000251  | 16q24.3  |
| 221495_s_at | 15 | KIAA1049 | AF322111  | 16q24.3  |
| 212796_s_at | 14 | KIAA1055 | BF195608  | 15q24.1  |
| 201270_x_at | 13 | KIAA1068 | AB028991  | 7p13-p12 |
| 213153_at   | 13 | KIAA1076 | AB028999  | 12q24.31 |
| 212763_at   | 15 | KIAA1078 | AW593213  | 1q32.1   |
| 212765_at   | 15 | KIAA1078 | AB029001  | 1q32.1   |
| 217196_s_at | 14 | KIAA1078 | AL110158  | 1q32.1   |
| 212325_at   | 15 | KIAA1102 | AK026815  | 4p14     |
| 212327_at   | 15 | KIAA1102 | AK026815  | 4p14     |
| 212328_at   | 15 | KIAA1102 | AB029025  | 4p14     |
| 214098_at   | 13 | KIAA1107 | AB029030  | 1p22.1   |
| 212779_at   | 15 | KIAA1109 | AB029032  | 4q28.1   |
| 213271_s_at | 13 | KIAA1117 | AB029040  | 6q15     |
| 221868_at   | 15 | KIAA1155 | AB032981  | 2p13.2   |
| 222111_at   | 14 | KIAA1164 | AU145293  | 15q21.3  |
| 212904_at   | 15 | KIAA1185 | AB033011  | 1p36.32  |
| 44822_s_at  | 14 | KIAA1193 | AW003889  | 19p13.3  |
| 55872_at    | 14 | KIAA1196 | AI493119  | 20q13.33 |
| 212942_s_at | 13 | KIAA1199 | AB033025  | 15q      |
| 221736_at   | 15 | KIAA1219 | BG236163  | 20q12    |
| 213974_at   | 15 | KIAA1233 | AB033059  | 15q25.2  |
| 213387_at   | 15 | KIAA1240 | AB033066  | 2p24.1   |
| 53991_at    | 13 | KIAA1277 | AA127623  | 7q34     |
| 212453_at   | 15 | KIAA1279 | AB033105  | 10q22.1  |
| 219520_s_at | 15 | KIAA1280 | NM_018458 | Xp22.32  |
| 220911_s_at | 10 | KIAA1305 | NM_025081 | ---      |
| 222270_at   | 10 | KIAA1387 | BG540048  | 2p16.2   |
| 221952_x_at | 15 | KIAA1393 | AB037814  | 14q23.1  |
| 213316_at   | 15 | KIAA1462 | AL050154  | ---      |
| 212802_s_at | 15 | KIAA1521 | AK023841  | 9q34.11  |
| 214869_x_at | 15 | KIAA1521 | AK021533  | 9q34.11  |
| 207765_s_at | 12 | KIAA1539 | NM_025182 | 9p13.2   |
| 65438_at    | 11 | KIAA1609 | AA195124  | 16q24.1  |
| 220940_at   | 12 | KIAA1641 | NM_025190 | ---      |
| 212854_x_at | 15 | KIAA1693 | AB051480  | 1p31     |

|             |    |           |           |                 |
|-------------|----|-----------|-----------|-----------------|
| 53968_at    | 14 | KIAA1698  | AI869988  | 11q12.3         |
| 221778_at   | 15 | KIAA1718  | BE217882  | 7q33-q35        |
| 218503_at   | 15 | KIAA1797  | NM_017794 | 9p21            |
| 215629_s_at | 13 | KIAA1799  | AA905286  | ---             |
| 220368_s_at | 12 | KIAA2010  | NM_017936 | 14q32.12        |
| 212162_at   | 15 | KIDINS220 | AK022873  | 2p24            |
| 212163_at   | 15 | KIDINS220 | AB033076  | 2p24            |
| 204444_at   | 13 | KIF11     | NM_004523 | 10q24.1         |
| 202962_at   | 14 | KIF13B    | NM_015254 | 8p21.1          |
| 206364_at   | 15 | KIF14     | NM_014875 | 1pter-q31.3     |
| 219306_at   | 15 | KIF15     | NM_020242 | 3p21.32         |
| 209234_at   | 10 | KIF1B     | BF939474  | 1p36.2          |
| 203087_s_at | 15 | KIF2      | NM_004520 | 5q12-q13        |
| 218755_at   | 14 | KIF20A    | NM_005733 | 5q31            |
| 202183_s_at | 15 | KIF22     | NM_007317 | 16p11.2         |
| 204709_s_at | 14 | KIF23     | NM_004856 | 12q13.12        |
| 213623_at   | 14 | KIF3A     | NM_007054 | 5q31            |
| 203943_at   | 14 | KIF3B     | NM_004798 | 20q11.21        |
| 218355_at   | 15 | KIF4      | AF179308  | Xq13.1          |
| 201991_s_at | 15 | KIF5B     | BF223224  | 10pter-q22.1    |
| 201992_s_at | 14 | KIF5B     | NM_004521 | 10pter-q22.1    |
| 203333_at   | 15 | KIFAP3    | NM_014970 | 1q23.3          |
| 205664_at   | 15 | KIN       | NM_012311 | 10p15-p14       |
| 205051_s_at | 15 | KIT       | NM_000222 | 4q11-q12        |
| 205978_at   | 12 | KL        | NM_004795 | 13q12           |
| 204176_at   | 14 | KLEIP     | AA808694  | 1q24.1-q24.3    |
| 202393_s_at | 15 | KLF10     | NM_005655 | 8q22.2          |
| 218486_at   | 15 | KLF11     | AA149594  | 2p25            |
| 219371_s_at | 15 | KLF2      | NM_016270 | 19p13.13-p13.11 |
| 221841_s_at | 15 | KLF4      | BF514079  | 9q31            |
| 204334_at   | 15 | KLF7      | AA488672  | 2q32            |
| 203543_s_at | 12 | KLF9      | NM_001206 | 9q13            |
| 217906_at   | 15 | KLHDC2    | NM_014315 | 14q21.3-q22.1   |
| 208784_s_at | 15 | KLHDC3    | BC001793  | 6p21.1          |
| 214383_x_at | 15 | KLHDC3    | BF063121  | 6p21.1          |
| 221219_s_at | 14 | KLHDC4    | NM_017566 | 16q24.3         |
| 219931_s_at | 10 | KLHL12    | NM_021633 | 1q32.1          |
| 219157_at   | 15 | KLHL2     | NM_007246 | 4q21.2          |
| 204177_s_at | 14 | KLHL20    | NM_014458 | 1q24.1-q24.3    |
| 210635_s_at | 13 | KLHL20    | BC005253  | 1q24.1-q24.3    |
| 203068_at   | 14 | KLHL21    | NM_014851 | 1p36.23         |
| 206551_x_at | 14 | KLHL24    | NM_017644 | 3q27.3          |
| 221221_s_at | 15 | KLHL3     | NM_017415 | 5q31            |
| 220238_s_at | 15 | KLHL7     | NM_018846 | 7p15.3          |
| 220239_at   | 15 | KLHL7     | NM_018846 | 7p15.3          |
| 213117_at   | 13 | KLHL9     | AW138594  | 9p22            |
| 213233_s_at | 15 | KLHL9     | AA460694  | 9p22            |
| 216338_s_at | 15 | KLIP1     | AK021433  | 6p21.1          |
| 210667_s_at | 15 | KNP-I     | D86062    | 21q22.3         |
| 212877_at   | 15 | KNS2      | AA284075  | 14q32.3         |

|             |    |              |           |               |
|-------------|----|--------------|-----------|---------------|
| 212878_s_at | 15 | KNS2         | AA284075  | 14q32.3       |
| 213656_s_at | 15 | KNS2         | BF593594  | 14q32.3       |
| 206316_s_at | 10 | KNTC1        | NM_014708 | 12q24.31      |
| 204162_at   | 14 | KNTC2        | NM_006101 | 18p11.31      |
| 210715_s_at | 15 | kop          | AF027205  | 19q13.1       |
| 209538_at   | 15 | KOX30        | U69645    | 10q22-q25     |
| 202055_at   | 10 | KPNA1        | AW051311  | 3q21          |
| 202056_at   | 13 | KPNA1        | AW051311  | 3q21          |
| 202058_s_at | 14 | KPNA1        | BC002374  | 3q21          |
| 202059_s_at | 13 | KPNA1        | NM_002264 | 3q21          |
| 213741_s_at | 14 | KPNA1        | BF575685  | 3q21          |
| 201088_at   | 15 | KPNA2        | NM_002266 | 17q23.1-q23.3 |
| 211762_s_at | 15 | KPNA2        | BC005978  | 17q23.1-q23.3 |
| 221502_at   | 15 | KPNA3        | AL120704  | 13q14.3       |
| 221503_s_at | 15 | KPNA3        | AL120704  | 13q14.3       |
| 212102_s_at | 11 | KPNA6        | BG403834  | 1p35.1-p34.3  |
| 208974_x_at | 15 | KPNB1        | BC003572  | 17q21.32      |
| 208975_s_at | 10 | KPNB1        | BC003572  | 17q21.32      |
| 213507_s_at | 15 | KPNB1        | BG249565  | 17q21.32      |
| 213573_at   | 15 | KPNB1        | AA861608  | 17q21.32      |
| 213574_s_at | 15 | KPNB1        | AA861608  | 17q21.32      |
| 213803_at   | 15 | KPNB1        | BG545463  | 17q21.32      |
| 204009_s_at | 15 | KRAS         | NM_004985 | 12p12.1       |
| 204010_s_at | 13 | KRAS         | NM_004985 | 12p12.1       |
| 214352_s_at | 15 | KRAS2        | BF673699  | 12p12.1       |
| 34031_i_at  | 15 | Krit1        | U90269    | 7q21-q22      |
| 205900_at   | 11 | KRT1         | NM_006121 | 12q12-q13     |
| 207023_x_at | 15 | KRT10        | NM_000421 | 17q21         |
| 210633_x_at | 15 | KRT10        | M19156    | 17q21         |
| 201596_x_at | 15 | KRT18        | NM_000224 | 12q13         |
| 215189_at   | 11 | KRTHB6       | X99142    | 12q13         |
| 200914_x_at | 15 | KTN1         | NM_004986 | 14q22.1       |
| 200915_x_at | 15 | KTN1         | NM_004986 | 14q22.1       |
| 214709_s_at | 15 | KTN1         | Z22551    | 14q22.1       |
| 217915_s_at | 15 | L30          | AF165521  | 15q21         |
| 213837_at   | 14 | L3MBTL       | Z98752    | 20q13.12      |
| 210306_at   | 12 | L3MBTL1      | U89358    | 20q13.12      |
| 209387_s_at | 15 | L6           | M90657    | 3q21-q25      |
| 216804_s_at | 15 | L9; ENH; LIM | AK027217  | 4q22          |
| 211207_s_at | 12 | LACS5        | AF129166  | 5q31          |
| 218701_at   | 13 | LACTB2       | NM_016027 | 8p22-q22.3    |
| 205116_at   | 15 | LAMA2        | NM_000426 | 6q22-q23      |
| 213519_s_at | 15 | LAMA2        | AI078169  | 6q22-q23      |
| 202202_s_at | 15 | LAMA4        | NM_002290 | 6q21          |
| 210089_s_at | 13 | LAMA4        | BC004241  | 6q21          |
| 210150_s_at | 13 | LAMA5        | BC003355  | 20q13.2-q13.3 |
| 201505_at   | 15 | LAMB1        | NM_002291 | 7q22          |
| 211651_s_at | 15 | LAMB1        | M20206    | 7q22 /// 7q22 |
| 216264_s_at | 15 | LAMB2        | X79683    | 3p21 /// 3p21 |
| 200770_s_at | 15 | LAMC1        | NM_002293 | 1q31          |

|             |    |          |           |                 |
|-------------|----|----------|-----------|-----------------|
| 200771_at   | 15 | LAMC1    | NM_002293 | 1q31            |
| 216840_s_at | 15 | LAMM     | AK026829  | 6q22-q23        |
| 201551_s_at | 13 | LAMP1    | NM_005561 | 13q34           |
| 201552_at   | 15 | LAMP1    | NM_005561 | 13q34           |
| 201553_s_at | 15 | LAMP1    | NM_005561 | 13q34           |
| 200821_at   | 15 | LAMP2    | NM_013995 | Xq24            |
| 203041_s_at | 15 | LAMP2    | NM_002294 | Xq24            |
| 203042_at   | 14 | LAMP2    | NM_002294 | Xq24            |
| 213801_x_at | 15 | LAMR1    | AW304232  | 3p21.3          |
| 202019_s_at | 11 | LANCL1   | AI935255  | 2q33-q35        |
| 202020_s_at | 15 | LANCL1   | NM_006055 | 2q33-q35        |
| 212408_at   | 15 | LAP1B    | AK023204  | 1q24.2          |
| 212409_s_at | 14 | LAP1B    | AK021613  | 1q24.2          |
| 217933_s_at | 15 | LAP3     | NM_015907 | 4p15.33         |
| 200673_at   | 15 | LAPTM4A  | NM_014713 | 2p24.3          |
| 208029_s_at | 15 | LAPTM4B  | NM_018407 | 8q22.1          |
| 208767_s_at | 15 | LAPTM4B  | AW149681  | 8q22.1          |
| 214039_s_at | 15 | LAPTM4B  | T15777    | 8q22.1          |
| 201720_s_at | 10 | LAPTM5   | AI589086  | 1p34            |
| 201721_s_at | 15 | LAPTM5   | NM_006762 | 1p34            |
| 212137_at   | 15 | LARP     | AV746402  | ---             |
| 208954_s_at | 15 | LARP5    | BC003381  | 10p15.3         |
| 218651_s_at | 15 | LARP6    | NM_018357 | 15q22.32        |
| 204016_at   | 13 | LARS2    | NM_015340 | 3p21.3          |
| 34764_at    | 15 | LARS2    | D21851    | 3p21.3          |
| 200618_at   | 15 | LASP1    | NM_006148 | 17q11-q21.3     |
| 222212_s_at | 15 | LASS2    | AK001105  | 1q21.3          |
| 212442_s_at | 15 | LASS6    | BG289001  | 2q31.1          |
| 212446_s_at | 15 | LASS6    | AI658534  | 2q31.1          |
| 208118_x_at | 11 | LAT1-3TM | NM_031211 | 16p12           |
| 211768_at   | 12 | LAT2     | BC006080  | 7q11.23         |
| 213261_at   | 14 | LBA1     | AA035414  | 3p22.1          |
| 221011_s_at | 15 | LBH      | NM_030915 | 2p23.3          |
| 201795_at   | 15 | LBR      | NM_002296 | 1q42.1          |
| 212588_at   | 12 | LCA      | Y00062    | 1q31-q32        |
| 216203_at   | 14 | LCB2     | U15555    | 14q24.3-q31     |
| 209827_s_at | 13 | LCF      | M90391    | 15q26.3         |
| 221515_s_at | 15 | LCMT1    | BC001214  | 16p12.3-16p12.1 |
| 204012_s_at | 10 | LCMT2    | AL529189  | 15q15.1         |
| 206481_s_at | 15 | LDB2     | NM_001290 | 4p16            |
| 213371_at   | 15 | LDB3     | AI803302  | 10q22.3-q23.2   |
| 213717_at   | 15 | LDB3     | AA211481  | 10q22.3-q23.2   |
| 200650_s_at | 15 | LDHA     | NM_005566 | 11p15.4         |
| 201030_x_at | 15 | LDHB     | NM_002300 | 12p12.2-p12.1   |
| 202068_s_at | 15 | LDLR     | NM_000527 | 19p13.3         |
| 209866_s_at | 13 | LEC3     | AF307080  | 4q13.1          |
| 221558_s_at | 12 | LEF1     | AF288571  | 4q23-q25        |
| 206012_at   | 14 | LEFTY2   | NM_003240 | 1q42.1          |
| 218604_at   | 15 | LEMD3    | NM_014319 | 12q14           |
| 202377_at   | 15 | LEPR     | AW026535  | 1p31            |

|             |    |             |           |                   |
|-------------|----|-------------|-----------|-------------------|
| 209894_at   | 15 | LEPR        | U50748    | 1p31              |
| 220750_s_at | 14 | LEPRE1      | NM_022356 | 1p34.1            |
| 218717_s_at | 12 | LEPREL1     | NM_018192 | 3q29              |
| 202378_s_at | 15 | LEPROT      | NM_017526 | 1p31              |
| 202594_at   | 15 | LEPROTL1    | NM_015344 | 8p21.2-p21.1      |
| 202595_s_at | 15 | LEPROTL1    | BC000642  | 8p21.2-p21.1      |
| 201593_s_at | 15 | LEREPO4     | AV716798  | 2q32.2            |
| 201595_s_at | 15 | LEREPO4     | NM_018471 | 2q32.2            |
| 207170_s_at | 15 | LETMD1      | NM_015416 | 12q13.13          |
| 217810_x_at | 15 | LEUS        | D84223    | 5q32              |
| 216942_s_at | 15 | LFA3; LFA-3 | D28586    | 1p13              |
| 201105_at   | 15 | LGALS1      | NM_002305 | 22q13.1           |
| 220158_at   | 10 | LGALS14     | NM_020129 | 19q13.2           |
| 208949_s_at | 15 | LGALS3      | BC001120  | 14q21-q22         |
| 200923_at   | 14 | LGALS3BP    | NM_005567 | 17q25             |
| 208934_s_at | 15 | LGALS8      | AI659005  | 1q42-q43          |
| 208936_x_at | 15 | LGALS8      | AI659005  | 1q42-q43          |
| 210731_s_at | 15 | LGALS8      | AL136105  | 1q42-q43          |
| 210732_s_at | 14 | LGALS8      | AL136105  | 1q42-q43          |
| 218326_s_at | 15 | LGR4        | NM_018490 | 11p14-p13         |
| 218253_s_at | 15 | LGTN        | NM_006893 | 1q31-q32          |
| 218656_s_at | 15 | LHFP        | NM_005780 | 13q12             |
| 212658_at   | 15 | LHFPL2      | N66633    | 5q14.1            |
| 219884_at   | 13 | LHX6        | NM_014368 | 9q34.11           |
| 214045_at   | 11 | LIAS        | BF056778  | 4p14              |
| 205876_at   | 13 | LIFR        | NM_002310 | 5p13-p12          |
| 202347_s_at | 15 | LIG         | AB022435  | 4p14              |
| 206235_at   | 10 | LIG4        | NM_002312 | 13q33-q34         |
| 208987_s_at | 10 | LILINA      | AF179221  | 11q13.1           |
| 218850_s_at | 13 | LIMD1       | NM_014240 | 3p21.3            |
| 202193_at   | 14 | LIMK2       | NM_005569 | 22q12.2           |
| 210582_s_at | 10 | LIMK2       | AL117466  | 22q12.2           |
| 207198_s_at | 15 | LIMS1       | NM_004987 | 2q12.3            |
| 212687_at   | 15 | LIMS1       | AL110164  | 2q12.3            |
| 220765_s_at | 15 | LIMS2       | NM_017980 | 2q21.1            |
| 206440_at   | 11 | LIN7A       | NM_004664 | 12q21             |
| 219760_at   | 15 | LIN7B       | NM_022165 | 19q13.33          |
| 219399_at   | 13 | LIN7C       | NM_018362 | 11p14 /// 11p14   |
| 221568_s_at | 13 | LIN7C       | N63709    | 11p14             |
| 201847_at   | 15 | LIPA        | NM_000235 | 10q23.2-q23.3     |
| 205571_at   | 15 | LIPT1       | NM_015929 | 2q11.2            |
| 200815_s_at | 15 | LIS1        | L13386    | 17p13.3           |
| 200706_s_at | 14 | LITAF       | NM_004862 | 16p13.3-p12       |
| 202386_s_at | 15 | LKAP        | NM_019081 | 16p13.13          |
| 210852_s_at | 13 | LKRSDH      | AF229180  | 7q31.3            |
| 214829_at   | 12 | LKRSDH      | AK023446  | 7q31.3            |
| 203713_s_at | 15 | LLGL2       | NM_004524 | 17q24-q25         |
| 216387_x_at | 12 | LLT1        | AL353580  | ---               |
| 200805_at   | 15 | LMAN2       | NM_006816 | 5q35.3            |
| 221274_s_at | 15 | LMAN2L      | NM_030805 | 2q11.2 /// 2q11.2 |

|             |    |                     |           |              |
|-------------|----|---------------------|-----------|--------------|
| 220036_s_at | 15 | LMBR1L              | NM_018113 | 12q13.12     |
| 218191_s_at | 15 | LMBRD1              | NM_018368 | 6q13         |
| 218574_s_at | 15 | LMCD1               | NM_014583 | 3p26-p24     |
| 203411_s_at | 15 | LMNA                | NM_005572 | 1q21.2-q21.3 |
| 214213_x_at | 14 | LMNA                | AA063189  | 1q21.2-q21.3 |
| 203276_at   | 13 | LMNB1               | NM_005573 | 5q23.3-q31.1 |
| 216952_s_at | 12 | LMNB2               | M94363    | ---          |
| 204249_s_at | 15 | LMO2                | NM_005574 | 11p13        |
| 209204_at   | 10 | LMO4                | AI824831  | 1p22.3       |
| 209205_s_at | 15 | LMO4                | BC003600  | 1p22.3       |
| 202674_s_at | 12 | LMO7                | NM_005358 | 13q21.33     |
| 203320_at   | 15 | LNK                 | NM_005475 | 12q24        |
| 216187_x_at | 15 | LNX1                | AF222691  | ---          |
| 48117_at    | 11 | LOC112869           | AA160496  | 16p12.1      |
| 212714_at   | 15 | LOC113251           | AL050205  | 12q13.12     |
| 216547_at   | 15 | LOC127406           | AL353681  | ---          |
| 212017_at   | 15 | LOC130074           | BF677404  | 2q21.2       |
| 212934_at   | 14 | LOC137886           | AI245523  | 8q12.1       |
| 212080_at   | 13 | LOC143941           | AV714029  | 11q23        |
| 216559_x_at | 15 | LOC144983           | AL050348  | ---          |
| 213527_s_at | 15 | LOC146542           | AC002310  | 16p11.2      |
| 222039_at   | 14 | LOC146909           | AA292789  | 17q21.31     |
| 212155_at   | 15 | LOC149603           | AA085748  | 1q42.13      |
| 213703_at   | 15 | LOC150759           | W95043    | 2q11.2       |
| 221973_at   | 14 | LOC150759           | AI983904  | ---          |
| 212098_at   | 15 | LOC151162           | AL134724  | ---          |
| 215978_x_at | 14 | LOC152719           | AK021514  | ---          |
| 212731_at   | 15 | LOC157567           | U79297    | 8q22.3       |
| 213212_x_at | 14 | LOC161527           | AI632181  | ---          |
| 212697_at   | 15 | LOC162427           | AL515874  | 17q21.31     |
| 211325_x_at | 14 | LOC171220           | U72518    | 12p13.31     |
| 212866_at   | 10 | LOC203069           | AI081543  | 8p21.2       |
| 35156_at    | 15 | LOC203069           | AL050297  | 8p21.2       |
| 213510_x_at | 15 | LOC220594           | AW194543  | 17p11.2      |
| 214920_at   | 14 | LOC221981           | R33964    | 7p21.3       |
| 213078_x_at | 11 | LOC254531           | AI889513  | 15q13.2      |
| 65630_at    | 13 | LOC283232           | AI742455  | 11p15.5      |
| 214719_at   | 11 | LOC283537           | AK026720  | 13q12.3      |
| 217520_x_at | 12 | LOC283683           | BG396614  | 15q12        |
| 210242_x_at | 15 | LOC283687           | AF249277  | 15q24.3      |
| 213391_at   | 15 | LOC286148           | AI669947  | 8q22.1       |
| 59433_at    | 14 | LOC286434           | N32185    | ---          |
| 209733_at   | 10 | LOC286440           | AL034399  | ---          |
| 214035_x_at | 15 | LOC339047           | AA308853  | ---          |
| 214870_x_at | 15 | LOC339047           | AC002045  | ---          |
| 221501_x_at | 15 | LOC339047; KIAA0220 | AF229069  | 16p13.12     |
| 50374_at    | 15 | LOC339229           | AA150503  | ---          |
| 212708_at   | 15 | LOC339287           | AV721987  | 17q21.2      |
| 222000_at   | 15 | LOC339448           | AI915947  | 1p36.32      |
| 213360_s_at | 15 | LOC340318           | AA514622  | 7q11.23      |

|             |    |           |           |                 |
|-------------|----|-----------|-----------|-----------------|
| 217365_at   | 11 | LOC343070 | AL022101  | ---             |
| 213408_s_at | 15 | LOC375133 | AK024034  | 22q11.21        |
| 216505_x_at | 15 | LOC376693 | AL118502  | ---             |
| 214946_x_at | 15 | LOC387680 | AV728658  | 10q11.23        |
| 213689_x_at | 15 | LOC388650 | AL137958  | 1p22.1          |
| 65588_at    | 15 | LOC388796 | AA827892  | 20q12           |
| 222370_x_at | 13 | LOC388906 | N57781    | ---             |
| 65472_at    | 10 | LOC388969 | AI161338  | 2p11.2          |
| 222368_at   | 14 | LOC389634 | AW972351  | ---             |
| 51228_at    | 14 | LOC389677 | N36928    | 8q22.1          |
| 213556_at   | 13 | LOC390940 | BE673445  | 19q13.32        |
| 51158_at    | 10 | LOC400451 | AI801973  | ---             |
| 215283_at   | 15 | LOC400642 | U79248    | 18p11.31        |
| 217506_at   | 15 | LOC400642 | H49382    | 18p11.31        |
| 210396_s_at | 15 | LOC440354 | AF271775  | 16p12.1         |
| 222207_x_at | 15 | LOC441258 | AK024602  | ---             |
| 201871_s_at | 15 | LOC51035  | NM_015853 | 11q12.3         |
| 218303_x_at | 15 | LOC51315  | NM_016618 | 2p11.2          |
| 210718_s_at | 15 | LOC51326  | AF119889  | 17q21.32        |
| 220014_at   | 14 | LOC51334  | NM_016644 | 5q23.2          |
| 51774_s_at  | 15 | LOC51619  | AW014299  | 7p13            |
| 58900_at    | 15 | LOC51619  | AW025284  | 7p13            |
| 65521_at    | 14 | LOC51619  | W74577    | ---             |
| 213142_x_at | 15 | LOC54103  | AV700415  | 7q21.11         |
| 222150_s_at | 15 | LOC54103  | AK026747  | 7q21.11         |
| 201921_at   | 15 | LOC552891 | NM_004125 | 9q32            |
| 218484_at   | 15 | LOC56901  | NM_020142 | 12q13.2         |
| 203622_s_at | 11 | LOC56902  | NM_020143 | 2p13.3          |
| 213272_s_at | 15 | LOC57146  | AF070596  | 16p12           |
| 203897_at   | 15 | LOC57149  | BE963444  | 16p11.2         |
| 209679_s_at | 14 | LOC57228  | BC003379  | 12q13.13        |
| 218263_s_at | 15 | LOC58486  | NM_021211 | 11p15.3         |
| 220770_s_at | 15 | LOC63920  | NM_022090 | 5q34            |
| 220020_at   | 11 | LOC63929  | NM_022098 | 22q13.31-q13.33 |
| 44669_at    | 15 | LOC644096 | N31716    | ---             |
| 217653_x_at | 12 | LOC653471 | AW150065  | ---             |
| 221249_s_at | 15 | LOC81558  | NM_030802 | 17q21.33        |
| 208107_s_at | 14 | LOC81691  | NM_030941 | 16p13.11        |
| 215215_s_at | 14 | LOC81691  | AC004381  | 16p13.11        |
| 214748_at   | 15 | LOC88523  | U50529    | 13q12.3         |
| 221823_at   | 13 | LOC90355  | AL565741  | 5q21.2          |
| 91952_at    | 14 | LOC90379  | AI363375  | 19p13.13        |
| 221825_at   | 15 | LOC90806  | BE671941  | 1q32.3          |
| 221826_at   | 11 | LOC90806  | BE671941  | 1q32.3          |
| 213502_x_at | 10 | LOC91316  | AA398569  | 22q11.23        |
| 212957_s_at | 14 | LOC92249  | AU154785  | Xq11.2          |
| 213220_at   | 15 | LOC92482  | AV706096  | ---             |
| 213224_s_at | 15 | LOC92482  | AK025724  | ---             |
| 213455_at   | 15 | LOC92689  | W87466    | 4p14            |
| 213346_at   | 15 | LOC93081  | BE748563  | 13q33.1         |



|             |    |            |           |                   |
|-------------|----|------------|-----------|-------------------|
| 221740_x_at | 15 | LOC9884    | AI140364  | 17q24.2           |
| 205011_at   | 13 | LOH11CR2A  | NM_014622 | 11q23             |
| 210102_at   | 12 | LOH11CR2A  | BC001234  | 11q23             |
| 220244_at   | 14 | LOH3CR2A   | NM_013343 | 3p24-26           |
| 204298_s_at | 15 | LOX        | NM_002317 | 5q23.2            |
| 215446_s_at | 15 | LOX        | L16895    | ---               |
| 203570_at   | 13 | LOXL1      | NM_005576 | 15q24-q25         |
| 202998_s_at | 15 | LOXL2      | AF117949  | 8p21.3-p21.2      |
| 212047_s_at | 12 | LP2254     | AK025329  | 17p13.3           |
| 208816_x_at | 11 | LPC2B      | M62898    | ---               |
| 202651_at   | 15 | LPGAT1     | NM_014873 | 1p36.13-q42.3     |
| 47560_at    | 10 | LPHN1      | AI525402  | 19p13.2           |
| 206953_s_at | 15 | LPHN2      | NM_012302 | 1p31.1            |
| 212276_at   | 15 | LPIN1      | D80010    | 2p25.1            |
| 202459_s_at | 15 | LPIN2      | NM_014646 | 18p11.31          |
| 202460_s_at | 12 | LPIN2      | NM_014646 | 18p11.31          |
| 203548_s_at | 15 | LPL        | BF672975  | 8p22              |
| 203549_s_at | 15 | LPL        | NM_000237 | 8p22              |
| 203007_x_at | 15 | LPL1       | AF077198  | 8q11.23           |
| 215280_s_at | 14 | LPNA3      | AK023850  | 19q13.33          |
| 202822_at   | 15 | LPP        | BF221852  | 3q27-q28          |
| 209147_s_at | 15 | LPP1       | AB000888  | 5q11              |
| 209355_s_at | 15 | LPP3       | AB000889  | 1pter-p22.1       |
| 213496_at   | 13 | LPPR4      | AW592563  | 1p21.3            |
| 216250_s_at | 13 | LPXN       | X77598    | 11q12.1           |
| 220532_s_at | 15 | LR8        | NM_014020 | 7q36.1            |
| 212692_s_at | 15 | LRBA       | W60686    | 4q31.23           |
| 214109_at   | 15 | LRBA       | AI659561  | 4q31.23           |
| 36907_at    | 10 | LRBP; MVLK | M88468    | 12q24             |
| 37796_at    | 12 | LRCH4      | AF053356  | 7q22              |
| 219491_at   | 12 | LRFN4      | NM_024036 | 11q13.1           |
| 211596_s_at | 14 | LRIG1      | AB050468  | --- /// ---       |
| 205953_at   | 15 | LRIG2      | NM_014813 | 1p13.1            |
| 201412_at   | 15 | LRP10      | NM_014045 | 14q11.2           |
| 219631_at   | 15 | LRP12      | NM_024937 | 8q22.2-q23.1      |
| 219188_s_at | 15 | LRP16      | BC000270  | 11q11             |
| 34697_at    | 12 | LRP6       | AF074264  | 12p11-p13         |
| 201186_at   | 15 | LRPAP1     | NM_002337 | 4p16.3            |
| 211615_s_at | 15 | LRPPRC     | M92439    | 2p22.1 /// 2p22.1 |
| 211971_s_at | 15 | LRPPRC     | AI653608  | 2p22.1            |
| 205381_at   | 15 | LRRC17     | NM_005824 | 7q22.1            |
| 219949_at   | 15 | LRRC2      | NM_024512 | 3p21.31           |
| 218550_s_at | 12 | LRRC20     | NM_018205 | 10q22.2           |
| 203835_at   | 14 | LRRC32     | NM_005512 | 11q13.5-q14       |
| 218577_at   | 15 | LRRC40     | NM_017768 | 1p31.2            |
| 201932_at   | 13 | LRRC41     | NM_006369 | 1p34.1            |
| 219338_s_at | 15 | LRRC49     | NM_017691 | 15q22.32          |
| 218245_at   | 12 | LRRC54     | NM_015516 | 11q13.3           |
| 206483_at   | 10 | LRRC6      | NM_012472 | 8q24.22           |
| 218684_at   | 14 | LRRC8D     | NM_018103 | 1p22.2            |

|             |    |         |           |                   |
|-------------|----|---------|-----------|-------------------|
| 201861_s_at | 15 | LRRFIP1 | BF965566  | ---               |
| 201862_s_at | 15 | LRRFIP1 | NM_004735 | 2q37.3            |
| 211452_x_at | 15 | LRRFIP1 | AF130054  | 2q37.3            |
| 218364_at   | 15 | LRRFIP2 | NM_017724 | 3p22.1            |
| 220610_s_at | 15 | LRRFIP2 | NM_006309 | 3p22.1            |
| 209841_s_at | 15 | LRRN3   | AI221950  | 7q31.1            |
| 203534_at   | 15 | LSM1    | NM_014462 | 8p11.2            |
| 202209_at   | 15 | LSM3    | NM_014463 | 3p25.1            |
| 202736_s_at | 15 | LSM4    | AA112507  | 19p13.11          |
| 202737_s_at | 15 | LSM4    | AA112507  | 19p13.11          |
| 202904_s_at | 13 | LSM5    | AU153477  | 7p14.3            |
| 211747_s_at | 15 | LSM5    | BC005938  | 7p14.3 /// 7p14.3 |
| 205036_at   | 15 | LSM6    | NM_007080 | 4q31.21           |
| 204559_s_at | 15 | LSM7    | NM_016199 | 19p13.3           |
| 219119_at   | 15 | LSM8    | NM_016200 | 7q31.1-q31.3      |
| 214110_s_at | 15 | LSP1    | BF195104  | ---               |
| 220171_x_at | 11 | LSR7    | NM_018559 | 13q13-q14         |
| 202245_at   | 15 | LSS     | AW084510  | 21q22.3           |
| 208771_s_at | 15 | LTA4H   | J02959    | 12q22             |
| 202728_s_at | 14 | LTBP1   | AI986120  | 2p22-p21          |
| 202729_s_at | 15 | LTBP1   | AI986120  | 2p22-p21          |
| 204682_at   | 14 | LTBP2   | NM_000428 | 14q24             |
| 219922_s_at | 15 | LTBP3   | NM_021070 | 11q12             |
| 204442_x_at | 15 | LTBP4   | NM_003573 | 19q13.1-q13.2     |
| 40093_at    | 15 | LU      | X83425    | 19q13.2           |
| 220143_x_at | 14 | LUC7L   | NM_018032 | 16p13.3           |
| 217842_at   | 14 | LUC7L2  | NM_016019 | 7q34              |
| 220099_s_at | 15 | LUC7L2  | NM_016007 | 7q34              |
| 201394_s_at | 15 | LUCA15  | U23946    | 3p21.3            |
| 201395_at   | 15 | LUCA15  | U23946    | 3p21.3            |
| 201744_s_at | 15 | LUM     | NM_002345 | 12q21.3-q22       |
| 221832_s_at | 15 | LUZP1   | AV741657  | 1p36.11           |
| 219588_s_at | 13 | LUZP5   | NM_017760 | 7q36.3            |
| 218729_at   | 15 | LXN     | NM_020169 | 3q25.32           |
| 219860_at   | 15 | LY6G5C  | NM_025262 | 6p21.31           |
| 206773_at   | 15 | LY6H    | NM_002347 | 8q24.3            |
| 206584_at   | 15 | LY96    | NM_015364 | 8q13.3            |
| 52169_at    | 14 | LYK5    | AI302185  | 17q24.2           |
| 202625_at   | 15 | LYN     | AI356412  | 8q13              |
| 202626_s_at | 15 | LYN     | AI356412  | 8q13              |
| 212449_s_at | 15 | LYPLA1  | BG288007  | 8q11.23           |
| 202292_x_at | 15 | LYPLA2  | NM_007260 | 1p36.12-p35.1     |
| 216606_x_at | 15 | LYPLA2  | AL050332  | ---               |
| 204458_at   | 15 | LYPLA3  | AL110209  | 16q22.1           |
| 212248_at   | 13 | LYRIC   | AI886796  | 8q22.1            |
| 212250_at   | 15 | LYRIC   | AV700332  | 8q22.1            |
| 212251_at   | 15 | LYRIC   | AI972475  | 8q22.1            |
| 202169_s_at | 15 | LYS2    | AF302110  | 11q22             |
| 202170_s_at | 15 | LYS2    | AF151057  | 11q22             |
| 204076_at   | 15 | LYSAL1  | AB002390  | 8p21.2            |

|             |    |             |           |                |
|-------------|----|-------------|-----------|----------------|
| 203518_at   | 13 | LYST        | NM_000081 | 1q42.1-q42.2   |
| 210943_s_at | 13 | LYST        | U84744    | 1q42.1-q42.2   |
| 213975_s_at | 12 | LYZ         | AV711904  | 12q14.3        |
| 218437_s_at | 15 | LZTFL1      | AA843132  | 3p21.3         |
| 203412_at   | 15 | LZTR1       | NM_006767 | 22q11.21       |
| 200722_s_at | 15 | M11S1       | BG258784  | 11p13          |
| 215049_x_at | 15 | M130; MM130 | Z22969    | 12p13.3        |
| 201383_s_at | 11 | M17S2       | AL044170  | ---            |
| 209026_x_at | 15 | M40         | AF141349  | 6p21.32        |
| 212320_at   | 15 | M40         | BC001002  | 6p21.32        |
| 208677_s_at | 15 | M6          | L20471    | 19p13.3        |
| 200900_s_at | 15 | M6PR        | AI583537  | 12p13          |
| 200901_s_at | 15 | M6PR        | AI583537  | 12p13          |
| 202122_s_at | 14 | M6PRBP1     | NM_005817 | 19p13.3        |
| 221494_x_at | 15 | M9          | AF085358  | 19q13.2        |
| 203345_s_at | 15 | M96         | AI566096  | 1p22.1         |
| 203346_s_at | 14 | M96         | AF072814  | 1p22.1         |
| 209704_at   | 13 | M96         | AL523380  | 1p22.1         |
| 209705_at   | 15 | M96         | BG033764  | 1p22.1         |
| 212279_at   | 15 | MAC30       | BE779865  | 17q11.2        |
| 212281_s_at | 15 | MAC30       | BF038366  | 17q11.2        |
| 212282_at   | 15 | MAC30       | BE779865  | 17q11.2        |
| 207358_x_at | 15 | MACF1       | NM_012090 | 1p32-p31       |
| 208633_s_at | 15 | MACF1       | W61052    | 1p32-p31       |
| 201670_s_at | 15 | MACS        | M68956    | 6q22.2         |
| 204857_at   | 14 | MAD1L1      | NM_003550 | 7p22           |
| 203362_s_at | 15 | MAD2L1      | NM_002358 | 4q27           |
| 203094_at   | 15 | MAD2L1BP    | NM_014628 | 6p21.1         |
| 212346_s_at | 11 | MAD4        | AK026392  | 4p16.3         |
| 210752_s_at | 12 | MAD7        | AF213666  | 17q21.1        |
| 217909_s_at | 15 | MAD7        | AF213668  | 17q21.1        |
| 217910_x_at | 15 | MAD7        | AF213668  | ---            |
| 208037_s_at | 14 | MADCAM1     | NM_007164 | 19p13.3        |
| 38398_at    | 15 | MADD        | AB002356  | 11p11.2        |
| 203076_s_at | 15 | MADR2       | U65019    | 18q21.1        |
| 207922_s_at | 15 | MAEA        | NM_005882 | 4p16.3         |
| 209348_s_at | 15 | MAF         | BF508646  | 16q22-q23      |
| 36711_at    | 15 | MAFF        | AL021977  | 22q13.1        |
| 213627_at   | 15 | MAGED2      | AI924630  | Xp11.2         |
| 210882_s_at | 10 | MAGED3      | U04811    | Xp11.22-p11.21 |
| 221261_x_at | 15 | MAGED4      | NM_030801 |                |
| 218176_at   | 15 | MAGEF1      | NM_022149 | 3q13           |
| 218573_at   | 15 | MAGEH1      | NM_014061 | Xp11.22        |
| 206144_at   | 14 | MAGI1       | NM_004742 | 3p14.1         |
| 218969_at   | 15 | Magmas      | NM_016069 | 16p13.3        |
| 210092_at   | 15 | MAGOH       | AF067173  | 1p34-p33       |
| 210093_s_at | 15 | MAGOH       | AF067173  | 1p34-p33       |
| 219362_at   | 13 | MAK10       | NM_024635 | ---            |
| 220925_at   | 14 | MAK10       | NM_021929 | 9q22.1         |
| 217745_s_at | 15 | MAK3        | NM_025146 | 3q13.31        |

|             |    |              |           |                |
|-------------|----|--------------|-----------|----------------|
| 204777_s_at | 14 | MAL          | NM_002371 | 2cen-q13       |
| 208309_s_at | 14 | MALT1        | NM_006785 | 18q21          |
| 210017_at   | 14 | MALT1        | AF070528  | 18q21          |
| 210018_x_at | 15 | MALT1        | AB026118  | 18q21          |
| 202360_at   | 15 | MAML1        | NM_014757 | 5q35           |
| 208116_s_at | 10 | MAN1A1       | NM_005907 | 6q22           |
| 221760_at   | 15 | MAN1A1       | BG287153  | 6q22           |
| 217921_at   | 13 | MAN1A2       | BE543064  | 1p13           |
| 217922_at   | 15 | MAN1A2       | BE543064  | 1p13           |
| 65884_at    | 15 | MAN1B1       | AA631254  | 9q34           |
| 214180_at   | 14 | MAN1C1       | AW340588  | 1p35           |
| 218918_at   | 15 | MAN1C1       | NM_020379 | 1p35           |
| 205105_at   | 13 | MAN2A1       | NM_002372 | 5q21-q22       |
| 202032_s_at | 15 | MAN2A2       | NM_006122 | 15q26.1        |
| 219999_at   | 15 | MAN2A2       | NM_018621 | 15q26.1        |
| 214703_s_at | 15 | MAN2B2       | AW954107  | 4p16.2         |
| 203668_at   | 15 | MAN2C1       | NM_006715 | 15q11-q13      |
| 209166_s_at | 15 | MANB; LAMAN  | U68567    | 19cen-q13.1    |
| 203778_at   | 15 | MANBA        | NM_005908 | 4q22-q25       |
| 220945_x_at | 14 | MANSC1       | NM_018050 | 12p13.2        |
| 212741_at   | 14 | MAOA         | AA923354  | Xp11.4-p11.3   |
| 204041_at   | 15 | MAOB         | NM_000898 | Xp11.23        |
| 212508_at   | 15 | MAP-1; PNMA4 | AK024029  | 14q32          |
| 208786_s_at | 15 | MAP1A/1BLC3  | AF183417  | 16q24.2        |
| 212233_at   | 15 | MAP1B        | AL523076  | 5q13           |
| 208785_s_at | 15 | MAP1LC3B     | BE893893  | ---            |
| 202670_at   | 15 | MAP2K1       | AI571419  | 15q22.1-q22.33 |
| 217971_at   | 15 | MAP2K1IP1    | NM_021970 | 4q23           |
| 202424_at   | 15 | MAP2K2       | NM_030662 | 7q32           |
| 207667_s_at | 12 | MAP2K3       | NM_002756 | 17q11.2        |
| 215498_s_at | 15 | MAP2K3       | AA780381  | 17q11.2        |
| 215499_at   | 14 | MAP2K3       | AA780381  | 17q11.2        |
| 203265_s_at | 11 | MAP2K4       | NM_003010 | 17p11.2        |
| 203266_s_at | 15 | MAP2K4       | NM_003010 | 17p11.2        |
| 203652_at   | 15 | MAP3K11      | NM_002419 | 11q13.1-q13.3  |
| 205448_s_at | 13 | MAP3K12      | NM_006301 | 12q13          |
| 203514_at   | 10 | MAP3K3       | BF971923  | 17q24.2        |
| 204089_x_at | 14 | MAP3K4       | NM_006724 | 6q25.3         |
| 216199_s_at | 13 | MAP3K4       | AL109942  | 6q25.3         |
| 203837_at   | 14 | MAP3K5       | NM_005923 | 6q22.33        |
| 206853_s_at | 14 | MAP3K7       | AL121964  | 6q16.1-q16.3   |
| 206854_s_at | 15 | MAP3K7       | NM_003188 | 6q16.1-q16.3   |
| 210284_s_at | 14 | MAP3K7IP2    | AB018276  | 6q25.1-q25.3   |
| 212184_s_at | 15 | MAP3K7IP2    | AL117407  | 6q25.1-q25.3   |
| 212566_at   | 15 | MAP4         | AL523310  | 3p21           |
| 212567_s_at | 15 | MAP4         | AL523310  | 3p21           |
| 243_g_at    | 15 | MAP4         | M64571    | 3p21           |
| 33850_at    | 15 | MAP4         | W28892    | 3p21           |
| 218311_at   | 15 | MAP4K3       | NM_003618 | 2p22.3         |
| 206571_s_at | 15 | MAP4K4       | NM_004834 | 2q11.2-q12     |

|             |    |           |           |               |
|-------------|----|-----------|-----------|---------------|
| 218181_s_at | 15 | MAP4K4    | AL561281  | 2q12.1        |
| 203552_at   | 15 | MAP4K5    | AW298170  | 14q11.2-q21   |
| 203553_s_at | 15 | MAP4K5    | NM_006575 | 14q11.2-q21   |
| 218291_at   | 15 | MAPBPIP   | NM_014017 | 1q22          |
| 208351_s_at | 14 | MAPK1     | NM_002745 | 22q11.2       |
| 212271_at   | 15 | MAPK1     | AA195999  | 22q11.2       |
| 206106_at   | 12 | MAPK12    | AL022328  | 22q13.33      |
| 210058_at   | 13 | MAPK13    | BC000433  | 6p21.31       |
| 202530_at   | 15 | MAPK14    | NM_001315 | 6p21.3-p21.2  |
| 211561_x_at | 14 | MAPK14    | L35253    | ---           |
| 207121_s_at | 15 | MAPK6     | NM_002748 | 15q21         |
| 213178_s_at | 15 | MAPK8IP3  | AB028989  | 16p13.3       |
| 203218_at   | 15 | MAPK9     | W37431    | 5q35          |
| 217808_s_at | 14 | MAPKAP1   | NM_024117 | 9q34.12       |
| 201460_at   | 15 | MAPKAPK2  | AI141802  | 1q32          |
| 201461_s_at | 14 | MAPKAPK2  | NM_004759 | 1q32          |
| 215050_x_at | 11 | MAPKAPK2  | BG325734  | 1q32          |
| 202787_s_at | 15 | MAPKAPK3  | NM_004635 | 3p21.3        |
| 202788_at   | 15 | MAPKAPK3  | NM_004635 | 3p21.3        |
| 212871_at   | 14 | MAPKAPK5  | NM_003668 | 12q24.13      |
| 200712_s_at | 15 | MAPRE1    | NM_012325 | 20q11.1-11.23 |
| 200713_s_at | 15 | MAPRE1    | NM_012325 | 20q11.1-11.23 |
| 202501_at   | 15 | MAPRE2    | NM_014268 | 18q12.2       |
| 213489_at   | 13 | MAPRE2    | BE671156  | 18q12.2       |
| 218582_at   | 15 | MARCH5    | NM_017824 | 10q23.33      |
| 201737_s_at | 15 | MARCH6    | NM_005885 | 5p15.2        |
| 202653_s_at | 15 | MARCH7    | BC003404  | 2q24.2        |
| 202654_x_at | 15 | MARCH7    | NM_022826 | 2q24.2        |
| 213256_at   | 15 | MARCH-III | AW593996  | 5q23.3        |
| 201736_s_at | 15 | MARCH-VI  | BF000409  | 5p15.2        |
| 212498_at   | 15 | MARCH-VI  | AF056433  | ---           |
| 201668_x_at | 14 | MARCKS    | AW163148  | 6q22.2        |
| 201669_s_at | 15 | MARCKS    | NM_002356 | 6q22.2        |
| 213002_at   | 15 | MARCKS    | AA770596  | 6q22.2        |
| 200644_at   | 15 | MARCKSL1  | NM_023009 | 1p34.3        |
| 221047_s_at | 15 | MARK1     | NM_018650 | 1q42.11       |
| 202568_s_at | 15 | MARK3     | AI745639  | 14q32.3       |
| 202569_s_at | 15 | MARK3     | NM_002376 | 14q32.3       |
| 55065_at    | 15 | MARK4     | AL120554  | 19q13.3       |
| 201475_x_at | 15 | MARS      | NM_004990 | 12q13.2       |
| 213671_s_at | 15 | MARS      | AA621558  | 12q13.2       |
| 217956_s_at | 15 | MASA      | NM_021204 | 4q21.3        |
| 218499_at   | 13 | MASK      | NM_016542 | Xq26.2        |
| 213749_at   | 15 | MASP1     | AV686235  | 3q27-q28      |
| 215903_s_at | 15 | MAST2     | BE786598  | 1p34.1        |
| 200768_s_at | 15 | MAT2A     | BC001686  | 2p11.2        |
| 213705_at   | 10 | MAT2A     | AW301861  | 2p11.2        |
| 217993_s_at | 15 | MAT2B     | NM_013283 | 5q34-q35.1    |
| 202350_s_at | 15 | MATN2     | NM_002380 | 8q22          |
| 200624_s_at | 15 | MATR3     | AA577695  | 5q31.3        |

|             |    |             |           |              |
|-------------|----|-------------|-----------|--------------|
| 200626_s_at | 15 | MATR3       | NM_018834 | 5q31.3       |
| 214363_s_at | 15 | MATR3       | AA129420  | 5q31.3       |
| 219543_at   | 12 | MAWBP       | NM_022129 | 10pter-q25.3 |
| 209331_s_at | 15 | MAX         | AA723514  | 14q23        |
| 209332_s_at | 15 | MAX         | AA723514  | 14q23        |
| 212064_x_at | 14 | MAZ         | AI471665  | 16p11.2      |
| 204179_at   | 15 | MB          | NM_005368 | 22q13.1      |
| 208858_s_at | 11 | MBC2        | BC004998  | 12q13.13     |
| 203353_s_at | 14 | MBD1        | NM_015846 | 18q21        |
| 202484_s_at | 15 | MBD2        | AF072242  | 18q21        |
| 41160_at    | 15 | MBD3        | AC005943  | 19p13.3      |
| 209579_s_at | 15 | MBD4        | AL556619  | 3q21-q22     |
| 209580_s_at | 15 | MBD4        | AL556619  | 3q21-q22     |
| 214047_s_at | 15 | MBD4        | AI913365  | 3q21-q22     |
| 214048_at   | 10 | MBD4        | AI913365  | 3q21-q22     |
| 220195_at   | 12 | MBD5        | NM_018328 | 2q23.3       |
| 209058_at   | 15 | MBF1        | AB002282  | 9q34.3       |
| 209059_s_at | 15 | MBF1        | AB002282  | 9q34.3       |
| 218411_s_at | 13 | MBIP        | NM_016586 | 14q13.2      |
| 201151_s_at | 13 | MBNL1       | BF512200  | 3q25         |
| 201152_s_at | 15 | MBNL1       | N31913    | 3q25         |
| 201153_s_at | 15 | MBNL1       | N31913    | 3q25         |
| 203640_at   | 15 | MBNL2       | BE328496  | 13q32.2      |
| 210136_at   | 13 | MBP         | AW070431  | 18q23        |
| 209356_x_at | 15 | MBP1        | AB030655  | 11q13        |
| 201620_at   | 15 | MBTPS1      | NM_003791 |              |
| 217543_s_at | 14 | MBTPS1      | BE890314  |              |
| 209408_at   | 15 | MCAK; KNXL6 | U63743    | 1p34.1       |
| 211519_s_at | 13 | MCAK; KNXL6 | AY026505  | 1p34.1       |
| 209086_x_at | 15 | MCAM        | BE964361  | 11q23.3      |
| 211042_x_at | 14 | MCAM        | BC006329  | ---          |
| 204656_at   | 11 | MCART1      | AL138752  | 9p12-p11     |
| 209366_x_at | 15 | MCB5        | M22865    | 18q23        |
| 206132_at   | 14 | MCC         | NM_002387 | 5q21-q22     |
| 218440_at   | 15 | MCCC1       | NM_020166 | 3q27         |
| 209623_at   | 15 | MCCC2       | AW439494  | 5q12-q13     |
| 35147_at    | 15 | MCF2L       | AB002360  | 13q34        |
| 212245_at   | 15 | MCFD2       | AL567779  | 2p21         |
| 212246_at   | 13 | MCFD2       | BE880828  | 2p21         |
| 205716_at   | 13 | MCFP        | NM_018843 | 7q21.13      |
| 210775_x_at | 13 | MCH6        | AB015653  | 1p36.3-p36.1 |
| 200797_s_at | 15 | MCL1        | AI275690  | 1q21         |
| 200798_x_at | 15 | MCL1        | NM_021960 | 1q21         |
| 214057_at   | 11 | MCL1        | H71805    | 1q21         |
| 217274_x_at | 15 | MCL1        | X52005    | ---          |
| 202107_s_at | 15 | MCM2        | NM_004526 | 3q21         |
| 201555_at   | 15 | MCM3        | NM_002388 | 6p12         |
| 212269_s_at | 15 | MCM3AP      | AJ010089  | 21q22.3      |
| 220459_at   | 14 | MCM3APAS    | NM_018118 | 21q22.3      |
| 222036_s_at | 15 | MCM4        | AI859865  | 8q11.2       |

|             |    |                 |           |                 |
|-------------|----|-----------------|-----------|-----------------|
| 222037_at   | 12 | MCM4            | AI859865  | 8q11.2          |
| 216237_s_at | 15 | MCM5            | AA807529  | 22q13.1         |
| 201930_at   | 15 | MCM6            | NM_005915 | 2q21            |
| 219952_s_at | 11 | MCOLN1          | NM_020533 | 19p13.3-p13.2   |
| 207549_x_at | 11 | MCP             | NM_002389 | 1q32            |
| 208783_s_at | 15 | MCP             | AL570661  | 1q32            |
| 216598_s_at | 10 | MCP-1           | S69738    | 17q11.2-q21.1   |
| 202556_s_at | 15 | MCRS1           | NM_006337 | 12q13.12        |
| 210807_s_at | 13 | MCT2            | AF049608  | 12q13           |
| 218163_at   | 15 | MCTS1           | NM_014060 | Xq22-q24        |
| 208825_x_at | 15 | MDA20; FLJ27455 | U43701    | 17q11           |
| 203062_s_at | 15 | MDC1            | NM_014641 | 6pter-p21.31    |
| 215543_s_at | 15 | MDC1D; KIAA0609 | BF057493  | 22q12.3         |
| 200978_at   | 15 | MDH1            | NM_005917 | 2p13.3          |
| 209036_s_at | 15 | MDH2            | BC001917  | 7p12.3-q11.2    |
| 213333_at   | 15 | MDH2            | AL520774  | 7p12.3-q11.2    |
| 213761_at   | 15 | MDM1            | AW664850  | 12q14.3         |
| 212693_at   | 15 | MDN1            | BE670928  | ---             |
| 209994_s_at | 15 | mdr1            | AF016535  | 7q21.1          |
| 210317_s_at | 15 | MDS             | U28936    | 17p13.3         |
| 210996_s_at | 15 | MDS             | U43430    | 17p13.3         |
| 218288_s_at | 15 | MDS025          | NM_021825 | 11q14.1         |
| 218597_s_at | 15 | MDS029          | NM_018464 | 10q21.3         |
| 219348_at   | 15 | MDS032          | NM_018467 | 19p13.12        |
| 221706_s_at | 15 | MDS032          | BC006005  | 19p13.12        |
| 214042_s_at | 15 | MDS1            | AW071997  | ---             |
| 221775_x_at | 15 | MDS1            | BG152979  | ---             |
| 204058_at   | 14 | ME1             | AL049699  | 6q12            |
| 204059_s_at | 15 | ME1             | NM_002395 | 6q12            |
| 209397_at   | 15 | ME2             | BC000147  | 6p25-p24        |
| 204663_at   | 15 | ME3             | NM_006680 | 11cen-q22.3     |
| 218061_at   | 15 | MEA1            | NM_014623 | 6p21.3-p21.1    |
| 203506_s_at | 12 | MED12           | NM_005120 | Xq13            |
| 212208_at   | 15 | MED13L          | AK023837  | 12q24.22        |
| 218438_s_at | 15 | MED28           | NM_025205 | 4p16            |
| 217843_s_at | 15 | MED4            | NM_014166 | 13q14.12        |
| 207079_s_at | 12 | MED6            | NM_005466 | 14q24.1         |
| 210104_at   | 13 | MED6            | AF074723  | 14q24.1         |
| 213127_s_at | 15 | MED8            | BG230758  | 1p34.1          |
| 218372_at   | 15 | MED9            | NM_018019 | 17p11.2         |
| 31845_at    | 14 | MEF             | U32645    | Xq26            |
| 208328_s_at | 15 | MEF2A           | NM_005587 | 15q26           |
| 212535_at   | 15 | MEF2A           | AA142929  | 15q26           |
| 209199_s_at | 15 | MEF2C           | L08895    | 5q14            |
| 209200_at   | 15 | MEF2C           | AL536517  | 5q14            |
| 203003_at   | 15 | MEF2D           | AL530331  | 1q12-q23        |
| 211678_s_at | 15 | MEG3            | AF090934  | 14q32 /// 14q32 |
| 203812_at   | 13 | MEGF5           | AB011538  | 5q35            |
| 203813_s_at | 13 | MEGF5           | AB011538  | 5q35            |
| 214778_at   | 11 | MEGF8           | AB011541  | 19q12           |

|             |    |                      |           |                     |
|-------------|----|----------------------|-----------|---------------------|
| 204069_at   | 15 | MEIS1                | NM_002398 | 2p14-p13            |
| 207480_s_at | 15 | MEIS2                | NM_020149 | 15q13.3             |
| 214077_x_at | 15 | MEIS4                | H15129    | 17p11.2             |
| 221695_s_at | 12 | MEKK2; MEKK2B        | AF239798  | 2q21.1              |
| 204825_at   | 15 | MELK                 | NM_014791 | 9p13.1              |
| 202645_s_at | 15 | MEN1                 | NM_000244 | 11q13               |
| 205619_s_at | 15 | MEOX1                | NM_004527 | 17q21               |
| 206201_s_at | 15 | MEOX2                | NM_005924 | 7p22.1-p21.3        |
| 206028_s_at | 14 | MERTK                | NM_006343 | 2q14.1              |
| 202016_at   | 15 | MEST                 | NM_002402 | 7q32                |
| 212673_at   | 15 | METAP1               | D42084    | 4q23                |
| 219051_x_at | 14 | METRN                | NM_024042 | 16p13.3             |
| 209265_s_at | 15 | METTL3               | BC001650  | 14q11.1             |
| 219698_s_at | 14 | METTL4               | NM_022840 | 18p11.31            |
| 203406_at   | 15 | MFAP1                | NM_005926 | 15q15-q21           |
| 203417_at   | 15 | MFAP2                | NM_017459 | 1p36.1-p35          |
| 213123_at   | 15 | MFAP3                | BE222709  | 5q32-q33.2          |
| 212713_at   | 14 | MFAP4                | R72286    | 17p11.2             |
| 213764_s_at | 15 | MFAP5                | AW665892  | 12p13.1-p12.3       |
| 213765_at   | 15 | MFAP5                | AW665892  | 12p13.1-p12.3       |
| 210605_s_at | 15 | MFGE8                | BC003610  | 15q25               |
| 213457_at   | 13 | MFHAS1               | BF739959  | 8p23.1              |
| 207098_s_at | 15 | MFN1                 | NM_017927 | 3q27.1              |
| 217043_s_at | 15 | MFN1                 | U95822    | 3q27.1              |
| 201155_s_at | 15 | MFN2                 | NM_014874 | 1p36.21             |
| 204153_s_at | 13 | MFNG                 | AI738965  | 22q12               |
| 218109_s_at | 15 | MFSD1                | NM_022736 | 3q25.32             |
| 222138_s_at | 15 | MG21; FLJ20563       | AF158978  | Xp11.23 /// Xp11.23 |
| 212945_s_at | 14 | MGA                  | BE502432  | 15q15               |
| 201126_s_at | 15 | MGAT1                | NM_002406 | 5q35                |
| 203102_s_at | 15 | MGAT2                | NM_002408 | 14q21               |
| 211061_s_at | 14 | MGAT2                | BC006390  | 14q21 /// 14q21     |
| 220189_s_at | 15 | MGAT4B               | NM_014275 | 5q35                |
| 215528_at   | 14 | MGAT5                | AL049390  | ---                 |
| 205740_s_at | 15 | MGC10433             | NM_024321 | 19q13.13            |
| 208094_s_at | 14 | MGC10471             | NM_030818 | 19p13.13            |
| 217047_s_at | 15 | MGC105131            | AK027138  | 4q22.1              |
| 212068_s_at | 12 | MGC10526             | AB011087  | 9q34.3              |
| 218897_at   | 13 | MGC10993             | NM_030577 | 2q14.2              |
| 209029_at   | 15 | MGC110877            | AF193844  | 12p13.31            |
| 212861_at   | 14 | MGC11308             | BF690150  | 12q13.13            |
| 221912_s_at | 15 | MGC1203              | AL049795  | 1p36.11-p34.2       |
| 202783_at   | 15 | MGC126502; MGC126503 | U40490    | 5p13.1-5cen         |
| 202784_s_at | 15 | MGC126502; MGC126503 | U40490    | 5p13.1-5cen         |
| 211038_s_at | 15 | MGC12760             | BC006312  | 1p36.13             |
| 221864_at   | 15 | MGC13024             | AW517464  | 16p11.2             |
| 57516_at    | 12 | MGC13138             | AA746290  | 16p11.2             |
| 214696_at   | 12 | MGC14376             | AF070569  | 17p13.3             |
| 212890_at   | 11 | MGC15523             | BF663461  | 17q25.3             |
| 203173_s_at | 15 | MGC16824             | NM_020314 | 16p13.11            |



|             |    |                      |           |              |
|-------------|----|----------------------|-----------|--------------|
| 211159_s_at | 14 | MGC2134; MGC8949     | AB000635  | 6p21.1       |
| 212340_at   | 15 | MGC21416             | BE673723  | Xq12         |
| 212341_at   | 15 | MGC21416             | AA195936  | Xq12         |
| 212342_at   | 13 | MGC21416             | BG500611  | Xq12         |
| 209391_at   | 12 | MGC21559; MGC111193  | AF061729  | 9q34.13      |
| 214061_at   | 14 | MGC21654             | AI017564  | 8q24.13      |
| 221904_at   | 15 | MGC21688             | AI141670  | 3q27.3       |
| 209328_x_at | 11 | MGC2198              | BC000587  | 5q35.3       |
| 209329_x_at | 15 | MGC2198              | BC000587  | 5q35.3       |
| 213065_at   | 15 | MGC23401             | AB011118  | 12q15        |
| 208653_s_at | 14 | MGC-24               | AF299343  | 6q21         |
| 208654_s_at | 15 | MGC-24               | AF299343  | 6q21         |
| 213104_at   | 15 | MGC24381             | AI799802  | 16p13.3      |
| 221637_s_at | 14 | MGC2477              | BC001434  | 11q12.3      |
| 203119_at   | 13 | MGC2574              | NM_024098 | 11q12.2      |
| 213610_s_at | 15 | MGC2610              | BE326381  | 2q31.1       |
| 209566_at   | 15 | MGC26273             | AL080184  | 2q14.2       |
| 218945_at   | 15 | MGC2654              | NM_024109 | 16p13.2      |
| 218903_s_at | 15 | MGC2731              | NM_024068 | 12q13.13     |
| 222064_s_at | 15 | MGC2744              | AI093187  | 17q21.31     |
| 219097_x_at | 15 | MGC2747              | NM_024104 | 19p13.12     |
| 221988_at   | 15 | MGC2747              | AA463853  | ---          |
| 200076_s_at | 15 | MGC2749              | BC006479  | 19p13.11     |
| 218641_at   | 15 | MGC3032              | NM_023941 | 11q13        |
| 215380_s_at | 15 | MGC3077; FLJ11717    | AK021779  | 7p15-p14     |
| 218714_at   | 12 | MGC3121              | NM_024031 | 16p11.2      |
| 45687_at    | 15 | MGC3121              | AA161130  | 16p11.2      |
| 218419_s_at | 15 | MGC3123              | NM_024107 | 17q21.31     |
| 220934_s_at | 15 | MGC3196              | NM_024084 | ---          |
| 220305_at   | 12 | MGC3260              | NM_024030 | 20p13        |
| 218953_s_at | 15 | MGC3265              | NM_024028 | 5q33.1       |
| 213644_at   | 15 | MGC33887             | AI979276  | 17q24.2      |
| 213392_at   | 15 | MGC35048             | AW070229  | 16p13.11     |
| 219324_at   | 13 | MGC3731              | NM_024313 | 22q13.1      |
| 212178_s_at | 15 | MGC3792              | AK022555  | 7q11.23      |
| 214773_x_at | 15 | MGC3794              | AI983505  | 1q23.2       |
| 221959_at   | 15 | MGC39325             | BE672313  | 8q12.1       |
| 216126_at   | 13 | MGC39821             | AK022418  | 19p13.11     |
| 214051_at   | 15 | MGC39900             | BF677486  | Xq22.2       |
| 218756_s_at | 12 | MGC4172              | NM_024308 | 17q21.1      |
| 220352_x_at | 13 | MGC4278              | NM_024305 | ---          |
| 218130_at   | 12 | MGC4368              | NM_024510 | 17q25.3      |
| 210933_s_at | 10 | MGC4655              | BC004908  | 16q22.1      |
| 203257_s_at | 14 | MGC4707              | NM_024113 | 11p11.2      |
| 221620_s_at | 15 | MGC4825              | AF061264  | Xp22.13      |
| 221548_s_at | 15 | MGC4846              | AY024365  | 2q37.3       |
| 211416_x_at | 11 | MGC50550; dJ831C21.2 | L20492    | 20p11.1      |
| 202365_at   | 15 | MGC5139              | BC004815  | 12q24.31     |
| 220949_s_at | 15 | MGC5242              | NM_024033 | 7q33         |
| 219200_at   | 13 | MGC5297              | NM_024091 | 5p15.3-p15.2 |

|             |    |          |           |                   |
|-------------|----|----------|-----------|-------------------|
| 211986_at   | 15 | MGC5395  | BG287862  | 11q12.2           |
| 221477_s_at | 15 | MGC5618  | BC001980  | 6q25.3            |
| 211996_s_at | 15 | MGC70907 | BG256504  | 16p12.3           |
| 211685_s_at | 15 | MGC74858 | AF251061  | 8q22-q23          |
| 214023_x_at | 14 | MGC8685  | AL533838  | 6p25              |
| 221593_s_at | 15 | MGC88191 | BC001663  | 2q12.1            |
| 215084_s_at | 12 | MGC8974  | AL031427  | 1p33-p32.1        |
| 62212_at    | 15 | MGC955   | W37846    | 1p34.1            |
| 40225_at    | 15 | MGC99654 | D88435    | 4p16              |
| 200898_s_at | 14 | MGEA5    | AK002091  | 10q24.1-q24.3     |
| 200899_s_at | 15 | MGEA5    | AK002091  | 10q24.1-q24.3     |
| 211026_s_at | 15 | MGLL     | BC006230  | 3q21.3 /// 3q21.3 |
| 204880_at   | 15 | MGMT     | NM_002412 | 10q26             |
| 202291_s_at | 15 | MGP      | NM_000900 | 12p13.1-p12.3     |
| 212576_at   | 15 | MGRN1    | AB011116  | 16p13.3           |
| 204168_at   | 15 | MGST2    | NM_002413 | 4q28.3            |
| 201403_s_at | 15 | MGST3    | NM_004528 | 1q23              |
| 205904_at   | 14 | MICA     | NM_000247 | 6p21.3            |
| 205905_s_at | 11 | MICA     | NM_000247 | 6p21.3            |
| 206275_s_at | 14 | MICAL2   | NM_014632 | 11p15.3           |
| 212472_at   | 15 | MICAL2   | BE965029  | 11p15.3           |
| 212473_s_at | 15 | MICAL2   | BE965029  | 11p15.3           |
| 55081_at    | 14 | MICAL-L1 | W46406    | 22q13.1-q13.2     |
| 203636_at   | 15 | MID1     | BE967532  | Xp22              |
| 203637_s_at | 15 | MID1     | NM_000381 | Xp22              |
| 210694_s_at | 14 | MID1     | AF041209  | Xp22              |
| 218251_at   | 15 | MID1IP1  | NM_021242 | Xp11.4            |
| 208384_s_at | 13 | MID2     | NM_012216 | Xq22              |
| 214846_s_at | 15 | MIDORI   | AB037751  | 15q25.2           |
| 217871_s_at | 15 | MIF      | BC000447  | 22q11.23          |
| 211558_s_at | 15 | MIG13    | U26266    | 19p13.2-p13.1     |
| 209210_s_at | 15 | MIG2     | Z24725    | 14q22.1           |
| 200984_s_at | 15 | MIN1     | X16447    | 11p13             |
| 213188_s_at | 14 | MINA53   | AI823896  | 3q12.1-q12.2      |
| 214030_at   | 15 | MINA53   | BE501352  | 3q12.1-q12.2      |
| 209959_at   | 10 | MINOR    | U12767    | 9q22              |
| 209226_s_at | 15 | MIP      | U72069    | 5q13.2            |
| 209751_s_at | 15 | MIP-2A   | AF291676  | 19q13.43          |
| 36830_at    | 13 | MIPEP    | U80034    | 13q12             |
| 209585_s_at | 15 | MIPP     | AF084943  | 10q23             |
| 221824_s_at | 15 | MIR      | AA770170  | 10q11.22          |
| 202593_s_at | 15 | MIR16    | NM_016641 | 16p12-p11.2       |
| 221559_s_at | 14 | MIS12    | BC000229  | 17p13.3           |
| 212499_s_at | 15 | MISS     | AK025580  | 14q22.2           |
| 207233_s_at | 14 | MITF     | NM_000248 | 3p14.2-p14.1      |
| 37433_at    | 11 | MIZ1     | AF077954  | 18q21.1           |
| 212020_s_at | 12 | MKI67    | AU152107  | 10q25-qter        |
| 205698_s_at | 15 | MKK6     | U39657    | 17q25.1           |
| 218138_at   | 15 | MKKS     | NM_018848 | 20p12             |
| 212748_at   | 15 | MKL1     | AB037859  | 22q13             |

|             |    |             |           |                   |
|-------------|----|-------------|-----------|-------------------|
| 218259_at   | 15 | MKL2        | NM_014048 | 16p13.13          |
| 209467_s_at | 15 | MKNK1       | BC002755  | 1p34.1            |
| 218205_s_at | 15 | MKNK2       | NM_017572 | 19p13.3           |
| 215501_s_at | 12 | MKP5; MKP-5 | AK022513  | 1q41              |
| 201285_at   | 15 | MKRN1       | NM_013446 | 7q34              |
| 218071_s_at | 14 | MKRN2       | NM_014160 | 3p25              |
| 208082_x_at | 15 | MKRN4       | NM_030757 | Xp21.1 /// Xp21.1 |
| 204173_at   | 15 | MLC1SA      | NM_002475 | 12q13.13          |
| 209742_s_at | 15 | MLC2; CMH10 | AF020768  | 12q23-q24.3       |
| 204783_at   | 15 | MLF1        | AI911434  | 3q25.1            |
| 204784_s_at | 15 | MLF1        | NM_022443 | 3q25.1            |
| 218883_s_at | 15 | MLF1IP      | NM_024629 | 4q35.1            |
| 200948_at   | 15 | MLF2        | NM_005439 | 12p13             |
| 202520_s_at | 15 | MLH1        | NM_000249 | 3p21.3            |
| 204838_s_at | 15 | MLH3        | NM_014381 | 14q24.3           |
| 214525_x_at | 10 | MLH3        | AB039667  | 14q24.3           |
| 217216_x_at | 11 | MLH3        | AC006530  | ---               |
| 212076_at   | 12 | MLL         | AA715041  | 11q23             |
| 203419_at   | 13 | MLL4        | NM_014727 | 19q13.1           |
| 205408_at   | 14 | MLLT10      | NM_004641 | 10p12             |
| 204917_s_at | 14 | MLLT3       | AV756536  | 9p22              |
| 204918_s_at | 13 | MLLT3       | AV756536  | 9p22              |
| 218211_s_at | 14 | MLPH        | NM_024101 | 2q37.3            |
| 220615_s_at | 10 | MLSTD1      | NM_018099 | 12p11.23          |
| 202519_at   | 13 | MLXIP       | NM_014938 | 12q21.31          |
| 218869_at   | 15 | MLYCD       | NM_012213 | 16q23.3           |
| 210908_s_at | 15 | mm-1        | AB055804  | 12q12             |
| 217492_s_at | 15 | MMAC1       | AF023139  | 9p21              |
| 203414_at   | 15 | MMD         | NM_012329 | 17q               |
| 209700_x_at | 15 | MMGL        | AB042555  | 1q12              |
| 210305_at   | 15 | MMGL        | AB042557  | 1q12              |
| 203365_s_at | 14 | MMP15       | NM_002428 | 16q13-q21         |
| 201069_at   | 15 | MMP2        | NM_004530 | 16q13-q21         |
| 207118_s_at | 13 | MMP23A      | NM_004659 | 1p36.3            |
| 203936_s_at | 15 | MMP9        | NM_004994 | 20q11.2-q13.1     |
| 160020_at   | 15 | MMP-X1      | Z48481    | 14q11-q12         |
| 207012_at   | 10 | MMP-X2      | AB009303  | 8q21              |
| 205612_at   | 11 | MMRN1       | NM_007351 | 4q22              |
| 219091_s_at | 15 | MMRN2       | NM_024756 | 10q23.31          |
| 202167_s_at | 15 | MMS19L      | NM_022362 | 10q24-q25         |
| 209096_at   | 15 | MMS2        | U62136    | 8q11.21           |
| 205330_at   | 13 | MN1         | NM_002430 | 22q11             |
| 217317_s_at | 15 | MN7         | AB002391  | 15q11-q13         |
| 220201_at   | 14 | MNAB        | NM_018835 | 9q34              |
| 220202_s_at | 15 | MNAB        | NM_018835 | 9q34              |
| 219703_at   | 15 | MNS1        | NM_018365 | 15q21.2           |
| 204206_at   | 15 | MNT         | NM_020310 | 17p13.3           |
| 201297_s_at | 13 | MOB1        | AK023321  | 2p13.1            |
| 201298_s_at | 15 | MOBK1B      | BC003398  | 2p13.1            |
| 218212_s_at | 15 | MOCS2       | NM_004531 | 5q11              |

|             |    |                     |           |               |
|-------------|----|---------------------|-----------|---------------|
| 221820_s_at | 15 | MOF; hMOF; FLJ14040 | AK024102  | 16p11.2       |
| 214650_x_at | 11 | MOG                 | AL050328  | 6p22-p21.3    |
| 203956_at   | 15 | MORC2               | NM_014941 | 22q12.2       |
| 219038_at   | 15 | MORC4               | NM_024657 | Xq22.3        |
| 221381_s_at | 15 | MORF4               | NM_006792 | 4q33-q34.1    |
| 217982_s_at | 15 | MORF4L1             | NM_006791 | 15q24         |
| 201994_at   | 15 | MORF4L2             | NM_012286 | Xq22          |
| 219527_at   | 15 | MOSC2               | NM_017898 | 1q42.11       |
| 218853_s_at | 15 | MOSPD1              | NM_019556 | Xq26.3        |
| 64883_at    | 15 | MOSPD2              | AI744083  | Xp22.31       |
| 219070_s_at | 14 | MOSPD3              | NM_023948 | 7q22          |
| 209708_at   | 15 | MOX                 | AY007239  | 6q23.1-23.3   |
| 209758_s_at | 15 | MP25; MAGP2         | U37283    | 12p13.1-p12.3 |
| 210532_s_at | 15 | MP68; PLPM          | AF116639  | 14q32.33      |
| 209149_s_at | 13 | MP70; HMP70         | U94831    | 14q11.2       |
| 209150_s_at | 15 | MP70; HMP70         | U94831    | 14q11.2       |
| 205079_s_at | 15 | MPDZ                | NM_003829 | 9p24-p22      |
| 213306_at   | 15 | MPDZ                | AA917899  | 9p24-p22      |
| 212611_at   | 15 | MPEG1               | AV728526  | 11q12.2       |
| 203686_at   | 15 | MPG                 | NM_002434 | 16p13.3       |
| 205235_s_at | 12 | MPHOSPH1            | NM_016195 | 10q23.32      |
| 212885_at   | 15 | MPHOSPH10           | AL545921  | 2p13.2        |
| 203740_at   | 14 | MPHOSPH6            | NM_005792 | 16q23.3       |
| 221965_at   | 14 | MPHOSPH9            | AI990326  | 12q24.31      |
| 203949_at   | 11 | MPO                 | NM_000250 | 17q23.1       |
| 202974_at   | 15 | MPP1                | NM_002436 | Xq28          |
| 207984_s_at | 12 | MPP2                | NM_005374 | 17q12-q21     |
| 213270_at   | 11 | MPP2                | AW450911  | 17q12-q21     |
| 206186_at   | 14 | MPP3                | NM_001932 | 17q12-q21     |
| 219321_at   | 15 | MPP5                | NM_022474 | 14q24.1       |
| 205413_at   | 15 | MPPED2              | NM_001584 | 11p13         |
| 203524_s_at | 15 | MPST                | NM_021126 | 22q13.1       |
| 203466_at   | 14 | MPV17               | NM_002437 | 2p23-p21      |
| 201874_at   | 15 | MPZL1               | BF978611  | 1q23.3        |
| 201875_s_at | 15 | MPZL1               | NM_024569 | 1q23.3        |
| 206538_at   | 15 | MRAS                | NM_012219 | 3q22.3        |
| 209583_s_at | 15 | MRC                 | AF063591  | 3q12-q13      |
| 204438_at   | 14 | MRC1                | NM_002438 | 10p13         |
| 37408_at    | 15 | MRC2                | AB014609  | 17q24.1       |
| 201318_s_at | 15 | MRCL3               | NM_006471 | 18p11.31      |
| 201319_at   | 15 | MRCL3               | NM_006471 | 18p11.31      |
| 208896_at   | 15 | MrDb; FLJ33908      | X98743    | 2q14.2        |
| 213138_at   | 11 | MRF-1               | M62324    | 2q11.2        |
| 209357_at   | 15 | MRG1                | AF109161  | 6q23.3        |
| 212197_x_at | 15 | M-RIP               | AB020671  | 17p11.2       |
| 214771_x_at | 15 | M-RIP               | AK025604  | 17p11.2       |
| 221474_at   | 15 | MRLC2; MLC-B        | U26162    | 18p11.31      |
| 209380_s_at | 15 | MRP5                | AF146074  | 3q27          |
| 204386_s_at | 15 | MRP63               | NM_024026 | ---           |
| 204387_x_at | 15 | MRP63               | NM_024026 | ---           |

|             |    |         |           |                     |
|-------------|----|---------|-----------|---------------------|
| 221995_s_at | 13 | MRP63   | BF195165  | ---                 |
| 219162_s_at | 15 | MRPL11  | NM_016050 | 11q13.3             |
| 203931_s_at | 15 | MRPL12  | NM_002949 | 17q25               |
| 218049_s_at | 15 | MRPL13  | NM_014078 | 8q22.1-q22.3        |
| 218027_at   | 15 | MRPL15  | NM_014175 | 8q11.2-q13          |
| 217980_s_at | 15 | MRPL16  | NM_017840 | ---                 |
| 217907_at   | 15 | MRPL18  | NM_014161 | 6q25.3              |
| 203465_at   | 15 | MRPL19  | NM_014763 | 2q11.1-q11.2        |
| 218887_at   | 15 | MRPL2   | NM_015950 | 6p21.3              |
| 220526_s_at | 15 | MRPL20  | NM_017971 | 1p36.3-p36.2        |
| 218339_at   | 15 | MRPL22  | NM_014180 | 5q33.1-q33.3        |
| 213897_s_at | 15 | MRPL23  | AI832239  | 11p15.5-p15.4       |
| 218270_at   | 10 | MRPL24  | NM_024540 | 1q21-q22            |
| 204599_s_at | 15 | MRPL28  | NM_006428 | 16p13.3             |
| 208787_at   | 15 | MRPL3   | BC003375  | 3q21-q23            |
| 203781_at   | 15 | MRPL33  | NM_004891 | 2p21                |
| 221692_s_at | 15 | MRPL34  | AB049652  | 19p13.1 /// 19p13.1 |
| 218890_x_at | 15 | MRPL35  | NM_016622 | 2p11.2              |
| 218558_s_at | 15 | MRPL39  | NM_017446 | 21q21.3             |
| 218105_s_at | 11 | MRPL4   | NM_015956 | ---                 |
| 203152_at   | 15 | MRPL40  | NM_003776 | 22q11.21            |
| 217919_s_at | 15 | MRPL42  | AL136659  | 12q22               |
| 218202_x_at | 15 | MRPL44  | NM_022915 | 2q36.3              |
| 219244_s_at | 15 | MRPL46  | NM_022163 | 15q24-q25           |
| 218281_at   | 15 | MRPL48  | NM_016055 | 11q13.3             |
| 201717_at   | 15 | MRPL49  | NM_004927 | 11q13               |
| 209609_s_at | 15 | MRPL9   | BC004517  | ---                 |
| 211594_s_at | 15 | MRPL9   | AB049636  | --- /// ---         |
| 218106_s_at | 15 | MRPS10  | NM_018141 | 6p21.1-p12.1        |
| 211595_s_at | 15 | MRPS11  | AB049944  | 15q25 /// 15q25     |
| 204331_s_at | 15 | MRPS12  | AA587905  | 19q13.1-q13.2       |
| 203800_s_at | 15 | MRPS14  | BG254653  | 1q23-1q25           |
| 203801_at   | 15 | MRPS14  | BG254653  | 1q24-q25            |
| 221437_s_at | 15 | MRPS15  | NM_031280 | 1p35-p34.1          |
| 213092_x_at | 13 | MRPS16  | AW241779  | 10q22.2             |
| 218982_s_at | 15 | MRPS17  | NM_015969 | 7p11                |
| 218385_at   | 15 | MRPS18A | NM_018135 | 6p21.3              |
| 221693_s_at | 15 | MRPS18a | AB049952  | 6p21.3 /// 6p21.3   |
| 208907_s_at | 14 | MRPS18B | BC005373  | 6p21.3              |
| 217408_at   | 15 | MRPS18B | AL050361  | 6p21.3              |
| 218001_at   | 15 | MRPS2   | NM_016034 | 9q34                |
| 219220_x_at | 15 | MRPS22  | NM_020191 | 3q23                |
| 219819_s_at | 15 | MRPS28  | NM_014018 | 8q21.1-q21.2        |
| 218398_at   | 15 | MRPS30  | NM_016640 | 5q11                |
| 222275_at   | 15 | MRPS30  | AI039469  | 5q11                |
| 212603_at   | 15 | MRPS31  | NM_005830 | 13q13.3             |
| 212604_at   | 15 | MRPS31  | AI937794  | 13q13.3             |
| 218654_s_at | 15 | MRPS33  | NM_016071 | 7q32-q34            |
| 218112_at   | 14 | MRPS34  | NM_023936 | 16p13.3             |
| 217942_at   | 15 | MRPS35  | NM_021821 | 12p11               |

|             |    |                   |           |                 |
|-------------|----|-------------------|-----------|-----------------|
| 212944_at   | 15 | MRPS6             | AK024896  | 21q21.3-q22.1   |
| 213164_at   | 15 | MRPS6             | AI867198  | 21q21.3-q22.1   |
| 217932_at   | 15 | MRPS7             | NM_015971 | 17q25           |
| 218536_at   | 15 | MRS2L             | AF052167  | 6p22.3-p22.1    |
| 218538_s_at | 14 | MRS2L             | AF052167  | 6p22.3-p22.1    |
| 219607_s_at | 13 | MS4A4A            | NM_024021 | 11q12           |
| 211364_at   | 11 | MSAP; c86fus      | AF109294  | 9p21            |
| 218136_s_at | 15 | MSCP              | NM_018579 | 8p21.2          |
| 221920_s_at | 15 | MSCP              | BE677761  | 8p21.2          |
| 41220_at    | 15 | MSF               | AB023208  | 17q25           |
| 208657_s_at | 12 | MSF               | AF142408  | 17q25           |
| 205887_x_at | 13 | MSH3              | NM_002439 | 5q11-q12        |
| 210947_s_at | 11 | MSH3              | J04810    | 5q11-q12        |
| 202911_at   | 15 | MSH6              | NM_000179 | 2p16            |
| 204633_s_at | 12 | MSK1              | AF074393  | 14q31-q32.1     |
| 207551_s_at | 15 | MSL3L1            | NM_006800 | Xp22.3          |
| 200600_at   | 15 | MSN               | NM_002444 | Xq11.2-q12      |
| 219281_at   | 15 | MSRA              | NM_012331 | 8p23.1          |
| 218773_s_at | 15 | MSRB2             | NM_012228 | 10p12           |
| 219451_at   | 12 | MSRB2             | NM_016064 | 10p12           |
| 209741_x_at | 15 | MSTP063; KIAA1454 | AF119814  | 15q24           |
| 216399_s_at | 15 | MSTP063; KIAA1454 | AK025663  | 15q24           |
| 205932_s_at | 14 | MSX1              | NM_002448 | 4p16.3-p16.1    |
| 213132_s_at | 13 | MT                | AL022237  | 22q13.31        |
| 212859_x_at | 15 | MT1E              | BF217861  | 16q13           |
| 216336_x_at | 15 | MT1E              | AL031602  | ---             |
| 210524_x_at | 13 | MT1F              | AF078844  | 16q13           |
| 213629_x_at | 15 | MT1F              | BF246115  | 16q13           |
| 217165_x_at | 13 | MT1F              | M10943    | ---             |
| 204745_x_at | 15 | MT1G              | NM_005950 | 16q13           |
| 211456_x_at | 15 | MT1H              | AF333388  | ---             |
| 204326_x_at | 15 | MT1X              | NM_002450 | 16q13 /// 16q13 |
| 208581_x_at | 15 | MT1X              | NM_005952 | 16q13           |
| 212185_x_at | 15 | MT2A              | NM_005953 | 16q13           |
| 202247_s_at | 14 | MTA1              | NM_004689 | 14q32.3         |
| 211783_s_at | 15 | MTA1              | BC006177  | 14q32.3         |
| 217761_at   | 15 | MTCBP-1           | NM_018269 | 2p25.3          |
| 217772_s_at | 15 | MTCH2             | NM_014342 | 11p11.2         |
| 210212_x_at | 15 | MTCP1             | BC002600  | Xq28            |
| 216862_s_at | 15 | MTCP1             | Z24459    | ---             |
| 219363_s_at | 15 | MTERFD1           | NM_015942 | 8q22.1          |
| 205323_s_at | 11 | MTF1              | NM_005955 | 1p33            |
| 202309_at   | 14 | MTHFD1            | NM_005956 | 14q24           |
| 201761_at   | 15 | MTHFD2            | NM_006636 | 2p13.1          |
| 220346_at   | 15 | MTHFD2L           | NM_025001 | 4q21.21         |
| 203433_at   | 15 | MTHFS             | NM_006441 | 15q24.3         |
| 203095_at   | 15 | MTIF2             | NM_002453 | 2p14-p16        |
| 213511_s_at | 15 | MTMR1             | AI167164  | Xq28            |
| 216095_x_at | 15 | MTMR1             | AF057354  | Xq28            |
| 205076_s_at | 10 | MTMR11            | NM_006697 | 1q12-q21        |

|             |    |        |           |                     |
|-------------|----|--------|-----------|---------------------|
| 203211_s_at | 15 | MTMR2  | NM_016156 | 11q22               |
| 202197_at   | 15 | MTMR3  | NM_021090 | 22q12.2             |
| 212277_at   | 14 | MTMR4  | AB014547  | 17q22-q23           |
| 214268_s_at | 15 | MTMR4  | AL042220  | 17q22-q23           |
| 214429_at   | 15 | MTMR6  | U47635    | 13q12               |
| 204837_at   | 15 | MTMR9  | AL080178  | 8p23-p22            |
| 213278_at   | 15 | MTMR9  | AW014788  | 8p23-p22            |
| 218716_x_at | 15 | MTO1   | NM_012123 | 6q14.1              |
| 222014_x_at | 15 | MTO1   | AI249752  | 6q14.1              |
| 203774_at   | 15 | MTR    | NM_000254 | 1q43                |
| 203200_s_at | 15 | MTRR   | N29717    | 5p15.3-p15.2        |
| 212096_s_at | 15 | MTSG1  | AL096842  | 8p22                |
| 203037_s_at | 15 | MTSS1  | NM_014751 | 8p22                |
| 212093_s_at | 15 | MTUS1  | AI695017  | 8p22                |
| 212095_s_at | 13 | MTUS1  | BE552421  | 8p22                |
| 212484_at   | 10 | MTVR1  | BF974389  | 11q23               |
| 32209_at    | 15 | MTVR1  | AF052151  | 11q23               |
| 210386_s_at | 15 | MTX1   | BC001906  | 1q21                |
| 203517_at   | 15 | MTX2   | NM_006554 | 2q31.2              |
| 215333_x_at | 15 | MU     | X08020    | 1p13.3              |
| 217117_x_at | 12 | MUC3   | AF007194  | 7q22                |
| 213009_s_at | 15 | MUL    | AK022701  | 17q22-q23           |
| 218568_at   | 15 | MULK   | NM_018238 | 7q34                |
| 221290_s_at | 12 | MUM1   | NM_016473 | 19p13.3             |
| 218463_s_at | 15 | MUS81  | NM_025128 | 11q13               |
| 202959_at   | 15 | MUT    | AI433712  | 6p21                |
| 202960_s_at | 15 | MUT    | NM_000255 | 6p21                |
| 207727_s_at | 15 | MUTYH  | NM_012222 | 1p34.3-p32.1        |
| 202086_at   | 12 | MX1    | NM_002462 | 21q22.3             |
| 204994_at   | 15 | MX2    | NM_002463 | 21q22.3             |
| 210778_s_at | 10 | MXD4   | BC002713  | 4p16.3              |
| 202364_at   | 15 | MXI1   | NM_005962 | 10q24-q25           |
| 213422_s_at | 15 | MXRA8  | AW888223  | 1p36.33             |
| 221498_at   | 15 | MY014  | AF060509  | 1q21.3              |
| 209836_x_at | 15 | My016  | AF060511  | 16p12.1             |
| 212781_at   | 13 | MY038  | AK026954  | 16p12.2             |
| 212783_at   | 15 | MY038  | AK026954  | 16p12.2             |
| 213906_at   | 15 | MYBL1  | AW592266  | 8q22                |
| 208040_s_at | 15 | MYBPC3 | NM_000256 | 11p11.2 /// 11p11.2 |
| 203359_s_at | 15 | MYCBP  | NM_012333 | 1p33-p32.2          |
| 201960_s_at | 15 | MYCBP2 | NM_015057 | 13q22               |
| 209757_s_at | 15 | MYCN   | BC002712  | 2p24.1              |
| 220471_s_at | 12 | MYCT1  | NM_025107 | 6q25.1              |
| 209124_at   | 15 | MYD88  | U70451    | 3p22                |
| 201497_x_at | 10 | MYH11  | NM_022844 | 16p13.13-p13.12     |
| 215795_at   | 15 | MYH14  | AK000947  | 20q11.23            |
| 208148_at   | 10 | MYH4   | NM_017533 | 17p13.1             |
| 204737_s_at | 15 | MYH7   | NM_000257 | 14q12               |
| 216265_x_at | 15 | MYH7   | AI292276  | 14q12               |
| 211926_s_at | 15 | MYH9   | AI827941  | 22q13.1             |

|             |    |                 |           |                 |
|-------------|----|-----------------|-----------|-----------------|
| 211014_s_at | 15 | MYL             | AF230410  | 15q22           |
| 205589_at   | 15 | MYL3            | NM_000258 | 3p21.3-p21.2    |
| 216054_x_at | 15 | MYL4            | X58851    | 17q21-qter      |
| 210395_x_at | 15 | MYL4            | AF116676  | 17q21-qter      |
| 205144_at   | 15 | MYL5            | L03785    | 4p16.3          |
| 205145_s_at | 11 | MYL5            | NM_002477 | 4p16.3          |
| 212082_s_at | 15 | MYL6            | BE734356  | 12q13.13        |
| 214002_at   | 15 | MYL6            | AA419227  | 12q13.13        |
| 219942_at   | 15 | MYL7            | NM_021223 | 7p21-p11.2      |
| 201058_s_at | 15 | MYL9            | NM_006097 | 20q11.23        |
| 221659_s_at | 14 | MYLC2PL         | BC002778  | 7q22.1          |
| 220319_s_at | 14 | MYLIP           | NM_013262 | 6p23-p22.3      |
| 202555_s_at | 14 | MYLK            | NM_005965 | 3q21            |
| 218926_at   | 15 | MYNN            | NM_018657 | 3q26.31         |
| 201976_s_at | 14 | MYO10           | NM_012334 | 5p15.1-p14.3    |
| 59375_at    | 13 | MYO15B          | AI825877  | ---             |
| 212364_at   | 15 | MYO1B           | BF432550  | 2q12-q34        |
| 212365_at   | 15 | MYO1B           | BF215996  | 2q12-q34        |
| 214656_x_at | 10 | MYO1C           | BE790157  | 17p13           |
| 32811_at    | 14 | MYO1C           | X98507    | 17p13           |
| 203072_at   | 11 | MYO1E           | NM_004998 | 15q21-q22       |
| 204527_at   | 13 | MYO5A           | NM_000259 | 15q21           |
| 218966_at   | 15 | MYO5C           | NM_018728 | 15q21           |
| 203216_s_at | 14 | MYO6            | NM_004999 | 6q13            |
| 208962_s_at | 15 | MYO6            | BE540552  | 11q12.2-q13.1   |
| 206656_s_at | 15 | MYOD1           | BC000353  | 11p15.4         |
| 205610_at   | 15 | MYOM1           | NM_003803 | 18p11.31-p11.32 |
| 205826_at   | 14 | MYOM2           | NM_003970 | 8p23.3          |
| 219728_at   | 15 | MYOT            | NM_006790 | 5q31            |
| 219509_at   | 13 | MYOZ1           | NM_021245 | 10q22.1         |
| 207148_x_at | 15 | MYOZ2           | NM_016599 | 4q26-q27        |
| 213782_s_at | 15 | MYOZ2           | BF939176  | 4q26-q27        |
| 201957_at   | 15 | MYPT2; MGC87886 | AF324888  | 1q32.1          |
| 214780_s_at | 12 | MYR5; myosin    | AK002201  | 19p13.1         |
| 200049_at   | 15 | MYST2           | NM_007067 | 17q21.32        |
| 202423_at   | 15 | MYST3           | NM_006766 | 8p11            |
| 212462_at   | 15 | MYST4           | AU144267  | 10q22.2         |
| 214496_x_at | 15 | MYST4           | NM_012330 | 10q22.2         |
| 212406_s_at | 15 | MYT1            | AB028973  | 20q13.33        |
| 209228_x_at | 15 | N33             | U42349    | 8p22            |
| 221867_at   | 10 | N4BP1           | BF436315  | 16q12.1         |
| 32069_at    | 15 | N4BP1           | AB014515  | 16q12.1         |
| 48612_at    | 15 | N4BP1           | AA225490  | 16q12.1         |
| 214775_at   | 14 | N4BP3           | AW139448  | 5q35.3          |
| 209272_at   | 15 | NAB1            | AF045451  | 2q32.3-q33      |
| 211139_s_at | 15 | NAB1            | AF045452  | 2q32.3-q33      |
| 212803_at   | 13 | NAB2            | BF337329  | 12q13           |
| 200735_x_at | 15 | NACA            | NM_005594 | 12q23-q24.1     |
| 208635_x_at | 15 | NACA            | BF976260  | 12q23-q24.1     |
| 222018_at   | 14 | NACA            | AI992187  | 12q23-q24.1     |



|             |    |                              |           |                |
|-------------|----|------------------------------|-----------|----------------|
| 211939_x_at | 15 | NACB                         | X74070    | 5q13.3         |
| 211546_x_at | 15 | NACP                         | L36674    | 4q21           |
| 210153_s_at | 15 | NAD(P)+ -dependent malic enz | M55905    | 6p25-p24       |
| 202926_at   | 15 | NAG                          | NM_015909 | 2p24           |
| 202943_s_at | 10 | NAGA                         | NM_000262 | 22q13-qter     |
| 218231_at   | 15 | NAGK                         | NM_017567 | 2p13.2         |
| 204360_s_at | 14 | NAGLU                        | NM_000263 | 17q21          |
| 218380_at   | 14 | NALP1                        | NM_021730 | 17p13          |
| 200597_at   | 15 | NANOS1                       | AI123320  | 10q26          |
| 218189_s_at | 15 | NANS                         | NM_018946 | 9p24.1-p23     |
| 47530_at    | 15 | NAP1                         | AA748492  | 9q31.1         |
| 204528_s_at | 15 | NAP1L1                       | NM_004537 | 12q21.1        |
| 208752_x_at | 15 | NAP1L1                       | AI888672  | 12q21.1        |
| 208753_s_at | 15 | NAP1L1                       | BC002387  | 12q21.1        |
| 208754_s_at | 15 | NAP1L1                       | AI888672  | 12q21.1        |
| 212967_x_at | 15 | NAP1L1                       | AW148801  | 12q21.1        |
| 213864_s_at | 15 | NAP1L1                       | AI985751  | 12q21.1        |
| 204749_at   | 15 | NAP1L3                       | NM_004538 | Xq21.3-q22     |
| 201414_s_at | 15 | NAP1L4                       | NM_005969 | 11p15.5        |
| 206491_s_at | 15 | NAPA                         | NM_003827 | 19q13.33       |
| 208751_at   | 15 | NAPA                         | BC001165  | 19q13.33       |
| 210048_at   | 15 | NAPG                         | BC001889  | 18p11.21       |
| 219862_s_at | 15 | NARF                         | NM_012336 | 17q25.3        |
| 219378_at   | 15 | NARG1L                       | NM_024561 | 13q13.3        |
| 218713_at   | 15 | NARG2                        | NM_024611 | 15q21.3        |
| 200027_at   | 15 | NARS                         | NM_004539 | 18q21.2-q21.3  |
| 201969_at   | 15 | NASP                         | AW003362  | 1p34.1         |
| 201970_s_at | 15 | NASP                         | NM_002482 | 1p34.1         |
| 214911_s_at | 15 | NAT                          | S78771    | 6p21.3         |
| 214440_at   | 15 | NAT1                         | NM_000662 | 8p23.1-p21.3   |
| 204382_at   | 14 | NAT9                         | NM_015654 | 17q25.2        |
| 218330_s_at | 15 | NAV2                         | NM_018162 | 11p15.1        |
| 37005_at    | 15 | NB                           | D28124    | 1p36.13-p36.11 |
| 210739_x_at | 15 | NBC                          | AF069510  | 4q21           |
| 221207_s_at | 15 | NBEA                         | NM_015678 | 13q13          |
| 217987_at   | 15 | NBLA00058                    | NM_019048 | 2p24.3-q21.3   |
| 219342_at   | 15 | NBLA04196                    | NM_022900 | 7q21.3         |
| 202907_s_at | 15 | NBN                          | NM_002485 | 8q21           |
| 201103_x_at | 15 | NBPF14                       | NM_015383 | ---            |
| 201104_x_at | 15 | NBPF14                       | NM_015383 | 1q21.2         |
| 201384_s_at | 15 | NBR1                         | NM_005899 | 17q21.1        |
| 202905_x_at | 13 | NBS1                         | AI796269  | 8q21           |
| 217299_s_at | 11 | NBS1                         | AK001017  | 8q21           |
| 203440_at   | 15 | NCAD                         | M34064    | 18q11.2        |
| 217359_s_at | 15 | NCAM                         | M22094    | 11q23.1        |
| 212843_at   | 15 | NCAM1                        | AA126505  | 11q23.1        |
| 214952_at   | 13 | NCAM1                        | BF348061  | 11q23.1        |
| 205669_at   | 11 | NCAM2                        | NM_004540 | 21q21.1        |
| 209520_s_at | 15 | NCBP1                        | BC001450  | 9q34.1         |
| 201517_at   | 15 | NCBP2                        | BC001255  | 3q29           |

|             |    |         |           |                     |
|-------------|----|---------|-----------|---------------------|
| 201521_s_at | 12 | NCBP2   | NM_007362 | 3q29                |
| 209556_at   | 13 | NCDN    | AB011179  | 1p34.3              |
| 204725_s_at | 15 | NCK1    | AI591085  | 3q21                |
| 211063_s_at | 15 | NCK1    | BC006403  | 3q21 /// 3q21       |
| 203315_at   | 10 | NCK2    | BC000103  | 2q12                |
| 207738_s_at | 15 | NCKAP1  | NM_013436 | 2q32                |
| 218697_at   | 15 | NCKIPSD | NM_016453 | 3p21                |
| 200610_s_at | 15 | NCL     | NM_005381 | 2q12-qter           |
| 209105_at   | 14 | NCOA1   | AI672428  | 2p23                |
| 209106_at   | 15 | NCOA1   | BF576458  | 2p23                |
| 212867_at   | 15 | NCOA2   | AI040324  | 8q13.2              |
| 207700_s_at | 15 | NCOA3   | NM_006534 | 20q12               |
| 209060_x_at | 14 | NCOA3   | AI438999  | 20q12               |
| 209061_at   | 15 | NCOA3   | AI761748  | 20q12               |
| 210774_s_at | 15 | NCOA4   | AL162047  | 10q11.2             |
| 219231_at   | 14 | NCOA6IP | NM_024831 | 8q11                |
| 200854_at   | 15 | NCOR1   | AB028970  | 17p11.2             |
| 200855_at   | 12 | NCOR1   | AW771910  | 17p11.2             |
| 200856_x_at | 14 | NCOR1   | BF437948  | 17p11.2             |
| 200857_s_at | 15 | NCOR1   | NM_006311 | 17p11.2             |
| 207760_s_at | 15 | NCOR2   | NM_006312 | 12q24               |
| 217045_x_at | 11 | NCR2    | AL136967  | 6p21.1              |
| 211805_s_at | 10 | NCX1    | AF108389  | 2p23-p22            |
| 201362_at   | 15 | ND1     | AF205218  | 1q25.1-q31.1        |
| 218414_s_at | 14 | NDE1    | NM_017668 | 16p13.11            |
| 208093_s_at | 15 | NDEL1   | NM_030808 | 17p13.1 /// 17p13.1 |
| 217800_s_at | 15 | NDFIP1  | NM_030571 | 5q31.3              |
| 209550_at   | 15 | NDN     | U35139    | 15q11.2-q12         |
| 210817_s_at | 15 | NDP52   | BC004130  | 17q21.33            |
| 200632_s_at | 15 | NDRG1   | NM_006096 | 8q24.3              |
| 206453_s_at | 15 | NDRG2   | NM_016250 | 14q11.2             |
| 217286_s_at | 15 | NDRG3   | BC001805  | ---                 |
| 209159_s_at | 15 | NDRG4   | AV724216  | 16q21-q22.1         |
| 202607_at   | 15 | NDST1   | AL526632  | 5q33.1              |
| 202298_at   | 15 | NDUFA1  | NM_004541 | Xq25-q26            |
| 217860_at   | 15 | NDUFA10 | NM_004544 | 2q37.3              |
| 220864_s_at | 15 | NDUFA13 | NM_015965 | 19p13.2             |
| 209224_s_at | 15 | NDUFA2  | BC003674  | 5q31                |
| 218563_at   | 15 | NDUFA3  | NM_004542 | 19q13.42            |
| 217773_s_at | 15 | NDUFA4  | NM_002489 | 7p21.3              |
| 201304_at   | 15 | NDUFA5  | NM_005000 | 7q32                |
| 202000_at   | 15 | NDUFA6  | BC002772  | 22q13.2-q13.31      |
| 202001_s_at | 15 | NDUFA6  | BC002772  | 22q13.2-q13.31      |
| 202785_at   | 14 | NDUFA7  | NM_005001 | 19p13.2             |
| 218160_at   | 15 | NDUFA8  | NM_014222 | 9q33.2-q34.11       |
| 202077_at   | 15 | NDUFAB1 | NM_005003 | 16p12.3             |
| 204125_at   | 15 | NDUFAF1 | NM_016013 | 15q11.2-q21.3       |
| 206790_s_at | 15 | NDUFB1  | NM_004545 | 14q32.13            |
| 218320_s_at | 15 | NDUFB11 | NM_019056 | Xp11.3              |
| 218200_s_at | 15 | NDUFB2  | NM_004546 | 7q34                |

|             |    |         |           |                     |
|-------------|----|---------|-----------|---------------------|
| 218201_at   | 15 | NDUFB2  | NM_004546 | 7q34                |
| 203371_s_at | 15 | NDUFB3  | NM_002491 | 2q31.3              |
| 218226_s_at | 15 | NDUFB4  | NM_004547 | 3q13.33             |
| 203621_at   | 15 | NDUFB5  | NM_002492 | 3q27.1              |
| 203613_s_at | 15 | NDUFB6  | NM_002493 | 9p13.3              |
| 202839_s_at | 15 | NDUFB7  | NM_004146 | 19p13.12-p13.11     |
| 201226_at   | 15 | NDUFB8  | NM_005004 | 10q23.2-q23.33      |
| 201227_s_at | 15 | NDUFB8  | NM_005004 | 10q23.2-q23.33      |
| 214241_at   | 15 | NDUFB8  | AA723057  | 10q23.2-q23.33      |
| 203478_at   | 15 | NDUFC1  | NM_002494 | 4q28.2-q31.1        |
| 206936_x_at | 15 | NDUFC2  | NM_022335 | 11q13.4             |
| 218101_s_at | 15 | NDUFC2  | NM_004549 | 11q13.4             |
| 203039_s_at | 15 | NDUFS1  | NM_005006 | 2q33-q34            |
| 201966_at   | 15 | NDUFS2  | NM_004550 | 1q23                |
| 208969_at   | 15 | NDUFS2L | AF050641  | 12p13.3             |
| 201740_at   | 15 | NDUFS3  | NM_004551 | 11p11.11            |
| 209303_at   | 15 | NDUFS4  | BC005270  | 5q11.1              |
| 201757_at   | 15 | NDUFS5  | NM_004552 | 1p34.2-p33          |
| 203606_at   | 15 | NDUFS6  | NM_004553 | 5p15.33             |
| 211752_s_at | 15 | NDUFS7  | BC005954  | 19p13.3 /// 19p13.3 |
| 203189_s_at | 15 | NDUFS8  | NM_002496 | 11q13               |
| 203190_at   | 15 | NDUFS8  | NM_002496 | 11q13               |
| 202941_at   | 15 | NDUFV2  | NM_021074 | 18p11.31-p11.2      |
| 203961_at   | 15 | NEBL    | AL157398  | 10p12               |
| 203962_s_at | 15 | NEBL    | NM_006393 | 10p12               |
| 207279_s_at | 15 | NEBL    | NM_016365 | 10p12 /// 10p12     |
| 216882_s_at | 15 | NEBL    | AL157398  | 10p12               |
| 217585_at   | 10 | NEBL    | BE502910  | 10p12               |
| 209300_s_at | 15 | NECAP1  | BC002888  | 12p13.31            |
| 220731_s_at | 11 | NECAP2  | NM_018090 | 1p36.13             |
| 209032_s_at | 15 | NECL2   | AF132811  | 11q23.2             |
| 213012_at   | 15 | NEDD4   | D42055    | 15q                 |
| 212445_s_at | 15 | NEDD4L  | AI357376  | 18q21               |
| 201840_at   | 15 | NEDD8   | NM_006156 | 14q11.2             |
| 202149_at   | 15 | NEDD9   | AL136139  | 6p25-p24            |
| 219502_at   | 13 | NEIL3   | NM_018248 | 4q34.3              |
| 213331_s_at | 15 | NEK1    | AV700007  | 4q33                |
| 219542_at   | 10 | NEK11   | NM_024800 | 3q22.1              |
| 204641_at   | 15 | NEK2    | NM_002497 | 1q32.2-q41          |
| 213116_at   | 15 | NEK3    | AI191920  | 13q14.13            |
| 204634_at   | 14 | NEK4    | NM_003157 | 3p21.1              |
| 212530_at   | 15 | NEK7    | AL080111  | 1q31.3              |
| 212299_at   | 15 | Nek8    | AL117502  | 14q24.2             |
| 221214_s_at | 15 | NELF    | NM_015537 | 9q34.3              |
| 218407_x_at | 15 | NENF    | NM_013349 | 1q32.3              |
| 204321_at   | 15 | NEO1    | NM_002499 | 15q22.3-q23         |
| 214934_at   | 13 | NEO1L   | AW411030  | 18q23               |
| 218678_at   | 15 | NES     | NM_024609 | 1q23.1              |
| 201829_at   | 15 | NET1    | AW263232  | 10p15               |
| 201830_s_at | 15 | NET1    | NM_005863 | 10p15               |

|             |    |               |           |                     |
|-------------|----|---------------|-----------|---------------------|
| 209890_at   | 15 | NET-4         | AF065389  | 4q23                |
| 218888_s_at | 14 | NETO2         | AI335263  | 16q11               |
| 216836_s_at | 15 | NEU           | X03363    | 17q11.2-q12         |
| 208926_at   | 15 | NEU; SIAL1    | U84246    | 6p21.3              |
| 212676_at   | 14 | NF1           | AW293356  | 17q11.2             |
| 212678_at   | 13 | NF1           | AW054826  | 17q11.2             |
| 213438_at   | 11 | NFASC         | AA995925  | ---                 |
| 210555_s_at | 12 | NFAT4; NFATX  | U85430    | 16q22.2             |
| 208003_s_at | 10 | NFAT5         | NM_006599 | 16q22.1             |
| 211105_s_at | 12 | NF-ATc/C      | U80918    | 18q23               |
| 212808_at   | 14 | NFATC2IP      | AI884627  | 16p12.1             |
| 212809_at   | 14 | NFATC2IP      | AA152202  | 16p12.1             |
| 217526_at   | 14 | NFATC2IP      | AI478300  | 16p12.1             |
| 217527_s_at | 15 | NFATC2IP      | AI478300  | 16p12.1             |
| 200758_s_at | 15 | NFE2L1        | NM_003204 | 17q21.3             |
| 200759_x_at | 15 | NFE2L1        | NM_003204 | 17q21.3             |
| 214179_s_at | 15 | NFE2L1        | H93013    | 17q21.3             |
| 201146_at   | 15 | NFE2L2        | NM_006164 | 2q31                |
| 209289_at   | 15 | NFIB          | AI700518  | 9p24.1              |
| 209290_s_at | 15 | NFIB          | BC001283  | 9p24.1              |
| 213029_at   | 15 | NFIB          | BG478428  | 9p24.1              |
| 213032_at   | 14 | NFIB          | AI186739  | 9p24.1              |
| 203574_at   | 15 | NFIL3         | NM_005384 | 9q22                |
| 203973_s_at | 15 | NF-IL6-beta   | M83667    | 8q11.21             |
| 209239_at   | 13 | NFKB1         | M55643    | 4q24                |
| 201502_s_at | 15 | NFKBIA        | NM_020529 | 14q13               |
| 206968_s_at | 14 | NFRKB         | NM_006165 | 11q24-q25           |
| 218455_at   | 15 | NFS1          | NM_021100 | 20q11.23            |
| 218127_at   | 15 | NFYB          | BC005316  | 12q22-q23           |
| 218128_at   | 15 | NFYB          | BC005316  | 12q22-q23           |
| 218129_s_at | 15 | NFYB          | BC005316  | 12q22-q23           |
| 202215_s_at | 15 | NFYC          | NM_014223 | 1p32                |
| 202216_x_at | 15 | NFYC          | BC005003  | 1p32                |
| 39966_at    | 15 | NGC; MGC44034 | AF059274  | 3p21.3              |
| 217963_s_at | 15 | NGFRAP1       | NM_014380 | Xq22.2              |
| 220742_s_at | 15 | NGLY1         | NM_018297 | 3p24.1              |
| 217722_s_at | 15 | NGRN          | NM_016645 | 15q26.1             |
| 208829_at   | 14 | NGS-17        | AF029750  | 6p21.3              |
| 219353_at   | 15 | NHLRC2        | NM_017687 | 10q26.11            |
| 201076_at   | 15 | NHP2L1        | NM_005008 | 22q13.2-q13.31      |
| 201077_s_at | 15 | NHPX; OTK27   | AF155235  | 22q13.2-q13.31      |
| 217966_s_at | 15 | NIBAN         | AF288391  | 1q25                |
| 217967_s_at | 15 | NIBAN         | AF288391  | 1q25                |
| 202007_at   | 15 | NID           | BF940043  | 1q43                |
| 202008_s_at | 15 | NID1          | NM_002508 | 1q43                |
| 204114_at   | 15 | NID2          | NM_007361 | 14q21-q22           |
| 218133_s_at | 13 | NIF3L1        | NM_021824 | 2q33                |
| 218334_at   | 15 | NIF3L1BP1     | NM_025075 | 3p21.1              |
| 202475_at   | 15 | NIFIE14       | NM_006326 | 19q13.1 /// 19q13.1 |
| 217896_s_at | 10 | NIP30         | NM_024946 | 16q13               |

|             |    |               |           |               |
|-------------|----|---------------|-----------|---------------|
| 212129_at   | 15 | NIPA2         | AI589507  | 15q11.2       |
| 207108_s_at | 12 | NIPBL         | NM_015384 | 5p13.2        |
| 213918_s_at | 15 | NIPBL         | BF221673  | 5p13.2        |
| 201708_s_at | 14 | NIPSNAP1      | AW083371  | 22q12.2       |
| 201709_s_at | 15 | NIPSNAP1      | NM_003634 | 22q12.2       |
| 221104_s_at | 15 | NIPSNAP3B     | NM_018376 | 9q31.3        |
| 201591_s_at | 15 | NISCH         | NM_007184 | 3p21.1        |
| 202891_at   | 15 | NIT1          | NM_005600 | 1q21-q22      |
| 218557_at   | 15 | NIT2          | NM_020202 | 3q12.3        |
| 203830_at   | 13 | NJMU-R1       | NM_022344 | 17q12         |
| 208680_at   | 15 | NKEFA         | L19184    | 1p34.1        |
| 211658_at   | 15 | NKEFB         | L19185    | 19p13.2       |
| 39729_at    | 15 | NKEFB         | L19185    | 19p13.2       |
| 218240_at   | 15 | NKIRAS2       | NM_017595 | 17q21.31      |
| 222105_s_at | 15 | NKIRAS2       | AA452565  | ---           |
| 205004_at   | 12 | NKRF          | NM_017544 | Xq25          |
| 202379_s_at | 15 | NKTR          | NM_005385 | 3p23-p21      |
| 202380_s_at | 15 | NKTR          | NM_005385 | 3p23-p21      |
| 215338_s_at | 13 | NKTR          | AI688640  | 3p23-p21      |
| 206578_at   | 15 | NKX2-5        | NM_004387 | 5q34          |
| 209706_at   | 12 | NKX3A; NKX3.1 | AF247704  | 8p21          |
| 205893_at   | 15 | NLGN1         | NM_014932 | 3q26.32       |
| 218318_s_at | 15 | NLK           | NM_016231 | 17q11.2       |
| 201577_at   | 15 | NME1          | NM_000269 | 17q21.3       |
| 201268_at   | 15 | NME2          | NM_002512 | 17q21.3       |
| 212739_s_at | 15 | NME4          | AL523860  | 16p13.3       |
| 205851_at   | 14 | NME6          | BC001808  | 3p21          |
| 219553_at   | 15 | NME7          | NM_013330 | 1q24          |
| 203964_at   | 13 | NMI           | NM_004688 | 2p24.3-q21.3  |
| 212372_at   | 15 | NMMHCB        | AK026977  | 17p13         |
| 201157_s_at | 15 | NMT           | AF020500  | 17q21.31      |
| 205005_s_at | 14 | NMT2          | AW293531  | 10p13         |
| 205006_s_at | 15 | NMT2          | NM_004808 | 10p13         |
| 206023_at   | 12 | NMU           | NM_006681 | 4q12          |
| 202237_at   | 13 | NNMT          | NM_006169 | 11q23.1       |
| 202238_s_at | 11 | NNMT          | NM_006169 | 11q23.1       |
| 218889_at   | 15 | NOC3L         | NM_022451 | 10q23.33      |
| 214427_at   | 10 | NOL1          | NM_006170 | 12p13         |
| 200874_s_at | 15 | NOL5A         | NM_006392 | 20p13         |
| 200875_s_at | 15 | NOL5A         | NM_006392 | 20p13         |
| 202882_x_at | 15 | NOL7          | NM_016167 | 6p23          |
| 210097_s_at | 15 | NOL7          | AF130102  | 6p23 /// 6p23 |
| 218244_at   | 15 | NOL8          | NM_017948 | 9q22.32       |
| 218754_at   | 15 | NOL9          | NM_024654 | 1p36.23       |
| 219110_at   | 14 | NOLA1         | NM_018983 | 4q25          |
| 209104_s_at | 15 | NOLA2         | BC000009  | 5q35.3        |
| 217962_at   | 15 | NOLA3         | NM_018648 | 15q14-q15     |
| 205895_s_at | 15 | NOLC1         | NM_004741 | 10q24.32      |
| 211951_at   | 15 | NOLC1         | AI355279  | 10q24.32      |
| 221853_s_at | 15 | NOMO3         | N39536    | 16p13.12      |

|             |    |          |           |               |
|-------------|----|----------|-----------|---------------|
| 200057_s_at | 15 | NONO     | NM_007363 | Xq13.1        |
| 208698_s_at | 15 | NONO     | BC002364  | Xq13.1        |
| 210470_x_at | 13 | NONO     | BC003129  | Xq13.1        |
| 217950_at   | 15 | NOSIP    | NM_015953 | 19q13.33      |
| 218902_at   | 15 | NOTCH1   | NM_017617 | 9q34.3        |
| 202443_x_at | 15 | NOTCH2   | NM_024408 | 1p13-p11      |
| 212377_s_at | 15 | NOTCH2   | AU158495  | 1p13-p11      |
| 214722_at   | 15 | NOTCH2NL | AW516297  | 1q21.2        |
| 203238_s_at | 15 | NOTCH3   | NM_000435 | 19p13.2-p13.1 |
| 205247_at   | 15 | NOTCH4   | NM_004557 | 6p21.3        |
| 204501_at   | 12 | NOV      | NM_002514 | 8q24.1        |
| 214321_at   | 15 | NOV      | BF440025  | 8q24.1        |
| 205794_s_at | 15 | NOVA1    | NM_002515 | 14q           |
| 219773_at   | 14 | NOX4     | NM_016931 | 11q14.2-q21   |
| 201695_s_at | 15 | NP       | NM_000270 | 14q13.1       |
| 211358_s_at | 15 | NP94     | AF234161  | 9q34.1        |
| 218506_x_at | 15 | N-PAC    | NM_018459 | 16p13.3       |
| 222115_x_at | 14 | N-PAC    | BC003693  | 16p13.3       |
| 218294_s_at | 14 | NPAP60   | AF267865  | 22q13.31      |
| 205459_s_at | 10 | NPAS2    | NM_002518 | 2q11.2        |
| 213462_at   | 11 | NPAS2    | AW000928  | 2q11.2        |
| 39548_at    | 14 | NPAS2    | U77970    | 2q11.2        |
| 39549_at    | 15 | NPAS2    | AI743090  | 2q11.2        |
| 209798_at   | 15 | NPAT     | D83243    | 11q22-q23     |
| 202679_at   | 15 | NPC1     | NM_000271 | 18q11-q12     |
| 200701_at   | 15 | NPC2     | NM_006432 | 14q24.3       |
| 200941_at   | 15 | NPC-A-13 | AK026575  | 16q23.3       |
| 218446_s_at | 15 | NPD008   | AF223467  | 17p11.2       |
| 210574_s_at | 15 | NPD011   | AF241788  | 1p35-p34      |
| 209378_s_at | 15 | NPD012   | AF241785  | 10q23.2       |
| 209379_s_at | 15 | NPD012   | AF241785  | 10q23.2       |
| 209006_s_at | 14 | NPD014   | AF247168  | 1p36.13-p35.1 |
| 209007_s_at | 15 | NPD014   | AF247168  | 1p36.13-p35.1 |
| 218086_at   | 13 | NPDC1    | NM_015392 | 9q34.3        |
| 89476_r_at  | 14 | NPEPL1   | AA398062  | 20q13.32      |
| 201454_s_at | 15 | NPEPPS   | NM_006310 | 17q21         |
| 214101_s_at | 10 | NPEPPS   | BG153399  | 17q21         |
| 213471_at   | 11 | NPHP4    | AB014573  | 1p36.22       |
| 204538_x_at | 15 | NIPI     | NM_006985 | 16p13.13      |
| 217796_s_at | 15 | NPL4     | NM_017921 | 17qter        |
| 200063_s_at | 15 | NPM1     | BC002398  | 5q35          |
| 221923_s_at | 15 | NPM1     | AA191576  | 5q35          |
| 206801_at   | 15 | NPPB     | NM_002521 | 1p36.2        |
| 214066_x_at | 10 | NPR2     | AA565715  | 9p21-p12      |
| 219789_at   | 12 | NPR3     | NM_000908 | 5p14-p13      |
| 209201_x_at | 13 | NPYR     | L01639    | 2q21          |
| 201468_s_at | 13 | NQO1     | NM_000903 | 16q22.1       |
| 210519_s_at | 12 | NQO1     | BC000906  | 16q22.1       |
| 203814_s_at | 15 | NQO2     | NM_000904 | 6pter-q12     |
| 209750_at   | 12 | NR1D2    | N32859    | 3p24.1        |

|             |    |                |           |                   |
|-------------|----|----------------|-----------|-------------------|
| 218215_s_at | 15 | NR1H2          | NM_007121 | 19q13.3-19q13.3   |
| 203920_at   | 15 | NR1H3          | NM_005693 | 11p11.2           |
| 204791_at   | 15 | NR2C1          | NM_003297 | 12q23.1           |
| 209505_at   | 11 | NR2F1          | AI951185  | 5q14              |
| 209120_at   | 15 | NR2F2          | AL037401  | 15q26             |
| 215073_s_at | 14 | NR2F2          | AL554245  | 15q26             |
| 209262_s_at | 11 | NR2F6          | BC002669  | 19p13.1           |
| 201865_x_at | 15 | NR3C1          | AI432196  | ---               |
| 201866_s_at | 12 | NR3C1          | NM_000176 | 5q31              |
| 211671_s_at | 15 | NR3C1          | U01351    | 5q31 /// 5q31     |
| 205259_at   | 15 | NR3C2          | NM_000901 | 4q31.1            |
| 210904_s_at | 15 | NR4; IL-13Ra   | U81380    | Xq24              |
| 202340_x_at | 15 | NR4A1          | NM_002135 | 12q13             |
| 204622_x_at | 11 | NR4A2          | NM_006186 | 2q22-q23          |
| 207978_s_at | 11 | NR4A3          | NM_006981 | 9q22              |
| 209014_at   | 15 | NRAGE; DLXIN-1 | AF217963  | Xp11.23           |
| 202647_s_at | 15 | NRAS           | NM_002524 | 1p13.2            |
| 221803_s_at | 14 | NRBF2          | AA883074  | 10q22.1           |
| 217765_at   | 15 | NRBP1          | NM_013392 | 2p23              |
| 208979_at   | 15 | NRC            | AF128458  | 20q11             |
| 208709_s_at | 15 | NRD1           | U64898    | 1p32.2-p32.1      |
| 204651_at   | 15 | NRF1           | AW003022  | 7q32              |
| 204652_s_at | 11 | NRF1           | NM_005011 | 7q32              |
| 202599_s_at | 15 | NRIP1          | NM_003489 | 21q11.2           |
| 202600_s_at | 13 | NRIP1          | AI824012  | 21q11.2           |
| 219557_s_at | 10 | NRIP3          | AJ400877  | 11p15.3           |
| 218625_at   | 15 | NRN1           | NM_016588 | 6p25.1            |
| 210510_s_at | 14 | NRP            | AF145712  | 10p12             |
| 212298_at   | 15 | NRP1           | BE620457  | 10p12             |
| 214632_at   | 11 | NRP2           | AA295257  | 2q33.3            |
| 221238_at   | 10 | NSBP1          | NM_030763 | Xq13.3 /// Xq13.3 |
| 209279_s_at | 12 | NSDHL          | BC000245  | Xq28              |
| 215093_at   | 14 | NSDHL          | U82671    | Xq28              |
| 208627_s_at | 15 | NSEP1          | BE966374  | 1p34              |
| 217830_s_at | 15 | NSFL1C         | NM_016143 | 20p13             |
| 220248_x_at | 15 | NSFL1C         | NM_018839 | 20p13             |
| 203269_at   | 15 | NSMAF          | NM_003580 | 8q12-q13          |
| 210178_x_at | 14 | NSSR           | AF047448  | 1p36.11           |
| 203802_x_at | 15 | NSUN5          | NM_018044 | 7q11.23           |
| 213773_x_at | 15 | NSUN5          | AW248552  | 7q11.23           |
| 209155_s_at | 15 | NT5C2          | BC001595  | 10q24.33          |
| 203939_at   | 12 | NT5E           | NM_002526 | 6q14-q21          |
| 213061_s_at | 15 | NTAN1          | AA643304  | 16p13.13          |
| 213062_at   | 15 | NTAN1          | AA643304  | 16p13.13          |
| 203718_at   | 13 | NTE            | NM_006702 | 19p13.3-p13.2     |
| 207152_at   | 14 | NTRK2          | NM_006180 | 9q22.1            |
| 221795_at   | 10 | NTRK2          | AA707199  | 9q22.1            |
| 221796_at   | 14 | NTRK2          | AA707199  | 9q22.1            |
| 206291_at   | 14 | NTS            | NM_006183 | 12q21             |
| 204589_at   | 15 | NUAK1          | NM_014840 | 12q24.11          |

|             |    |           |           |                   |
|-------------|----|-----------|-----------|-------------------|
| 220987_s_at | 10 | NUAK2     | NM_030952 | 1q32.1 /// 1q32.1 |
| 203978_at   | 15 | NUBP1     | NM_002484 | 16p13.2           |
| 218227_at   | 14 | NUBP2     | NM_012225 | 16p13.3           |
| 220176_at   | 13 | NUBPL     | NM_025152 | 14q12             |
| 200646_s_at | 14 | NUCB1     | NM_006184 | 19q13.2-q13.4     |
| 200649_at   | 15 | NUCB1     | BC002356  | 19q13.2-q13.4     |
| 203675_at   | 15 | NUCB2     | NM_005013 | 11p15.1-p14       |
| 217802_s_at | 15 | NUCKS1    | NM_022731 | 1q32.1            |
| 201173_x_at | 15 | NUDC      | NM_006600 | 1p35-p34          |
| 214136_at   | 14 | NUDT13    | W80642    | 10q22.3           |
| 219347_at   | 15 | NUDT15    | NM_018283 | 13q14.12          |
| 218609_s_at | 10 | NUDT2     | NM_001161 | 9p13              |
| 202697_at   | 15 | NUDT21    | NM_007006 | 16q13             |
| 211973_at   | 11 | NUDT3     | AW341200  | ---               |
| 212605_s_at | 13 | NUDT3     | AK025759  | ---               |
| 206302_s_at | 15 | NUDT4     | NM_019094 | ---               |
| 206303_s_at | 15 | NUDT4     | NM_019094 | ---               |
| 212181_s_at | 15 | NUDT4     | AF191654  | ---               |
| 212183_at   | 15 | NUDT4     | AB007956  | ---               |
| 218375_at   | 15 | NUDT9     | NM_024047 | 4q22.1            |
| 200747_s_at | 15 | NUMA1     | NM_006185 | 11q13             |
| 218768_at   | 15 | NUP107    | NM_020401 | 12q14.3           |
| 202184_s_at | 15 | NUP133    | NM_018230 | 1q42.13           |
| 202097_at   | 15 | NUP153    | NM_005124 | 6p22.3            |
| 212709_at   | 14 | Nup160    | D83781    | 11p11.12          |
| 212247_at   | 15 | NUP205    | AW008531  | 7q33              |
| 202155_s_at | 13 | NUP214    | NM_005085 | 9q34.1            |
| 218622_at   | 15 | NUP37     | NM_024057 | 12q23.3           |
| 219007_at   | 15 | NUP43     | NM_024647 | 6q24.3            |
| 213682_at   | 15 | NUP50     | AL036344  | 22q13.31          |
| 218256_s_at | 15 | NUP54     | NM_017426 | 4q21.21           |
| 202153_s_at | 14 | NUP62     | NM_016553 | 19q13.33          |
| 218014_at   | 15 | NUP85     | NM_024844 | 17q25.2           |
| 202900_s_at | 15 | NUP88     | NM_002532 | 17p13.2           |
| 203195_s_at | 15 | NUP98     | NM_005387 | 11p15.5           |
| 210793_s_at | 14 | NUP98     | U41815    | 11p15.5           |
| 204435_at   | 14 | NUPL1     | NM_014778 | 13q12.13          |
| 204003_s_at | 10 | NUPL2     | NM_007342 | 7p15              |
| 218039_at   | 15 | NUSAP1    | NM_016359 | 15q14             |
| 219978_s_at | 13 | NUSAP1    | NM_018454 | 15q14             |
| 202397_at   | 15 | NUTF2     | NM_005796 | 16q22.1           |
| 208922_s_at | 15 | NXF1      | BC004904  | 11q12-q13         |
| 218708_at   | 15 | NXT1      | NM_013248 | 20p12-p11.2       |
| 213241_at   | 15 | NY-REN-58 | AF035307  | 12q23.3           |
| 213288_at   | 15 | OACT2     | AI761250  | 2p25.2            |
| 201599_at   | 15 | OAT       | NM_000274 | 10q26             |
| 215947_s_at | 15 | OAZ1      | AF090094  | 19p13.3           |
| 215952_s_at | 15 | OAZ1      | AF090094  | 19p13.3           |
| 201364_s_at | 15 | OAZ2      | AF242521  | 15q22.1           |
| 201365_at   | 13 | OAZ2      | NM_002537 | 15q22.1           |



|             |    |              |           |              |
|-------------|----|--------------|-----------|--------------|
| 212461_at   | 15 | OAZIN        | BF793951  | 8q22.3       |
| 219100_at   | 15 | OBFC1        | NM_024928 | 10q25.1      |
| 211355_x_at | 12 | OBR          | U52914    | 1p31         |
| 211356_x_at | 11 | OBR          | U66495    | 1p31         |
| 222324_at   | 14 | OBSCN        | AI344415  | ---          |
| 208274_at   | 11 | OCLM         | NM_022375 | ---          |
| 203446_s_at | 14 | OCRL         | NM_000276 | Xq25-q26.1   |
| 205074_at   | 14 | OCTN2        | AB015050  | 5q31         |
| 209731_at   | 15 | OCTS3        | U79718    | 16p13.3      |
| 213018_at   | 15 | ODAG         | AI337901  | 7q21-q22     |
| 214718_at   | 15 | ODAG         | AK026142  | 7q21-q22     |
| 200790_at   | 15 | ODC1         | NM_002539 | 2p25         |
| 203569_s_at | 15 | OFD1         | NM_003611 | Xp22.2-p22.3 |
| 210135_s_at | 12 | OG12         | AF022654  | 3q25-q26.1   |
| 209003_at   | 15 | OGC; SLC20A4 | AF070548  | 17p13.3      |
| 201282_at   | 15 | OGDH         | NM_002541 | 7p14-p13     |
| 219277_s_at | 12 | OGDHL        | NM_018245 | 10q11.23     |
| 210443_x_at | 10 | OGFR         | AF172452  | 20q13.3      |
| 205301_s_at | 12 | OGG1         | NM_016820 | 3p26.2       |
| 205760_s_at | 15 | OGG1         | NM_016821 | 3p26.2       |
| 218730_s_at | 15 | OGN          | AF202167  | 9q22         |
| 207564_x_at | 15 | OGT          | NM_003605 | Xq13         |
| 212307_s_at | 15 | OGT          | BF001665  | Xq13         |
| 209129_at   | 15 | OIP1         | AF000974  | 7q22         |
| 214924_s_at | 15 | OIP106       | AK000754  | 3p25.3-p24.1 |
| 215136_s_at | 15 | OIP2         | AL050353  | 13q13.1      |
| 213599_at   | 14 | OIP5         | BE045993  | 15q14        |
| 213131_at   | 11 | OLFM1        | R38389    | 9q34.3       |
| 217525_at   | 15 | OLFML1       | AW305097  | 11p15.4      |
| 213075_at   | 15 | OLFML2A      | AL050002  | 9q34.11      |
| 213125_at   | 15 | OLFML2B      | AW007573  | 1q23.1       |
| 218162_at   | 15 | OLFML3       | NM_020190 | 1p13.1       |
| 205907_s_at | 12 | OMD          | AI765819  | 9q22.32      |
| 211152_s_at | 15 | OMI          | AF184911  | 2p12         |
| 212213_x_at | 15 | OPA1         | AB011139  | 3q28-q29     |
| 212214_at   | 10 | OPA1         | BF439570  | 3q28-q29     |
| 214306_at   | 15 | OPA1         | AA209332  | 3q28-q29     |
| 206323_x_at | 15 | OPHN1        | NM_002547 | Xq12         |
| 222025_s_at | 14 | OPLAH        | AI991887  | 8q24.3       |
| 209875_s_at | 15 | OPN          | M83248    | 4q21-q25     |
| 219032_x_at | 15 | OPN3         | NM_014322 | 1q43         |
| 201692_at   | 14 | OPRS1        | NM_005866 | 9p13.2       |
| 202073_at   | 15 | OPTN         | AV757675  | 10p14        |
| 202074_s_at | 15 | OPTN         | AV757675  | 10p14        |
| 221464_at   | 10 | OR1D2        | NM_002548 | 17p13-p12    |
| 221460_at   | 10 | OR2C1        | NM_012368 | 16p13.3      |
| 222327_x_at | 10 | OR7E156P     | AA459867  | ---          |
| 217499_x_at | 15 | OR7E76       | AW874308  | ---          |
| 210028_s_at | 15 | ORC3         | AF125507  | 6q14.3-q16.1 |
| 203351_s_at | 15 | ORC4L        | NM_002552 | 2q22-q23     |

|             |    |                       |           |               |
|-------------|----|-----------------------|-----------|---------------|
| 203352_at   | 10 | ORC4L                 | NM_002552 | 2q22-q23      |
| 204957_at   | 15 | ORC5L                 | NM_002553 | 7q22.1        |
| 211212_s_at | 11 | ORC5L                 | AF081459  | 7q22.1        |
| 219105_x_at | 14 | ORC6L                 | NM_014321 | 16q12         |
| 218556_at   | 15 | ORMDL2                | NM_014182 | 12q13.13      |
| 209485_s_at | 15 | ORP1                  | AF274714  | 18q11.1       |
| 212582_at   | 15 | ORP8                  | AL049923  | 12q14         |
| 208735_s_at | 15 | OS4; PSR2; SCP2       | AF022231  | 12q13-q15     |
| 200714_x_at | 15 | OS9                   | NM_006812 | 12q13         |
| 215399_s_at | 15 | OS-9                  | AI683900  | 12q13         |
| 201800_s_at | 15 | OSBP1                 | AF185696  | 11q12-q13     |
| 219073_s_at | 14 | OSBPL10               | NM_017784 | 3p22.3        |
| 218304_s_at | 15 | OSBPL11               | NM_022776 | 3q21          |
| 208158_s_at | 15 | OSBPL1A               | NM_018030 | 18q11.1       |
| 209221_s_at | 15 | OSBPL2                | AI753638  | 20q13.3       |
| 209222_s_at | 15 | OSBPL2                | AI753638  | 20q13.3       |
| 212585_at   | 15 | OSBPL8                | BF970829  | 12q14         |
| 218047_at   | 15 | OSBPL9                | NM_024586 | 1p32.3        |
| 210809_s_at | 15 | osf-2                 | D13665    | 13q13.3       |
| 207173_x_at | 15 | osf-4                 | D21254    | 16q22.1       |
| 209450_at   | 12 | OSGEP                 | AB050442  | 14q11.2       |
| 205729_at   | 10 | OSMR                  | NM_003999 | 5p13.2        |
| 219421_at   | 15 | OSRF                  | NM_012382 | 5p15.2-p12    |
| 218196_at   | 15 | OSTM1                 | NM_014028 | 6q21          |
| 201245_s_at | 15 | OTUB1                 | AL523776  | 11q13.1       |
| 38710_at    | 15 | OTUB1                 | AL096714  | 11q13.1       |
| 203480_s_at | 15 | OTUD4                 | NM_014928 | 4q31.21       |
| 208717_at   | 15 | OXA1L                 | BC001669  | 14q11.2       |
| 202780_at   | 15 | OXCT1                 | NM_000436 | 5p13          |
| 218197_s_at | 15 | OXR1                  | NM_018002 | 8q23          |
| 219133_at   | 15 | OXSM                  | NM_017897 | 3p24.1        |
| 202696_at   | 15 | OXSR1                 | NM_005109 | 3p22-p21.3    |
| 206825_at   | 12 | OXTR                  | NM_000916 | 3p25          |
| 221539_at   | 15 | P/OKcl.6              | AB044548  | 8p12          |
| 203879_at   | 15 | p110D                 | U86453    | 1p36.2        |
| 213039_at   | 10 | P114-RHO-GEF          | AB011093  | 19p13.3       |
| 209175_at   | 15 | P125; MSTP053         | AK001135  | 10q25-q26     |
| 212331_at   | 15 | p130                  | X76061    | 16q12.2       |
| 212932_at   | 12 | P130                  | AK022494  | 2q21.3        |
| 202373_s_at | 15 | p150                  | AF255648  | 1q42.11       |
| 218209_s_at | 14 | P15RS                 | NM_018170 | 18q12.2       |
| 211792_s_at | 11 | p18; INK4C; p18-INK4C | U17074    | 1p32          |
| 210240_s_at | 13 | p19                   | U20498    | 19p13         |
| 208795_s_at | 15 | P1cdc47               | D55716    | 7q21.3-q22.1  |
| 208764_s_at | 15 | P2                    | D13119    | 12q13.13      |
| 204088_at   | 14 | P2RX4                 | NM_002560 | 12q24.32      |
| 221466_at   | 12 | P2RY4                 | NM_002565 | Xq13          |
| 218589_at   | 15 | P2RY5                 | NM_005767 | 13q14         |
| 207543_s_at | 15 | P4HA1                 | NM_000917 | 10q21.3-q23.1 |
| 202733_at   | 15 | P4HA2                 | NM_004199 | 5q31          |

|             |    |                   |           |               |
|-------------|----|-------------------|-----------|---------------|
| 200654_at   | 15 | P4HB              | J02783    | 17q25         |
| 200656_s_at | 15 | P4HB              | NM_000918 | 17q25         |
| 209953_s_at | 12 | P50CDC37          | U63131    | 19p13.2       |
| 209337_at   | 15 | p52               | AF063020  | 9p22.2        |
| 210758_at   | 10 | p52               | AF098482  | 9p22.2        |
| 218403_at   | 15 | P53CSV            | NM_016399 | 12q24.31      |
| 210241_s_at | 15 | P53TG1            | AB007458  | 7q21.1        |
| 210886_x_at | 15 | P53TG1            | AB007457  | 7q21.1        |
| 209917_s_at | 14 | P53TG1            | BC002709  | 7q21.1        |
| 208612_at   | 15 | P58               | D83485    | 15q15         |
| 208843_s_at | 15 | p59               | BC001408  | 2q31.1-q31.2  |
| 211552_s_at | 12 | P5CDh             | U24267    | 1p36          |
| 217791_s_at | 15 | P5CSL             | U76542    | 10q24.3       |
| 216835_s_at | 15 | P62DOK; MGC117395 | AF035299  | 2p13          |
| 215749_s_at | 15 | P65               | AK001574  | 3p22-p21.33   |
| 209861_s_at | 15 | p67; MNPEP        | U13261    | 12q23.1       |
| 208719_s_at | 14 | P72               | U59321    | 22q13.1       |
| 216347_s_at | 14 | p85               | AK023188  | 14q32.33      |
| 208649_s_at | 15 | p97               | AF100752  | 9p13-p12      |
| 214794_at   | 15 | PA2G4             | BF669264  | 12q13         |
| 215823_x_at | 15 | PABP              | U64661    | Xq13-q21      |
| 215157_x_at | 15 | PABPC1            | AI734929  | 8q22.2-q23    |
| 208113_x_at | 15 | PABPC3            | NM_030979 | 13q12-q13     |
| 201064_s_at | 15 | PABPC4            | NM_003819 | 1p32-p36      |
| 201544_x_at | 15 | PABPN1            | BF675004  | 14q11.2-q13   |
| 201545_s_at | 15 | PABPN1            | NM_004643 | 14q11.2-q13   |
| 213046_at   | 15 | PABPN1            | AI130920  | 14q11.2-q13   |
| 41329_at    | 13 | PACE-1            | AI458463  | 1q23.3        |
| 214204_at   | 15 | PACRG             | BF224076  | 6q26          |
| 212778_at   | 15 | PACS1L            | AL583340  | 14q32.33      |
| 201651_s_at | 15 | PACSIN2           | NM_007229 | 22q13.2-13.33 |
| 218744_s_at | 14 | PACSIN3           | NM_016223 | 11p12-p11.12  |
| 202093_s_at | 15 | PAF1              | NM_019088 | 19q13.1       |
| 320_at      | 13 | PAF-2             | D83703    | 6p21.1        |
| 200813_s_at | 11 | PAFAH1B1          | BE256969  | 17p13.3       |
| 200816_s_at | 15 | PAFAH1B1          | NM_000430 | 17p13.3       |
| 210160_at   | 14 | PAFAH1B2          | BC000398  | 11q23         |
| 203228_at   | 11 | PAFAH1B3          | NM_002573 | 19q13.1       |
| 201013_s_at | 15 | PAICS             | AA902652  | 4pter-q21     |
| 201014_s_at | 15 | PAICS             | NM_006452 | 4pter-q21     |
| 209063_x_at | 15 | PAIP1             | BF248165  | ---           |
| 210283_x_at | 15 | PAIP1             | BC005295  | 5p12          |
| 213754_s_at | 15 | PAIP1             | AW613203  | 5p12          |
| 217724_at   | 15 | PAI-RBP1          | BE730433  | 1p31-p22      |
| 217725_x_at | 15 | PAI-RBP1          | BE730433  | 1p31-p22      |
| 218886_at   | 11 | PAK1IP1           | NM_017906 | 6p24.1        |
| 208875_s_at | 14 | PAK2              | AF092132  | 3q29          |
| 208877_at   | 15 | PAK2              | W74494    | 3q29          |
| 208878_s_at | 14 | PAK2              | AF092132  | 3q29          |
| 33814_at    | 15 | PAK4              | AF005046  | 19q13.2       |

|             |    |             |           |                |
|-------------|----|-------------|-----------|----------------|
| 200897_s_at | 15 | PALLD       | NM_016081 | 4q32.3         |
| 200906_s_at | 15 | PALLD       | NM_016081 | 4q32.3         |
| 203859_s_at | 11 | PALM        | NM_002579 | 19p13.3        |
| 202759_s_at | 15 | PALM2-AKAP2 | BE879367  | 9q31-q33       |
| 202760_s_at | 15 | PALM2-AKAP2 | NM_007203 | 9q31-q33       |
| 218736_s_at | 14 | PALMD       | NM_017734 | 1p22-p21       |
| 202336_s_at | 15 | PAM         | NM_000919 | 5q14-q21       |
| 212958_x_at | 15 | PAM         | AI022882  | 5q14-q21       |
| 214620_x_at | 15 | PAM         | BF038548  | 5q14-q21       |
| 222203_s_at | 15 | PAN2        | AK023625  | 2p24.3         |
| 218809_at   | 15 | PANK2       | NM_024960 | 20p13          |
| 218433_at   | 14 | PANK3       | NM_024594 | 5q34           |
| 221751_at   | 15 | PANK3       | AL565516  | 5q34           |
| 218771_at   | 15 | PANK4       | NM_018216 | 1p36.32        |
| 204715_at   | 14 | PANX1       | NM_015368 | 11q21          |
| 50400_at    | 10 | PAOX        | AI743990  | 10q26.3        |
| 210946_at   | 15 | PAP2-a2     | AF014403  | 5q11           |
| 218947_s_at | 14 | PAPD1       | NM_018109 | 10p12.1        |
| 222282_at   | 11 | PAPD4       | AV761453  | ---            |
| 209388_at   | 15 | PAPOLA      | BC000927  | 14q32.31       |
| 212718_at   | 15 | PAPOLA      | BF797555  | 14q32.31       |
| 212720_at   | 14 | PAPOLA      | AI670847  | 14q32.31       |
| 222035_s_at | 15 | PAPOLA      | AI984479  | 14q32.31       |
| 222273_at   | 14 | PAPOLG      | AI419423  | ---            |
| 203058_s_at | 15 | PAPSS2      | AW299958  | 10q23-q24      |
| 203059_s_at | 14 | PAPSS2      | NM_004670 | 10q23-q24      |
| 203060_s_at | 15 | PAPSS2      | NM_004670 | 10q23-q24      |
| 213372_at   | 14 | PAQR3       | AW173157  | 4q21.23        |
| 219236_at   | 10 | PAQR6       | NM_024897 | 1q23.1         |
| 210434_x_at | 15 | PAR         | AF151056  | 1q21           |
| 205245_at   | 13 | PARD6A      | NM_016948 | 16q22.1        |
| 205060_at   | 11 | PARG        | NM_003631 | 10q11.23       |
| 200006_at   | 15 | PARK7       | NM_007262 | 1p36.33-p36.12 |
| 203905_at   | 11 | PARN        | NM_002582 | 16p13          |
| 218543_s_at | 15 | PARP12      | NM_022750 | 7q34           |
| 219034_at   | 13 | PARP16      | NM_017851 | 15q22.2        |
| 204752_x_at | 12 | PARP2       | NM_005484 | 14q11.2-q12    |
| 215773_x_at | 15 | PARP2       | AJ236912  | 14q11.2-q12    |
| 202239_at   | 12 | PARP4       | NM_006437 | 13q11          |
| 219639_x_at | 15 | PARP6       | NM_020213 | 15q22.33       |
| 219033_at   | 12 | PARP8       | NM_024615 | 5q11.2         |
| 217890_s_at | 14 | PARVA       | NM_018222 | 11p15.3        |
| 216253_s_at | 14 | PARVB       | N73272    | 22q13.2-q13.33 |
| 37965_at    | 15 | PARVB       | AA181053  | 22q13.2-q13.33 |
| 37966_at    | 15 | PARVB       | AA187563  | 22q13.2-q13.33 |
| 222221_x_at | 12 | PAST        | AY007161  | 11q13          |
| 204004_at   | 14 | PAWR        | AI336206  | 12q21          |
| 204005_s_at | 14 | PAWR        | NM_002583 | 12q21          |
| 121_at      | 15 | PAX8        | X69699    | 2q12-q14       |
| 212825_at   | 15 | PAXIP1L     | AI357401  | 7q36           |

|             |    |         |           |               |
|-------------|----|---------|-----------|---------------|
| 220355_s_at | 15 | PB1     | AF177387  | 3p21          |
| 217738_at   | 15 | PBEF1   | NM_005746 | 7q22.2        |
| 217739_s_at | 15 | PBEF1   | NM_005746 | 7q22.2        |
| 209584_x_at | 14 | PBI     | AF165520  | 22q13.1-q13.2 |
| 219148_at   | 15 | PBK     | NM_018492 | 8p21.2        |
| 205353_s_at | 15 | PBP     | NM_002567 | 12q24.23      |
| 211941_s_at | 15 | PBP     | BE969671  | 12q24.23      |
| 205253_at   | 14 | PBX1    | NM_002585 | 1q23          |
| 212148_at   | 15 | PBX1    | AL049381  | 1q23          |
| 212151_at   | 14 | PBX1    | BF967998  | 1q23          |
| 202875_s_at | 15 | PBX2    | BE397715  | 6p21.3        |
| 202876_s_at | 14 | PBX2    | NM_002586 | 6p21.3        |
| 204082_at   | 15 | PBX3    | NM_006195 | 9q33-q34      |
| 214177_s_at | 14 | PBXIP1  | AI935162  | 1q22          |
| 212857_x_at | 15 | PC4     | BG231551  | 5p13.3        |
| 221727_at   | 15 | PC4     | AA456973  | 5p13.3        |
| 203845_at   | 15 | PCAF    | AV727449  | 3p24          |
| 203557_s_at | 15 | PCBD1   | NM_000281 | 10q22         |
| 208620_at   | 15 | PCBP1   | U24223    | 2p13-p12      |
| 204031_s_at | 15 | PCBP2   | NM_005016 | 12q12         |
| 213517_at   | 15 | PCBP2   | AW103422  | 12q12         |
| 209361_s_at | 15 | PCBP4   | BC004153  | 3p21          |
| 203860_at   | 15 | PCCA    | NM_000282 | 13q32         |
| 212694_s_at | 15 | PCCB    | NM_000532 | 3q21-q22      |
| 219656_at   | 14 | PCDH12  | NM_016580 | 5q31          |
| 218892_at   | 15 | PCDH16  | NM_024542 | 11p15.4       |
| 205656_at   | 15 | PCDH17  | NM_014459 | 13q14.3       |
| 219737_s_at | 11 | PCDH9   | NM_020403 | ---           |
| 205717_x_at | 15 | PCDHGC3 | NM_002588 | 5q31          |
| 209079_x_at | 15 | PCDHGC3 | AF152318  | 5q31          |
| 211066_x_at | 15 | PCDHGC3 | BC006439  | 5q31 /// 5q31 |
| 215836_s_at | 15 | PCDHGC3 | AK026188  | 5q31          |
| 203378_at   | 15 | PCF11   | AB020631  | 11q13         |
| 203792_x_at | 11 | PCGF2   | NM_007144 | 17q21.2       |
| 203793_x_at | 15 | PCGF2   | NM_007144 | 17q21.2       |
| 213551_x_at | 15 | PCGF2   | AI744229  | ---           |
| 214239_x_at | 15 | PCGF2   | AI560455  | ---           |
| 204564_at   | 15 | PCGF3   | NM_006315 | 4p16.3        |
| 212753_at   | 15 | PCGF3   | AI692203  | 4p16.3        |
| 202265_at   | 15 | PCGF4   | NM_005180 | 10p11.23      |
| 208715_at   | 15 | PCIA3   | AB020980  | 1q22-q25      |
| 208716_s_at | 15 | PCIA3   | AB020980  | 1q22-q25      |
| 210768_x_at | 15 | PCIA3   | AF274935  | 1q22-q25      |
| 211098_x_at | 14 | PCIA3   | AF277194  | 1q22-q25      |
| 210335_at   | 10 | PCIP1   | AF056209  | 12q21.32      |
| 202174_s_at | 15 | PCM1    | NM_006197 | 8p22-p21.3    |
| 209997_x_at | 10 | PCM1    | BC000453  | 8p22-p21.3    |
| 214118_x_at | 15 | PCM1    | AI205598  | 8p22-p21.3    |
| 205202_at   | 15 | PCMT1   | NM_005389 | 6q24-q25      |
| 208857_s_at | 15 | PCMT1   | M93008    | 6q24-q25      |

|             |    |         |           |                     |
|-------------|----|---------|-----------|---------------------|
| 210156_s_at | 15 | PCMT1   | D25547    | 6q24-q25            |
| 201202_at   | 15 | PCNA    | NM_002592 | 20pter-p12          |
| 217816_s_at | 15 | PCNP    | NM_020357 | 3q12.3              |
| 219295_s_at | 15 | PCOLCE2 | NM_013363 | 3q21-q24            |
| 201933_at   | 15 | PCOLN3  | NM_002768 | 16q24.3             |
| 205549_at   | 15 | PCP4    | NM_006198 | 21q22.2             |
| 222175_s_at | 15 | PCQAP   | AK000003  | 22q11.2             |
| 205559_s_at | 13 | PCSK5   | NM_006200 | 9q21.3              |
| 213652_at   | 10 | PCSK5   | AU152579  | 9q21.3              |
| 207414_s_at | 14 | PCSK6   | NM_002570 | 15q26               |
| 208935_s_at | 15 | pcta-1  | L78132    | 1q42-q43            |
| 207239_s_at | 15 | PCTK1   | NM_006201 | Xp11.3-p11.23       |
| 208823_s_at | 14 | PCTK1   | BE787860  | Xp11.3-p11.23       |
| 208824_x_at | 15 | PCTK1   | BC001048  | Xp11.3-p11.23       |
| 221918_at   | 15 | PCTK2   | AI742210  | 12q23.1             |
| 214797_s_at | 15 | PCTK3   | BC000281  | 1q31-q32            |
| 218676_s_at | 15 | PCTP    | NM_021213 | 17q21-q24           |
| 203803_at   | 12 | PCYOX1  | N45309    | 2p13.3              |
| 204209_at   | 14 | PCYT1A  | AI638771  | ---                 |
| 209577_at   | 15 | PCYT2   | BC000351  | 17q25.3             |
| 202290_at   | 15 | PDAP1   | NM_014891 | 7q22.1              |
| 210907_s_at | 15 | PDCD10  | BC002506  | 3q26.2              |
| 212422_at   | 12 | PDCD11  | AL547263  | 10q24.33            |
| 204025_s_at | 11 | PDCD2   | NM_002598 | 6q27                |
| 213581_at   | 15 | PDCD2   | BF446180  | 6q27                |
| 202730_s_at | 12 | PDCD4   | NM_014456 | 10q24               |
| 202731_at   | 15 | PDCD4   | NM_014456 | 10q24               |
| 212593_s_at | 15 | PDCD4   | AI185160  | 10q24               |
| 212594_at   | 14 | PDCD4   | AI185160  | 10q24               |
| 219275_at   | 15 | PDCD5   | NM_004708 | 19q12-q13.1         |
| 203415_at   | 15 | PDCD6   | NM_013232 | 5pter-p15.2         |
| 217746_s_at | 15 | PDCD6IP | NM_013374 | 3p22.3              |
| 205512_s_at | 15 | PDCD8   | NM_004208 | Xq25-q26            |
| 219043_s_at | 15 | PDCL3   | NM_024065 | 2q12.1              |
| 205501_at   | 15 | PDE10A  | AI143879  | ---                 |
| 208396_s_at | 14 | PDE1A   | NM_005019 | 2q32.1              |
| 207303_at   | 15 | PDE1C   | NM_005020 | 7p15.1-p14.3        |
| 208591_s_at | 11 | PDE3B   | NM_000922 | 11p15.1 /// 11p15.1 |
| 214582_at   | 15 | PDE3B   | NM_000753 | 11p15.1 /// 11p15.1 |
| 204735_at   | 12 | PDE4A   | NM_006202 | 19p13.2             |
| 203708_at   | 15 | PDE4B   | NM_002600 | 1p31                |
| 206792_x_at | 15 | PDE4C   | NM_000923 | 19p13.11            |
| 204491_at   | 15 | PDE4D   | R40917    | 5q12                |
| 210837_s_at | 14 | PDE4D   | AF012074  | 5q12                |
| 205872_x_at | 15 | PDE4DIP | NM_022359 | 1q12                |
| 211751_at   | 11 | PDE4DIP | BC005949  | 1q12 /// 1q12       |
| 212390_at   | 15 | PDE4DIP | AB007923  | 1q12                |
| 213388_at   | 15 | PDE4DIP | H15535    | ---                 |
| 214129_at   | 15 | PDE4DIP | AI821791  | 1q12                |
| 204091_at   | 14 | PDE6D   | NM_002601 | 2q35-q36            |

|             |    |                 |           |               |
|-------------|----|-----------------|-----------|---------------|
| 212521_s_at | 15 | PDE8A           | BE568219  | 15q25.2       |
| 212522_at   | 15 | PDE8A           | W73272    | 15q25.2       |
| 219575_s_at | 15 | PDF             | NM_022341 | 16q22.1       |
| 205463_s_at | 11 | PDGFA           | NM_002607 | 7p22          |
| 204200_s_at | 13 | PDGFB           | NM_002608 | 22q12.3-q13.1 |
| 216061_x_at | 15 | PDGFB           | AK022920  | 22q12.3-q13.1 |
| 218718_at   | 15 | PDGFC           | NM_016205 | 4q32          |
| 203131_at   | 15 | PDGFRA          | NM_006206 | 4q11-q13      |
| 202273_at   | 10 | PDGFRB          | NM_002609 | 5q31-q32      |
| 205226_at   | 12 | PDGFRL          | NM_006207 | 8p22-p21.3    |
| 200980_s_at | 15 | PDHA1           | BF739979  | Xp22.2-p22.1  |
| 208911_s_at | 15 | PDHB            | M34055    | 3p21.1-p14.2  |
| 211023_at   | 15 | PDHB            | AL117618  | 3p21.1-p14.2  |
| 203067_at   | 15 | PDHX            | NM_003477 | 11p13         |
| 208658_at   | 15 | PDIA4           | BC000425  | 7q35          |
| 211048_s_at | 15 | PDIA4           | BC006344  | 7q35 /// 7q35 |
| 203857_s_at | 15 | PDIA5           | NM_006810 | 3q21.1        |
| 207668_x_at | 15 | PDIA6           | NM_005742 | 2p25.1        |
| 208639_x_at | 15 | PDIA6           | BC001312  | 2p25.1        |
| 202590_s_at | 15 | PDK2            | AL574319  | 17q21.33      |
| 221957_at   | 14 | PDK3            | BF939522  | Xp22.13       |
| 205960_at   | 15 | PDK4            | NM_002612 | 7q21.3-q22.1  |
| 208690_s_at | 15 | PDLIM1          | BC000915  | 10q22-q26.3   |
| 219165_at   | 15 | PDLIM2          | NM_021630 | 8p21.2        |
| 210170_at   | 13 | PDLIM3          | BC001017  | 4q35          |
| 211564_s_at | 15 | PDLIM4          | BC003096  | 5q31.1        |
| 203242_s_at | 15 | PDLIM5          | BG054550  | 4q22          |
| 203243_s_at | 15 | PDLIM5          | NM_006457 | 4q22          |
| 212412_at   | 15 | PDLIM5          | AV715767  | 4q22          |
| 213684_s_at | 15 | PDLIM5          | BF671400  | 4q22          |
| 221994_at   | 15 | PDLIM5          | AA196325  | 4q22          |
| 211681_s_at | 11 | PDLIM5; L9; ENH | AF116705  | 4q22 /// 4q22 |
| 203370_s_at | 13 | PDLIM7          | NM_005451 | 5q35.3        |
| 214121_x_at | 15 | PDLIM7          | AA086229  | 5q35.3        |
| 214266_s_at | 10 | PDLIM7          | AW206786  | 5q35.3        |
| 220236_at   | 14 | PDPR            | NM_017990 | 16q22.1       |
| 211663_x_at | 15 | PDS             | M61900    | 9q34.2-q34.3  |
| 202671_s_at | 15 | PDXK            | NM_003681 | 21q22.3       |
| 218018_at   | 15 | PDXK            | AW449022  | 21q22.3       |
| 218019_s_at | 15 | PDXK            | AW449022  | 21q22.3       |
| 212915_at   | 15 | PDZRN3          | AL569804  | 3p14.1        |
| 37950_at    | 15 | PE              | X74496    | 6q22          |
| 200787_s_at | 15 | PEA15           | BC002426  | 1q21.1        |
| 200788_s_at | 15 | PEA15           | NM_003768 | 1q21.1        |
| 208981_at   | 15 | PECAM1          | AA702701  | 17q23         |
| 218025_s_at | 15 | PECI            | NM_006117 | 6p24.3        |
| 217923_at   | 15 | PEF1            | NM_012392 | 1p34          |
| 212092_at   | 13 | PEG10           | BE858180  | 7q21          |
| 212094_at   | 15 | PEG10           | BE858180  | 7q21          |
| 209242_at   | 15 | PEG3            | AL042588  | 19q13.4       |

|             |    |             |           |                       |
|-------------|----|-------------|-----------|-----------------------|
| 209243_s_at | 13 | PEG3        | AF208967  | 19q13.4               |
| 218319_at   | 15 | PEL11       | NM_020651 | 2p13.3                |
| 218472_s_at | 15 | PELO        | NM_015946 | 5q11.2                |
| 215354_s_at | 14 | PELP1       | BC002875  | 17p13.3               |
| 207621_s_at | 15 | PEMT        | NM_007169 | 17p11.2               |
| 218302_at   | 15 | PEN2        | NM_018468 | 19q13.13              |
| 213791_at   | 15 | PENK        | NM_006211 | 8q23-q24 /// 8q23-q24 |
| 202108_at   | 15 | PEPD        | NM_000285 | 19q12-q13.2           |
| 202861_at   | 14 | PER1        | NM_002616 | 17p13.1-17p12         |
| 205251_at   | 15 | PER2        | NM_022817 | 2q37.3                |
| 221811_at   | 10 | PERLD1      | BF033007  | 17q21.2               |
| 55616_at    | 15 | PERLD1      | AI703342  | 17q21.2               |
| 202212_at   | 10 | PES1        | NM_014303 | 22q12.1               |
| 204300_at   | 14 | PET112L     | NM_004564 | 4q27-q28              |
| 204873_at   | 11 | PEX1        | NM_000466 | 7q21-q22              |
| 215023_s_at | 12 | PEX1        | AC000064  | 7q21-q22              |
| 213296_at   | 15 | PEX10       | BF339133  | 1pter-q24             |
| 202658_at   | 15 | PEX11B      | NM_003846 | 1q21.2                |
| 205094_at   | 15 | PEX12       | NM_000286 | 17q21.1               |
| 203503_s_at | 15 | PEX14       | NM_004565 | 1p36.22               |
| 33760_at    | 14 | Pex14       | AB017546  | 1p36.22               |
| 49878_at    | 15 | PEX16       | AA523441  | 11p11.2               |
| 201706_s_at | 15 | PEX19       | BC000496  | 1q22                  |
| 201707_at   | 13 | PEX19       | NM_002857 | 1q22                  |
| 219180_s_at | 12 | PEX26       | AI817074  | 22q11.21              |
| 203970_s_at | 15 | PEX3        | NM_003630 | 6q23-q24              |
| 203972_s_at | 15 | PEX3        | AB035307  | 6q23-q24              |
| 203244_at   | 15 | PEX5        | NM_000319 | 12p13.3               |
| 211033_s_at | 15 | PEX7        | BC006268  | 6q21-q22.2            |
| 206390_x_at | 12 | PF4         | NM_002619 | 4q12-q21              |
| 202259_s_at | 15 | PFAAP5      | NM_014887 | 13q12-q13             |
| 221899_at   | 14 | PFAAP5      | AI809961  | 13q12-q13             |
| 202258_s_at | 15 | PFAAP5      | U50532    | 13q12-q13             |
| 213302_at   | 10 | PFAS        | AL044326  | 17p13.1               |
| 201507_at   | 15 | PFDN1       | NM_002622 | 5q31                  |
| 218336_at   | 15 | PFDN2       | NM_012394 | 1q23.1                |
| 205361_s_at | 15 | PFDN4       | AI718295  | 20q13                 |
| 205362_s_at | 14 | PFDN4       | NM_002623 | 20q13                 |
| 207132_x_at | 15 | PFDN5       | NM_002624 | 12q12                 |
| 202464_s_at | 15 | PFK2; IPFK2 | D49817    | 10p14-p15             |
| 209992_at   | 13 | PFKFB2      | AB044805  | 1q31                  |
| 201102_s_at | 15 | PFKL        | NM_002626 | 21q22.3               |
| 211065_x_at | 15 | PFKL        | BC006422  | 21q22.3 /// 21q22.3   |
| 210976_s_at | 15 | PFKM        | U24183    | 12q13.3               |
| 201037_at   | 15 | PFKP        | NM_002627 | 10p15.3-p15.2         |
| 200634_at   | 15 | PFN1        | NM_005022 | 17p13.3               |
| 204992_s_at | 15 | PFN2        | NM_002628 | 3q25.1-q25.2          |
| 221521_s_at | 14 | Pfs2        | BC003186  | 16q24.1               |
| 204604_at   | 15 | PFTK1       | NM_012395 | 7q21-q22              |



|             |    |         |           |                   |
|-------------|----|---------|-----------|-------------------|
| 201893_x_at | 15 | PG40    | AF138300  | 12q13.2           |
| 211813_x_at | 15 | PG40    | AF138303  | 12q13.2           |
| 211896_s_at | 15 | PG40    | AF138302  | 12q13.2           |
| 200886_s_at | 15 | PGAM1   | NM_002629 | 10q25.3           |
| 205736_at   | 15 | PGAM2   | NM_000290 | 7p13-p12          |
| 213469_at   | 13 | PGAP1   | AV705244  | 2q33.1            |
| 203501_at   | 14 | PGCP    | NM_006102 | 8q22.2 /// 8q22.2 |
| 208454_s_at | 14 | PGCP    | NM_016134 | 8q22.2            |
| 201118_at   | 14 | PGD     | NM_002631 | 1p36.3-p36.13     |
| 206726_at   | 13 | PGDS    | NM_014485 | 4q22.3            |
| 203450_at   | 15 | PGEA1   | NM_015373 | 22q12             |
| 215179_x_at | 15 | PGF     | AK023843  | 14q24-q31         |
| 211571_s_at | 14 | pgH3    | D32039    | 5q14.3            |
| 200737_at   | 15 | PGK1    | NM_000291 | Xq13              |
| 200738_s_at | 15 | PGK1    | NM_000291 | Xq13              |
| 217356_s_at | 15 | PGK1    | S81916    | Xq13              |
| 218387_s_at | 15 | PGLS    | NM_012088 | 19p13.2           |
| 218388_at   | 15 | PGLS    | NM_012088 | 19p13.2           |
| 220944_at   | 15 | PGLYRP4 | NM_020393 | 1q21              |
| 201968_s_at | 15 | PGM1    | NM_002633 | 1p31              |
| 221788_at   | 15 | PGM3    | AI433464  | 6q14.1-q15        |
| 219891_at   | 15 | PGPEP1  | NM_017712 | 19p13.11          |
| 201120_s_at | 15 | PGRMC1  | NM_006667 | Xq22-q24          |
| 201121_s_at | 15 | PGRMC1  | NM_006667 | Xq22-q24          |
| 201701_s_at | 15 | PGRMC2  | NM_006320 | 4q26              |
| 213227_at   | 15 | PGRMC2  | BE879873  | 4q26              |
| 219394_at   | 13 | PGS1    | NM_024419 | 17q25.3           |
| 222125_s_at | 15 | PH-4    | BC000580  | 3p21.31           |
| 204048_s_at | 15 | PHACTR2 | AA551142  | 6q24.1            |
| 204049_s_at | 15 | PHACTR2 | NM_014721 | 6q24.1            |
| 200658_s_at | 15 | PHB     | NM_002634 | 17q21             |
| 200659_s_at | 15 | PHB     | NM_002634 | 17q21             |
| 201600_at   | 15 | PHB2    | NM_007273 | 12p13             |
| 218338_at   | 14 | PHC1    | NM_004426 | 12p13             |
| 200919_at   | 15 | PHC2    | NM_004427 | 1p34.3            |
| 202928_s_at | 13 | PHF1    | NM_024165 | 6p21.3            |
| 40446_at    | 15 | PHF1    | AL021366  | 6p21.3            |
| 219126_at   | 15 | PHF10   | NM_018288 | 6q27              |
| 221786_at   | 15 | PHF10   | BF431618  | 6q27              |
| 221787_at   | 15 | PHF10   | BF431618  | 6q27              |
| 221816_s_at | 15 | PHF11   | BF055474  | 13q14.12          |
| 212660_at   | 14 | PHF15   | AI735639  | 5q31.2            |
| 218517_at   | 14 | PHF17   | NM_024900 | 4q26-q27          |
| 212726_at   | 14 | PHF2    | AB014562  | 9q22.31           |
| 206567_s_at | 10 | PHF20   | NM_016436 | 20q11.22-q11.23   |
| 203278_s_at | 12 | PHF21A  | NM_016621 | 11p11.2           |
| 218616_at   | 15 | PHF22   | NM_020395 | 4q25              |
| 215718_s_at | 11 | PHF3    | AI949220  | 6q12              |
| 217951_s_at | 11 | PHF3    | NM_015153 | 6q12              |
| 217952_x_at | 15 | PHF3    | NM_015153 | 6q12              |

|             |    |        |           |                       |
|-------------|----|--------|-----------|-----------------------|
| 217954_s_at | 15 | PHF3   | NM_015153 | 6q12                  |
| 212916_at   | 14 | PHF8   | AW249934  | Xp11.22               |
| 201397_at   | 15 | PHGDH  | NM_006623 | 1p12                  |
| 212542_s_at | 15 | PHIP   | BF224151  | 6q14                  |
| 213074_at   | 15 | PHIP   | BG545769  | 6q14-q15              |
| 209439_s_at | 14 | PHK    | D38616    | Xp22.2-p22.1          |
| 209438_at   | 12 | PHKA2  | AL096700  | Xp22.2-p22.1          |
| 202738_s_at | 15 | PHKB   | BG149218  | 16q12-q13             |
| 202739_s_at | 15 | PHKB   | NM_000293 | 16q12-q13             |
| 217996_at   | 15 | PHLDA1 | NM_007350 | 12q15                 |
| 217997_at   | 15 | PHLDA1 | NM_007350 | 12q15                 |
| 209674_at   | 15 | PHLL1  | D83702    | 12q23-q24.1           |
| 217226_s_at | 15 | PHOX1  | M95929    | 1q24                  |
| 210191_s_at | 12 | PHTF1  | BC002447  | 1p13                  |
| 209780_at   | 15 | PHTF2  | AL136883  | 7q11.23-q21           |
| 203335_at   | 15 | PHYH   | NM_006214 | 10pter-p11.2          |
| 211429_s_at | 13 | PI     | AF119873  | ---                   |
| 212688_at   | 15 | PI3K   | BC003393  | 3q22.3                |
| 210417_s_at | 13 | PI4Kb  | U81802    | 1q21                  |
| 209345_s_at | 15 | PI4KII | AL561930  | 10q24                 |
| 217862_at   | 15 | PIAS1  | NM_016166 | 15q                   |
| 217863_at   | 15 | PIAS1  | NM_016166 | 15q                   |
| 217864_s_at | 15 | PIAS1  | NM_016166 | 15q                   |
| 203035_s_at | 10 | PIAS3  | NM_006099 | 1q21                  |
| 212881_at   | 15 | PIASY  | AK022481  | 19p13.3               |
| 213239_at   | 15 | PIBF1  | NM_006346 | 13q21.33              |
| 212506_at   | 15 | PICALM | AL135735  | 11q14                 |
| 212511_at   | 14 | PICALM | AI766247  | 11q14                 |
| 215236_s_at | 10 | PICALM | AV721177  | 11q14                 |
| 215832_x_at | 15 | PICALM | AV722190  | 11q14                 |
| 209080_x_at | 15 | PICOT  | AF118652  | 6p25.3                |
| 214205_x_at | 15 | PICOT  | AK022131  | 6p25.3                |
| 210367_s_at | 15 | PIG12  | AF010316  | 9q34.3                |
| 219501_at   | 15 | PIG38  | NM_017993 | 13q14.11              |
| 203491_s_at | 12 | PIG8   | AI123527  | 11q21                 |
| 203492_x_at | 15 | PIG8   | AA918224  | 11q21                 |
| 205281_s_at | 13 | PIGA   | NM_002641 | Xp22.1                |
| 205452_at   | 15 | PIGB   | NM_004855 | 15q21-q22             |
| 214152_at   | 12 | PIGB   | AU144243  | 15q21.1               |
| 202846_s_at | 13 | PIGC   | NM_002642 | 1q23-q25 /// 1q23-q25 |
| 216593_s_at | 10 | PIGCP1 | AB000359  | ---                   |
| 205077_s_at | 15 | PIGF   | NM_002643 | 2p21-p16              |
| 205078_at   | 15 | PIGF   | NM_002643 | 2p21-p16              |
| 212117_at   | 15 | PIGF   | BF978689  | 2p21                  |
| 212120_at   | 15 | PIGF   | BE897886  | 2p21-p16              |
| 212122_at   | 15 | PIGF   | AW771590  | 2p21                  |
| 209625_at   | 14 | PIGH   | BC004100  | 14q11-q24             |
| 205873_at   | 14 | PIGL   | NM_004278 | 17p12-p11.2           |
| 219048_at   | 12 | PIGN   | NM_012327 | 18q21.33              |

|             |    |         |           |               |
|-------------|----|---------|-----------|---------------|
| 209998_at   | 13 | PIGO    | BC001030  | 9p13.2        |
| 213070_at   | 15 | PIK3C2A | AV682436  | 11p15.5-p14   |
| 204484_at   | 13 | PIK3C2B | NM_002646 | 1q32          |
| 204297_at   | 15 | PIK3C3  | NM_002647 | 18q12.3       |
| 204369_at   | 15 | PIK3CA  | NM_006218 | 3q26.3        |
| 212239_at   | 15 | PIK3R1  | AI680192  | 5q13.1        |
| 212240_s_at | 15 | PIK3R1  | AI679268  | 5q13.1        |
| 212249_at   | 13 | PIK3R1  | AI679268  | 5q13.1        |
| 207105_s_at | 15 | PIK3R2  | NM_005027 | 19q13.2-q13.4 |
| 202743_at   | 15 | PIK3R3  | BE622627  | 1p34.1        |
| 212740_at   | 15 | PIK3R4  | BF740111  | 3q22.1        |
| 220566_at   | 13 | PIK3R5  | NM_014308 | 17p13.1       |
| 207081_s_at | 15 | PIK4CA  | NM_002650 | 22q11.21      |
| 206138_s_at | 12 | PIK4CB  | NM_002651 | 1q21          |
| 206139_at   | 15 | PIK4CB  | NM_002651 | 1q21          |
| 220954_s_at | 15 | PILRB   | NM_013440 | 7q22.1        |
| 209193_at   | 15 | PIM1    | M24779    | 6p21.2        |
| 202927_at   | 13 | PIN1    | NM_006221 | 19p13         |
| 204571_x_at | 15 | PIN4    | BE797213  | Xq13          |
| 214224_s_at | 15 | PIN4    | BE674061  | Xq13          |
| 214225_at   | 13 | PIN4    | BE674061  | Xq13          |
| 209018_s_at | 15 | PINK1   | BF432478  | 1p36          |
| 209019_s_at | 15 | PINK1   | BF432478  | 1p36          |
| 207391_s_at | 15 | PIP5K1A | NM_003557 | 1q22-q24      |
| 205632_s_at | 15 | PIP5K1B | NM_003558 | 9q13          |
| 212518_at   | 15 | PIP5K1C | AB011161  | 19p13.3       |
| 205570_at   | 11 | PIP5K2A | NM_005028 | 10p12.32      |
| 201080_at   | 15 | PIP5K2B | BF338509  | ---           |
| 213111_at   | 15 | PIP5K3  | AB023198  | 2q34          |
| 207469_s_at | 15 | PIR     | NM_003662 | Xp22.31       |
| 201190_s_at | 15 | PITPNA  | H15647    | 17p13.3       |
| 201192_s_at | 15 | PITPNA  | NM_006224 | 17p13.3       |
| 202522_at   | 15 | PITPNB  | AL031591  | 22q12.1       |
| 219155_at   | 15 | PITPNC1 | NM_012417 | 17q24.3       |
| 205273_s_at | 14 | PITRM1  | NM_014968 | 10p15.3       |
| 207558_s_at | 10 | PITX2   | NM_000325 | 4q25-q27      |
| 218667_at   | 15 | PJA1    | NM_022368 | Xq13.1        |
| 201133_s_at | 15 | PJA2    | AA142966  | 5q22.1        |
| 202328_s_at | 15 | PKD1    | NM_000296 | 16p13.3       |
| 203688_at   | 15 | PKD2    | NM_000297 | 4q21-q23      |
| 204612_at   | 15 | PKIA    | NM_006823 | 8q21.11       |
| 202732_at   | 15 | PKIG    | NM_007066 | 20q12-q13.1   |
| 201251_at   | 15 | PKM2    | NM_002654 | 15q22         |
| 213700_s_at | 15 | PKM2    | AA554945  | 15q22         |
| 204267_x_at | 15 | PKMYT1  | NM_004203 | 16p13.3       |
| 202161_at   | 12 | PKN1    | NM_002741 | 19p13.1-p12   |
| 212628_at   | 15 | PKN2    | BG292065  | 1p22.2        |
| 212629_s_at | 13 | PKN2    | AI633689  | 1p22.2        |
| 54051_at    | 13 | PKNOX1  | H59033    | 21q22.3       |
| 63305_at    | 14 | PKNOX2  | D81792    | ---           |

|             |    |          |           |                 |
|-------------|----|----------|-----------|-----------------|
| 207717_s_at | 15 | PKP2     | NM_004572 | 12p11           |
| 201928_at   | 15 | PKP4     | AA194254  | 2q23-q31        |
| 201929_s_at | 15 | PKP4     | NM_003628 | 2q23-q31        |
| 216267_s_at | 10 | PL6      | BF034906  | 3p21.3          |
| 221027_s_at | 14 | PLA2G12A | NM_030821 | 4q25 /// 4q25   |
| 203649_s_at | 13 | PLA2G2A  | NM_000300 | 1p35            |
| 219095_at   | 14 | PLA2G4B  | NM_005090 | 15q11.2-q21.3   |
| 60528_at    | 15 | PLA2G4B  | N71116    | 15q11.2-q21.3   |
| 206178_at   | 15 | PLA2G5   | NM_000929 | 1p36-p34        |
| 215870_s_at | 15 | PLA2G5   | AL158172  | 1p36-p34        |
| 204691_x_at | 14 | PLA2G6   | NM_003560 | 22q13.1         |
| 210647_x_at | 15 | PLA2G6   | AF102988  | 22q13.1         |
| 206214_at   | 13 | PLA2G7   | NM_005084 | 6p21.2-p12      |
| 209533_s_at | 14 | PLA2P    | AF145020  | 9p21            |
| 219702_at   | 10 | PLAC1    | NM_021796 | Xq26            |
| 219014_at   | 15 | PLAC8    | NM_016619 | 4q21.3          |
| 205372_at   | 15 | PLAG1    | NM_002655 | 8q12            |
| 207002_s_at | 15 | PLAGL1   | NM_002656 | 6q24-q25        |
| 207943_x_at | 14 | PLAGL1   | NM_006718 | 6q24-q25        |
| 209318_x_at | 15 | PLAGL1   | BG547855  | 6q24-q25        |
| 202924_s_at | 12 | PLAGL2   | AF006005  | 20q11.21        |
| 201860_s_at | 15 | PLAT     | NM_000930 | 8p12            |
| 205479_s_at | 12 | PLAU     | NM_002658 | 10q24           |
| 211668_s_at | 14 | PLAU     | K03226    | 10q24 /// 10q24 |
| 204938_s_at | 15 | PLB      | M60411    | 6q22.1          |
| 213222_at   | 15 | PLCB1    | AL049593  | 20p12           |
| 203895_at   | 15 | PLCB4    | AL535113  | 20p12           |
| 203896_s_at | 15 | PLCB4    | AL535113  | 20p12           |
| 205111_s_at | 14 | PLCE1    | NM_016341 | 10q23           |
| 205112_at   | 13 | PLCE1    | NM_016341 | 10q23           |
| 214159_at   | 10 | PLCE1    | AW771015  | 10q23           |
| 216218_s_at | 15 | PLCE2    | AK023546  | 3p25.1-p24.3    |
| 204613_at   | 15 | PLCG2    | NM_002661 | 16q24.1         |
| 205934_at   | 15 | PLCL1    | NM_006226 | 2q33            |
| 213309_at   | 15 | PLCL2    | AL117515  | 3p25.1-p24.3    |
| 218951_s_at | 13 | PLCXD1   | NM_018390 | Xp22.33         |
| 177_at      | 13 | PLD1     | U38545    | 3q26            |
| 201050_at   | 15 | PLD3     | NM_012268 | 19q13.2         |
| 201373_at   | 12 | PLEC1    | NM_000445 | 8q24            |
| 219024_at   | 14 | PLEKHA1  | NM_021622 | 10q26.13        |
| 214989_x_at | 15 | PLEKHA5  | BC000969  | 12p12           |
| 220952_s_at | 15 | PLEKHA5  | NM_019012 | 12p12           |
| 201410_at   | 15 | PLEKHB2  | AI983043  | 2q21.2          |
| 201411_s_at | 13 | PLEKHB2  | NM_017958 | 2q21.2          |
| 209209_s_at | 15 | PLEKHC1  | AW469573  | 14q22.1         |
| 214212_x_at | 15 | PLEKHC1  | AI928241  | 14q22.1         |
| 212719_at   | 15 | PLEKHE1  | AB011178  | 18q21.33        |
| 218640_s_at | 15 | PLEKHF2  | BF439250  | 8q22.1          |
| 218290_at   | 15 | PLEKHJ1  | NM_018049 | 19p13.3         |
| 218223_s_at | 15 | PLEKHO1  | NM_016274 | 1q21.3          |

|             |    |         |           |               |
|-------------|----|---------|-----------|---------------|
| 202240_at   | 10 | PLK1    | NM_005030 | 16p12.3       |
| 201939_at   | 15 | PLK2    | NM_006622 | 5q12.1-q13.2  |
| 204887_s_at | 10 | PLK4    | NM_014264 | 4q27-q28      |
| 204939_s_at | 15 | PLN     | NM_002667 | 6q22.1        |
| 204940_at   | 15 | PLN     | NM_002667 | 6q22.1        |
| 200827_at   | 15 | PLOD1   | NM_000302 | 1p36.3-p36.2  |
| 202619_s_at | 15 | PLOD2   | AI754404  | 3q23-q24      |
| 202620_s_at | 15 | PLOD2   | NM_000935 | 3q23-q24      |
| 202185_at   | 15 | PLOD3   | NM_001084 | 7q22          |
| 210198_s_at | 15 | PLP1    | BC002665  | Xq22          |
| 201136_at   | 15 | PLP2    | NM_002668 | Xp11.23       |
| 201215_at   | 15 | PLS3    | NM_005032 | Xq24          |
| 202430_s_at | 15 | PLSCR1  | NM_021105 | 3q23          |
| 202446_s_at | 15 | PLSCR1  | AI825926  | 3q23          |
| 56197_at    | 15 | PLSCR3  | AI783924  | ---           |
| 218901_at   | 15 | PLSCR4  | NM_020353 | 3q24          |
| 202075_s_at | 15 | PLTP    | NM_006227 | 20q12-q13.1   |
| 214081_at   | 14 | PLXDC1  | AF070526  | 17q21.1       |
| 219700_at   | 15 | PLXDC1  | NM_020405 | 17q21.1       |
| 221537_at   | 14 | PLXNA1  | T16388    | 3q21.3        |
| 221538_s_at | 11 | PLXNA1  | T16388    | 3q21.3        |
| 213030_s_at | 13 | PLXNA2  | AI688418  | 1q32.2        |
| 208890_s_at | 13 | PLXNB2  | BC004542  | 22q13.33      |
| 38671_at    | 15 | PLXND1  | AB014520  | 3q21.3        |
| 217225_x_at | 15 | PM5     | AL512687  | 16p13.11      |
| 49077_at    | 15 | PME-1   | AL040538  | 11q13.3       |
| 202337_at   | 15 | PMF1    | NM_007221 | 1q12          |
| 209640_at   | 14 | PML     | M79462    | 15q22         |
| 203467_at   | 15 | PMM1    | NM_002676 | 22q13.2       |
| 203201_at   | 11 | PMM2    | NM_000303 | 16p13.3-p13.2 |
| 212088_at   | 15 | PMPCA   | BF570122  | 9q34.3        |
| 201682_at   | 15 | PMPCB   | NM_004279 | 7q22-q32      |
| 213677_s_at | 15 | PMS1    | BG434893  | 2q31-q33      |
| 215667_x_at | 15 | PMS2L1  | AI375694  | 7q22.1        |
| 214756_x_at | 15 | PMS2L13 | AB017004  | 7q22.1        |
| 215412_x_at | 14 | PMS2L16 | AB017007  | 7q22.1        |
| 214473_x_at | 15 | PMS2L3  | NM_005395 | 7q11.23       |
| 203515_s_at | 15 | PMVK    | NM_006556 | 1p13-q23      |
| 222158_s_at | 15 | PNAS-4  | AF229834  | 1q44          |
| 212371_at   | 15 | PNAS-4  | AL049397  | 1q44          |
| 218961_s_at | 15 | PNKP    | NM_007254 | 19q13.3-q13.4 |
| 218224_at   | 15 | PNMA1   | NM_006029 | 14q24.2       |
| 209598_at   | 12 | PNMA2   | AB020690  | 8p21.1        |
| 210183_x_at | 15 | PNN     | AF112222  | 15q15.1       |
| 212036_s_at | 15 | PNN     | AW152664  | 14q13.3       |
| 212037_at   | 15 | PNN     | BF508848  | 14q13.3       |
| 212705_x_at | 11 | PNPLA2  | BF570210  | 11p15.5       |
| 217779_s_at | 15 | PNRC2   | NM_017761 | 1p36.11       |
| 201578_at   | 15 | PODXL   | NM_005397 | 7q32-q33      |
| 212349_at   | 11 | POFUT1  | AL045513  | 20q11         |

|             |    |         |           |                 |
|-------------|----|---------|-----------|-----------------|
| 218229_s_at | 14 | POGK    | NM_017542 | 1q23.3          |
| 212153_at   | 15 | POGZ    | AB007930  | 1q21.3          |
| 204835_at   | 12 | POLA    | NM_016937 | Xp22.1-p21.3    |
| 203616_at   | 15 | POLB    | NM_002690 | 8p11.2          |
| 201115_at   | 15 | POLD2   | NM_006230 | 7p13            |
| 212836_at   | 15 | POLD3   | D26018    | 11q14           |
| 202996_at   | 10 | POLD4   | NM_021173 | 11q13           |
| 217806_s_at | 15 | POLDIP2 | NM_015584 | 17q11.2         |
| 212100_s_at | 15 | POLDIP3 | Z93241    | 22q13.31        |
| 215357_s_at | 13 | POLDIP3 | Z93241    | 22q13.31        |
| 205909_at   | 11 | POLE2   | NM_002692 | 14q21-q22       |
| 208828_at   | 15 | POLE3   | BC004170  | 9q33            |
| 203366_at   | 13 | POLG    | NM_002693 | 15q25           |
| 213007_at   | 14 | POLG    | W74442    | 15q25           |
| 205811_at   | 15 | POLG2   | NM_007215 | 17q             |
| 219317_at   | 15 | POLI    | NM_007195 | 18q21.1         |
| 220113_x_at | 11 | POLR1B  | NM_019014 | 2q13            |
| 207515_s_at | 15 | POLR1C  | NM_004875 | 6p21.1          |
| 218258_at   | 15 | POLR1D  | NM_015972 | 13q12.2         |
| 202725_at   | 14 | POLR2A  | NM_000937 | 17p13.1         |
| 201803_at   | 15 | POLR2B  | NM_000938 | 4q12            |
| 208996_s_at | 15 | POLR2C  | BC000409  | 16q13-q21       |
| 203664_s_at | 14 | POLR2D  | NM_004805 | 2q21            |
| 214144_at   | 11 | POLR2D  | BF432147  | 2q21            |
| 213887_s_at | 15 | POLR2E  | AI554759  | 19p13.3         |
| 217854_s_at | 15 | POLR2E  | BC004441  | 19p13.3         |
| 209511_at   | 15 | POLR2F  | BC003582  | 22q13.1         |
| 202306_at   | 15 | POLR2G  | NM_002696 | 11q13.1         |
| 209302_at   | 15 | POLR2H  | U37689    | 3q28            |
| 212955_s_at | 15 | POLR2I  | AL037557  | 19q12           |
| 212782_x_at | 15 | POLR2J  | BG335629  | 7q11.2          |
| 216242_x_at | 15 | POLR2J2 | AW402635  | 7               |
| 202634_at   | 15 | POLR2K  | AL558030  | 8q22.3          |
| 202635_s_at | 15 | POLR2K  | NM_005034 | 8q22.3          |
| 211730_s_at | 15 | POLR2L  | BC005903  | 11p15 /// 11p15 |
| 219459_at   | 15 | POLR3B  | NM_018082 | 12q24.11        |
| 210573_s_at | 15 | POLR3C  | BC004424  | 1q21.2          |
| 208361_s_at | 15 | POLR3D  | NM_001722 | 8q21            |
| 218016_s_at | 15 | POLR3E  | NM_018119 | 16p12.3         |
| 205218_at   | 12 | POLR3F  | NM_006466 | 20p11.23        |
| 206653_at   | 10 | POLR3G  | BF062139  | 5q14.3          |
| 218866_s_at | 15 | POLR3K  | AF060223  | 16p13.3         |
| 202466_at   | 15 | POLS    | NM_006999 | 5p15            |
| 213893_x_at | 15 | POM121  | AA161026  | ---             |
| 217944_at   | 15 | POMGNT1 | NM_017739 | 1p34.1          |
| 218476_at   | 15 | POMT1   | NM_007171 | 9q34.1          |
| 210910_s_at | 15 | POMZP3  | BC000487  | 7q11.23         |
| 201876_at   | 15 | PON2    | NM_000305 | 7q21.3          |
| 210830_s_at | 15 | PON2    | AF001602  | 7q21.3          |
| 202868_s_at | 15 | POP4    | NM_006627 | 19q13.11        |

|             |    |                  |           |             |
|-------------|----|------------------|-----------|-------------|
| 204839_at   | 15 | POP5             | NM_015918 | 12q24.31    |
| 209482_at   | 15 | POP7             | BC001430  | 7q22        |
| 219647_at   | 15 | POPDC2           | NM_022135 | 3q13.33     |
| 219926_at   | 15 | POPDC3           | NM_022361 | 6q21        |
| 211967_at   | 15 | PORIMIN          | BG538627  | 11q22.1     |
| 204353_s_at | 15 | POT1             | BC002923  | 7q31.33     |
| 204354_at   | 15 | POT1             | NM_015450 | 7q31.33     |
| 32502_at    | 14 | PP1665           | AL041124  | 11q13.3     |
| 210444_at   | 13 | PP2; Y2B; NPY1RL | U59431    | 5q31        |
| 213305_s_at | 14 | PP2A             | L42375    | 14q32       |
| 635_s_at    | 12 | PP2A             | L42374    | 11q12-q13   |
| 209296_at   | 15 | PP2CB            | AF136972  | 2p22.1      |
| 205761_s_at | 13 | PP35             | AW242981  | 7q22-q31    |
| 209278_s_at | 12 | PP5; TFPI-2      | L27624    | 7q22        |
| 212541_at   | 13 | PP591            | AL562282  | 1q22        |
| 209927_s_at | 15 | pp7704           | AF261137  | 1q22        |
| 212199_at   | 15 | PP784            | AL566962  | 4p16.1      |
| 217848_s_at | 15 | PPA1             | NM_021129 | 10q11.1-q24 |
| 220741_s_at | 15 | PPA2             | NM_006903 | 4q25        |
| 212226_s_at | 15 | PPAP2B           | AA628586  | 1pter-p22.1 |
| 212230_at   | 15 | PPAP2B           | AV725664  | 1pter-p22.1 |
| 203497_at   | 15 | PPARBP           | NM_004774 | 17q12-q21.1 |
| 219195_at   | 15 | PPARGC1A         | NM_013261 | 4p15.1      |
| 214146_s_at | 15 | PPBP             | R64130    | 4q12-q13    |
| 218341_at   | 15 | PPCS             | NM_024664 | 1p34.1      |
| 202065_s_at | 11 | PPFIA1           | NM_003626 | 11q13.2     |
| 202066_at   | 15 | PPFIA1           | AA195259  | 11q13.2     |
| 210235_s_at | 14 | PPFIA1           | U22815    | 11q13.2     |
| 210236_at   | 10 | PPFIA1           | U22815    | 11q13.2     |
| 214978_s_at | 12 | PPFIA4           | AK023365  | 1q32.1      |
| 203735_x_at | 15 | PPFIBP1          | N35896    | 12p12.1     |
| 214375_at   | 13 | PPFIBP1          | AI962377  | 12p12.1     |
| 200661_at   | 15 | PPGB             | NM_000308 | 20q13.1     |
| 201293_x_at | 15 | PPIA             | NM_021130 | 7p13-p11.2  |
| 211378_x_at | 15 | PPIA             | BC001224  | ---         |
| 211765_x_at | 15 | PPIA             | BC005982  | 7p13-p11.2  |
| 211978_x_at | 15 | PPIA             | AI708767  | 7p13-p11.2  |
| 217346_at   | 13 | PPIA             | AL021395  | ---         |
| 212661_x_at | 15 | PPIAL3           | BE731738  | 21q21.1     |
| 200967_at   | 15 | PPIB             | NM_000942 | 15q21-q22   |
| 200968_s_at | 15 | PPIB             | NM_000942 | 15q21-q22   |
| 204517_at   | 15 | PPIC             | BE962749  | 5q23.2      |
| 204518_s_at | 15 | PPIC             | NM_000943 | 5q23.2      |
| 204185_x_at | 15 | PPID             | NM_005038 | 4q31.3      |
| 204186_s_at | 15 | PPID             | AI014573  | 4q31.3      |
| 202494_at   | 14 | PPIE             | NM_006112 | 1p32        |
| 201489_at   | 15 | PPIF             | BC005020  | 10q22-q23   |
| 201490_s_at | 13 | PPIF             | NM_005729 | 10q22-q23   |
| 208994_s_at | 15 | PPIG             | AI638762  | 2q31.1      |
| 204228_at   | 15 | PPIH             | NM_006347 | 1p34.1      |

|             |    |          |           |               |
|-------------|----|----------|-----------|---------------|
| 203966_s_at | 15 | PPM1A    | NM_021003 | 14q23.1       |
| 213225_at   | 15 | PPM1B2   | AJ271832  | 2p22.1        |
| 204566_at   | 15 | PPM1D    | NM_003620 | 17q23.3       |
| 203063_at   | 15 | PPM1F    | NM_014634 | 22q11.22      |
| 200913_at   | 13 | PPM1G    | NM_002707 | 2p23.3        |
| 200885_at   | 15 | PPM1J    | NM_005167 | 1p13.1        |
| 218273_s_at | 13 | PPM2C    | NM_018444 | 8q22.1        |
| 217841_s_at | 14 | PPME1    | NM_016147 | 11q13.3       |
| 208644_at   | 15 | PPOL     | M32721    | 1q41-q42      |
| 204788_s_at | 15 | PPOX     | NM_000309 | 1q22          |
| 200846_s_at | 15 | PPP1CA   | NM_002708 | 11q13         |
| 201407_s_at | 15 | PPP1CB   | AI186712  | 2p23          |
| 201408_at   | 15 | PPP1CB   | W67887    | 2p23          |
| 201409_s_at | 15 | PPP1CB   | W67887    | 2p23          |
| 200726_at   | 15 | PPP1CC   | NM_002710 | 12q24.1-q24.2 |
| 201703_s_at | 10 | PPP1R10  | NM_002714 | 6p21.3        |
| 201500_s_at | 15 | PPP1R11  | NM_021959 | 6p21.3        |
| 201602_s_at | 14 | PPP1R12A | NM_002480 | 12q15-q21     |
| 201603_at   | 15 | PPP1R12A | AI817061  | 12q15-q21     |
| 201604_s_at | 15 | PPP1R12A | NM_002480 | 12q15-q21     |
| 201958_s_at | 12 | PPP1R12B | NM_002481 | 1q32.1        |
| 218849_s_at | 11 | PPP1R13L | NM_006663 | 19q13.32      |
| 202014_at   | 15 | PPP1R15A | NM_014330 | 19q13.2       |
| 205478_at   | 15 | PPP1R1A  | NM_006741 | 12q13.13      |
| 202165_at   | 15 | PPP1R2   | BF966540  | 3q29          |
| 202166_s_at | 15 | PPP1R2   | NM_006241 | 3q29          |
| 204284_at   | 15 | PPP1R3C  | N26005    | 10q23-q24     |
| 201214_s_at | 15 | PPP1R7   | NM_002712 | 2q37.3        |
| 213465_s_at | 15 | PPP1R7   | BF718769  | 2q37.3        |
| 207830_s_at | 15 | PPP1R8   | NM_002713 | 1p35          |
| 221088_s_at | 13 | PPP1R9A  | NM_017650 | 7q21.3        |
| 208652_at   | 15 | PPP2CA   | BC000400  | 5q23-q31      |
| 215628_x_at | 15 | PPP2CA   | AL049285  | ---           |
| 201375_s_at | 15 | PPP2CB   | NM_004156 | 8p12-p11.2    |
| 200695_at   | 15 | PPP2R1A  | NM_014225 | 19q13.41      |
| 202313_at   | 15 | PPP2R2A  | NM_002717 | 8p21.1        |
| 213849_s_at | 14 | PPP2R2B  | AA974416  | 5q31-5q32     |
| 207749_s_at | 15 | PPP2R3A  | NM_002718 | 3q22.1        |
| 209632_at   | 14 | PPP2R3A  | AI760130  | 3q22.1        |
| 219264_s_at | 15 | PPP2R3B  | NM_013239 | Xp22.33       |
| 206452_x_at | 14 | PPP2R4   | NM_021131 | 9q34          |
| 208874_x_at | 15 | PPP2R4   | BC002545  | 9q34          |
| 216105_x_at | 14 | PPP2R4   | X86428    | 9q34          |
| 202187_s_at | 15 | PPP2R5A  | NM_006243 | 1q32.2-q32.3  |
| 201877_s_at | 15 | PPP2R5C  | NM_002719 | 14q32         |
| 214083_at   | 15 | PPP2R5C  | AW772123  | 14q32         |
| 202513_s_at | 15 | PPP2R5D  | NM_006245 | 6p21.1        |
| 203338_at   | 15 | PPP2R5E  | NM_006246 | 14q23.1       |
| 202425_x_at | 14 | PPP3CA   | NM_000944 | 4q21-q24      |
| 202429_s_at | 15 | PPP3CA   | AL353950  | 4q21-q24      |



|             |    |                |           |                     |
|-------------|----|----------------|-----------|---------------------|
| 202457_s_at | 15 | PPP3CA         | AA911231  | 4q21-q24            |
| 202432_at   | 15 | PPP3CB         | NM_021132 | 10q21-q22           |
| 207000_s_at | 14 | PPP3CC         | NM_005605 | 8p21.2              |
| 32540_at    | 13 | PPP3CC         | AI762547  | 8p21.2              |
| 204506_at   | 14 | PPP3R1         | AL544951  | 2p15                |
| 204507_s_at | 10 | PPP3R1         | NM_000945 | 2p15                |
| 201594_s_at | 15 | PPP4R1         | NM_005134 | 18p11.22            |
| 222288_at   | 13 | PPP4R2         | AI004009  | ---                 |
| 203529_at   | 15 | PPP6C          | NM_016294 | 9q34.11 /// 9q34.11 |
| 206174_s_at | 15 | PPP6C          | NM_002721 | 9q34.11             |
| 200975_at   | 15 | PPT1           | NM_000310 | 1p32                |
| 209490_s_at | 14 | PPT2           | AF020543  | 6p21.3              |
| 209826_at   | 15 | PPT2           | AF020544  | 6p21.3              |
| 207769_s_at | 15 | PQBP1          | NM_005710 | Xp11.23             |
| 218208_at   | 15 | PQLC1          | NM_025078 | 18q23               |
| 209633_at   | 15 | PR72           | AL389975  | 3q22.1              |
| 218997_at   | 15 | PRAF1          | NM_022490 | 9p13.1              |
| 203456_at   | 14 | PRAF2          | NM_007213 | Xp11.23             |
| 218009_s_at | 15 | PRC1           | NM_003981 | 15q26.1             |
| 208938_at   | 14 | PRCC           | BC004913  | 1q21.1              |
| 201494_at   | 15 | PRCP           | NM_005040 | 11q14               |
| 219515_at   | 13 | PRDM10         | NM_020228 | 11q25               |
| 203057_s_at | 15 | PRDM2          | AV724783  | 1p36                |
| 205277_at   | 15 | PRDM2          | NM_012231 | 1p36                |
| 218329_at   | 14 | PRDM4          | NM_012406 | 12q23-q24.1         |
| 49485_at    | 15 | PRDM4          | W22625    | 12q23-q24.1         |
| 201619_at   | 15 | PRDX3          | NM_006793 | 10q25-q26           |
| 201923_at   | 15 | PRDX4          | NM_006406 | Xp22.13             |
| 200844_s_at | 15 | PRDX6          | BE869583  | 1q24.2              |
| 200845_s_at | 15 | PRDX6          | BE869583  | 1q24.2              |
| 217861_s_at | 15 | PREB           | NM_013388 | 2p23.3              |
| 202918_s_at | 15 | PREI3          | AF151853  | 2q33.1              |
| 202919_at   | 15 | PREI3          | NM_015387 | 2q33.1              |
| 37022_at    | 11 | PRELP          | U41344    | 1q32                |
| 204117_at   | 11 | PREP           | NM_002726 | 6q22                |
| 221883_at   | 12 | PREP1; pkonx1c | AA133342  | 21q22.3             |
| 201858_s_at | 15 | PRG1           | J03223    | 10q22.1             |
| 201859_at   | 15 | PRG1           | NM_002727 | 10q22.1             |
| 205053_at   | 15 | PRIM1          | NM_000946 | 12q13               |
| 215336_at   | 11 | PRKA11         | AK002166  | 13q13.3             |
| 202801_at   | 15 | PRKACA         | NM_002730 | 19p13.1             |
| 202741_at   | 15 | PRKACB         | AA130247  | 1p36.1              |
| 202742_s_at | 15 | PRKACB         | NM_002731 | 1p36.1              |
| 201805_at   | 15 | PRKAG1         | NM_002733 | 12q12-q14           |
| 218292_s_at | 15 | PRKAG2         | AF087875  | 7q35-q36            |
| 200604_s_at | 15 | PRKAR1A        | M18468    | 17q23-q24           |
| 200605_s_at | 15 | PRKAR1A        | NM_002734 | 17q23-q24           |
| 204842_x_at | 14 | PRKAR2A        | BC002763  | 3p21.3-p21.2        |
| 213052_at   | 14 | PRKAR2A        | BF246917  | 3p21.3-p21.2        |
| 203680_at   | 15 | PRKAR2B        | NM_002736 | 7q22-q31.1          |

|             |    |           |           |               |
|-------------|----|-----------|-----------|---------------|
| 213093_at   | 14 | PRKCA     | AI471375  | 17q22-q23.2   |
| 209685_s_at | 11 | PRKCB1    | M13975    | 16p11.2       |
| 209048_s_at | 15 | PRKCBP1   | AB032951  | 20q13.13      |
| 209049_s_at | 15 | PRKCBP1   | BC001004  | 20q13.13      |
| 213010_at   | 15 | PRKCDBP   | AI088622  | 11p15.4       |
| 206099_at   | 12 | PRKCH     | NM_006255 | 14q22-q23     |
| 218764_at   | 15 | PRKCH     | NM_024064 | 14q22-q23     |
| 209678_s_at | 15 | PRKCI     | L18964    | 3q26.3        |
| 213518_at   | 15 | PRKCI     | AI689429  | 3q26.3        |
| 200707_at   | 14 | PRKCSH    | NM_002743 | 19p13.1-p13.2 |
| 214080_x_at | 15 | PRKCSH    | AI815793  | 19p13.1-p13.2 |
| 205880_at   | 15 | PRKD1     | NM_002742 | 14q11         |
| 38269_at    | 15 | PRKD2     | AL050147  | 19q13.2       |
| 218236_s_at | 15 | PRKD3     | NM_005813 | 2p21          |
| 218378_s_at | 14 | PRKRIP1   | NM_024653 | 7q22.1        |
| 39313_at    | 14 | PRKWNK1   | AB002342  | 12p13.3       |
| 206279_at   | 10 | PRKY      | NM_002760 | Yp11.2        |
| 221443_x_at | 12 | PRLH      | NM_015893 | 2q37.3        |
| 213320_at   | 14 | PRMT3     | AL551971  | 11p15.1       |
| 222106_at   | 14 | PRND      | AL133396  | 20pter-p12    |
| 201300_s_at | 15 | PRNP      | NM_000311 | 20pter-p12    |
| 215707_s_at | 15 | PRNP      | AV725328  | 20pter-p12    |
| 208973_at   | 13 | PRNPIP    | BC001072  | 1p32          |
| 212872_s_at | 15 | PRO0213   | AK023092  | 6p21.1        |
| 219599_at   | 12 | PRO1843   | NM_018507 | 12q13.13      |
| 220943_s_at | 12 | PRO1853   | NM_018607 | 2p22.3        |
| 222231_s_at | 15 | PRO1855   | AK025328  | 17q21.33      |
| 201934_at   | 15 | PRO2730   | N92524    | 3p21.31       |
| 203650_at   | 15 | PROCR     | NM_006404 | 20q11.2       |
| 204304_s_at | 15 | PROM1     | NM_006017 | 4p15.33       |
| 207808_s_at | 15 | PROS1     | NM_000313 | 3p11-q11.2    |
| 210759_s_at | 15 | pros-30   | M64992    | 11p15.1       |
| 209384_at   | 15 | PROSC     | AA176833  | 8p11.2        |
| 209385_s_at | 15 | PROSC     | AA176833  | 8p11.2        |
| 209535_s_at | 12 | proto-LBC | AF127481  | 15q24-q25     |
| 207401_at   | 12 | PROX1     | NM_002763 | 1q32.2-q32.3  |
| 40465_at    | 14 | prp28     | AF026402  | 12q13.12      |
| 221547_at   | 15 | PRPF18    | BC000794  | 10p14         |
| 203103_s_at | 13 | PRPF19    | NM_014502 | 11q12.2       |
| 202251_at   | 15 | PRPF3     | NM_004698 | 1q21.1        |
| 202408_s_at | 15 | PRPF31    | NM_015629 | 19q13.42      |
| 218040_at   | 15 | PRPF38B   | NM_018061 | 1p13.3        |
| 220553_s_at | 14 | PRPF39    | NM_018333 | 14q21.3       |
| 209161_at   | 14 | PRPF4     | AI184802  | 9q31-q33      |
| 209162_s_at | 12 | PRPF4     | AI184802  | 9q31-q33      |
| 202126_at   | 15 | PRPF4B    | AA156948  | 6p25.1        |
| 202127_at   | 15 | PRPF4B    | AB011108  | 6p25.1        |
| 200000_s_at | 15 | PRPF8     | NM_006445 | 17p13.3       |
| 208447_s_at | 15 | PRPS1     | NM_002764 | Xq21-q27      |
| 209440_at   | 15 | PRPS1     | BC001605  | Xq21-q27      |

|             |    |                                                  |           |                     |
|-------------|----|--------------------------------------------------|-----------|---------------------|
| 203401_at   | 14 | PRPS2                                            | NM_002765 | Xp22.3-p22.2        |
| 202529_at   | 15 | PRPSAP1                                          | NM_002766 | 17q24-q25           |
| 203537_at   | 15 | PRPSAP2                                          | NM_002767 | 17p11.2-p12         |
| 219392_x_at | 13 | PRR11                                            | NM_018304 | 17q23.2             |
| 205618_at   | 15 | PRRG1                                            | NM_000950 | Xp21.1              |
| 205991_s_at | 15 | PRRX1                                            | NM_006902 | 1q24                |
| 201185_at   | 15 | PRSS11                                           | NM_002775 | 10q26.3             |
| 209017_s_at | 15 | PRSS15                                           | U02389    | 19p13.2             |
| 202458_at   | 13 | PRSS23                                           | NM_007173 | 11q14.1             |
| 203089_s_at | 15 | PRSS25                                           | NM_013247 | 2p12                |
| 217269_s_at | 11 | PRSS7                                            | AP001672  | ---                 |
| 209599_s_at | 11 | PRUNE                                            | AI762105  | 1q21                |
| 201455_s_at | 15 | PSA; MP100                                       | AJ132583  | 17q21               |
| 200866_s_at | 15 | PSAP                                             | M32221    | 10q21-q22           |
| 200871_s_at | 15 | PSAP                                             | NM_002778 | 10q21-q22           |
| 221619_s_at | 15 | PSAP; CGI-64                                     | AF189289  | 6pter-p24.1         |
| 218271_s_at | 15 | PSARL                                            | NM_018622 | 3q27.3              |
| 202880_s_at | 14 | PSCD1                                            | NM_004762 | 17q25               |
| 209158_s_at | 15 | PSCD2                                            | BC004361  | 19q13.3             |
| 219183_s_at | 11 | PSCD4                                            | NM_013385 | 22q12.3-q13.1       |
| 203354_s_at | 12 | PSD3                                             | NM_015310 | 8pter-p23.3         |
| 203355_s_at | 15 | PSD3                                             | NM_015310 | 8pter-p23.3         |
| 218613_at   | 15 | PSD3                                             | NM_018422 | 8p22                |
| 203460_s_at | 15 | PSEN1                                            | NM_007318 | 14q24.3             |
| 217368_at   | 14 | pseudog 1 for mitoch ATP synthase c subunit (P2) | X69909    | ---                 |
| 206102_at   | 15 | PSF1                                             | NM_021067 | 20p11.21            |
| 205961_s_at | 15 | PSIP1                                            | NM_004682 | 9p22.2 /// 9p22.2   |
| 222286_at   | 10 | PSIP1                                            | R43279    | 9p22.2              |
| 201676_x_at | 15 | PSMA1                                            | NM_002786 | 11p15.1             |
| 211746_x_at | 15 | PSMA1                                            | BC005932  | 11p15.1 /// 11p15.1 |
| 201316_at   | 15 | PSMA2                                            | AL523904  | 7p13                |
| 201317_s_at | 15 | PSMA2                                            | NM_002787 | 7p13                |
| 201532_at   | 15 | PSMA3                                            | NM_002788 | 14q23               |
| 203396_at   | 15 | PSMA4                                            | NM_002789 | 15q24.1             |
| 201274_at   | 15 | PSMA5                                            | NM_002790 | 1p13                |
| 208805_at   | 15 | PSMA6                                            | BC002979  | 14q13               |
| 201114_x_at | 15 | PSMA7                                            | NM_002792 | 20q13.33            |
| 216088_s_at | 15 | PSMA7                                            | AL078633  | 20q13.33            |
| 200876_s_at | 15 | PSMB1                                            | NM_002793 | 6q27                |
| 214288_s_at | 15 | PSMB1                                            | W86293    | 6q27                |
| 202659_at   | 15 | PSMB10                                           | NM_002801 | 16q22.1             |
| 200039_s_at | 15 | PSMB2                                            | BC000268  | 1p34.2              |
| 201400_at   | 15 | PSMB3                                            | NM_002795 | 17q12               |
| 202243_s_at | 15 | PSMB4                                            | NM_002796 | 1q21                |
| 202244_at   | 15 | PSMB4                                            | NM_002796 | 1q21                |
| 208799_at   | 15 | PSMB5                                            | BC004146  | 14q11.2 /// 14q11.2 |
| 208827_at   | 15 | PSMB6                                            | BC000835  | 17p13               |
| 200786_at   | 15 | PSMB7                                            | NM_002799 | 9q34.11-q34.12      |
| 204279_at   | 15 | PSMB9                                            | NM_002800 | 6p21.3              |

|             |    |        |           |                 |
|-------------|----|--------|-----------|-----------------|
| 204219_s_at | 15 | PSMC1  | NM_002802 | 14q32.11        |
| 201067_at   | 10 | PSMC2  | BF215487  | 7q22.1-q22.3    |
| 201068_s_at | 15 | PSMC2  | NM_002803 | 7q22.1-q22.3    |
| 201267_s_at | 14 | PSMC3  | AL545523  | 11p12-p13       |
| 201699_at   | 15 | PSMC6  | NM_002806 | 14q22.1         |
| 201198_s_at | 15 | PSMD1  | AI860431  | 2q37.1          |
| 201199_s_at | 15 | PSMD1  | NM_002807 | 2q37.1          |
| 219485_s_at | 15 | PSMD10 | NM_002814 | Xq22.3          |
| 208776_at   | 11 | PSMD11 | BF432873  | 17q12           |
| 208777_s_at | 15 | PSMD11 | BF432873  | 17q12           |
| 202352_s_at | 15 | PSMD12 | AI446530  | 17q24.3         |
| 202353_s_at | 15 | PSMD12 | NM_002816 | 17q24.3         |
| 201232_s_at | 15 | PSMD13 | NM_002817 | 11p15.5         |
| 201233_at   | 15 | PSMD13 | NM_002817 | 11p15.5         |
| 212296_at   | 15 | PSMD14 | NM_005805 | 2q24.3          |
| 212509_s_at | 15 | PSMD14 | BF968134  | ---             |
| 200830_at   | 15 | PSMD2  | NM_002808 | 3q27.3          |
| 201388_at   | 15 | PSMD3  | NM_002809 | 17q21.2         |
| 200882_s_at | 15 | PSMD4  | NM_002810 | 1q21.3          |
| 210460_s_at | 15 | PSMD4  | AB033605  | 1q21.3          |
| 211609_x_at | 15 | PSMD4  | U51007    | ---             |
| 203447_at   | 15 | PSMD5  | AU157008  | 9q34.11         |
| 202753_at   | 15 | PSMD6  | NM_014814 | 3p21.1          |
| 201705_at   | 15 | PSMD7  | NM_002811 | 16q23-q24       |
| 200820_at   | 15 | PSMD8  | NM_002812 | 19q13.13        |
| 207805_s_at | 15 | PSMD9  | NM_002813 | 12q24.31-q24.32 |
| 200814_at   | 15 | PSME1  | NM_006263 | 14q11.2         |
| 201762_s_at | 15 | PSME2  | NM_002818 | 14q11.2         |
| 200987_x_at | 13 | PSME3  | AA758755  | 17q21           |
| 209852_x_at | 14 | PSME3  | BC001423  | 17q21           |
| 209853_s_at | 14 | PSME3  | BC001423  | 17q21           |
| 212219_at   | 14 | PSME4  | D38521    | 2p16.3          |
| 212222_at   | 15 | PSME4  | AU143855  | 2p16.3          |
| 201052_s_at | 15 | PSMF1  | BG029917  | 20p13           |
| 201053_s_at | 15 | PSMF1  | NM_006814 | 20p13           |
| 211961_s_at | 15 | PSN    | AK000826  | 3q21.3          |
| 218371_s_at | 15 | PSPC1  | AA969958  | 13q12.11        |
| 205048_s_at | 10 | PSPH   | NM_003832 | ---             |
| 205194_at   | 15 | PSPH   | NM_004577 | 7p15.2-p15.1    |
| 212722_s_at | 15 | PSR    | AK021780  | 17q25           |
| 212723_at   | 15 | PSR    | AK021780  | 17q25           |
| 216306_x_at | 15 | PTB-1  | X62006    | 19p13.3         |
| 202189_x_at | 15 | PTBP1  | NM_002819 | 19p13.3         |
| 211270_x_at | 15 | PTBP1  | BC002397  | 19p13.3         |
| 211271_x_at | 15 | PTBP1  | BC004383  | 19p13.3         |
| 212015_x_at | 15 | PTBP1  | BF690062  | 19p13.3         |
| 212016_s_at | 14 | PTBP1  | AA679988  | 19p13.3         |
| 218683_at   | 15 | PTBP2  | NM_021190 | 1p22.1-p21.3    |
| 214937_x_at | 15 | PTC4   | AI924817  | 8p22-p21.3      |
| 210266_s_at | 13 | PTC7   | AF220137  | 1p13.1          |

|             |    |          |           |                       |
|-------------|----|----------|-----------|-----------------------|
| 209815_at   | 14 | PTCH     | BG054916  | ---                   |
| 215492_x_at | 13 | PTCRA    | AL035587  | 6p21.3                |
| 219293_s_at | 15 | PTD004   | NM_013341 | 2q31.1                |
| 217780_at   | 15 | PTD008   | NM_016145 | 19p13.2               |
| 221599_at   | 15 | PTD015   | BC002752  | 11q13.4               |
| 221600_s_at | 15 | PTD015   | BC002752  | 11q13.4               |
| 215233_at   | 14 | PTDSR    | AA351360  | 17q25                 |
| 201433_s_at | 15 | PTDSS1   | NM_014754 | 8q22                  |
| 221005_s_at | 10 | PTDSS2   | NM_030783 | 11p15 /// 11p15       |
| 204054_at   | 14 | PTEN     | NM_000314 | 10q23.3               |
| 211711_s_at | 15 | PTEN     | BC005821  | 10q23.3 /// 10q23.3   |
| 218967_s_at | 14 | PTER     | BF112019  | 10p12                 |
| 211748_x_at | 15 | PTGDS    | BC005939  | 9q34.2-q34.3          |
| 212187_x_at | 15 | PTGDS    | NM_000954 | 9q34.2-q34.3          |
| 213933_at   | 15 | PTGER3   | AW242315  | ---                   |
| 204897_at   | 15 | PTGER4   | AA897516  | 5p13.1                |
| 218083_at   | 15 | PTGES2   | NM_025072 | 9q34.13               |
| 200627_at   | 15 | PTGES3   | BC003005  | 12q13.13              |
| 208131_s_at | 15 | PTGIS    | NM_000961 | 20q13.11-q13.13       |
| 205128_x_at | 14 | PTGS1    | NM_000962 | 9q32-q33.3            |
| 37547_at    | 15 | PTHB1    | U85995    | 7p14                  |
| 37549_g_at  | 15 | PTHB1    | U87408    | 7p14                  |
| 205911_at   | 12 | PTHR1    | NM_000316 | 3p22-p21.1            |
| 207821_s_at | 15 | PTK2     | NM_005607 | 8q24-qter             |
| 208820_at   | 15 | PTK2     | AL037339  | 8q24-qter             |
| 207011_s_at | 14 | PTK7     | NM_002821 | 6p21.1-p12.2          |
| 201745_at   | 15 | PTK9     | NM_002822 | 12q12 /// 12q12       |
| 214007_s_at | 14 | PTK9     | AW665024  | 12q12                 |
| 202009_at   | 15 | PTK9L    | NM_007284 | 3p21.1 /// 3p21.1     |
| 200772_x_at | 15 | PTMA     | NM_002823 | 2q35-q36              |
| 200773_x_at | 15 | PTMA     | NM_002823 | 2q35-q36              |
| 216384_x_at | 15 | PTMA     | AF257099  | ---                   |
| 216515_x_at | 15 | PTMA     | AL121585  | ---                   |
| 208549_x_at | 15 | PTMAP7   | NM_016171 | 2q35-q36 /// 2q35-q36 |
| 218045_x_at | 10 | PTMS     | M24398    | 12p13                 |
| 209465_x_at | 15 | PTN      | AL565812  | 7q33-q34              |
| 211737_x_at | 15 | PTN      | BC005916  | 7q33-q34 /// 7q33-q34 |
| 212032_s_at | 15 | PTOV1    | AL046054  | 19q13.33              |
| 200730_s_at | 15 | PTP4A1   | BF576710  | 6q12                  |
| 200731_s_at | 15 | PTP4A1   | AW165960  | 6q12                  |
| 200732_s_at | 14 | PTP4A1   | AL578310  | 6q12                  |
| 200733_s_at | 15 | PTP4A1   | BF576710  | 6q12                  |
| 208616_s_at | 15 | PTP4A2   | U48297    | 1p35                  |
| 206574_s_at | 15 | PTP4A3   | NM_007079 | 8q24.3                |
| 209695_at   | 15 | PTP4A3   | BC003105  | 8q24.3                |
| 40524_at    | 12 | PTPD1    | X79510    | 14q31.3               |
| 216988_s_at | 15 | ptp-IV1r | L48722    | ---                   |
| 219654_at   | 15 | PTPLA    | NM_014241 | 10p14-p13             |

|             |    |                 |           |                     |
|-------------|----|-----------------|-----------|---------------------|
| 212640_at   | 15 | PTPLB           | AV712602  | 3q21.1              |
| 202716_at   | 15 | PTPN1           | NM_002827 | 20q13.1-q13.2       |
| 209896_s_at | 15 | PTPN11          | AF119855  | 12q24               |
| 202006_at   | 15 | PTPN12          | NM_002835 | 7q11.23             |
| 204201_s_at | 13 | PTPN13          | NM_006264 | 4q21.3              |
| 205503_at   | 13 | PTPN14          | NM_005401 | 1q32.2              |
| 213521_at   | 13 | PTPN18          | AW575379  | 2q21.2              |
| 213136_at   | 15 | PTPN2           | AI828880  | 18p11.3-p11.2       |
| 213137_s_at | 12 | PTPN2           | AI828880  | 18p11.3-p11.2       |
| 206687_s_at | 14 | PTPN6           | NM_002831 | 12p13               |
| 202958_at   | 14 | PTPN9           | NM_002833 | 15q23               |
| 213795_s_at | 15 | PTPRA           | AL121905  | 20p13               |
| 205846_at   | 14 | PTPRB           | NM_002837 | 12q15-q21           |
| 213362_at   | 14 | PTPRD           | N73931    | 9p23-p24.3          |
| 214043_at   | 15 | PTPRD           | BF062299  | 9p23-p24.3          |
| 221840_at   | 14 | PTPRE           | AA775177  | 10q26               |
| 204944_at   | 15 | PTPRG           | NM_002841 | 3p21-p14            |
| 203038_at   | 15 | PTPRK           | NM_002844 | 6q22.2-23.1         |
| 203329_at   | 15 | PTPRM           | NM_002845 | 18p11.2             |
| 210675_s_at | 12 | PTPRQ           | U77917    | 12q15               |
| 204469_at   | 15 | PTPRZ1          | NM_002851 | 7q31.3              |
| 209694_at   | 15 | PTS             | M97655    | 11q22.3-q23.3       |
| 203554_x_at | 15 | PTTG1           | NM_004219 | 5q35.1              |
| 200677_at   | 15 | PTTG1IP         | NM_004339 | 21q22.3             |
| 218135_at   | 15 | PTX1            | NM_016570 | 12p11.23            |
| 206157_at   | 14 | PTX3            | NM_002852 | 3q25                |
| 201164_s_at | 15 | PUM1            | BG474429  | 1p35.2              |
| 201165_s_at | 15 | PUM1            | BE670915  | 1p35.2              |
| 201166_s_at | 15 | PUM1            | NM_014676 | 1p35.2              |
| 201493_s_at | 15 | PUM2            | BE778078  | 2p22-p21            |
| 216221_s_at | 15 | PUM2            | D87078    | 2p22-p21            |
| 206308_at   | 13 | PuMet; M.HsaIIP | AJ223333  | 10p15.1             |
| 204020_at   | 15 | PURA            | BF739943  | 5q31                |
| 208758_at   | 15 | PURH            | D89976    | 2q35                |
| 221277_s_at | 12 | PUS3            | NM_031307 | 11q24.2 /// 11q24.2 |
| 203149_at   | 14 | PVRL2           | NM_002856 | 19q13.2-q13.4       |
| 213325_at   | 14 | PVRL3           | AA129716  | 3q13                |
| 221974_at   | 15 | PWCR1           | AW770748  | ---                 |
| 201606_s_at | 15 | PWP1            | NM_007062 | 12q24.11            |
| 201608_s_at | 15 | PWP1            | NM_007062 | 12q24.11            |
| 219076_s_at | 15 | PXMP2           | NM_018663 | 12q24.33            |
| 210296_s_at | 15 | PXMP3           | BC005375  | 8q21.1              |
| 219428_s_at | 15 | PXMP4           | NM_007238 | 20q11.22            |
| 201087_at   | 15 | PXN             | NM_002859 | 12q24.31            |
| 202148_s_at | 14 | PYCR1           | NM_006907 | 17q25.3             |
| 201481_s_at | 15 | PYGB            | NM_002862 | 20p11.2-p11.1       |
| 202990_at   | 15 | PYGL            | NM_002863 | 14q21-q22           |
| 205577_at   | 12 | PYGM            | NM_005609 | 11q12-q13.2         |
| 217846_at   | 15 | QARS            | NM_005051 | 3p21.3-p21.1        |
| 209123_at   | 15 | QDPR            | BC000576  | 4p15.31             |

|             |    |           |           |                 |
|-------------|----|-----------|-----------|-----------------|
| 211874_s_at | 11 | MORF      | AF119230  | 10q22.2         |
| 212452_x_at | 15 | MORF      | AF113514  | 10q22.2         |
| 212262_at   | 15 | QKI       | AA149639  | 6q26-27         |
| 212263_at   | 15 | QKI       | AI114716  | 6q26-27         |
| 212265_at   | 15 | QKI       | AL031781  | 6q26-27         |
| 212636_at   | 15 | QKI       | AL031781  | 6q26-27         |
| 205174_s_at | 14 | QPCT      | NM_012413 | 2p22.3          |
| 204044_at   | 15 | QPRT      | NM_014298 | 16p12.1         |
| 209174_s_at | 15 | QRICH1    | BC000978  | 3p21.31         |
| 218949_s_at | 15 | QRSL1     | AL136679  | 6q21            |
| 201482_at   | 14 | QSCN6     | NM_002826 | 1q24            |
| 219178_at   | 12 | QTRTD1    | NM_024638 | 3q13.31         |
| 214543_x_at | 10 | QUAKING   | AF142421  | 6q26-27         |
| 202754_at   | 15 | R3HDM1    | NM_015361 | 2q21.3          |
| 200863_s_at | 15 | RAB11A    | AI215102  | 15q21.3-q22.31  |
| 200864_s_at | 15 | RAB11A    | NM_004663 | 15q21.3-q22.31  |
| 217793_at   | 15 | RAB11B    | NM_004218 | 19p13.3         |
| 219681_s_at | 12 | RAB11FIP1 | NM_025151 | 8p11.22         |
| 203883_s_at | 15 | RAB11FIP2 | BG249608  | 10q26.12        |
| 203884_s_at | 10 | RAB11FIP2 | NM_014904 | 10q26.12        |
| 203933_at   | 14 | RAB11FIP3 | NM_014700 | 16p13.3         |
| 202252_at   | 15 | RAB13     | NM_002870 | 1q21.2          |
| 200927_s_at | 15 | RAB14     | AA919115  | 9q32-q34.11     |
| 221810_at   | 10 | RAB15     | AA631242  | ---             |
| 59697_at    | 15 | RAB15     | AA582932  | ---             |
| 207791_s_at | 15 | RAB1A     | NM_004161 | 2p14            |
| 208724_s_at | 15 | RAB1A     | BC000905  | 2p14            |
| 212677_s_at | 15 | RAB1A     | BG530481  | 2p14            |
| 213440_at   | 15 | RAB1A     | AL530264  | 2p14            |
| 220964_s_at | 13 | RAB1B     | NM_030981 | 11q12 /// 11q12 |
| 208730_x_at | 15 | RAB2      | AA535244  | 8q12.1          |
| 208731_at   | 15 | RAB2      | AU158062  | 8q12.1          |
| 208732_at   | 15 | RAB2      | AU158062  | 8q12.1          |
| 208733_at   | 13 | RAB2      | AW301641  | 8q12.1          |
| 208734_x_at | 15 | RAB2      | M28213    | 8q12.1          |
| 221960_s_at | 10 | RAB2      | AI189609  | 8q12.1          |
| 219622_at   | 15 | RAB20     | NM_017817 | 13q34           |
| 203885_at   | 15 | RAB21     | NM_014999 | 12q15           |
| 213405_at   | 14 | RAB22A    | N95443    | 20q13.32        |
| 218360_at   | 15 | RAB22A    | NM_020673 | 20q13.32        |
| 217762_s_at | 15 | Rab22B    | AF183421  | 18p11.3         |
| 217763_s_at | 15 | Rab22B    | AF183421  | 18p11.3         |
| 217764_s_at | 15 | Rab22B    | AF183421  | 18p11.3         |
| 209514_s_at | 15 | RAB27A    | BE502030  | 15q15-q21.1     |
| 222294_s_at | 13 | RAB27A    | AW971415  | 15q15-q21.1     |
| 207495_at   | 10 | RAB28     | NM_004249 | 4p16.1          |
| 209110_s_at | 15 | RAB2L     | AL050259  | 6p21.3          |
| 204214_s_at | 11 | RAB32     | NM_006834 | 6q24.2          |
| 206039_at   | 11 | RAB33A    | NM_004794 | Xq26.1          |
| 221014_s_at | 14 | RAB33B    | NM_031296 | 4q28 /// 4q28   |

|             |    |                |           |              |
|-------------|----|----------------|-----------|--------------|
| 221819_at   | 15 | RAB35          | BF791960  | 12q24.31     |
| 213530_at   | 15 | RAB3GAP        | AI040009  | 2q21.3       |
| 213531_s_at | 15 | RAB3GAP        | AI040009  | 2q21.3       |
| 202372_at   | 15 | RAB3-GAP150    | BF240652  | 1q42.11      |
| 204547_at   | 15 | RAB40B         | NM_006822 | 17q25.3      |
| 203581_at   | 15 | RAB4A          | BC002438  | 1q42-q43     |
| 203582_s_at | 15 | RAB4A          | NM_004578 | 1q42-q43     |
| 206113_s_at | 15 | RAB5A          | NM_004162 | 3p24-p22     |
| 209089_at   | 15 | RAB5A          | BC001267  | 3p24-p22     |
| 201276_at   | 15 | RAB5B          | AF267863  | 12q13        |
| 201140_s_at | 15 | RAB5C          | AF141304  | 17q21.2      |
| 201156_s_at | 11 | RAB5C          | AF141304  | 17q21.2      |
| 214552_s_at | 13 | RAB5EP; RABPT5 | AF098638  | 17p13.3      |
| 201047_x_at | 15 | RAB6A          | BC003617  | 11q13.3      |
| 221792_at   | 14 | RAB6B          | AW118072  | ---          |
| 210406_s_at | 15 | RAB6C          | AL136727  | 2q31         |
| 212561_at   | 15 | RAB6IP1        | AA349595  | 11p15.3      |
| 211960_s_at | 15 | RAB7           | BG261416  | 3q21.3       |
| 218699_at   | 15 | RAB7L1         | NM_003929 | 1q32         |
| 218700_s_at | 14 | RAB7L1         | NM_003929 | 1q32         |
| 208819_at   | 15 | RAB8A          | BC002977  | 19p13.1      |
| 221808_at   | 15 | RAB9A          | NM_004251 | Xp22.2       |
| 203136_at   | 15 | RABAC1         | NM_006423 | 19q13.31     |
| 74694_s_at  | 14 | RABEP2         | AA907940  | 16p12.1      |
| 77508_r_at  | 14 | RABEP2         | AW001436  | 16p12.1      |
| 203150_at   | 15 | RABEPK         | NM_005833 | 9q34.11      |
| 204028_s_at | 15 | RABGAP1        | NM_012197 | 9q34.11      |
| 213313_at   | 15 | RABGAP1        | AI922519  | 9q34.11      |
| 203020_at   | 15 | RABGAP1L       | NM_014857 | 1q24         |
| 213982_s_at | 15 | RABGAP1L       | BG107203  | 1q24         |
| 218310_at   | 15 | RABGEF1        | NM_014504 | 7q11.21      |
| 203573_s_at | 15 | RABGGTA        | NM_004581 | 14q11.2      |
| 213704_at   | 15 | RABGGTB        | AA129753  | 1p31         |
| 220500_s_at | 14 | RABL2A         | NM_007082 | 2q13         |
| 219151_s_at | 15 | RABL2B         | NM_007081 | 22q13.33     |
| 205037_at   | 15 | RABL4          | NM_006860 | 22q13.1      |
| 208640_at   | 15 | RAC1           | BG292367  | 7p22         |
| 208641_s_at | 15 | RAC1           | BC004247  | 7p22         |
| 213603_s_at | 15 | RAC2           | BE138888  | 22q13.1      |
| 209426_s_at | 10 | RACE           | AF047020  | 5p13.2-q11.1 |
| 222077_s_at | 15 | RACGAP1        | AU153848  | 12q13.12     |
| 204460_s_at | 15 | RAD1           | NM_002853 | 5p13.2       |
| 204461_x_at | 15 | RAD1           | NM_002853 | 5p13.2       |
| 207405_s_at | 15 | RAD17          | NM_002873 | 5q13         |
| 210826_x_at | 14 | RAD17          | AF098533  | 5q13         |
| 211228_s_at | 15 | RAD17          | AF085736  | 5q13         |
| 200607_s_at | 15 | RAD21          | BG289967  | 8q24         |
| 200608_s_at | 15 | RAD21          | NM_006265 | 8q24         |
| 201039_s_at | 15 | RAD23A         | NM_005053 | 19p13.2      |
| 201046_s_at | 15 | RAD23A         | NM_005053 | 19p13.2      |



|             |    |             |           |                 |
|-------------|----|-------------|-----------|-----------------|
| 201222_s_at | 15 | RAD23B      | AL527365  | 9q31.2          |
| 201223_s_at | 15 | RAD23B      | NM_002874 | 9q31.2          |
| 208393_s_at | 12 | RAD50       | NM_005732 | 5q31            |
| 204146_at   | 14 | RAD51AP1    | BE966146  | 12p13.2-p13.1   |
| 206066_s_at | 14 | RAD51C      | NM_002876 | 17q22-q23       |
| 209849_s_at | 15 | RAD51C      | AF029669  | 17q22-q23       |
| 37793_r_at  | 13 | RAD51D      | AF034956  | 17q11           |
| 211994_at   | 15 | RAD52       | AI742553  | 12p13.3         |
| 208860_s_at | 14 | RAD54L      | U09820    | Xq13.1-q21.1    |
| 204828_at   | 14 | RAD9A       | NM_004584 | 11q13.1-q13.2   |
| 201558_at   | 15 | RAE1        | NM_003610 | 20q13.31        |
| 211318_s_at | 15 | RAE1        | U85943    | ---             |
| 201244_s_at | 15 | RAF1        | NM_002880 | 3p25            |
| 212646_at   | 15 | RAFTLIN     | D42043    | 3p25.1          |
| 219125_s_at | 12 | RAG1AP1     | NM_018845 | 1q22            |
| 205130_at   | 15 | RAGE        | NM_014226 | 14q32           |
| 202052_s_at | 15 | RAI14       | NM_015577 | 5p13.3-p13.2    |
| 218337_at   | 12 | RAI16       | NM_022749 | 8p21.3          |
| 212124_at   | 15 | RAI17       | AF070622  | 10q23.1         |
| 219440_at   | 12 | RAI2        | NM_021785 | Xp22            |
| 209833_at   | 15 | RAIDD       | U79115    | 12q21.33-q23.1  |
| 214435_x_at | 15 | RALA        | NM_005402 | 7p15-p13        |
| 202100_at   | 15 | RALB        | BG169673  | 2cen-q13        |
| 202101_s_at | 11 | RALB        | NM_002881 | 2cen-q13        |
| 202844_s_at | 13 | RALBP1      | NM_006788 | 18p11.3         |
| 202845_s_at | 15 | RALBP1      | NM_006788 | 18p11.3         |
| 207016_s_at | 15 | RALDH2      | AB015228  | 15q21.2         |
| 209050_s_at | 15 | RALGDS      | AI421559  | 9q34.3          |
| 210552_s_at | 11 | RALGEF2     | AF221098  | 9q34.13         |
| 204199_at   | 15 | RALGPS1     | NM_014636 | 9q34.13         |
| 201271_s_at | 15 | RALY        | NM_016732 | 20q11.21-q11.23 |
| 218585_s_at | 15 | RAMP; L2DTL | AK001261  | ---             |
| 204916_at   | 15 | RAMP1       | NM_005855 | 2q36-q37.1      |
| 205779_at   | 15 | RAMP2       | NM_005854 | 17q12-q21.1     |
| 205326_at   | 14 | RAMP3       | NM_005856 | 7p13-p12        |
| 200749_at   | 15 | RAN         | BF112006  | 6p21            |
| 202483_s_at | 15 | RANBP1      | NM_002882 | 22q11.21        |
| 53987_at    | 15 | RANBP10     | AL041852  | 16q22.1         |
| 201711_x_at | 15 | RANBP2      | AI681120  | 2q12.3          |
| 201712_s_at | 15 | RANBP2      | NM_006267 | 2q12.3          |
| 212842_x_at | 15 | RANBP2L1    | AL043571  | 2q13            |
| 202640_s_at | 13 | RANBP3      | NM_003624 | 19p13.3         |
| 211953_s_at | 15 | RANBP5      | BC000947  | 13q32.2         |
| 211954_s_at | 15 | RANBP5      | BC000947  | 13q32.2         |
| 211955_at   | 15 | RANBP5      | NM_002271 | 13q32.2         |
| 213019_at   | 15 | RANBP6      | AI123233  | 9p24.1          |
| 202583_s_at | 15 | RANBP9      | NM_005493 | 6p23            |
| 213838_at   | 15 | RANBP9      | AA191426  | 6p23            |
| 202582_s_at | 15 | RANBPM      | AF306510  | 6p23            |
| 218526_s_at | 15 | RANGNRF     | NM_014185 | 17p13           |

|             |    |          |           |                   |
|-------------|----|----------|-----------|-------------------|
| 209284_s_at | 14 | RAP140   | AI922509  | 3p21.31           |
| 209285_s_at | 15 | RAP140   | N38985    | 3p21.31           |
| 202362_at   | 15 | RAP1A    | NM_002884 | 1p13.3            |
| 200833_s_at | 15 | RAP1B    | NM_015646 | 12q14             |
| 213280_at   | 11 | RAP1GA3  | AK000478  | 17p13.3           |
| 209444_at   | 15 | RAP1GDS1 | BC001851  | 4q23-q25          |
| 221830_at   | 15 | RAP2A    | AI302106  | 13q34             |
| 213923_at   | 15 | RAP2B    | AW005535  | 3q25.2            |
| 218668_s_at | 13 | RAP2C    | NM_021183 | Xq25              |
| 218669_at   | 15 | RAP2C    | NM_021183 | Xq25              |
| 220746_s_at | 15 | RAP80    | NM_016290 | 5q35.3            |
| 203096_s_at | 15 | RAPGEF2  | BF439282  | 4q32.1            |
| 203097_s_at | 15 | RAPGEF2  | NM_014247 | 4q32.1            |
| 205651_x_at | 13 | RAPGEF4  | NM_007023 | 2q31-q32          |
| 204680_s_at | 12 | RAPGEF5  | AI263837  | 7p15.3            |
| 204681_s_at | 15 | RAPGEF5  | NM_012294 | 7p15.3            |
| 203749_s_at | 15 | RARA     | AI806984  | 17q21             |
| 205080_at   | 15 | RARB     | NM_000965 | 3p24              |
| 209496_at   | 10 | RARRES2  | BC000069  | 7q36.1            |
| 204070_at   | 13 | RARRES3  | NM_004585 | 11q23             |
| 201330_at   | 14 | RARS     | NM_002887 | 5q35.1 /// 5q35.1 |
| 202677_at   | 15 | RASA1    | NM_002890 | 5q13.3            |
| 212706_at   | 14 | RASA4    | AI738591  | 7q11.22           |
| 205590_at   | 10 | RASGRP1  | NM_005739 | 15q15             |
| 214369_s_at | 15 | RASGRP2  | AI688812  | 11q13             |
| 205801_s_at | 15 | RASGRP3  | NM_015376 | 2p25.1-p24.1      |
| 220027_s_at | 15 | RASIP1   | NM_017805 | 19q13.33          |
| 219142_at   | 14 | RASL11B  | NM_023940 | 4q12              |
| 219167_at   | 15 | RASL12   | NM_016563 | 15q11.2-q22.33    |
| 204346_s_at | 15 | RASSF1   | NM_007182 | 3p21.3            |
| 203185_at   | 15 | RASSF2   | NM_014737 | 20pter-p12.1      |
| 49306_at    | 14 | RASSF4   | AI890191  | 10q11.21          |
| 209139_s_at | 15 | RAX      | AF083033  | 2q31.3            |
| 203132_at   | 15 | RB1      | NM_000321 | 13q14.2           |
| 202033_s_at | 15 | RB1CC1   | BG402105  | 8p22-q21.13       |
| 202034_x_at | 15 | RB1CC1   | NM_014781 | 8p22-q21.13       |
| 211950_at   | 15 | RBAF600  | AB007931  | 1p36.13           |
| 219214_s_at | 10 | RBAK     | NM_021163 | 7p22.2            |
| 211202_s_at | 15 | RBBP2H1  | AF087481  | 1q32.1            |
| 210371_s_at | 15 | RBBP4    | BC003092  | 1p34.3            |
| 217301_x_at | 15 | RBBP4    | X71810    | 1p34.3            |
| 205178_s_at | 15 | RBBP6    | NM_006910 | 16p12.2           |
| 201092_at   | 15 | RBBP7    | NM_002893 | Xp22.22           |
| 203344_s_at | 15 | RBBP8    | NM_002894 | 18q11.2           |
| 57540_at    | 13 | RBKS     | AI823980  | 2p23.3            |
| 212332_at   | 10 | RBL2     | BF110947  | 16q12.2           |
| 208984_x_at | 15 | RBM10    | BC004181  | Xp11.23           |
| 215089_s_at | 15 | RBM10    | AW409974  | Xp11.23           |
| 217221_x_at | 13 | RBM10    | AL137421  | Xp11.23           |
| 212168_at   | 15 | RBM12    | AL514547  | 20q11.23          |

|             |    |           |           |               |
|-------------|----|-----------|-----------|---------------|
| 211686_s_at | 15 | RBM13     | AF251062  | 8p12 /// 8p12 |
| 219286_s_at | 15 | RBM15     | NM_022768 | 1p13          |
| 202689_at   | 10 | RBM15B    | NM_013286 | 3p21.31       |
| 203250_at   | 15 | RBM16     | NM_014892 | 6q25.1-q25.3  |
| 218134_s_at | 15 | RBM22     | NM_018047 | 5q33.1        |
| 219816_s_at | 15 | RBM23     | NM_018107 | 14q11.2       |
| 212027_at   | 14 | RBM25     | AI925305  | 14q24.3       |
| 212030_at   | 15 | RBM25     | BG251218  | 14q24.3       |
| 212031_at   | 15 | RBM25     | AV757384  | 14q24.3       |
| 212033_at   | 15 | RBM25     | BF055107  | 14q24.3       |
| 218593_at   | 15 | RBM28     | NM_018077 | 7q32.2        |
| 208319_s_at | 15 | RBM3      | NM_006743 | Xp11.2        |
| 209497_s_at | 15 | RBM30     | BC003503  | 11q13         |
| 200997_at   | 15 | RBM4      | NM_002896 | 11q13         |
| 201967_at   | 15 | RBM6      | NM_005777 | 3p21.3        |
| 218379_at   | 15 | RBM7      | NM_016090 | 11q23.1-q23.2 |
| 214113_s_at | 15 | RBM8A     | AI738479  | 1q12          |
| 212104_s_at | 15 | RBM9      | N95026    | 22q13.1       |
| 216215_s_at | 15 | RBM9      | AL049748  | 22q13.1       |
| 203748_x_at | 15 | RBMS1     | NM_016839 | 2q24.3        |
| 207266_x_at | 15 | RBMS1     | NM_016837 | 2q24.3        |
| 215127_s_at | 15 | RBMS1     | AL517946  | 2q24.3        |
| 206767_at   | 13 | RBMS3     | NM_014483 | 3p24-p23      |
| 213762_x_at | 15 | RBMX      | AI452524  | Xq26          |
| 204098_at   | 15 | RBMX2     | NM_016024 | Xq26.1        |
| 203423_at   | 15 | RBP1      | NM_002899 | 3q23          |
| 2028_s_at   | 14 | RBP3      | M96577    | 20q11.2       |
| 207836_s_at | 15 | RBPMS     | NM_006867 | 8p12-p11      |
| 209487_at   | 15 | RBP-MS    | D84109    | 8p12-p11      |
| 209488_s_at | 15 | RBP-MS    | D84109    | 8p12-p11      |
| 207785_s_at | 15 | RBPSUH    | NM_015874 | 4p15.2        |
| 211974_x_at | 15 | RBPSUH    | AL513759  | 4p15.2        |
| 218117_at   | 15 | RBX1      | NM_014248 | 22q13.2       |
| 210751_s_at | 15 | RC; SMP30 | D31815    | Xp11.3        |
| 212820_at   | 15 | RC3       | AB020663  | 15q15.3       |
| 203941_at   | 15 | RC74      | NM_018250 | 8p21.1        |
| 218352_at   | 15 | RCBTB1    | NM_018191 | 13q14         |
| 204759_at   | 15 | RCBTB2    | NM_001268 | 13q14.3       |
| 206499_s_at | 15 | RCC1      | NM_001269 | 1p36.1        |
| 202496_at   | 11 | RCD-8     | NM_014329 | 16q22.1       |
| 212749_s_at | 15 | RCHY1     | AI096477  | 4q21.21       |
| 214281_s_at | 15 | RCHY1     | AA524525  | 4q21.21       |
| 39817_s_at  | 15 | Rcl       | AF040105  | 6p21.1        |
| 201063_at   | 15 | RCN1      | NM_002901 | 11p13         |
| 201485_s_at | 15 | RCN2      | BC004892  | 15q23         |
| 201486_at   | 15 | RCN2      | NM_002902 | 15q23         |
| 212612_at   | 15 | RCOR      | D31888    | 14q32.33      |
| 218344_s_at | 15 | RCOR3     | AI807073  | 1q32.3        |
| 203898_at   | 12 | RCP9      | AU154853  | 7q11.21       |
| 203899_s_at | 15 | RCP9      | NM_014478 | 7q11.21       |

|             |    |                  |           |                       |
|-------------|----|------------------|-----------|-----------------------|
| 209219_at   | 15 | RD               | L03411    | 6p21.3                |
| 216220_s_at | 10 | RDC7             | X68485    | 1q32.1                |
| 217042_at   | 15 | RDH11            | AL096716  | 14q24.1               |
| 209605_at   | 14 | RDS; MGC19578    | D87292    | 22q13.1               |
| 212167_s_at | 15 | RDT              | AK021419  | 22q11.23              |
| 204969_s_at | 12 | RDX              | NM_002906 | 11q23                 |
| 212397_at   | 15 | RDX              | AL137751  | 11q23                 |
| 212398_at   | 15 | RDX              | AI057093  | 11q23                 |
| 210216_x_at | 15 | REC1             | AF084513  | 5p13.2                |
| 221531_at   | 15 | REC14            | AF309553  | 15q24.1               |
| 221532_s_at | 15 | REC14            | AF309553  | 15q24.1               |
| 209571_at   | 14 | recepin          | U03644    | 2q31.1                |
| 205407_at   | 14 | RECK             | NM_021111 | 9p13-p12              |
| 205091_x_at | 15 | RECQL            | NM_002907 | 12p12                 |
| 210568_s_at | 13 | RECQL            | BC001052  | 12p12                 |
| 212917_x_at | 15 | RECQL            | AI814728  | 12p12                 |
| 213878_at   | 15 | RECQL            | AI685944  | 12p12                 |
| 201783_s_at | 15 | RELA             | NM_021975 | 11q13                 |
| 205923_at   | 14 | RELN             | NM_005045 | 7q22                  |
| 211168_s_at | 11 | RENT1            | D86988    | 19p13.2-p13.11        |
| 219041_s_at | 15 | REPIN1           | NM_014374 | 7q36.1                |
| 202296_s_at | 15 | RER1             | NM_007033 | 1pter-q24             |
| 202297_s_at | 15 | RER1             | AF157324  | 1pter-q24             |
| 200940_s_at | 15 | RERE             | AI920976  | 1p36.1-p36.2          |
| 212920_at   | 14 | REST             | AV682285  | ---                   |
| 210788_s_at | 15 | retDSR4; retSDR4 | AF126782  | 14q23.1               |
| 218124_at   | 15 | RetSat           | NM_017750 | 2p11.2                |
| 218428_s_at | 15 | REV1L            | NM_016316 | 2q11.1-q11.2          |
| 208070_s_at | 15 | REV3L            | NM_002912 | 6q21                  |
| 218194_at   | 15 | REXO2            | NM_015523 | 11q23.1-q23.2         |
| 208021_s_at | 14 | RFC1             | NM_002913 | 4p14-p13 /// 4p14-p13 |
| 209084_s_at | 15 | RFC1             | BE504689  | 4p14-p13              |
| 209085_x_at | 13 | RFC1             | L14922    | 4p14-p13              |
| 204127_at   | 15 | RFC3             | BC000149  | 13q12.3-q13           |
| 204023_at   | 15 | RFC4             | NM_002916 | 3q27                  |
| 203209_at   | 15 | RFC5             | BC001866  | 12q24.2-q24.3         |
| 203224_at   | 15 | RFK              | BF340123  | 9q21.31               |
| 203225_s_at | 15 | RFK              | NM_018339 | 9q21.31               |
| 212968_at   | 15 | RFNG             | BF940276  | 17q25                 |
| 212116_at   | 15 | RFP              | AL523814  | 6p22                  |
| 212118_at   | 15 | RFP              | AL523814  | 6p22                  |
| 203659_s_at | 15 | RFP2             | NM_005798 | 13q14                 |
| 207936_x_at | 14 | RFPL3            | NM_006604 | 22q12.3               |
| 202963_at   | 14 | RFX5             | AW027312  | 1q21                  |
| 202758_s_at | 14 | RFXANK           | NM_003721 | 19p12                 |
| 218723_s_at | 15 | RGC32            | NM_014059 | 13q13.3               |
| 209568_s_at | 15 | RGL              | AF186779  | 1q25.2                |
| 210676_x_at | 15 | RGP5             | U64675    | 2q13                  |
| 204316_at   | 10 | RGS10            | W19676    | 10q25                 |

|             |    |         |           |                   |
|-------------|----|---------|-----------|-------------------|
| 204319_s_at | 15 | RGS10   | NM_002925 | 10q25             |
| 205823_at   | 14 | RGS12   | AI824113  | 4p16.3            |
| 204336_s_at | 12 | RGS19   | NM_005873 | 20q13.3           |
| 202388_at   | 15 | RGS2    | NM_002923 | 1q31              |
| 203823_at   | 15 | RGS3    | NM_021106 | 9q32              |
| 204337_at   | 13 | RGS4    | AL514445  | 1q23.2            |
| 209070_s_at | 15 | RGS5    | AI183997  | 1q23.1            |
| 209071_s_at | 15 | RGS5    | AF159570  | 1q23.1            |
| 218353_at   | 15 | RGS5    | NM_025226 | 1q23.1 /// 1q23.1 |
| 206145_at   | 12 | RH2     | AF178841  | 6p21.1-p11        |
| 209709_s_at | 15 | RHAMM   | U29343    | 5q33.2-qter       |
| 218686_s_at | 15 | RHBDF1  | NM_022450 | 16p13.3           |
| 219489_s_at | 15 | RHBDL2  | NM_017821 | 1p34.2            |
| 201453_x_at | 15 | RHEB    | NM_005614 | 7q36              |
| 213404_s_at | 15 | RHEB    | BF033683  | ---               |
| 213409_s_at | 11 | RHEB    | BF593727  | 7q36              |
| 221780_s_at | 13 | RHLP    | AF336851  | 20q13.13          |
| 215693_x_at | 15 | RHLP    | AL512707  | 20q13.13          |
| 200059_s_at | 15 | RHOA    | BC001360  | 3p21.3            |
| 212099_at   | 15 | RHOB    | AI263909  | 2pter-p12         |
| 212651_at   | 15 | RHOBTB1 | AB018283  | 10q21.3           |
| 202975_s_at | 15 | RHOBTB3 | N21138    | 5q15              |
| 202976_s_at | 15 | RHOBTB3 | NM_014899 | 5q15              |
| 216048_s_at | 14 | RHOBTB3 | AK023621  | 5q15              |
| 216049_at   | 12 | RHOBTB3 | AK023621  | 5q15              |
| 209885_at   | 10 | RHOD    | BC001338  | 11q14.3           |
| 219045_at   | 15 | RHOF    | NM_019034 | 12q24.31          |
| 203175_at   | 15 | RHOG    | NM_001665 | 11p15.5-p15.4     |
| 212119_at   | 15 | RHOQ    | BF670447  | 2p21              |
| 214449_s_at | 15 | RHOQ    | NM_012249 | 2p21              |
| 218323_at   | 15 | RHOT1   | NM_018307 | 17q12             |
| 222148_s_at | 15 | RHOT1   | BF688108  | 17q12             |
| 65770_at    | 14 | RHOT2   | AI186666  | 16p13.3           |
| 49327_at    | 15 | RIC8    | AI492888  | 11p15.5           |
| 221647_s_at | 15 | RIC-8   | AL136935  | 11p15.5           |
| 219446_at   | 15 | RIC8B   | NM_018157 | 12q24.11          |
| 208632_at   | 15 | RIE2    | AL578551  | 12q24.31          |
| 221127_s_at | 14 | RIG     | NM_006394 | 11p15.1           |
| 36829_at    | 15 | RIGUI   | AF022991  | 17p13.1-17p12     |
| 205211_s_at | 12 | RIN1    | NM_004292 | 11q13.1           |
| 209684_at   | 15 | RIN2    | AL136924  | ---               |
| 60471_at    | 12 | RIN3    | AA625133  | 14q32.13          |
| 208371_s_at | 12 | RING1   | NM_002931 | 6p21.3            |
| 35685_at    | 15 | RING1   | AL031228  | 6p21.3            |
| 218598_at   | 14 | RINT-1  | NM_021930 | 7q22.2            |
| 218535_s_at | 14 | RIOK2   | NM_018343 | 5q15              |
| 202129_s_at | 12 | RIOK3   | AW006290  | 18q11.2           |
| 202130_at   | 15 | RIOK3   | NM_003831 | 18q11.2           |
| 202131_s_at | 15 | RIOK3   | NM_003831 | 18q11.2           |
| 213939_s_at | 15 | RIPX    | AI871641  | 4q21.1            |

|             |    |                 |           |                     |
|-------------|----|-----------------|-----------|---------------------|
| 210251_s_at | 13 | RIPX; KIAA0871  | AF112221  | 4q21.1              |
| 91816_f_at  | 15 | RKHD1           | C18318    | ---                 |
| 218247_s_at | 15 | RKHD2           | NM_016626 | 18q21.1             |
| 204243_at   | 15 | RLF             | NM_012421 | 1p32                |
| 212467_at   | 15 | RME8            | AB014578  | 3q22.1              |
| 201785_at   | 15 | RNASE1          | NM_002933 | 14q11.2             |
| 206111_at   | 11 | RNASE2          | NM_002934 | 14q24-q31           |
| 205158_at   | 15 | RNASE4          | NM_002937 | 14q11.1             |
| 213397_x_at | 14 | RNASE4          | AI761728  | 14q11.1             |
| 218497_s_at | 15 | RNASEH1         | BG534527  | 2p25                |
| 203022_at   | 15 | RNASEH2A        | NM_006397 | 19p13.2             |
| 218269_at   | 15 | RNASEN          | NM_013235 | 5p13.3              |
| 217983_s_at | 15 | RNASET2         | NM_003730 | 6q27                |
| 217984_at   | 15 | RNASET2         | NM_003730 | 6q27                |
| 207801_s_at | 15 | RNF10           | NM_014868 | 12q24.31            |
| 202636_at   | 15 | RNF103          | NM_005667 | 2p11.2              |
| 218761_at   | 15 | RNF111          | NM_017610 | 15q21               |
| 209565_at   | 15 | RNF113A         | BC000832  | Xq25-q26            |
| 219021_at   | 14 | RNF121          | NM_018320 | 11q13.3             |
| 215031_x_at | 12 | RNF126          | BG420893  | 19p13.3             |
| 201779_s_at | 15 | RNF13           | NM_007282 | 3q25.1              |
| 201780_s_at | 15 | RNF13           | NM_007282 | 3q25.1              |
| 217865_at   | 15 | RNF130          | NM_018434 | 5q35.3              |
| 218738_s_at | 15 | RNF138          | NM_016271 | 18q12.1             |
| 201823_s_at | 15 | RNF14           | NM_004290 | 5q23.3-q31.1        |
| 204040_at   | 15 | RNF144          | NM_014746 | 2p25.2              |
| 221430_s_at | 14 | RNF146          | NM_030963 | 6q22.1-q22.33       |
| 220985_s_at | 10 | RNF170          | NM_030954 | 8p11.21 /// 8p11.21 |
| 210075_at   | 11 | RNF172          | AF151074  | 19p13.3             |
| 219035_s_at | 15 | RNF34           | NM_025126 | 12q24.31            |
| 218528_s_at | 15 | RNF38           | NM_022781 | ---                 |
| 212696_s_at | 15 | RNF4            | BF968633  | 4p16.3              |
| 201962_s_at | 13 | RNF41           | NM_005785 | 12q13.13            |
| 203286_at   | 15 | RNF44           | NM_014901 | 5q35.3              |
| 209111_at   | 15 | RNF5            | BC004155  | 6p21.3              |
| 209682_at   | 15 | RNF56           | U26710    | 3q13.11-q13.12      |
| 203403_s_at | 15 | RNF6            | NM_005977 | 13q12.2             |
| 209845_at   | 15 | RNF61           | AF117233  | 7q34                |
| 218286_s_at | 15 | RNF7            | NM_014245 | 3q22-q24            |
| 210541_s_at | 13 | RNF76; TRIM27   | AF230394  | 6p22                |
| 203160_s_at | 15 | RNF8            | NM_003958 | 6p21.3              |
| 215945_s_at | 13 | RNF86; KIAA0517 | BC005016  | 4q31.3              |
| 204208_at   | 13 | RNGTT           | NM_003800 | 6q16                |
| 206050_s_at | 15 | RNH1            | NM_002939 | 11p15.5             |
| 202683_s_at | 15 | RNMT            | NM_003799 | 18p11.22-p11.23     |
| 202684_s_at | 10 | RNMT            | AB020966  | 18p11.22-p11.23     |
| 218993_at   | 13 | RNMTL1          | NM_018146 | 17p13.3             |
| 200087_s_at | 15 | RNP24           | AK024976  | 12q24.31            |
| 212430_at   | 15 | RNPC1           | AL109955  | 20q13.31            |
| 207941_s_at | 15 | RNPC2           | NM_004902 | 20q11.23            |

|             |    |                |           |               |
|-------------|----|----------------|-----------|---------------|
| 208270_s_at | 15 | RNPEP          | NM_020216 | 1q32          |
| 218301_at   | 14 | RNPEPL1        | NM_018226 | 2q37.3        |
| 200060_s_at | 15 | RNPS1          | BC001659  | 16p13.3       |
| 215011_at   | 13 | RNU17D         | AJ006835  | 1p36.1        |
| 207438_s_at | 15 | RNUT1          | NM_005701 | 15q23         |
| 213194_at   | 15 | ROBO1          | BF059159  | 3p14.2        |
| 220758_s_at | 14 | ROBO4          | NM_019055 | 11q24.2       |
| 209882_at   | 15 | ROC1           | AF084462  | 1q22          |
| 213044_at   | 15 | ROCK1          | N22548    | 18q11.2       |
| 214578_s_at | 14 | ROCK1          | AV683882  | 18q11.2       |
| 202762_at   | 15 | ROCK2          | AL049383  | 2p24          |
| 211504_x_at | 14 | ROCK2          | D87931    | 2p24          |
| 214697_s_at | 12 | ROD1           | AW190873  | 9q33.1        |
| 210320_s_at | 13 | ROK1           | AF077033  | 17q21.1       |
| 220425_x_at | 10 | ROPN1          | NM_017578 | 3q21.2        |
| 205805_s_at | 14 | ROR1           | NM_005012 | 1p32-p31      |
| 210479_s_at | 15 | ROR1           | L14611    | 15q21-q22     |
| 36019_at    | 15 | RP             | L26260    | 6p21.3        |
| 214357_at   | 12 | RP1-106H8.1    | AL035295  | 1q24.1        |
| 214755_at   | 13 | RP11-229P13.18 | AK022632  | 9q34.3        |
| 205191_at   | 12 | RP2            | NM_006915 | Xp11.4-p11.21 |
| 213058_at   | 15 | RP3-477H23.1   | AL033538  | ---           |
| 212774_at   | 15 | RP58           | AJ223321  | 1q44-qter     |
| 201528_at   | 15 | RPA1           | NM_002945 | 17p13.3       |
| 201529_s_at | 15 | RPA1           | NM_002945 | 17p13.3       |
| 215088_s_at | 15 | RPA1           | BG110532  | ---           |
| 201756_at   | 15 | RPA2           | NM_002946 | 1p35          |
| 209507_at   | 15 | RPA3           | BC005264  | 7p22          |
| 209317_at   | 15 | RPA5           | AF008442  | 6p21.1        |
| 218441_s_at | 14 | RPAP1          | NM_015540 | 15q14         |
| 216282_x_at | 14 | RPB3           | AJ224143  | 16q13-q21     |
| 209382_at   | 15 | RPC62          | U93867    | 1q21.2        |
| 221614_s_at | 14 | RPH3AL         | BC005153  | 17p13.3       |
| 212973_at   | 15 | RPIA           | AI692341  | 2p11.2        |
| 200725_x_at | 15 | RPL10          | NM_006013 | Xq28          |
| 217379_at   | 15 | RPL10          | AL121934  | ---           |
| 221989_at   | 15 | RPL10          | AW057781  | Xq28          |
| 200036_s_at | 15 | RPL10A         | NM_007104 | 6p21.3-p21.2  |
| 217559_at   | 15 | RPL10L         | AI001784  | 14q13-q21     |
| 200010_at   | 15 | RPL11          | NM_000975 | 1p36.1-p35    |
| 200088_x_at | 15 | RPL12          | AK026491  | ---           |
| 200809_x_at | 15 | RPL12          | NM_000976 | 9q34          |
| 214271_x_at | 15 | RPL12          | AA281332  | 9q34          |
| 208929_x_at | 15 | RPL13          | BC004954  | 16q24.3       |
| 212191_x_at | 15 | RPL13          | AW574664  | 16q24.3       |
| 212734_x_at | 15 | RPL13          | AI186735  | 16q24.3       |
| 212933_x_at | 15 | RPL13          | AA961748  | 16q24.3       |
| 214351_x_at | 15 | RPL13          | AA789278  | 16q24.3       |
| 214976_at   | 14 | RPL13          | AI554467  | 16q24.3       |
| 200715_x_at | 15 | RPL13A         | BC000514  | 19q13.3       |

|             |    |          |           |                 |
|-------------|----|----------|-----------|-----------------|
| 200716_x_at | 15 | RPL13A   | BC000514  | 19q13.3         |
| 210646_x_at | 15 | RPL13A   | BC001675  | 19q13.3         |
| 211942_x_at | 15 | RPL13A   | BF979419  | 19q13.3         |
| 212790_x_at | 15 | RPL13A   | BF942308  | 19q13.3         |
| 200074_s_at | 15 | RPL14    | U16738    | 3p22-p21.2      |
| 213588_x_at | 15 | RPL14    | AA838274  | 3p22-p21.2      |
| 217266_at   | 15 | RPL15    | Z97353    | ---             |
| 200038_s_at | 15 | RPL17    | NM_000985 | 18q21           |
| 212270_x_at | 15 | RPL17    | BG168283  | 18q21           |
| 212537_x_at | 15 | RPL17    | BE733979  | 18q21           |
| 222216_s_at | 13 | RPL17L   | AK026857  | 11p15.5-p15.4   |
| 200022_at   | 15 | RPL18    | NM_000979 | 19q13           |
| 214335_at   | 11 | RPL18    | AI669349  | 19q13           |
| 222297_x_at | 13 | RPL18    | AV738806  | 19q13           |
| 200869_at   | 15 | RPL18A   | NM_000980 | 19p13           |
| 216383_at   | 15 | RPL18A   | U52111    | ---             |
| 200029_at   | 15 | RPL19    | NM_000981 | 17q11.2-q12     |
| 200012_x_at | 15 | RPL21    | NM_000982 | 13q12.2         |
| 217340_at   | 12 | RPL21    | AL024509  | ---             |
| 220960_x_at | 15 | RPL22    | NM_000983 | 1p36.3-p36.2    |
| 221726_at   | 15 | RPL22    | BE250348  | 1p36.3-p36.2    |
| 200888_s_at | 15 | RPL23    | NM_000978 | 17q             |
| 214744_s_at | 10 | RPL23    | AK021960  | ---             |
| 203012_x_at | 15 | RPL23A   | NM_000984 | 17q11           |
| 213084_x_at | 15 | RPL23A   | BF125158  | 17q11           |
| 221634_at   | 11 | RPL23AL1 | BC000596  | 2q14            |
| 200013_at   | 15 | RPL24    | NM_000986 | 3q12            |
| 214143_x_at | 15 | RPL24    | AI560573  | 3q12            |
| 222229_x_at | 15 | RPL26    | AL121871  | ---             |
| 218830_at   | 15 | RPL26L1  | NM_016093 | 5q35.2          |
| 200025_s_at | 15 | RPL27    | NM_000988 | 17q21.1-q21.2   |
| 213642_at   | 15 | RPL27    | BE312027  | 17q21.1-q21.2   |
| 203034_s_at | 15 | RPL27A   | NM_000990 | 11p15           |
| 212044_s_at | 14 | RPL27A   | BE737027  | 11p15           |
| 200003_s_at | 15 | RPL28    | NM_000991 | 19q13.4         |
| 200823_x_at | 15 | RPL29    | NM_000992 | 3p21.3-p21.2    |
| 213969_x_at | 15 | RPL29    | BF683426  | ---             |
| 216177_at   | 12 | RPL29    | AW582267  | ---             |
| 216570_x_at | 15 | RPL29    | AL096829  | ---             |
| 201217_x_at | 15 | RPL3     | NM_000967 | 22q13           |
| 211073_x_at | 15 | RPL3     | BC006483  | 22q13 /// 22q13 |
| 212039_x_at | 15 | RPL3     | BG339228  | 22q13           |
| 215963_x_at | 15 | RPL3     | Z98200    | 6q21            |
| 200062_s_at | 15 | RPL30    | L05095    | 8q22            |
| 200962_at   | 15 | RPL31    | AI348010  | 2q12.1          |
| 200963_x_at | 15 | RPL31    | NM_000993 | 2q12.1          |
| 200674_s_at | 15 | RPL32    | NM_000994 | 3p25-p24        |
| 200026_at   | 15 | RPL34    | NM_000995 | 4q25            |
| 200002_at   | 15 | RPL35    | NM_007209 | 9q34.1          |
| 217347_at   | 15 | RPL35    | Z82202    | ---             |



|             |    |         |           |                     |
|-------------|----|---------|-----------|---------------------|
| 213687_s_at | 15 | RPL35A  | BE968801  | 3q29-qter           |
| 219762_s_at | 15 | RPL36   | NM_015414 | 19p13.3             |
| 201406_at   | 15 | RPL36A  | NM_021029 | Xq22.1              |
| 207585_s_at | 15 | RPL36AL | NM_001001 | 14q21               |
| 200092_s_at | 15 | RPL37   | BF216701  | ---                 |
| 201429_s_at | 15 | RPL37A  | NM_000998 | 2q35                |
| 213459_at   | 15 | RPL37A  | AU155515  | 2q35                |
| 214041_x_at | 15 | RPL37A  | BE857772  | 2q35                |
| 202028_s_at | 15 | RPL38   | BC000603  | 17q23-q25           |
| 202029_x_at | 15 | RPL38   | NM_000999 | 17q23-q25           |
| 221943_x_at | 15 | RPL38   | AW303136  | 17q23-q25           |
| 208695_s_at | 15 | RPL39   | BC001019  | Xq22-q24            |
| 210115_at   | 15 | RPL39L1 | L05096    | 3q27                |
| 206768_at   | 15 | RPL3L   | NM_005061 | 16p13.3             |
| 200089_s_at | 15 | RPL4    | AI953886  | 15q22               |
| 201154_x_at | 15 | RPL4    | NM_000968 | 15q22               |
| 211710_x_at | 15 | RPL4    | BC005817  | 15q22 /// 15q22     |
| 201492_s_at | 15 | RPL41   | NM_021104 | 12q13               |
| 200937_s_at | 15 | RPL5    | NM_000969 | 1p22.1              |
| 213080_x_at | 15 | RPL5    | BF214492  | 1p22.1              |
| 200034_s_at | 15 | RPL6    | NM_000970 | 12q24.1             |
| 200717_x_at | 15 | RPL7    | NM_000971 | 8q13.3              |
| 212042_x_at | 15 | RPL7    | BG389744  | 8q13.3              |
| 217092_x_at | 15 | RPL7    | AL031589  | ---                 |
| 217740_x_at | 15 | RPL7A   | NM_000972 | 9q34                |
| 200936_at   | 15 | RPL8    | NM_000973 | 8q24.3              |
| 200032_s_at | 15 | RPL9    | NM_000661 | 4p13                |
| 201033_x_at | 15 | RPLP0   | NM_001002 | 12q24.2             |
| 208856_x_at | 15 | RPLP0   | BC003655  | 12q24.2             |
| 211720_x_at | 15 | RPLP0   | BC005863  | 12q24.2 /// 12q24.2 |
| 211972_x_at | 15 | RPLP0   | AI953822  | 12q24.2             |
| 214167_s_at | 15 | RPLP0   | AA555113  | ---                 |
| 200763_s_at | 15 | RPLP1   | NM_001003 | 15q22               |
| 200909_s_at | 15 | RPLP2   | NM_001004 | 11p15.5-p15.4       |
| 201011_at   | 15 | RPN1    | NM_002950 | 3q21.3-q25.2        |
| 208689_s_at | 15 | RPN2    | BC003560  | 20q12-q13.1         |
| 213399_x_at | 15 | RPN2    | AI560720  | 20q12-q13.1         |
| 213491_x_at | 15 | RPN2    | AL514285  | 20q12-q13.1         |
| 204245_s_at | 15 | RPP14   | NM_007042 | 3p21.2              |
| 218836_at   | 15 | RPP21   | NM_024839 | 6p21.32             |
| 203436_at   | 15 | RPP30   | NM_006413 | 10q23.32-q23.33     |
| 215743_at   | 10 | RPP38   | AL134489  | 10p13               |
| 213427_at   | 14 | RPP40   | NM_006638 | 6p25.1              |
| 217943_s_at | 15 | RPRC1   | NM_018067 | 1p34.3              |
| 200095_x_at | 15 | RPS10   | AA320764  | 6p21.31             |
| 200817_x_at | 15 | RPS10   | NM_001014 | 6p21.31             |
| 211542_x_at | 15 | RPS10   | BC004334  | ---                 |
| 214001_x_at | 14 | RPS10   | AW302047  | 6p21.31             |
| 217336_at   | 14 | RPS10   | AL118510  | ---                 |
| 200031_s_at | 15 | RPS11   | NM_001015 | 19q13.3             |

|             |    |         |           |               |
|-------------|----|---------|-----------|---------------|
| 213350_at   | 14 | RPS11   | BF680255  | 19q13.3       |
| 213377_x_at | 15 | RPS12   | AI799007  | 6q23.1        |
| 200018_at   | 15 | RPS13   | NM_001017 | 11p15         |
| 208645_s_at | 15 | RPS14   | AF116710  | ---           |
| 208646_at   | 15 | RPS14   | AF116710  | ---           |
| 200819_s_at | 15 | RPS15   | NM_001018 | 19p13.3       |
| 200781_s_at | 15 | RPS15A  | NM_001019 | 16p           |
| 201258_at   | 15 | RPS16   | NM_001020 | 19q13.1       |
| 213890_x_at | 15 | RPS16   | AI200589  | 19q13.1       |
| 201665_x_at | 15 | RPS17   | NM_001021 | 15q           |
| 211487_x_at | 15 | RPS17   | BC004886  | ---           |
| 212578_x_at | 15 | RPS17   | BF026595  | 22q12.3       |
| 216348_at   | 15 | RPS17   | AL049693  | ---           |
| 201049_s_at | 15 | RPS18   | NM_022551 | 6p21.3        |
| 202649_x_at | 15 | RPS19   | NM_001022 | 19q13.2       |
| 213414_s_at | 15 | RPS19   | BE259729  | 19q13.2       |
| 203107_x_at | 15 | RPS2    | NM_002952 | 16p13.3       |
| 212433_x_at | 15 | RPS2    | AA630314  | 16p13.3       |
| 217466_x_at | 14 | RPS2    | L48784    | ---           |
| 221798_x_at | 15 | RPS2    | AI183766  | 16p13.3       |
| 200949_x_at | 15 | RPS20   | NM_001023 | 8q12          |
| 214003_x_at | 15 | RPS20   | BF184532  | 8q12          |
| 216246_at   | 13 | RPS20   | AF113008  | 8q12          |
| 216247_at   | 12 | RPS20   | AF113008  | 8q12          |
| 200834_s_at | 15 | RPS21   | NM_001024 | 20q13.3       |
| 214097_at   | 15 | RPS21   | AW024383  | 20q13.3       |
| 200926_at   | 15 | RPS23   | NM_001025 | 5q14.1        |
| 200061_s_at | 15 | RPS24   | BC000523  | 10q22-q23     |
| 200091_s_at | 15 | RPS25   | AA888388  | 11q23.3       |
| 217753_s_at | 15 | RPS26   | NM_001029 | 12q13         |
| 200741_s_at | 15 | RPS27   | NM_001030 | 1q21          |
| 200017_at   | 15 | RPS27A  | NM_002954 | 2p16          |
| 218007_s_at | 15 | RPS27L  | BC003667  | 15q22.1       |
| 201094_at   | 15 | RPS29   | NM_001032 | 14q           |
| 208692_at   | 15 | rpS3    | U14990    | 11q13.3-q13.5 |
| 200099_s_at | 15 | RPS3A   | AL356115  | ---           |
| 201257_x_at | 15 | RPS3A   | NM_001006 | 4q31.2-q31.3  |
| 212391_x_at | 15 | RPS3A   | AI925635  | ---           |
| 200933_x_at | 15 | RPS4X   | NM_001007 | Xq13.1        |
| 213347_x_at | 15 | RPS4X   | AW132023  | Xq13.1        |
| 216342_x_at | 15 | RPS4X   | AL121916  | ---           |
| 201909_at   | 10 | RPS4Y1  | NM_001008 | Yp11.3        |
| 200024_at   | 15 | RPS5    | NM_001009 | 19q13.4       |
| 200081_s_at | 15 | RPS6    | BE741754  | 9p21          |
| 201254_x_at | 15 | RPS6    | NM_001010 | 9p21          |
| 209134_s_at | 15 | RPS6    | BC000524  | 9p21          |
| 203379_at   | 11 | RPS6KA1 | NM_002953 | 3             |
| 204906_at   | 15 | RPS6KA2 | BC002363  | 6q27          |
| 212912_at   | 15 | RPS6KA2 | AI992251  | 6q27          |
| 203843_at   | 14 | RPS6KA3 | AA906056  | Xp22.2-p22.1  |

|             |    |         |           |               |
|-------------|----|---------|-----------|---------------|
| 204632_at   | 11 | RPS6KA4 | NM_003942 | 11q11-q13     |
| 204635_at   | 15 | RPS6KA5 | NM_004755 | 14q31-q32.1   |
| 218909_at   | 15 | RPS6KC1 | NM_012424 | 1q41          |
| 200082_s_at | 15 | RPS7    | AI805587  | 2p25          |
| 213941_x_at | 15 | RPS7    | AI970731  | 2p25          |
| 200858_s_at | 15 | RPS8    | NM_001012 | 1p34.1-p32    |
| 214317_x_at | 15 | RPS9    | BE348997  | 19q13.4       |
| 217747_s_at | 15 | RPS9    | NM_001013 | 19q13.4       |
| 213179_at   | 15 | RQCD1   | BG289914  | 2q35          |
| 204802_at   | 15 | RRAD    | NM_004165 | 16q22         |
| 204803_s_at | 15 | RRAD    | NM_004165 | 16q22         |
| 201628_s_at | 15 | RRAGA   | NM_006570 | 9p22.1        |
| 221523_s_at | 15 | RRAGD   | AL138717  | 6q15-q16      |
| 221524_s_at | 15 | RRAGD   | AL138717  | 6q15-q16      |
| 212647_at   | 15 | RRAS    | NM_006270 | 19q13.3-qter  |
| 208456_s_at | 13 | RRAS2   | NM_012250 | 11p15.2       |
| 212589_at   | 15 | RRAS2   | AI753792  | 11p15.2       |
| 212590_at   | 15 | RRAS2   | AI431643  | 11p15.2       |
| 201204_s_at | 15 | RRBP1   | AA706065  | 20p12         |
| 203704_s_at | 15 | RREB1   | AW118862  | 6p25          |
| 201476_s_at | 15 | RRM1    | AI692974  | 11p15.5       |
| 201477_s_at | 15 | RRM1    | NM_001033 | 11p15.5       |
| 201890_at   | 13 | RRM2    | BE966236  | 2p25-p24      |
| 209773_s_at | 15 | RRM2    | BC001886  | 2p25-p24      |
| 216902_s_at | 12 | RRN3    | AF001549  | ---           |
| 218307_at   | 15 | RSAD1   | NM_018346 | 17q21.33      |
| 218347_at   | 15 | RSAFD1  | NM_018264 | 7q11.22       |
| 213694_at   | 15 | RSBN1   | AW027347  | 1p13.1        |
| 214583_at   | 10 | RSC1A1  | AI268381  | 1p36.1        |
| 201975_at   | 13 | RSN     | NM_002956 | 12q24.3       |
| 214684_at   | 15 | RSRFC4  | X63381    | 15q26         |
| 210999_s_at | 15 | RSS     | U66065    | 7p12-p11.2    |
| 201980_s_at | 15 | RSU1    | NM_012425 | 10p13         |
| 203594_at   | 15 | RTCD1   | NM_003729 | 1p21.3        |
| 41037_at    | 15 | RTEF1   | U63824    | 12p13.2-p13.3 |
| 210222_s_at | 14 | RTN1    | BC000314  | 14q21-q22     |
| 34408_at    | 15 | RTN2    | AF004222  | 19q13.32      |
| 219549_s_at | 15 | RTN3    | NM_006054 | 11q13         |
| 218243_at   | 15 | RUFY1   | NM_025158 | 5q35.3        |
| 219957_at   | 14 | RUFY2   | NM_017987 | 10q22.1       |
| 203724_s_at | 13 | RUFY3   | NM_014961 | 4q21.1        |
| 205529_s_at | 15 | RUNX1T1 | NM_004349 | 8q22          |
| 206949_s_at | 13 | RUSC1   | NM_014328 | 1q21-q22      |
| 203014_x_at | 15 | RUTBC3  | NM_015705 | 22q13.1-q13.2 |
| 214779_s_at | 15 | RUTBC3  | R51077    | 22q13.1-q13.2 |
| 201614_s_at | 13 | RUVBL1  | NM_003707 | 3q21          |
| 201459_at   | 15 | RUVBL2  | NM_006666 | 19q13.3       |
| 212507_at   | 15 | RW1     | D87446    | 2q11.2        |
| 219598_s_at | 15 | RWDD1   | NM_016104 | 6q13-q22.33   |
| 213555_at   | 10 | RWDD2   | AL049699  | 6q15          |

|             |    |         |           |                               |
|-------------|----|---------|-----------|-------------------------------|
| 205087_at   | 15 | RWDD3   | NM_015485 | 1p22.1                        |
| 202426_s_at | 14 | RXRA    | BE675800  | 9q34.3                        |
| 202449_s_at | 15 | RXRA    | NM_002957 | 9q34.3                        |
| 209148_at   | 15 | RXRB    | BC001167  | 6p21.3                        |
| 212438_at   | 15 | RY1     | BG252325  | 2p13.3                        |
| 212440_at   | 15 | RY1     | BG252325  | 2p13.3                        |
| 201846_s_at | 15 | RYBP    | NM_012234 | 3p14.2                        |
| 202853_s_at | 15 | RYK     | NM_002958 | 3q22                          |
| 214172_x_at | 15 | RYK     | BG032035  | 3q22                          |
| 207557_s_at | 15 | RYR2    | NM_001035 | 1q42.1-q43                    |
| 214044_at   | 15 | RYR2    | BE968750  | 1q42.1-q43                    |
| 206306_at   | 12 | RYR3    | NM_001036 | 15q14-q15                     |
| 200872_at   | 15 | S100A10 | NM_002966 | 1q21                          |
| 200660_at   | 15 | S100A11 | NM_005620 | 1q21                          |
| 208540_x_at | 15 | S100A11 | NM_021039 | ---                           |
| 205863_at   | 14 | S100A12 | NM_005621 | 1q21                          |
| 202598_at   | 15 | S100A13 | NM_005979 | 1q21 /// 1q21                 |
| 218677_at   | 13 | S100A14 | NM_020672 | 1q21.1                        |
| 203186_s_at | 15 | S100A4  | NM_002961 | 1q21                          |
| 217728_at   | 15 | S100A6  | NM_014624 | 1q21                          |
| 202917_s_at | 15 | S100A8  | NM_002964 | 1q21                          |
| 218370_s_at | 15 | S100PBP | NM_022753 | 1p34.3                        |
| 209503_s_at | 15 | S8      | AF035309  | 17q23-q25 /// 17q23-q25       |
| 202797_at   | 15 | SACM1L  | NM_014016 | 3p21.3                        |
| 213262_at   | 15 | SACS    | AI932370  | 13q12                         |
| 217946_s_at | 15 | SAE1    | NM_016402 | 19q13.33                      |
| 201748_s_at | 15 | SAFB    | NM_002967 | 19p13.3-p13.2                 |
| 32099_at    | 15 | SAFB2   | D50928    | 19p13.3                       |
| 213365_at   | 15 | SAH     | N64622    | 16p13.11                      |
| 213283_s_at | 15 | SALL2   | BG285616  | 14q11.1-q12                   |
| 212845_at   | 15 | SAMD4   | AB028976  | 14q22.2                       |
| 215495_s_at | 15 | SAMD4   | AL117523  | 14q22.2                       |
| 214967_at   | 11 | SAMD4A  | AU146983  | ---                           |
| 201569_s_at | 15 | SAMM50  | NM_015380 | 22q13.31                      |
| 201570_at   | 15 | SAMM50  | NM_015380 | 22q13.31                      |
| 220330_s_at | 14 | SAMSN1  | NM_022136 | 21q11                         |
| 37462_i_at  | 14 | SAP 62  | L21990    | 19p13.3-p13.2                 |
| 220367_s_at | 15 | SAP130  | NM_024545 | 2q21.1                        |
| 208740_at   | 15 | SAP18   | BF593650  | 13q12.11                      |
| 208741_at   | 13 | SAP18   | AW274856  | 13q12.11                      |
| 208742_s_at | 15 | SAP18p  | U78303    | 13q12.11                      |
| 35820_at    | 15 | SAP-3   | M76477    | 5q31.3-q33.1 /// 5q31.3-q33.1 |
| 204899_s_at | 11 | SAP30   | BF247098  | 4q34.1                        |
| 204900_x_at | 15 | SAP30   | NM_003864 | 4q34.1                        |
| 219129_s_at | 14 | SAP30L  | NM_024632 | 5q33.2                        |
| 209229_s_at | 14 | SAPS1   | BC002799  | 19q13.42                      |
| 202791_s_at | 15 | SAPS2   | NM_014678 | 22q13.33                      |
| 217928_s_at | 15 | SAPS3   | NM_018312 | 11q13                         |

|             |    |             |           |                |
|-------------|----|-------------|-----------|----------------|
| 201542_at   | 15 | SAR1        | AY008268  | 10q22.2        |
| 201543_s_at | 15 | SAR1A       | NM_020150 | 10q22.2        |
| 218254_s_at | 15 | SAR1B       | NM_016103 | 5q31.2         |
| 202035_s_at | 14 | SARP2       | AF017987  | 8p12-p11.1     |
| 202036_s_at | 15 | SARP2       | AF017987  | 8p12-p11.1     |
| 202037_s_at | 15 | SARP2       | AF017987  | 8p12-p11.1     |
| 200802_at   | 15 | SARS        | NM_006513 | 1p13.3-p13.1   |
| 200051_at   | 15 | SART1       | NM_005146 | 11q13.1        |
| 218854_at   | 15 | SART2       | NM_013352 | 6q22           |
| 200069_at   | 15 | SART3       | AI656011  | 12q24.1        |
| 209127_s_at | 11 | SART3       | AW173076  | 12q24.1        |
| 209128_s_at | 15 | SART3       | AI656011  | 12q24.1        |
| 203226_s_at | 13 | SAS         | AL514076  | 12q13.3        |
| 203227_s_at | 14 | SAS         | AL514076  | 12q13.3        |
| 209486_at   | 13 | SAS10       | BC004546  | 4q13.3         |
| 213236_at   | 13 | SASH1       | AK025495  | 6q24.3         |
| 41644_at    | 15 | SASH1       | AB018333  | 6q24.3         |
| 203455_s_at | 15 | SAT         | NM_002970 | Xp22.1         |
| 213988_s_at | 15 | SAT         | BE971383  | Xp22.1         |
| 203408_s_at | 15 | SATB1       | NM_002971 | 3p23           |
| 213282_at   | 15 | SATL1       | BE501952  | Xq21.1         |
| 213289_at   | 13 | SATL1       | BE221922  | Xq21.1-q21.2   |
| 218276_s_at | 15 | SAV1        | AI679398  | 14q13-q23      |
| 209820_s_at | 12 | SAZD        | BC002361  | 16p13.3        |
| 39835_at    | 14 | SBF1        | U93181    | 22q13.33       |
| 211423_s_at | 15 | SC5DL; ERG3 | D85181    | 11q23.3        |
| 206667_s_at | 11 | SCAMP1      | AF005037  | 5q13.3-q14.1   |
| 206668_s_at | 13 | SCAMP1      | NM_004866 | 5q13.3-q14.1   |
| 212416_at   | 15 | SCAMP1      | AV745949  | 5q13.3-q14.1   |
| 212417_at   | 14 | SCAMP1      | BF058944  | 5q13.3-q14.1   |
| 212425_at   | 15 | SCAMP1      | AL049223  | 5q13.3-q14.1   |
| 218143_s_at | 15 | SCAMP2      | NM_005697 | 15q23-q25      |
| 201771_at   | 15 | SCAMP3      | NM_005698 | 1q21           |
| 212699_at   | 15 | SCAMP5      | BE222801  | 15q23          |
| 218206_x_at | 15 | SCAND1      | NM_016558 | 20q11.1-q11.23 |
| 212329_at   | 15 | SCAP        | D83782    | 3p21.31        |
| 201819_at   | 13 | SCARB1      | NM_005505 | 12q24.31       |
| 201646_at   | 15 | SCARB2      | AA885297  | ---            |
| 201647_s_at | 15 | SCARB2      | NM_005506 | 4q21.21-q21.22 |
| 213984_at   | 11 | SCC-112     | AW991219  | 4p14           |
| 201825_s_at | 15 | SCCPDH      | NM_016002 | 1q44           |
| 201826_s_at | 15 | SCCPDH      | NM_016002 | 1q44           |
| 200832_s_at | 15 | Scd         | AB032261  | 10q23-q24      |
| 211569_s_at | 15 | SCHAD       | AF001903  | 4q22-q26       |
| 204030_s_at | 15 | SCHIP1      | NM_014575 | 3q25.33        |
| 214075_at   | 14 | SCIRP10     | AI984136  | 1q32.3         |
| 59705_at    | 15 | SCLY        | AA911739  | 2q37.3         |
| 221216_s_at | 15 | SCMH1       | NM_012236 | 1p34           |
| 218793_s_at | 13 | SCML1       | BF001786  | Xp22.2-p22.1   |
| 207413_s_at | 15 | SCN5A       | NM_000335 | 3p21           |

|             |    |         |           |                 |
|-------------|----|---------|-----------|-----------------|
| 205241_at   | 13 | SCO2    | NM_005138 | 22q13.33        |
| 201339_s_at | 15 | SCP2    | NM_002979 | 1p32            |
| 211733_x_at | 15 | SCP2    | BC005911  | 1p32 /// 1p32   |
| 218217_at   | 15 | SCPEP1  | NM_021626 | 17q23.2         |
| 209868_s_at | 15 | scr2    | D28482    | 2q24.3          |
| 205475_at   | 15 | SCRG1   | NM_007281 | 4q31-q32        |
| 201462_at   | 15 | SCRN1   | NM_014766 | 7p14.3-p14.1    |
| 219234_x_at | 15 | SCRN3   | NM_024583 | 2q31.1          |
| 202541_at   | 15 | SCYE1   | BF589679  | 4q25            |
| 202542_s_at | 15 | SCYE1   | NM_004757 | 4q25            |
| 205607_s_at | 14 | SCYL3   | NM_020423 | 1q23.3          |
| 218607_s_at | 15 | SDAD1   | NM_018115 | 4q21.21         |
| 212154_at   | 15 | SDC2    | AI380298  | 8q22-q23        |
| 212157_at   | 15 | SDC2    | AI380298  | 8q22-q23        |
| 212158_at   | 15 | SDC2    | AL577322  | 8q22-q23        |
| 202071_at   | 15 | SDC4    | NM_002999 | 20q12           |
| 200958_s_at | 15 | SDCBP   | NM_005625 | 8q12            |
| 218649_x_at | 15 | SDCCAG1 | NM_004713 | 14q22           |
| 218427_at   | 12 | SDCCAG3 | NM_006643 | 9q34.3          |
| 203090_at   | 15 | SDF2    | NM_006923 | 17q11.2         |
| 218681_s_at | 13 | SDF2L1  | NM_022044 | 22q11.21        |
| 217855_x_at | 15 | SDF4    | NM_016547 | 1p36.33         |
| 202228_s_at | 15 | SDFR1   | NM_017455 | 15q22           |
| 201093_x_at | 15 | SDHA    | NM_004168 | 5p15            |
| 222021_x_at | 15 | SDHA    | AI348006  | 3q29            |
| 202675_at   | 15 | SDHB    | NM_003000 | 1p36.1-p35      |
| 214166_at   | 10 | SDHB    | AW294107  | 1p36.1-p35      |
| 202004_x_at | 15 | SDHC    | NM_003001 | 1q21            |
| 202026_at   | 15 | SDHD    | NM_003002 | 11q23           |
| 218711_s_at | 15 | SDPR    | NM_004657 | 2q32-q33        |
| 220180_at   | 12 | SE57-1  | NM_025214 | 18q21           |
| 201290_at   | 15 | SEC11L1 | NM_014300 | 15q25.2         |
| 216274_s_at | 15 | SEC11L1 | N99438    | 15q25.2         |
| 207707_s_at | 15 | SEC13L1 | NM_030673 | 3p25-p24        |
| 202084_s_at | 15 | SEC14L1 | NM_003003 | 17q25.1-17q25.2 |
| 209206_at   | 15 | SEC22L1 | AV701283  | 1q21.2-q21.3    |
| 209207_s_at | 11 | SEC22L1 | BC001364  | 1q21.2-q21.3    |
| 214257_s_at | 14 | SEC22L1 | AA890010  | 1q21.2-q21.3    |
| 218703_at   | 14 | SEC22L2 | NM_012430 | 3q21.1          |
| 204344_s_at | 11 | SEC23A  | NM_006364 | 14q13.3         |
| 212887_at   | 15 | SEC23A  | AI753659  | 14q13.3         |
| 201583_s_at | 12 | SEC23B  | NM_006363 | 20p11.23        |
| 210293_s_at | 15 | SEC23B  | BC005032  | 20p11.23        |
| 212900_at   | 15 | SEC24A  | AJ131244  | 5q31.2          |
| 212902_at   | 14 | SEC24A  | BE645231  | 5q31.2          |
| 202798_at   | 15 | SEC24B  | NM_006323 | 4q25            |
| 202361_at   | 15 | SEC24C  | NM_004922 | 10q22.3         |
| 202375_at   | 15 | SEC24D  | NM_014822 | 4q27            |
| 222127_s_at | 15 | SEC3    | AK023461  | 4q12            |
| 200945_s_at | 15 | SEC31L1 | NM_014933 | 4q21.3          |

|             |    |               |           |                   |
|-------------|----|---------------|-----------|-------------------|
| 215009_s_at | 15 | SEC31L1       | U92014    | 4q21.3            |
| 219499_at   | 14 | SEC61A2       | NM_018144 | 10p14             |
| 203133_at   | 15 | SEC61B        | NM_006808 | 9q22.32-q31.3     |
| 203484_at   | 15 | SEC61G        | NM_014302 | 7p11.2            |
| 208942_s_at | 15 | Sec62         | U93239    | 3q26.2-q27        |
| 208943_s_at | 15 | Sec62         | U93239    | 3q26.2-q27        |
| 201914_s_at | 12 | SEC63         | NM_007214 | 6q21              |
| 201915_at   | 11 | SEC63         | NM_007214 | 6q21              |
| 201916_s_at | 15 | SEC63         | NM_007214 | 6q21              |
| 218265_at   | 15 | SECISBP2      | NM_024077 | 9q22.2            |
| 213492_at   | 13 | SEDC; COL11A3 | X06268    | 12q13.11-q13.2    |
| 221931_s_at | 15 | SEH1L         | AV701173  | 18p11.21          |
| 206211_at   | 11 | SELE          | NM_000450 | 1q22-q25          |
| 214433_s_at | 15 | SELENBP1      | NM_003944 | 1q21-q22          |
| 204563_at   | 12 | SELL          | NM_000655 | 1q23-q25          |
| 206049_at   | 12 | SELP          | NM_003005 | 1q22-q25          |
| 217811_at   | 15 | SELT          | NM_016275 | 3q25.1 /// 3q25.1 |
| 206805_at   | 10 | SEMA3A        | NM_006080 | 7p12.1            |
| 203788_s_at | 14 | SEMA3C        | AI962897  | 7q21-q31          |
| 203789_s_at | 15 | SEMA3C        | NM_006379 | 7q21-q31          |
| 219689_at   | 15 | SEMA3G        | NM_020163 | 3p21.31           |
| 35666_at    | 15 | SEMA4         | U38276    | 3p21.3            |
| 46665_at    | 15 | SEMA4C        | AI949392  | 2q11.2            |
| 219194_at   | 14 | SEMA4G        | NM_017893 | 10q24.32          |
| 205405_at   | 15 | SEMA5A        | NM_003966 | 5p15.2            |
| 213169_at   | 15 | SEMA5A        | BG109855  | 5p15.2            |
| 215028_at   | 10 | SEMA6A        | AB002438  | 5q23.1            |
| 215479_at   | 13 | SEMA6A        | AK000787  | ---               |
| 220454_s_at | 11 | SEMA6A        | NM_020796 | 5q23.1            |
| 220574_at   | 12 | SEMA6D        | NM_024966 | 15q15.2           |
| 203871_at   | 15 | SENP3         | NM_015670 | 17p13             |
| 213184_at   | 12 | SENP5         | N48361    | ---               |
| 57703_at    | 15 | SENP5         | N32782    | 3q29              |
| 202319_at   | 14 | SENP6         | NM_015571 | 6q13-q14.3        |
| 200902_at   | 15 | SEP15         | NM_004261 | 1p31              |
| 213666_at   | 15 | SEP2          | AK026589  | Xq25              |
| 208939_at   | 15 | SEPHS1        | AV682679  | 10p14             |
| 208941_s_at | 13 | SEPHS1        | AV682679  | 10p14             |
| 200961_at   | 15 | SEPHS2        | NM_012248 | 16p12.1           |
| 201427_s_at | 15 | SEPP1         | NM_005410 | 5q31              |
| 212698_s_at | 15 | SEPT10        | BF966021  | 2q13              |
| 214720_x_at | 15 | SEPT10        | BF981643  | 2q13              |
| 201307_at   | 15 | SEPT11        | AL534972  | 4q21.22           |
| 214293_at   | 15 | SEPT11        | AI539361  | 4q21.22           |
| 200015_s_at | 15 | SEPT2         | AI191427  | 2q37              |
| 200778_s_at | 15 | SEPT2         | AI191427  | 2q37              |
| 209767_s_at | 14 | SEPT5         | AA702163  | 22q11.21          |
| 214298_x_at | 12 | SEPT6         | AL568374  | Xq25              |
| 213151_s_at | 15 | SEPT7         | AU157515  | 7p14.3-p14.1      |
| 217721_at   | 15 | SEPT7         | NM_001788 | 7p14.3-p14.1      |

|             |    |          |           |                     |
|-------------|----|----------|-----------|---------------------|
| 201194_at   | 15 | SEPW1    | NM_003009 | 19q13.3             |
| 209669_s_at | 15 | SERBP1   | BC003049  | 1p31-p22            |
| 210466_s_at | 15 | SERBP1   | BC002488  | 1p31-p22            |
| 219982_s_at | 11 | SERF1B   | NM_022978 | 5q12.2-q13.3        |
| 217756_x_at | 15 | SERF2    | NM_005770 | 15q15.1             |
| 211769_x_at | 15 | SERINC3  | BC006088  | 20q13.1-13.3        |
| 212812_at   | 15 | SERINC5  | AI700633  | ---                 |
| 200969_at   | 15 | SERP1    | NM_014445 | 3q25.1              |
| 200970_s_at | 15 | SERP1    | AL136807  | 3q25.1              |
| 200971_s_at | 15 | SERP1    | NM_014445 | 3q25.1              |
| 212268_at   | 14 | SERPINB1 | NM_030666 | 6p25                |
| 213572_s_at | 14 | SERPINB1 | AI554300  | 6p25                |
| 211474_s_at | 15 | SERPINB6 | BC004948  | ---                 |
| 209723_at   | 12 | SERPINB9 | BC002538  | 6p25                |
| 212190_at   | 15 | SERPINE2 | AL541302  | 2q33-q35            |
| 202283_at   | 15 | SERPINF1 | NM_002615 | 17p13.1             |
| 200986_at   | 15 | SERPING1 | NM_000062 | 11q12-q13.1         |
| 207714_s_at | 15 | SERPINH1 | NM_004353 | 11q13.5 /// 11q13.5 |
| 205352_at   | 15 | SERPINI1 | NM_005025 | 3q26.2              |
| 202656_s_at | 15 | SERTAD2  | BG107456  | 2p15                |
| 202657_s_at | 15 | SERTAD2  | NM_014755 | 2p15                |
| 219382_at   | 15 | SERTAD3  | NM_013368 | 19q13.2             |
| 218346_s_at | 15 | SESN1    | NM_014454 | 6q21                |
| 200630_x_at | 15 | SET      | AV702810  | 9q34                |
| 200631_s_at | 15 | SET      | NM_003011 | 9q34                |
| 210231_x_at | 15 | SET      | D45198    | 9q34                |
| 213047_x_at | 15 | SET      | AI278616  | 9q34                |
| 213048_s_at | 15 | SET      | W26593    | 9q34                |
| 215780_s_at | 14 | SET      | Z95126    | 9q34                |
| 40189_at    | 15 | SET      | M93651    | 9q34                |
| 215373_x_at | 13 | SET07    | AK022213  | 13q11-q13           |
| 220200_s_at | 13 | SET07    | NM_020382 | 13q11-q13           |
| 203155_at   | 15 | SETDB1   | NM_012432 | 1q21                |
| 210755_at   | 13 | SF       | U46010    | 7q21.1              |
| 208313_s_at | 15 | SF1      | NM_004630 | 11q13               |
| 201356_at   | 15 | SF3A1    | NM_005877 | ---                 |
| 201357_s_at | 14 | SF3A1    | NM_005877 | 22q12.2             |
| 216457_s_at | 15 | SF3A1    | AK026080  | ---                 |
| 203818_s_at | 15 | SF3A3    | NM_006802 | 1p34.2              |
| 201070_x_at | 13 | SF3B1    | AI739389  | 2q33.1              |
| 201071_x_at | 15 | SF3B1    | NM_012433 | 2q33.1              |
| 214305_s_at | 13 | SF3B1    | AW003030  | 2q33.1              |
| 200619_at   | 14 | SF3B2    | NM_006842 | 11q13.1 /// 11q13.1 |
| 200687_s_at | 15 | SF3B3    | D13642    | 16q22.1 /// 16q22.1 |
| 200688_at   | 11 | SF3B3    | D13642    | 16q22.1             |
| 209044_x_at | 15 | SF3B4    | BC004273  | 1q12-q21            |
| 221263_s_at | 15 | SF3B5    | NM_031287 | 6q24.1 /// 6q24.1   |
| 201149_s_at | 15 | SFD      | U67195    | 22q12.1-q13.2       |
| 221504_s_at | 15 | SFD      | AF112204  | 8p22-q22.3          |
| 213370_s_at | 13 | SFMBT1   | BF057298  | 3p21.31             |



|             |    |         |           |                          |
|-------------|----|---------|-----------|--------------------------|
| 33322_i_at  | 15 | SFN     | X57348    | 1p35.3                   |
| 33323_r_at  | 10 | SFN     | X57348    | 1p35.3                   |
| 201585_s_at | 14 | SFPQ    | NM_005066 | 1p34.3                   |
| 201586_s_at | 15 | SFPQ    | NM_005066 | 1p34.3                   |
| 214016_s_at | 15 | SFPQ    | AL558875  | 1p34.3                   |
| 221768_at   | 15 | SFPQ    | AV705803  | 1p34.3                   |
| 204051_s_at | 13 | SFRP4   | NM_003014 | 7p14.1                   |
| 208863_s_at | 15 | SFRS1   | M72709    | 17q21.3-q22              |
| 211784_s_at | 15 | SFRS1   | BC006181  | ---                      |
| 200892_s_at | 15 | SFRS10  | BC000451  | 3q26.2-q27               |
| 200893_at   | 15 | SFRS10  | NM_004593 | 3q26.2-q27               |
| 200685_at   | 14 | SFRS11  | AU146237  | 1p31                     |
| 200686_s_at | 15 | SFRS11  | NM_004768 | 1p31                     |
| 213742_at   | 13 | SFRS11  | AW241752  | 1p31                     |
| 212721_at   | 15 | SFRS12  | AI810380  | 5q12.3                   |
| 212001_at   | 15 | SFRS14  | AB002363  | 19p12                    |
| 213505_s_at | 13 | SFRS14  | BG252853  | 19p12                    |
| 214092_x_at | 15 | SFRS14  | AI928127  | 19p12                    |
| 64371_at    | 12 | SFRS14  | AI978718  | 19p12                    |
| 204978_at   | 13 | SFRS16  | NM_007056 | 19q13.3                  |
| 200753_x_at | 15 | SFRS2   | BE866585  | 17q25.3                  |
| 200754_x_at | 15 | SFRS2   | NM_003016 | 17q25.3                  |
| 214882_s_at | 15 | SFRS2   | BG254869  | 17q25.3                  |
| 206989_s_at | 15 | SFRS2IP | NM_004719 | 12q13.11                 |
| 213850_s_at | 12 | SFRS2IP | AI984932  | 12q13.11                 |
| 202899_s_at | 15 | SFRS3   | NM_003017 | 6p21                     |
| 208672_s_at | 15 | SFRS3   | BC000914  | 6p21                     |
| 208673_s_at | 15 | SFRS3   | AL514794  | 6p21                     |
| 201696_at   | 15 | SFRS4   | NM_005626 | 1p35.2                   |
| 203380_x_at | 15 | SFRS5   | NM_006925 | 14q24                    |
| 212266_s_at | 15 | SFRS5   | AW084582  | 14q24                    |
| 208804_s_at | 15 | SFRS6   | AL031681  | 20q12-q13.1              |
| 213649_at   | 15 | SFRS7   | AA524053  | 2p22.1                   |
| 214141_x_at | 15 | SFRS7   | BF033354  | 2p22.1                   |
| 202774_s_at | 14 | SFRS8   | NM_004592 | 12q24.33                 |
| 202775_s_at | 15 | SFRS8   | NM_004592 | 12q24.33                 |
| 200044_at   | 15 | SFRS9   | NM_003769 | 12q24.31                 |
| 201698_s_at | 15 | SFRS9   | NM_003769 | 12q24.31                 |
| 213936_x_at | 14 | SFTPB   | AW276646  | 2p12-p11.2               |
| 220974_x_at | 15 | SFXN3   | NM_030971 | 10q24.32 ///<br>10q24.32 |
| 205120_s_at | 15 | SGCB    | U29586    | 4q12                     |
| 213543_at   | 14 | SGCD    | AA570453  | 5q33-q34                 |
| 204688_at   | 15 | SGCE    | NM_003919 | 7q21-q22                 |
| 207302_at   | 15 | SGCG    | NM_000231 | 13q12                    |
| 201739_at   | 15 | SGK     | NM_005627 | 6q23                     |
| 203889_at   | 15 | SGNE1   | NM_003020 | 15q13-q14                |
| 212321_at   | 15 | SGPL1   | BE999972  | 10q21                    |
| 212322_at   | 15 | SGPL1   | BE999972  | 10q21                    |
| 221268_s_at | 12 | SGPP1   | NM_030791 | 14q23.2 /// 14q23.2      |

|             |    |                   |           |                           |
|-------------|----|-------------------|-----------|---------------------------|
|             |    |                   |           | /// 14q23.2               |
| 35626_at    | 15 | SGSH              | U30894    | 17q25.3                   |
| 201396_s_at | 11 | SGTA              | NM_003021 | 19p13                     |
| 222140_s_at | 14 | SH120; AL844549.1 | AK021758  | 1p36.13-q31.3             |
| 40149_at    | 15 | SH2B              | AL049924  | 16p12.1                   |
| 202060_at   | 15 | SH2BP1            | NM_014633 | 11p15.3                   |
| 204979_s_at | 15 | SH3BGR            | NM_007341 | 21q22.3                   |
| 201311_s_at | 15 | SH3BGRL           | AL515318  | Xq13.3                    |
| 201312_s_at | 15 | SH3BGRL           | NM_003022 | Xq13.3                    |
| 221269_s_at | 14 | SH3BGRL3          | NM_031286 | 1p35-p34.3 /// 1p35-p34.3 |
| 209370_s_at | 10 | SH3BP2            | BE502377  | 4p16.3                    |
| 201810_s_at | 12 | SH3BP5            | AL562152  | 3p24.3                    |
| 201811_x_at | 15 | SH3BP5            | NM_004844 | 3p24.3                    |
| 209253_at   | 15 | SH3D4             | AF037261  | 8p21.2                    |
| 201851_at   | 12 | SH3GL1            | NM_003025 | 19p13.3                   |
| 205637_s_at | 14 | SH3GL3            | NM_003027 | 15q24                     |
| 209090_s_at | 15 | SH3GLB1           | AL049597  | 1p22                      |
| 218813_s_at | 12 | SH3GLB2           | NM_020145 | 9q34                      |
| 211819_s_at | 11 | SH3P12            | AF136381  | 10q23.3-q24.1             |
| 204019_s_at | 15 | SH3YL1            | NM_015677 | 2p25.3                    |
| 213307_at   | 12 | SHANK             | AF131790  | 11q13.2                   |
| 201469_s_at | 11 | SHC1              | AI809967  | 1q21                      |
| 214853_s_at | 15 | SHC1              | AI091079  | 1q22                      |
| 213464_at   | 15 | SHC2              | AV705938  | 19p13.3                   |
| 219493_at   | 15 | SHCBP1            | NM_024745 | 16q11.2                   |
| 202276_at   | 15 | SHFM1             | NM_006304 | 7q21.3-q22.1              |
| 214095_at   | 13 | SHMT2             | AW190316  | 12q13.2                   |
| 214096_s_at | 15 | SHMT2             | AW190316  | 12q13.2                   |
| 214437_s_at | 14 | SHMT2             | NM_005412 | 12q12-q14                 |
| 202777_at   | 15 | SHOC2             | NM_007373 | 10q25                     |
| 214527_s_at | 15 | SHS               | AB041836  | Xp11.23                   |
| 209848_s_at | 11 | SI                | U01874    | 12q13-q14                 |
| 202980_s_at | 15 | SIAH1             | AI953523  | 16q12                     |
| 202981_x_at | 15 | SIAH1             | NM_003031 | 16q12                     |
| 221833_at   | 15 | SIAH1             | AV700132  | 16q12                     |
| 221834_at   | 13 | SIAH1             | AV700132  | 16q12.1                   |
| 201998_at   | 15 | SIAT1             | AI743792  | 3q27-q28                  |
| 213355_at   | 13 | SIAT10            | AI989567  | 3q12.2                    |
| 221551_x_at | 11 | SIAT7D            | AW044319  | 9q34                      |
| 208924_at   | 15 | Sid1669           | AB024703  | 1pter-p22.1               |
| 56256_at    | 15 | SIDT2             | AA150165  | 11q23.2                   |
| 218921_at   | 15 | SIGIRR            | NM_021805 | 11p15.5                   |
| 52940_at    | 14 | SIGIRR            | AA085764  | 11p15.5                   |
| 213221_s_at | 12 | SIK2              | AB018324  | 11q23.2                   |
| 204665_at   | 15 | SIKE              | NM_025073 | 1p13.1                    |
| 221705_s_at | 12 | SIKE              | BC005934  | 1p13.1 /// 1p13.1         |
| 218046_s_at | 15 | SIL1              | BE964789  | 10q22.1                   |
| 200704_at   | 15 | SIMPLE            | AB034747  | 16p13.3-p12               |
| 210880_s_at | 12 | SIN               | AB001467  | 14q11.2-q12               |

|             |    |              |           |               |
|-------------|----|--------------|-----------|---------------|
| 209352_s_at | 11 | SIN3B        | AB014600  | 19p13.12      |
| 39705_at    | 14 | SIN3B        | AB014600  | 19p13.12      |
| 201381_x_at | 15 | SIP          | AF057356  | 1q24-q25      |
| 210691_s_at | 15 | SIP          | AF275803  | 1q24-q25      |
| 205063_at   | 14 | SIP1         | NM_003616 | 14q13         |
| 209376_x_at | 12 | SIP1         | AF030234  | 12q13.11      |
| 210779_x_at | 15 | SIP1-beta    | AB037701  | 14q13         |
| 211115_x_at | 15 | SIP1-delta   | AB037703  | 14q13         |
| 211114_x_at | 15 | SIP1-gamma   | AB037702  | 14q13         |
| 204164_at   | 10 | SIPA1        | NM_006747 | 11q13         |
| 202254_at   | 10 | SIPA1L1      | AB007900  | 14q24.1       |
| 202255_s_at | 10 | SIPA1L1      | NM_015556 | 14q24.1       |
| 218878_s_at | 15 | SIRT1        | NM_012238 | 10q22.1       |
| 220605_s_at | 15 | SIRT2        | NM_012237 | 19q13         |
| 219185_at   | 15 | SIRT5        | NM_012241 | 6p23          |
| 221010_s_at | 13 | SIRT5        | NM_031244 | 6p23 /// 6p23 |
| 218797_s_at | 14 | SIRT7        | NM_016538 | 17q25         |
| 218225_at   | 15 | SITPEC       | NM_016581 | 19p13.2       |
| 203489_at   | 15 | SIVA         | NM_006427 | 14q32.33      |
| 222030_at   | 15 | SIVA         | AW024335  | 14q32.33      |
| 210792_x_at | 15 | SIVA; CD27BP | AF033111  | 14q32.33      |
| 209043_at   | 15 | SK1          | AF033026  | 4q24          |
| 217786_at   | 13 | SKB1         | NM_006109 | 14q11.2-q21   |
| 215424_s_at | 15 | SKIIP        | AV689564  | 14q24.3       |
| 217591_at   | 12 | SKIL         | BF725121  | 3q26          |
| 202781_s_at | 14 | SKIP         | AI806031  | 17p13.3       |
| 202782_s_at | 12 | SKIP         | NM_016532 | 17p13.3       |
| 200711_s_at | 15 | SKP1A        | BE964043  | 5q31          |
| 200718_s_at | 15 | SKP1A        | AA927664  | 5q31          |
| 200719_at   | 13 | SKP1A        | BE964043  | 5q31          |
| 207974_s_at | 15 | SKP1A        | NM_006930 | 5q31          |
| 203625_x_at | 15 | SKP2         | BG105365  | 5p13          |
| 206052_s_at | 15 | SLBP         | NM_006527 | 4p16.3        |
| 203123_s_at | 15 | SLC11A2      | AU154469  | 12q13         |
| 204404_at   | 15 | SLC12A2      | NM_001046 | 5q23.3        |
| 215274_at   | 10 | SLC12A3      | AI627943  | 16q13         |
| 220740_s_at | 15 | SLC12A6      | NM_005135 | 15q13-q15     |
| 218066_at   | 15 | SLC12A7      | NM_006598 | 5p15          |
| 220371_s_at | 14 | SLC12A9      | NM_020246 | 7q22          |
| 205856_at   | 10 | SLC14A1      | NM_015865 | 18q11-q12     |
| 202234_s_at | 15 | SLC16A1      | BF511091  | 1p12          |
| 202235_at   | 15 | SLC16A1      | BF511091  | 1p12          |
| 202236_s_at | 15 | SLC16A1      | NM_003051 | 1p12          |
| 209900_s_at | 15 | SLC16A1      | AL162079  | 1p12          |
| 202855_s_at | 15 | SLC16A3      | AL513917  | 17q25         |
| 202856_s_at | 15 | SLC16A3      | NM_004207 | 17q25         |
| 217691_x_at | 15 | SLC16A3      | AA853175  | 17q25         |
| 213590_at   | 12 | SLC16A5      | AA705628  | 17q25.2       |
| 207057_at   | 12 | SLC16A7      | NM_004731 | 12q13         |
| 213549_at   | 13 | SLC18A2      | AI890972  | 10q25         |

|             |    |          |           |                     |
|-------------|----|----------|-----------|---------------------|
| 213664_at   | 11 | SLC1A1   | AW235061  | 9p24                |
| 202800_at   | 15 | SLC1A3   | NM_004172 | 5p13                |
| 209610_s_at | 14 | SLC1A4   | BF340083  | 2p15-p13            |
| 212810_s_at | 15 | SLC1A4   | W72527    | 2p15-p13            |
| 212811_x_at | 15 | SLC1A4   | AI889380  | 2p15-p13            |
| 208916_at   | 12 | SLC1A5   | AF105230  | 19q13.3             |
| 201920_at   | 15 | SLC20A1  | NM_005415 | 2q11-q14            |
| 207408_at   | 11 | SLC22A14 | NM_004803 | 3p21.3              |
| 218675_at   | 10 | SLC22A17 | NM_020372 | 14q11.2             |
| 204981_at   | 15 | SLC22A18 | NM_002555 | 11p15.5             |
| 205896_at   | 12 | SLC22A4  | NM_003059 | 5q31.1              |
| 209236_at   | 14 | SLC23A2  | AL389886  | ---                 |
| 57588_at    | 11 | SLC24A3  | R62432    | 20p13               |
| 207088_s_at | 15 | SLC25A11 | NM_003562 | 17p13.3             |
| 203339_at   | 15 | SLC25A12 | AI887457  | 2q24                |
| 203340_s_at | 15 | SLC25A12 | AI887457  | 2q24                |
| 203775_at   | 15 | SLC25A13 | NM_014251 | 7q21.3              |
| 204587_at   | 13 | SLC25A14 | NM_003951 | Xq24                |
| 218653_at   | 13 | SLC25A15 | NM_014252 | 13q14               |
| 210686_x_at | 15 | SLC25A16 | BC001407  | 10q21.3             |
| 214140_at   | 13 | SLC25A16 | AI827990  | 10q21.3             |
| 211754_s_at | 14 | SLC25A17 | BC005957  | 22q13.2 /// 22q13.2 |
| 203658_at   | 15 | SLC25A20 | BC001689  | 3p21.31             |
| 218725_at   | 10 | SLC25A22 | NM_024698 | 11p15.5             |
| 220182_at   | 10 | SLC25A23 | NM_024103 | 19p13.3             |
| 204342_at   | 13 | SLC25A24 | NM_013386 | 1p13.3              |
| 200030_s_at | 15 | SLC25A3  | NM_002635 | 12q23               |
| 221020_s_at | 15 | SLC25A32 | NM_030780 | 8q22.3 /// 8q22.3   |
| 201917_s_at | 15 | SLC25A36 | NM_018155 | 3q23                |
| 202825_at   | 15 | SLC25A4  | NM_001151 | 4q35                |
| 214821_at   | 14 | SLC25A4  | AF052119  | ---                 |
| 200657_at   | 15 | SLC25A5  | NM_001152 | Xq24-q26            |
| 212085_at   | 15 | SLC25A6  | AA916851  | Xp22.32 and Yp      |
| 212826_s_at | 15 | SLC25A6  | AI961224  | Xp22.32 and Yp      |
| 214951_at   | 15 | SLC26A10 | AL050358  | 12q13               |
| 205097_at   | 11 | SLC26A2  | AI025519  | 5q31-q34            |
| 222217_s_at | 15 | SLC27A3  | BC003654  | 1q22                |
| 219932_at   | 15 | SLC27A6  | NM_014031 | 5q31.1              |
| 201801_s_at | 15 | SLC29A1  | NM_004955 | 6p21.1-p21.2        |
| 201802_at   | 15 | SLC29A1  | NM_004955 | 6p21.1-p21.2        |
| 201250_s_at | 15 | SLC2A1   | NM_006516 | 1p35-p31.3          |
| 221024_s_at | 14 | SLC2A10  | NM_030777 | 20q13.1 /// 20q13.1 |
| 216236_s_at | 12 | SLC2A14  | AL110298  | 12p13.31            |
| 222088_s_at | 15 | SLC2A14  | AA778684  | 12p13.31            |
| 202497_x_at | 13 | SLC2A3   | AI631159  | 12p13.3             |
| 202498_s_at | 11 | SLC2A3   | BE550486  | 12p13.3             |
| 202499_s_at | 15 | SLC2A3   | NM_006931 | 12p13.3             |
| 218494_s_at | 15 | SLC2A4RG | BE898559  | 20q13.33            |
| 218985_at   | 10 | SLC2A8   | NM_014580 | 9q34.13             |
| 212907_at   | 13 | SLC30A1  | AI972416  | 1q32-q41            |

|             |    |          |           |                       |
|-------------|----|----------|-----------|-----------------------|
| 218989_x_at | 15 | SLC30A5  | NM_022902 | 5q12.1                |
| 202614_at   | 15 | SLC30A9  | NM_006345 | 4p13-p12              |
| 203971_at   | 11 | SLC31A1  | NM_001859 | 9q31-q32 /// 9q31-q32 |
| 204204_at   | 12 | SLC31A2  | NM_001860 | 9q31-q32              |
| 203164_at   | 15 | SLC33A1  | BE464756  | 3q25.31               |
| 203306_s_at | 15 | SLC35A1  | NM_006416 | 6q15                  |
| 207439_s_at | 14 | SLC35A2  | NM_005660 | Xp11.23-p11.22        |
| 207440_at   | 10 | SLC35A2  | NM_005660 | Xp11.23-p11.22        |
| 206770_s_at | 10 | SLC35A3  | NM_012243 | 1p21                  |
| 218519_at   | 15 | SLC35A5  | NM_017945 | 3q13.2                |
| 202433_at   | 15 | SLC35B1  | NM_005827 | 17q21.33              |
| 209711_at   | 15 | SLC35D1  | N80922    | 1p32-p31              |
| 209712_at   | 13 | SLC35D1  | AI769637  | 1p32-p31              |
| 220796_x_at | 15 | SLC35E1  | NM_024881 | 19p13.12              |
| 79005_at    | 13 | SLC35E1  | AA504646  | 19p13.12              |
| 217122_s_at | 15 | SLC35E2  | AL031282  | ---                   |
| 218988_at   | 14 | SLC35E3  | NM_018656 | 12q15                 |
| 218826_at   | 14 | SLC35F2  | NM_017515 | 11q23.1               |
| 218237_s_at | 15 | SLC38A1  | NM_030674 | 12q13.11              |
| 218041_x_at | 15 | SLC38A2  | NM_018573 | 12q                   |
| 220924_s_at | 15 | SLC38A2  | NM_018976 | 12q                   |
| 214830_at   | 10 | SLC38A6  | AI537540  | 14q23.1               |
| 217778_at   | 11 | SLC39A1  | NM_014437 | 1q21                  |
| 212110_at   | 15 | SLC39A14 | D31887    | 8p21.2                |
| 202088_at   | 15 | SLC39A6  | AI635449  | 18q12.2               |
| 202089_s_at | 15 | SLC39A6  | NM_012319 | 18q12.2               |
| 202667_s_at | 14 | SLC39A7  | NM_006979 | 6p21.3                |
| 219869_s_at | 11 | SLC39A8  | AW139759  | 4q22-q24              |
| 217859_s_at | 13 | SLC39A9  | NM_018375 | 14q24.1               |
| 205799_s_at | 11 | SLC3A1   | NM_000341 | 2p16.3                |
| 212216_at   | 15 | SLC3A1   | AW000954  | 2p22.1                |
| 212217_at   | 15 | SLC3A1   | AU154782  | 2p16.3                |
| 200924_s_at | 13 | SLC3A2   | NM_002394 | 11q13                 |
| 219175_s_at | 15 | SLC41A3  | NM_017836 | 3q21.2                |
| 204394_at   | 14 | SLC43A1  | NM_003627 | 11p11.2-p11.1         |
| 213113_s_at | 15 | SLC43A3  | AI630178  | 11q11                 |
| 205592_at   | 14 | SLC4A1   | NM_000342 | 17q21-q22             |
| 221770_at   | 11 | SLC4A10  | BE964473  | ---                   |
| 218682_s_at | 10 | SLC4A1AP | NM_018158 | 2p23.3                |
| 202111_at   | 15 | SLC4A2   | NM_003040 | 7q35-q36              |
| 205918_at   | 15 | SLC4A3   | NM_005070 | 2q36                  |
| 203908_at   | 15 | SLC4A4   | NM_003759 | 4q21                  |
| 207604_s_at | 13 | SLC4A7   | NM_003615 | 3p22                  |
| 209884_s_at | 15 | SLC4A7   | AF047033  | 3p22                  |
| 206628_at   | 15 | SLC5A1   | NM_000343 | 22q13.1               |
| 202219_at   | 15 | SLC6A8   | NM_005629 | Xq28                  |
| 213843_x_at | 15 | SLC6A8   | AW276522  | Xq28                  |
| 212295_s_at | 15 | SLC7A1   | AA148507  | 13q12-q14             |
| 203578_s_at | 11 | SLC7A6   | NM_003983 | 16q22.1               |

|             |    |               |           |              |
|-------------|----|---------------|-----------|--------------|
| 203580_s_at | 13 | SLC7A6        | NM_003983 | 16q22.1      |
| 204588_s_at | 10 | SLC7A7        | NM_003982 | 14q11.2      |
| 216092_s_at | 12 | SLC7A8        | AL365347  | 14q11.2      |
| 207053_at   | 10 | SLC8A1        | NM_021097 | 2p23-p22     |
| 210804_x_at | 10 | SLC8A1        | AF128524  | 2p23-p22     |
| 208039_at   | 12 | SLC9A2        | NM_003048 | 2q11.2       |
| 203909_at   | 15 | SLC9A6        | NM_006359 | Xq26.3       |
| 204368_at   | 15 | SLCO2A1       | NM_005630 | 3q21         |
| 203473_at   | 13 | SLCO2B1       | NM_007256 | 11q13        |
| 210542_s_at | 15 | SLCO3A1       | BC000585  | 15q26        |
| 219229_at   | 12 | SLCO3A1       | NM_013272 | 15q26        |
| 209897_s_at | 15 | SLIL3; Slit-2 | AF055585  | 4p15.2       |
| 206874_s_at | 15 | SLK           | AL138761  | 10q25.1      |
| 206875_s_at | 15 | SLK           | NM_014720 | 10q25.1      |
| 210105_s_at | 15 | SLK           | M14333    | 6q21         |
| 216033_s_at | 15 | SLK           | S74774    | 6q21         |
| 205374_at   | 14 | SLN           | NM_003063 | 11q22-q23    |
| 209948_at   | 13 | SLO-BETA      | U61536    | 5q34         |
| 33736_at    | 15 | SLP-1         | Y16522    | 15q24-q25    |
| 217828_at   | 15 | SLTM          | NM_024755 | 15q21.3      |
| 214850_at   | 11 | SMA4          | X75940    | 5q13         |
| 203075_at   | 15 | SMAD2         | AW151617  | 18q21.1      |
| 203077_s_at | 15 | SMAD2         | NM_005901 | 18q21.1      |
| 218284_at   | 15 | SMAD3         | NM_015400 | 15q22.31     |
| 202527_s_at | 15 | SMAD4         | NM_005359 | 18q21.1      |
| 207069_s_at | 15 | SMAD6         | NM_005585 | 15q21-q22    |
| 204790_at   | 15 | SMAD7         | NM_005904 | 18q21.1      |
| 200084_at   | 15 | SMAP          | BE748698  | 11p15.2      |
| 201784_s_at | 15 | SMAP          | NM_014267 | 11p15.2      |
| 218137_s_at | 15 | SMAP1         | AU153608  | 6q12-q13     |
| 221509_at   | 15 | smap-3        | AB014731  | 12q24.31     |
| 203874_s_at | 15 | SMARCA1       | M88163    | Xq25         |
| 203875_at   | 15 | SMARCA1       | NM_003069 | Xq25         |
| 206542_s_at | 15 | SMARCA2       | AV725365  | 9p22.3       |
| 206544_x_at | 15 | SMARCA2       | NM_003070 | 9p22.3       |
| 212257_s_at | 14 | SMARCA2       | AW131754  | 9p22.3       |
| 217707_x_at | 15 | SMARCA2       | AI535683  | ---          |
| 202983_at   | 15 | SMARCA3       | AI760760  | 3q25.1-q26.1 |
| 213720_s_at | 15 | SMARCA4       | AI831675  | 19p13.2      |
| 202303_x_at | 15 | SMARCA5       | NM_003601 | 4q31.1-q31.2 |
| 213251_at   | 15 | SMARCA5       | AV712064  | 4q31.1-q31.2 |
| 213859_x_at | 13 | SMARCA5       | AI652586  | 4q31.1-q31.2 |
| 201073_s_at | 15 | SMARCC1       | AL040633  | 3p23-p21     |
| 201074_at   | 15 | SMARCC1       | AA593983  | 3p23-p21     |
| 201075_s_at | 15 | SMARCC1       | NM_003074 | 3p23-p21     |
| 201320_at   | 15 | SMARCC2       | BF663402  | 12q13.13     |
| 201321_s_at | 15 | SMARCC2       | NM_003075 | 12q13-q14    |
| 203183_s_at | 15 | SMARCD1       | NM_003076 | 12q13-q14    |
| 209518_at   | 10 | SMARCD1       | AI869240  | 12q13-q14    |
| 204099_at   | 15 | SMARCD3       | NM_003078 | 7q35-q36     |

|             |    |         |           |                 |
|-------------|----|---------|-----------|-----------------|
| 211988_at   | 15 | SMARCE1 | BG289800  | 17q21.2         |
| 211989_at   | 15 | SMARCE1 | NM_003079 | 17q21.2         |
| 217758_s_at | 15 | SMBP    | BG104571  | 10q24.2         |
| 31861_at    | 13 | SMBP2   | L14754    | 11q13.2-q13.4   |
| 201589_at   | 15 | SMC1L1  | D80000    | Xp11.22-p11.21  |
| 204240_s_at | 11 | SMC2L1  | NM_006444 | 9q31.2          |
| 213253_at   | 13 | SMC2L1  | AU154486  | 9q31.2          |
| 201663_s_at | 15 | SMC4L1  | NM_005496 | 3q26.1          |
| 201664_at   | 15 | SMC4L1  | AL136877  | 3q26.1          |
| 212926_at   | 14 | SMC5L1  | AW183677  | 9q21.2          |
| 212927_at   | 14 | SMC5L1  | AW183677  | 9q21.2          |
| 218781_at   | 15 | SMC6L1  | NM_024624 | 2p24.3          |
| 202383_at   | 14 | SMCX    | NM_004187 | Xp11.22-p11.21  |
| 206700_s_at | 10 | SMCY    | NM_004653 | Yq11            |
| 203852_s_at | 15 | SMN1    | NM_000344 | 5q13            |
| 200071_at   | 15 | SMNDC1  | BF224259  | 10q23           |
| 210357_s_at | 15 | SMOX    | BC000669  | 20p13           |
| 213624_at   | 15 | SMPDL3A | AA873600  | 6q22.32         |
| 219772_s_at | 15 | SMPX    | NM_014332 | Xp22.1          |
| 202043_s_at | 15 | SMS     | NM_004595 | Xp22.1          |
| 207390_s_at | 15 | SMTN    | NM_006932 | 22q12.2         |
| 209427_at   | 15 | SMTN    | AF064238  | 22q12.2         |
| 218685_s_at | 12 | SMUG1   | NM_014311 | 12q13.11-q13.3  |
| 212666_at   | 15 | SMURF1  | AB046845  | 7q21.1-q31.1    |
| 205596_s_at | 15 | SMURF2  | AY014180  | 17q22-q23       |
| 212921_at   | 12 | SMYD2   | AF070592  | 1q32.3          |
| 212922_s_at | 15 | SMYD2   | AI809870  | 1q32.3          |
| 218788_s_at | 15 | SMYD3   | NM_022743 | 1q44            |
| 44673_at    | 12 | SN      | N53555    | 20p13           |
| 213139_at   | 15 | SNAI2   | AI572079  | 8q11            |
| 209130_at   | 15 | SNAP23  | BC003686  | 15q14           |
| 214544_s_at | 14 | SNAP23  | NM_003825 | 15q14           |
| 218098_at   | 15 | SNAP23P | AL121903  | 20q13.13        |
| 218327_s_at | 15 | SNAP29  | NM_004782 | 22q11.21        |
| 210465_s_at | 14 | SNAP50  | U71300    | 9p22.2          |
| 205443_at   | 15 | SNAPC1  | NM_003082 | 14q22           |
| 204001_at   | 15 | SNAPC3  | NM_003084 | 9p22.2          |
| 213203_at   | 15 | SNAPC5  | AI633709  | 15q22.2         |
| 204466_s_at | 15 | SNCA    | NM_000345 | 4q21            |
| 204467_s_at | 15 | SNCA    | NM_000345 | 4q21            |
| 207827_x_at | 15 | SNCA    | NM_007308 | 4q21            |
| 201622_at   | 15 | SND1    | NM_014390 | 7q31.3          |
| 218391_at   | 15 | SNF8    | NM_007241 | 17q21.33        |
| 218032_at   | 15 | SNN     | AF070673  | 16p13 /// 16p13 |
| 201221_s_at | 15 | SNRP70  | NM_003089 | 19q13.3         |
| 201770_at   | 15 | SNRPA   | NM_004596 | 19q13.1         |
| 206055_s_at | 15 | SNRPA1  | NM_003090 | 15q26.3         |
| 215722_s_at | 15 | SNRPA1  | AJ130971  | 15q26.3         |
| 216977_x_at | 14 | SNRPA1  | AJ130972  | 15q26.3         |
| 208821_at   | 15 | SNRPB   | J04564    | 20p13           |

|             |    |           |           |                   |
|-------------|----|-----------|-----------|-------------------|
| 213175_s_at | 15 | SNRPB     | AL049650  | 20p13             |
| 202505_at   | 15 | SNRPB2    | NM_003092 | 20p12.2-p11.22    |
| 201342_at   | 15 | SNRPC     | NM_003093 | 6p21.31           |
| 202690_s_at | 15 | SNRPD1    | BC001721  | 18q11.2           |
| 202691_at   | 14 | SNRPD1    | NM_006938 | 18q11.2           |
| 200826_at   | 15 | SNRPD2    | NM_004597 | 19q13.2           |
| 202567_at   | 15 | SNRPD3    | NM_004175 | 22q11.23          |
| 203316_s_at | 15 | SNRPE     | NM_003094 | 1q32              |
| 215450_at   | 14 | SNRPE     | W87901    | 1q32              |
| 202886_s_at | 12 | SNRPEP1   | M65254    | 11q23.2           |
| 203832_at   | 15 | SNRPF     | NM_003095 | 12q23.1           |
| 205644_s_at | 15 | SNRPG     | NM_003096 | 2p13.3            |
| 201522_x_at | 15 | SNRPN     | NM_003097 | 15q12             |
| 213447_at   | 15 | SNRPN     | AI672541  | ---               |
| 203516_at   | 15 | SNTA1     | NM_003098 | 20q11.2           |
| 205315_s_at | 10 | SNTB2     | NM_006750 | 16q22-q23         |
| 206042_x_at | 15 | SNURF     | NM_005678 | 15q12             |
| 201575_at   | 15 | SNW1      | NM_012245 | 14q24.3           |
| 210648_x_at | 15 | SNX 3A    | AB047360  | 6q21              |
| 209860_s_at | 15 | SNX; ANX7 | J04543    | 10q21.1-q21.2     |
| 201716_at   | 15 | SNX1      | NM_003099 | 15q22.1           |
| 213364_s_at | 14 | SNX1      | AI052536  | 15q22.1           |
| 214531_s_at | 12 | SNX1      | AF065484  | 15q22.1           |
| 53912_at    | 15 | SNX11     | AI668643  | 17q21.32          |
| 213292_s_at | 15 | SNX13     | AA908770  | 7p21.1            |
| 205482_x_at | 14 | SNX15     | NM_013306 | 11q12             |
| 219793_at   | 13 | SNX16     | NM_022133 | 8q21.13           |
| 202359_s_at | 10 | SNX19     | NM_014758 | 11q25             |
| 202113_s_at | 15 | SNX2      | AF043453  | 5q23              |
| 202114_at   | 15 | SNX2      | NM_003100 | 5q23              |
| 218705_s_at | 13 | SNX24     | NM_014035 | 5q23.2            |
| 221006_s_at | 11 | SNX27     | NM_030918 | 1q21.3 /// 1q21.3 |
| 200067_x_at | 15 | SNX3      | AL078596  | 6q21              |
| 208781_x_at | 15 | SNX3      | AL078596  | 6q21              |
| 213545_x_at | 15 | SNX3      | BE962615  | 6q21              |
| 205329_s_at | 15 | SNX4      | AF130078  | 3q21.2            |
| 212652_s_at | 15 | SNX4      | AA524345  | 3q21.2            |
| 217792_at   | 15 | SNX5      | NM_014426 | 20p11             |
| 217789_at   | 14 | SNX6      | NM_021249 | 14q13.1           |
| 205573_s_at | 15 | SNX7      | NM_015976 | 1p21.3            |
| 203372_s_at | 15 | SOCS2     | NM_003877 | 12q               |
| 203373_at   | 15 | SOCS2     | NM_003877 | 12q               |
| 208127_s_at | 15 | SOCS5     | NM_014011 | 2p21              |
| 209647_s_at | 15 | SOCS5     | AW664421  | 2p21              |
| 209648_x_at | 15 | SOCS5     | AL136896  | 2p21              |
| 206020_at   | 11 | SOCS6     | NM_016387 | 18q22.2           |
| 214462_at   | 11 | SOCS6     | NM_004232 | 18q22.2           |
| 200642_at   | 15 | SOD1      | NM_000454 | 21q22.1           |
| 215223_s_at | 15 | SOD2      | W46388    | 6q25.3            |
| 204275_at   | 12 | SOLH      | AI796687  | 16p13.3           |



|             |    |          |           |                 |
|-------------|----|----------|-----------|-----------------|
| 201086_x_at | 15 | SON      | NM_003103 | 21q22.1-q22.2   |
| 213538_at   | 15 | SON      | AI936458  | 21q22.1-q22.2   |
| 207436_x_at | 15 | SORBS1   | NM_014896 | 10q23.3-q24.1   |
| 218087_s_at | 15 | SORBS1   | N21458    | 10q23.3-q24.1   |
| 204288_s_at | 15 | SORBS2   | NM_021069 | 4q35.1          |
| 220858_at   | 12 | SORBS2   | NM_014133 | 4q35.1          |
| 201563_at   | 15 | SORD1    | L29008    | 15q15.3         |
| 212807_s_at | 15 | SORT1    | BF447105  | 1p21.3-p13.1    |
| 212780_at   | 15 | SOS1     | AA700167  | 2p22-p21        |
| 211665_s_at | 13 | SOS2     | L20686    | 14q21 /// 14q21 |
| 212870_at   | 15 | SOS2     | AI628605  | 14q22.1         |
| 213456_at   | 11 | SOSTDC1  | AI927000  | 7p21.2          |
| 204913_s_at | 12 | SOX11    | AI360875  | 2p25            |
| 204914_s_at | 13 | sox11    | AB028641  | 2p25            |
| 204915_s_at | 14 | sox11    | AB028641  | 2p25            |
| 204432_at   | 13 | SOX12    | NM_006943 | 20p13           |
| 219993_at   | 15 | SOX17    | NM_022454 | 8q11.23         |
| 219568_x_at | 15 | SOX18    | NM_018419 | 20q13.33        |
| 201416_at   | 15 | SOX4     | NM_003107 | 6p22.3          |
| 201417_at   | 15 | SOX4     | AL136179  | 6p22.3          |
| 201418_s_at | 10 | SOX4     | NM_003107 | 6p22.3          |
| 202935_s_at | 13 | SOX9     | AI382146  | 17q24.3-q25.1   |
| 202936_s_at | 13 | SOX9     | NM_000346 | 17q24.3-q25.1   |
| 210195_s_at | 12 | SP1      | M34715    | 19q13.2         |
| 202863_at   | 15 | SP100    | NM_003113 | 2q37.1          |
| 202864_s_at | 15 | SP100    | NM_003113 | 2q37.1          |
| 208012_x_at | 15 | SP110    | NM_004509 | 2q37.1          |
| 209761_s_at | 15 | SP110    | AA969194  | 2q37.1          |
| 209762_x_at | 15 | SP110    | AA969194  | 2q37.1          |
| 217877_s_at | 15 | SP192    | AA741071  | 1p34.1          |
| 204367_at   | 13 | SP2      | D28588    | 17q21.32        |
| 213168_at   | 15 | SP3      | AU145005  | 2q31            |
| 205406_s_at | 11 | SPA17    | NM_017425 | 11q24.2         |
| 219109_at   | 15 | SPAG16   | NM_024532 | 2q35            |
| 219888_at   | 11 | SPAG4    | NM_003116 | 20q11.21        |
| 203145_at   | 13 | SPAG5    | NM_006461 | 17q11.2         |
| 200053_at   | 15 | SPAG7    | NM_004890 | 17p13.2         |
| 212468_at   | 14 | SPAG9    | AK023512  | 17q21.33        |
| 212470_at   | 15 | SPAG9    | AB011088  | 17q21.33        |
| 200665_s_at | 15 | SPARC    | NM_003118 | 5q31.3-q32      |
| 212667_at   | 15 | SPARC    | AL575922  | 5q31.3-q32      |
| 200795_at   | 15 | SPARCL1  | NM_004684 | 4q22.1          |
| 212526_at   | 15 | SPARTIN  | AK002207  | 13q13.2         |
| 207724_s_at | 13 | SPAST    | NM_014946 | 2p24-p21        |
| 218164_at   | 14 | SPATA20  | NM_022827 | 17q21.33        |
| 218933_at   | 12 | SPATA5L1 | NM_024063 | 15q15.1         |
| 222163_s_at | 13 | SPATA5L1 | BE890973  | 15q15.1         |
| 219583_s_at | 14 | SPATA7   | NM_018418 | 14q31.3         |
| 218324_s_at | 15 | SPATS2   | NM_023071 | 12q13.12        |
| 217927_at   | 15 | SPCS1    | NM_014041 | 3p21.31         |

|             |    |                                          |           |                                   |
|-------------|----|------------------------------------------|-----------|-----------------------------------|
| 201239_s_at | 15 | SPCS2                                    | NM_014752 | 11q13.3                           |
| 201240_s_at | 15 | SPCS2                                    | NM_014752 | 11q13.3                           |
| 218817_at   | 15 | SPCS3                                    | NM_021928 | 4q34.2                            |
| 201996_s_at | 11 | SPEN                                     | AL524033  | 1p36.33-p36.11                    |
| 201997_s_at | 15 | SPEN                                     | NM_015001 | 1p36.33-p36.11                    |
| 210592_s_at | 15 | spermidine/spermine N1-acetyltransferase | M55580    | Xp22.1                            |
| 202441_at   | 15 | SPFH1                                    | AL568449  | 10q21-q22                         |
| 216678_at   | 12 | SPG                                      | AK000773  | 3q21                              |
| 215383_x_at | 15 | SPG21                                    | AL137312  | 15q21-q22                         |
| 217827_s_at | 15 | SPG21                                    | NM_016630 | 15q21-q22                         |
| 209748_at   | 11 | SPG4                                     | AB029006  | 2p24-p21                          |
| 202104_s_at | 13 | SPG7                                     | NM_003119 | 16q24.3                           |
| 214494_s_at | 15 | SPG7                                     | NM_005200 | 16q24.3 /// 16q24.3               |
| 206272_at   | 15 | SPHAR                                    | NM_006542 | 1q42.11-q42.3                     |
| 219257_s_at | 11 | SPHK1                                    | NM_021972 | 17q25.2                           |
| 217813_s_at | 14 | SPIN                                     | NM_006717 | 9q22.1-q22.3                      |
| 211704_s_at | 11 | SPIN2                                    | AF356353  | Xp11.23-p11.21 /// Xp11.23-p11.21 |
| 32402_s_at  | 15 | SPK; SYM                                 | Y10931    | 19q13.3                           |
| 202524_s_at | 12 | SPOCK2                                   | AI952009  | 10pter-q25.3                      |
| 209436_at   | 15 | SPON1                                    | AB018305  | 11p15.2                           |
| 213994_s_at | 13 | SPON1                                    | AI885290  | 11p15.2                           |
| 218638_s_at | 15 | SPON2                                    | NM_012445 | 4p16.3                            |
| 204640_s_at | 15 | SPOP                                     | NM_003563 | 17q21.33                          |
| 208927_at   | 15 | SPOP                                     | BF673888  | 17q21.33                          |
| 203458_at   | 11 | SPR                                      | AI951454  | 2p14-p12                          |
| 212458_at   | 15 | SPRED2                                   | H97931    | 2p14                              |
| 212558_at   | 15 | SPRY1                                    | BF508662  | 20q12                             |
| 204011_at   | 15 | SPRY2                                    | NM_005842 | 13q22.2                           |
| 221489_s_at | 15 | SPRY4                                    | AF227517  | 5q31.3                            |
| 206937_at   | 10 | SPTA1                                    | NM_003126 | 1q21                              |
| 215235_at   | 15 | SPTAN1                                   | AL110273  | 9q33-q34                          |
| 214145_s_at | 10 | SPTB                                     | BG223341  | 14q23.3                           |
| 200671_s_at | 15 | SPTBN1                                   | N92501    | 2p21                              |
| 200672_x_at | 15 | SPTBN1                                   | NM_003128 | 2p21                              |
| 207283_at   | 13 | SPTBN1                                   | NM_020217 | 2p21                              |
| 212071_s_at | 15 | SPTBN1                                   | BE968833  | 2p21                              |
| 215918_s_at | 15 | SPTBN1                                   | AA131826  | 2p21                              |
| 202277_at   | 15 | SPTLC1                                   | AL568804  | 9q22.2                            |
| 202278_s_at | 10 | SPTLC1                                   | NM_006415 | 9q22.2                            |
| 203127_s_at | 13 | SPTLC2                                   | BC005123  | 14q24.3-q31                       |
| 217995_at   | 13 | SQRDL                                    | NM_021199 | 15q15                             |
| 201471_s_at | 15 | SQSTM1                                   | NM_003900 | 5q35                              |
| 212058_at   | 15 | SR140                                    | AI184562  | 3q23                              |
| 212060_at   | 14 | SR140                                    | AU152088  | 3q23                              |
| 212061_at   | 13 | SR140                                    | AB002330  | 3q23                              |
| 209363_s_at | 15 | SRB7                                     | U46837    | 12p12.1                           |
| 204675_at   | 14 | SRD5A1                                   | NM_001047 | 5p15                              |
| 201247_at   | 15 | SREBF2                                   | BE513151  | 22q13                             |

|             |    |        |           |              |
|-------------|----|--------|-----------|--------------|
| 201248_s_at | 15 | SREBF2 | NM_004599 | 22q13        |
| 202401_s_at | 15 | SRF    | NM_003131 | 6p21.1       |
| 208920_at   | 15 | SRI    | AV752215  | 7q21.1       |
| 208921_s_at | 15 | SRI    | L12387    | 7q21.1       |
| 201516_at   | 14 | SRM    | NM_003132 | 1p36-p22     |
| 200007_at   | 15 | SRP14  | NM_003134 | 15q22        |
| 205335_s_at | 15 | SRP19  | NM_003135 | 5q21-q22     |
| 213152_s_at | 13 | SRP46  | AI343248  | ---          |
| 214789_x_at | 15 | SRP46  | AA524274  | 11q22        |
| 203605_at   | 15 | SRP54  | NM_003136 | 14q13.2      |
| 208800_at   | 14 | SRP72  | AV702627  | 4q11         |
| 208801_at   | 15 | SRP72  | AV702627  | 4q11         |
| 208802_at   | 14 | SRP72  | AI493872  | 4q11         |
| 208803_s_at | 15 | SRP72  | AV702627  | 4q11         |
| 201273_s_at | 15 | SRP9   | NM_003133 | 1q42.13      |
| 202199_s_at | 15 | SRPK1  | AW082913  | 6p21.3-p21.2 |
| 202200_s_at | 15 | SRPK1  | NM_003137 | 6p21.3-p21.2 |
| 203181_x_at | 14 | SRPK2  | AW149364  | 7q22-q31.1   |
| 203182_s_at | 15 | SRPK2  | NM_003138 | 7q22-q31.1   |
| 214931_s_at | 15 | SRPK2  | AC005070  | 7q22-q31.1   |
| 200918_s_at | 15 | SRPR   | NM_003139 | 11q24.3      |
| 218140_x_at | 15 | SRPRB  | NM_021203 | 3q22.1       |
| 204955_at   | 15 | SRPX   | NM_006307 | Xp21.1       |
| 205499_at   | 12 | SRPX2  | NM_014467 | Xq21.33-q23  |
| 219204_s_at | 12 | SRR    | NM_021947 | 17p13        |
| 219205_at   | 14 | SRR    | NM_021947 | 17p13        |
| 201225_s_at | 15 | SRRM1  | NM_005839 | 1p36.11      |
| 207435_s_at | 15 | SRRM2  | NM_016333 | 16p13.3      |
| 208610_s_at | 15 | SRRM2  | AI655799  | 16p13.3      |
| 216833_x_at | 13 | SS     | U05255    | 4q31.1       |
| 202816_s_at | 15 | SS18   | AW292882  | 18q11.2      |
| 202817_s_at | 14 | SS18   | NM_005637 | 18q11.2      |
| 213140_s_at | 15 | SS18L1 | AB014593  | 20q13.3      |
| 218283_at   | 15 | SS18L2 | NM_016305 | 3p21         |
| 210438_x_at | 15 | SSA2   | M25077    | 1q31         |
| 212839_s_at | 12 | SSA2   | AK024044  | 1q31         |
| 212852_s_at | 15 | SSA2   | AL538601  | 1q31         |
| 213027_at   | 15 | SSA2   | AU146655  | 1q31         |
| 201138_s_at | 15 | SSB    | NM_003142 | 2q31.1       |
| 201139_s_at | 15 | SSB    | NM_003142 | 2q31.1       |
| 46256_at    | 15 | SSB3   | AA522670  | ---          |
| 202591_s_at | 15 | SSBP1  | NM_003143 | 7q34         |
| 214060_at   | 14 | SSBP1  | BE220360  | 7q34         |
| 203787_at   | 15 | SSBP2  | NM_012446 | 5q14.1       |
| 217991_x_at | 14 | SSBP3  | NM_018070 | 1p32.3       |
| 202506_at   | 15 | SSFA2  | NM_006751 | 2q32.1       |
| 221752_at   | 15 | SSH1   | AI651213  | 12q24.12     |
| 221753_at   | 15 | SSH1   | AI651213  | 12q24.12     |
| 210378_s_at | 15 | SSNA1  | BC004118  | 9q34.3       |
| 202318_s_at | 15 | SSP1   | AF306508  | 6q13-q14.3   |

|             |    |               |           |              |
|-------------|----|---------------|-----------|--------------|
| 214790_at   | 14 | SSP1          | AK001406  | 6q13-q14.3   |
| 204963_at   | 15 | SSPN          | AL136756  | 12p11.2      |
| 204964_s_at | 13 | SSPN          | AL136756  | 12p11.2      |
| 200889_s_at | 15 | SSR1          | NM_003144 | 6p24.3       |
| 200890_s_at | 14 | SSR1          | NM_003144 | 6p24.3       |
| 200891_s_at | 15 | SSR1          | NM_003144 | 6p24.3       |
| 200652_at   | 15 | SSR2          | NM_003145 | 1q21-q23     |
| 217790_s_at | 12 | SSR3          | NM_007107 | 3q25.31      |
| 201004_at   | 15 | SSR4          | NM_006280 | Xq28         |
| 200956_s_at | 15 | SSRP1         | BE795648  | 11q12        |
| 200957_s_at | 15 | SSRP1         | NM_003146 | 11q12        |
| 203015_s_at | 15 | SSX2IP        | AW136988  | ---          |
| 203016_s_at | 12 | SSX2IP        | NM_014021 | ---          |
| 203017_s_at | 12 | SSX2IP        | R52678    | ---          |
| 207040_s_at | 15 | ST13          | NM_003932 | 22q13.2      |
| 208666_s_at | 15 | ST13          | BE866412  | 22q13.2      |
| 208667_s_at | 15 | ST13          | U17714    | 22q13.2      |
| 210942_s_at | 15 | ST3Gal VI     | AB022918  | 3q12.2       |
| 203759_at   | 15 | ST3GAL4       | NM_006278 | 11q23-q24    |
| 203217_s_at | 15 | ST3GAL5       | NM_003896 | 2p11.2       |
| 202440_s_at | 14 | ST5           | NM_005418 | 11p15        |
| 220937_s_at | 15 | ST6GALNAC4    | NM_014403 | 9q34         |
| 207524_at   | 15 | ST7           | NM_021908 | 7q31.1-q31.3 |
| 207871_s_at | 15 | ST7           | NM_018412 | 7q31.1-q31.3 |
| 38487_at    | 15 | STAB1         | D87433    | 3p21.31      |
| 201836_s_at | 15 | STAF65(gamma) | AU154740  | 2pter-p25.1  |
| 202294_at   | 15 | STAG1         | NM_005862 | 3q21-q22     |
| 207983_s_at | 15 | STAG2         | NM_006603 | Xq25         |
| 209022_at   | 15 | STAG2         | AK026678  | Xq25         |
| 209023_s_at | 15 | STAG2         | BC001765  | Xq25         |
| 203544_s_at | 15 | STAM          | NM_003473 | 10p14-p13    |
| 215044_s_at | 14 | STAM2         | AI571996  | 2q24.1       |
| 202811_at   | 15 | STAMPB        | NM_006463 | 2p13.1       |
| 213103_at   | 14 | STARD13       | AA128023  | 13q12-q13    |
| 202991_at   | 10 | STARD3        | NM_006804 | 17q11-q12    |
| 200028_s_at | 15 | STARD7        | NM_020151 | 2q11.2       |
| 206868_at   | 13 | STARD8        | NM_014725 | Xq13.1       |
| 200887_s_at | 15 | STAT1         | NM_007315 | 2q32.2       |
| 205170_at   | 13 | STAT2         | NM_005419 | 12q13.13     |
| 208991_at   | 15 | STAT3         | BC000627  | 17q21        |
| 206118_at   | 15 | STAT4         | NM_003151 | 2q32.2-q32.3 |
| 205026_at   | 13 | STAT5B        | NM_012448 | 17q11.2      |
| 212549_at   | 15 | STAT5B        | BE645861  | 17q11.2      |
| 212550_at   | 12 | STAT5B        | AI149535  | 17q11.2      |
| 201331_s_at | 15 | STAT6B        | BC004973  | 12q13        |
| 208948_s_at | 15 | STAU          | BC000830  | 20q13.1      |
| 211505_s_at | 15 | STAU          | AL136601  | 20q13.1      |
| 207320_x_at | 15 | STAU1         | NM_004602 | 20q13.1      |
| 204226_at   | 15 | STAU2         | NM_014393 | 8q13-q21.1   |
| 213037_x_at | 15 | staufen       | AJ132258  | 20q13.1      |

|             |    |                  |           |                                    |
|-------------|----|------------------|-----------|------------------------------------|
| 204597_x_at | 11 | STC1             | NM_003155 | 8p21-p11.2                         |
| 203438_at   | 13 | STC2             | AI435828  | 5q35.2                             |
| 203439_s_at | 15 | STC2             | BC000658  | 5q35.2                             |
| 202557_at   | 15 | STCH             | AI718418  | 21q11.1                            |
| 202558_s_at | 14 | STCH             | NM_006948 | 21q11.1                            |
| 219934_s_at | 15 | STE              | U55764    | 4q13.1                             |
| 205339_at   | 13 | STIL             | NM_003035 | 1q32                               |
| 202764_at   | 12 | STIM1            | NM_003156 | 11p15.5                            |
| 213330_s_at | 13 | STIP1            | BE886580  | 11q13                              |
| 40420_at    | 15 | STK10            | AB015718  | 5q35.1                             |
| 202693_s_at | 14 | STK17A           | NM_004760 | 7p12-p14                           |
| 206216_at   | 11 | STK23            | NM_014370 | Xq28                               |
| 208854_s_at | 15 | STK24            | AA586774  | 13q31.2-q32.3                      |
| 201314_at   | 15 | STK25            | NM_006374 | 2q37.3                             |
| 204068_at   | 15 | STK3             | NM_006281 | 8q22.2                             |
| 208855_s_at | 15 | STK3             | AF083420  | 13q31.2-q32.3                      |
| 202951_at   | 15 | STK38            | BE048506  | 6p21                               |
| 212565_at   | 15 | STK38L           | BE302191  | 12p12.1                            |
| 212572_at   | 15 | STK38L           | AW779556  | 12p12.1                            |
| 202786_at   | 15 | STK39            | NM_013233 | 2q31.1                             |
| 204092_s_at | 13 | STK6             | NM_003600 | 20q13.2-q13.3                      |
| 208079_s_at | 15 | STK6             | NM_003158 | 20q13.2-q13.3 ///<br>20q13.2-q13.3 |
| 209607_x_at | 15 | STM              | U08032    | 16p12.1                            |
| 210580_x_at | 15 | STM              | L25275    | 16p11.2                            |
| 200783_s_at | 15 | STMN1            | NM_005563 | 1p36.1-p35                         |
| 217714_x_at | 15 | STMN1            | AV756729  | 1p36.1-p35                         |
| 203001_s_at | 11 | STMN2            | NM_007029 | 8q21.11-q21.12                     |
| 201060_x_at | 15 | STOM             | AI537887  | 9q34.1                             |
| 210825_s_at | 15 | STOM             | AF130103  | 9q34.1 /// 9q34.1                  |
| 201061_s_at | 15 | stomatin peptide | M81635    | 9q34.1                             |
| 215416_s_at | 15 | STOML2           | AC004472  | 9p13.1                             |
| 215299_x_at | 14 | STP1             | U37025    | ---                                |
| 211385_x_at | 14 | STP2             | U28169    | 16p12.1                            |
| 200870_at   | 15 | STRAP            | NM_007178 | 12p13.1                            |
| 204496_at   | 14 | STRN3            | NM_014574 | 14q13-q21                          |
| 217903_at   | 15 | STRN4            | NM_013403 | 19q13.2                            |
| 217934_x_at | 15 | STUB1            | NM_005861 | 16p13.3                            |
| 212625_at   | 15 | STX10            | NM_003765 | 19p13.13                           |
| 212111_at   | 15 | STX12            | AA628051  | 1p35-p34.1                         |
| 212112_s_at | 15 | STX12            | AI816243  | 1p35-p34.1                         |
| 218763_at   | 15 | STX18            | NM_016930 | 4p16.2                             |
| 209238_at   | 15 | STX3A            | BE966922  | 11q12.2                            |
| 203530_s_at | 15 | STX4A            | NM_004604 | 16p11.2                            |
| 203330_s_at | 13 | STX5A            | NM_003164 | 11q12.3                            |
| 212799_at   | 15 | STX6             | AI740832  | 1q25.1                             |
| 212800_at   | 10 | STX6             | AI740832  | 1q25.1                             |
| 203457_at   | 15 | STX7             | NM_003569 | 6q23.1                             |
| 212631_at   | 15 | STX7             | AI566082  | ---                                |
| 212632_at   | 15 | STX7             | N32035    | ---                                |

|             |    |              |           |               |
|-------------|----|--------------|-----------|---------------|
| 204690_at   | 15 | STX8         | NM_004853 | 17p12         |
| 202260_s_at | 15 | STXBP1       | NM_003165 | 9q34.1        |
| 203310_at   | 14 | STXBP3       | NM_007269 | 1p13.3        |
| 220994_s_at | 14 | STXBP6       | NM_014178 | 14q11.2       |
| 218321_x_at | 15 | STYXL1       | NM_016086 | 7q11.23       |
| 214512_s_at | 15 | SUB1         | NM_006713 | 5p13.3        |
| 202930_s_at | 15 | SUCLA2       | NM_003850 | 13q12.2-q13.3 |
| 217874_at   | 15 | SUCLG1       | NM_003849 | 2p11.2        |
| 212459_x_at | 15 | SUCLG2       | BF593940  | 3p14.3        |
| 215772_x_at | 15 | SUCLG2       | AV650470  | 3p14.3        |
| 221213_s_at | 15 | SUHW4        | NM_017661 | 15q21.2       |
| 211956_s_at | 15 | SUI1         | BF246436  | 17q21.31      |
| 212130_x_at | 15 | SUI1         | AL537707  | 17q21.31      |
| 212227_x_at | 15 | SUI1         | W67644    | 17q21.31      |
| 212344_at   | 13 | SULF1        | AW043713  | 8q13.2        |
| 212353_at   | 15 | SULF1        | AI479175  | 8q13.2        |
| 212354_at   | 15 | SULF1        | AI479175  | 8q13.2        |
| 203615_x_at | 15 | SULT1A1      | NM_001055 | 16p12.1       |
| 207122_x_at | 15 | SULT1A2      | NM_001054 | 16p12.1       |
| 205812_s_at | 15 | SULT1C2      | NM_006588 | 2q11.1-q11.2  |
| 211069_s_at | 15 | SUMO1        | BC006462  | 2q33 /// 2q33 |
| 213879_at   | 15 | SUMO2        | AV726646  | 17q25         |
| 213881_x_at | 15 | SUMO2        | AI971724  | 17q25         |
| 215452_x_at | 15 | SUMO2        | AL031133  | ---           |
| 200739_s_at | 15 | SUMO3        | BG338532  | 21q22.3       |
| 200740_s_at | 15 | SUMO3        | BG338532  | 21q22.3       |
| 217168_s_at | 15 | SUP          | AF217990  | 16q12.2-q13   |
| 217815_at   | 15 | SUPT16H      | NM_007192 | 14q11.2       |
| 206506_s_at | 15 | SUPT3H       | NM_003599 | 6p21.1-p21.3  |
| 211106_at   | 13 | SUPT3H       | AF064804  | 6p21.1-p21.3  |
| 201483_s_at | 15 | SUPT4H1      | BC002802  | 17q21-q23     |
| 201484_at   | 15 | SUPT4H1      | NM_003168 | 17q21-q23     |
| 201480_s_at | 15 | SUPT5H       | NM_003169 | 19q13         |
| 208420_x_at | 14 | SUPT6H       | NM_003170 | 17q11.2       |
| 208830_s_at | 13 | SUPT6H       | AI494567  | 17q11.2       |
| 208831_x_at | 10 | SUPT6H       | D79984    | 17q11.2       |
| 212894_at   | 13 | SUPV3L1      | NM_003171 | 10q22.1       |
| 209362_at   | 15 | SURB7        | AI688580  | 12p12.1       |
| 204295_at   | 15 | SURF1        | NM_003172 | 9q34.2        |
| 206593_s_at | 15 | SURF5        | NM_006752 | 9q34.2        |
| 218242_s_at | 15 | SUV420H1     | AA056099  | 11q13.2       |
| 212287_at   | 15 | SUZ12        | BF382924  | 17q11.2       |
| 216086_at   | 15 | SV2C         | AB028977  | 5q13.3        |
| 202565_s_at | 15 | SVIL         | NM_003174 | 10p11.2       |
| 202566_s_at | 13 | SVIL         | AF051851  | 10p11.2       |
| 209898_x_at | 15 | SWA          | U61167    | 2pter-p25.1   |
| 209306_s_at | 14 | SWAP70       | BC000616  | 11p15         |
| 209307_at   | 15 | SWAP70       | AB014540  | 11p15         |
| 215294_s_at | 15 | SWI2         | AK026426  | Xq25          |
| 201296_s_at | 15 | SWIP1; WSB-1 | AF106684  | 17q11.2       |

|             |    |                |           |                              |
|-------------|----|----------------|-----------|------------------------------|
| 202829_s_at | 15 | SYBL1          | NM_005638 | Xq28                         |
| 202553_s_at | 15 | SYF2           | NM_015484 | 1p36.13-p35.1                |
| 212730_at   | 15 | SYN; KIAA0353  | AK026420  | 15q26.3                      |
| 221499_s_at | 15 | SYN16          | AK026970  | 20q13.32                     |
| 221500_s_at | 15 | SYN16          | AK026970  | 20q13.32                     |
| 210247_at   | 11 | SYN2           | AW139618  | 3p25                         |
| 221276_s_at | 12 | SYNC1          | NM_030786 | 1p34.3-p33 ///<br>1p34.3-p33 |
| 209024_s_at | 13 | SYNCRIP        | AI472757  | 6q14-q15                     |
| 217832_at   | 15 | SYNCRIP        | AL520908  | 6q14-q15                     |
| 217833_at   | 15 | SYNCRIP        | AL520908  | 6q14-q15                     |
| 217834_s_at | 14 | SYNCRIP        | AL520908  | 6q14-q15                     |
| 202761_s_at | 15 | SYNE2          | NM_015180 | 14q23.2                      |
| 210613_s_at | 15 | SYNGR1         | BC000731  | 22q13.1                      |
| 201079_at   | 15 | SYNGR2         | NM_004710 | 17q25.3                      |
| 212990_at   | 15 | SYNJ1          | AB020717  | 21q22.2                      |
| 212828_at   | 13 | SYNJ2          | AA191573  | 6q25.3                       |
| 219156_at   | 15 | SYNJ2BP        | NM_018373 | 14q24.1                      |
| 202796_at   | 15 | SYNPO          | NM_007286 | 5q33.1                       |
| 219804_at   | 15 | SYNPO2L        | NM_024875 | 10q22.3                      |
| 201259_s_at | 15 | SYPL           | AI768845  | 7q22.2                       |
| 201260_s_at | 15 | SYPL1          | NM_006754 | 7q22.2                       |
| 203999_at   | 13 | SYT1           | AV731490  | 12cen-q21                    |
| 209197_at   | 15 | SYT11          | AA626780  | 1q21.2                       |
| 209198_s_at | 14 | SYT11          | BC004291  | 1q21.2                       |
| 56829_at    | 13 | T1             | H61826    | 8q24.3                       |
| 221898_at   | 11 | T1A-2          | AU154455  | 1p36                         |
| 200976_s_at | 15 | T6BP; TXBP151  | AF090891  | 7p15                         |
| 200977_s_at | 15 | T6BP; TXBP151  | AF090891  | 7p15                         |
| 200911_s_at | 15 | TACC1          | NM_006283 | 8p11                         |
| 202289_s_at | 15 | TACC2          | NM_006997 | 10q26                        |
| 218308_at   | 11 | TACC3          | NM_006342 | 4p16.3                       |
| 201839_s_at | 12 | TACSTD1        | NM_002354 | 2p21                         |
| 200055_at   | 15 | TAF10          | NM_006284 | 11p15.3                      |
| 202840_at   | 15 | TAF15          | NM_003487 | 17q11.1-q11.2                |
| 206613_s_at | 12 | TAF1A          | NM_005681 | 1q42                         |
| 203938_s_at | 10 | TAF1C          | NM_005679 | 16q24                        |
| 209523_at   | 15 | TAF2B          | AK001618  | 8q24.12                      |
| 209358_at   | 15 | TAF2I          | AF118094  | 6p21.31                      |
| 209463_s_at | 11 | TAF2J; TAFII20 | D50544    | 1p35.2                       |
| 213090_s_at | 14 | TAF4           | AI744029  | 20q13.33                     |
| 203572_s_at | 15 | TAF6           | NM_005641 | 7q22.1                       |
| 205955_at   | 11 | TAF6L          | NM_018336 | 11q12.3                      |
| 213209_at   | 12 | TAF6L          | BF058726  | 11q12.3                      |
| 201023_at   | 15 | TAF7           | NM_005642 | 5q31                         |
| 202168_at   | 15 | TAF9           | NM_003187 | 5q11.2-q13.1                 |
| 203893_at   | 15 | TAF9           | NM_016283 | 5q11.2-q13.1                 |
| 209430_at   | 15 | TAFII170       | AJ001017  | 10q22-q23                    |
| 205547_s_at | 15 | TAGLN          | NM_003186 | 11q23.2                      |
| 200916_at   | 15 | TAGLN2         | NM_003564 | 1q21-q25                     |

|             |    |                  |           |                     |
|-------------|----|------------------|-----------|---------------------|
| 210978_s_at | 14 | TAGLN2           | BC002616  | 1q21-q25            |
| 211537_x_at | 14 | TAK1             | AF218074  | 6q16.1-q16.3        |
| 211536_x_at | 14 | TAK1; TGF1a      | AB009358  | 6q16.1-q16.3        |
| 206283_s_at | 15 | TAL1             | NM_003189 | 1p32                |
| 201463_s_at | 15 | TALDO1           | NM_006755 | 11p15.5-p15.4       |
| 207616_s_at | 15 | TANK             | NM_004180 | 2q24-q31            |
| 220761_s_at | 15 | TAOK3            | NM_016281 | 12q                 |
| 221508_at   | 15 | TAOK3            | BC002756  | 12q                 |
| 210276_s_at | 15 | TARA             | AF281030  | 22q13.1             |
| 202813_at   | 15 | TARBP1           | NM_005646 | 1q42.3              |
| 203677_s_at | 13 | TARBP2           | NM_004178 | 12q12-q13           |
| 211666_x_at | 15 | TARBP-b          | L22453    | 22q13 /// 22q13     |
| 200020_at   | 15 | TARDBP           | NM_007375 | 1p36.22             |
| 221264_s_at | 14 | TARDBP           | NM_031214 | 1p36.22 /// 1p36.22 |
| 201263_at   | 15 | TARS             | NM_003191 | 5p13.2 /// 5p13.2   |
| 221847_at   | 15 | TAS2R14          | BF665706  | 12p13               |
| 219443_at   | 14 | TASP1            | NM_017714 | 20p12.1             |
| 203648_at   | 14 | TATDN2           | NM_014760 | 3p25.3              |
| 212833_at   | 15 | TB1              | M74089    | 5q22.2              |
| 212350_at   | 15 | TBC1D1           | AB029031  | 4p14                |
| 220947_s_at | 15 | TBC1D10B         | NM_015527 | 16p12.1             |
| 221858_at   | 15 | TBC1D12          | N34407    | 10q23.33            |
| 44696_at    | 15 | TBC1D13          | AA915989  | 9q34.13             |
| 218268_at   | 15 | TBC1D15          | NM_022771 | 12q15               |
| 218466_at   | 13 | TBC1D17          | NM_024682 | 19q13.33            |
| 209403_at   | 13 | TBC1D3           | AL136860  | 17q21.1             |
| 203386_at   | 15 | TBC1D4           | AI650848  | 13q21.33            |
| 203387_s_at | 15 | TBC1D4           | NM_014832 | 13q21.33            |
| 201814_at   | 14 | TBC1D5           | NM_014744 | 3p24.3              |
| 204526_s_at | 15 | TBC1D8           | NM_007063 | 2q12.1              |
| 203667_at   | 15 | TBCA             | NM_004607 | 5q14.1              |
| 216683_at   | 10 | TBCA             | AL353949  | ---                 |
| 202495_at   | 13 | TBCC             | NM_003192 | 6pter-p12.1         |
| 201759_at   | 13 | TBCD             | AW247323  | 17q25.3             |
| 211052_s_at | 14 | TBCD             | BC006364  | 17q25.3 /// 17q25.3 |
| 203714_s_at | 15 | TBCE             | NM_003193 | 1q42.3              |
| 203715_at   | 15 | TBCE             | NM_003193 | 1q42.3              |
| 218520_at   | 15 | TBK1             | NM_013254 | 13q14.2-q14.3       |
| 221428_s_at | 14 | TBL1XR1          | NM_030921 | 3q26.33 /// 3q26.33 |
| 212685_s_at | 15 | TBL2             | AI608789  | 7q11.23             |
| 203135_at   | 15 | TBP              | NM_003194 | 6q27                |
| 208398_s_at | 15 | TBPL1            | NM_004865 | 6q22.1-q22.3        |
| 205993_s_at | 10 | TBX2             | NM_005994 | 17q23               |
| 40560_at    | 15 | TBX2             | U28049    | 17q23               |
| 207155_at   | 11 | TBX5             | NM_000192 | 12q24.1             |
| 211886_s_at | 11 | TBX5             | U80987    | 12q24.1             |
| 207554_x_at | 12 | TBXA2R           | NM_001060 | 19p13.3             |
| 209681_at   | 15 | TC1              | AF153330  | 1q23.3              |
| 200750_s_at | 15 | TC4; Gsp1; ARA24 | AF054183  | 6p21                |
| 205766_at   | 15 | TCAP             | NM_003673 | 17q12               |



|             |    |        |           |                     |
|-------------|----|--------|-----------|---------------------|
| 203919_at   | 15 | TCEA2  | NM_003195 | 20q13.33            |
| 204045_at   | 15 | TCEAL1 | NM_004780 | Xq22.1              |
| 202371_at   | 15 | TCEAL4 | NM_024863 | Xq22.2              |
| 202823_at   | 15 | TCEB1  | N89607    | 8q13.3              |
| 202824_s_at | 15 | TCEB1  | NM_005648 | 8q13.3              |
| 200085_s_at | 15 | TCEB2  | NM_007108 | 16p12.3             |
| 202818_s_at | 14 | TCEB3  | AI344128  | 1p36.1              |
| 213604_at   | 14 | TCEB3  | AW451236  | 1p36.1              |
| 202396_at   | 15 | TCERG1 | NM_006706 | 5q31                |
| 208986_at   | 15 | TCF12  | AL559478  | 15q21               |
| 212931_at   | 13 | TCF20  | AB006630  | 22q13.3             |
| 215511_at   | 14 | TCF20  | U19345    | 22q13.3             |
| 204931_at   | 15 | TCF21  | NM_003206 | 6pter-qter          |
| 209152_s_at | 12 | TCF3   | M31523    | 19p13.3             |
| 209153_s_at | 15 | TCF3   | M31523    | 19p13.3             |
| 210776_x_at | 14 | TCF3   | M31222    | 19p13.3             |
| 213730_x_at | 14 | TCF3   | BE962186  | 19p13.3             |
| 213811_x_at | 15 | TCF3   | BG393795  | 19p13.3             |
| 203753_at   | 15 | TCF4   | NM_003199 | 18q21.1             |
| 212382_at   | 15 | TCF4   | BF433429  | 18q21.1             |
| 212385_at   | 13 | TCF4   | AU118026  | 18q21.1             |
| 212386_at   | 15 | TCF4   | BF592782  | 18q21.1             |
| 212387_at   | 15 | TCF4   | BG495771  | 18q21.1             |
| 213891_s_at | 15 | TCF4   | AI927067  | 18q21.1             |
| 205255_x_at | 15 | TCF7   | NM_003202 | 5q31.1              |
| 221016_s_at | 15 | TCF7L1 | NM_031283 | 2p11.2 /// 2p11.2   |
| 212761_at   | 13 | TCF7L2 | AI703074  | 10q25.3             |
| 212762_s_at | 15 | TCF7L2 | AI375916  | 10q25.3             |
| 216035_x_at | 12 | TCF7L2 | AV721430  | 10q25.3             |
| 216037_x_at | 15 | TCF7L2 | AA664011  | 10q25.3             |
| 216511_s_at | 15 | TCF7L2 | AJ270770  | ---                 |
| 208078_s_at | 15 | TCF8   | NM_030751 | 10p11.2 /// 10p11.2 |
| 212764_at   | 15 | TCF8   | AI373166  | 10p11.2             |
| 213708_s_at | 15 | TCFL4  | N40555    | 17q12-q21           |
| 204849_at   | 13 | TCFL5  | NM_006602 | 20q13.3-qter        |
| 202384_s_at | 12 | TCOF1  | AW167713  | 5q32-q33.1          |
| 208778_s_at | 15 | TCP1   | BC000665  | 6q25-q27            |
| 203054_s_at | 14 | TCTA   | NM_022171 | 3p21                |
| 208671_at   | 15 | TDE2   | AF164794  | 6q22.32             |
| 203742_s_at | 10 | TDG    | NM_003211 | 12q24.1             |
| 203743_s_at | 15 | TDG    | NM_003211 | 12q24.1             |
| 208089_s_at | 14 | TDRD3  | NM_030794 | 13q21.1 /// 13q21.1 |
| 214028_x_at | 13 | TDRD3  | AU156998  | 13q21.1             |
| 213361_at   | 13 | TDRD7  | AW129593  | 9q22.33             |
| 214600_at   | 13 | TEAD1  | AW771935  | 11p15.4             |
| 209454_s_at | 15 | TEF5   | AF142482  | 6p21.2              |
| 200803_s_at | 15 | TEGT   | NM_003217 | 12q12-q13           |
| 200804_at   | 15 | TEGT   | NM_003217 | 12q12-q13           |
| 206702_at   | 15 | TEK    | NM_000459 | 9p21                |
| 212494_at   | 15 | TENC1  | AB028998  | 12q13.13            |

|             |    |                  |           |               |
|-------------|----|------------------|-----------|---------------|
| 204053_x_at | 15 | TEP1             | U96180    | 10q23.3       |
| 220147_s_at | 15 | TERA             | NM_021238 | 12p11         |
| 203448_s_at | 15 | TERF1            | AI347136  | 8q13          |
| 203449_s_at | 15 | TERF1            | NM_017489 | 8q13          |
| 203611_at   | 15 | TERF2            | NM_005652 | 16q22.1       |
| 201174_s_at | 15 | TERF2IP          | NM_018975 | 16q23.1       |
| 202719_s_at | 12 | TES              | NM_015641 | 7q31.2        |
| 202720_at   | 15 | TES              | NM_015641 | 7q31.2        |
| 204106_at   | 15 | TESK1            | NM_006285 | 9p13          |
| 209215_at   | 15 | TETTRAN; TETTRAN | L11669    | 4p16.3        |
| 218104_at   | 15 | TEX10            | NM_017746 | 9q31.1        |
| 218099_at   | 15 | TEX2             | NM_018469 | 17q24.2       |
| 212083_at   | 15 | TEX261           | AV759552  | 2p13.2        |
| 218548_x_at | 14 | TEX264           | NM_015926 | 3p21.31       |
| 215758_x_at | 15 | TF34             | AC007204  | 19p13.11      |
| 203176_s_at | 13 | TFAM             | NM_003201 | 10q21         |
| 203177_x_at | 15 | TFAM             | NM_003201 | 10q21         |
| 208541_x_at | 14 | TFAM             | NM_012251 | 10q21         |
| 219169_s_at | 15 | TFB1M            | NM_016020 | 6q25.1-q25.3  |
| 218605_at   | 15 | TFB2M            | NM_022366 | 1q44          |
| 207627_s_at | 10 | TFCP2            | NM_005653 | 12q13         |
| 204147_s_at | 12 | TFDP1            | NM_007111 | 13q34         |
| 212330_at   | 15 | TFDP1            | R60866    | 13q34         |
| 203588_s_at | 15 | TFDP2            | BG034328  | 3q23          |
| 221866_at   | 14 | TFEB             | AL035588  | 6p21          |
| 50221_at    | 15 | TFEB             | AI524138  | 6p21          |
| 204623_at   | 14 | TFF3             | NM_003226 | 21q22.3       |
| 217839_at   | 15 | TFG              | NM_006070 | 3q11-q12      |
| 35671_at    | 15 | TFIIC            | U02619    | 16p12         |
| 216241_s_at | 15 | TFIIS            | X57198    | 3p22-p21.3    |
| 209676_at   | 14 | TFPI             | J03225    | 2q31-q32.1    |
| 213258_at   | 15 | TFPI             | BF511231  | 2q31-q32.1    |
| 209277_at   | 10 | TFPI2            | AL574096  | 7q22          |
| 210664_s_at | 15 | TFPIbeta         | AF021834  | 2q31-q32.1    |
| 210665_at   | 14 | TFPIbeta         | AF021834  | 2q31-q32.1    |
| 218996_at   | 13 | TFPT             | NM_013342 | 19q13         |
| 207332_s_at | 15 | TFRC             | NM_003234 | 3q26.2-qter   |
| 208691_at   | 15 | TFRC             | BC001188  | 3q26.2-qter   |
| 211573_x_at | 13 | TG2; TGC         | M98478    | 20q12         |
| 208249_s_at | 15 | TGDS             | NM_014305 | 13q32.1       |
| 205016_at   | 13 | TGFA             | NM_003236 | 2p13          |
| 209651_at   | 15 | TGFB1I1          | BC001830  | 16p11.2       |
| 209747_at   | 11 | TGFB3            | J03241    | 14q24         |
| 209591_s_at | 15 | tgf-beta         | M60316    | 20q13         |
| 201506_at   | 15 | TGFBI            | NM_000358 | 5q31          |
| 208944_at   | 15 | TGFBR2           | D50683    | 3p22 /// 3p22 |
| 204731_at   | 15 | TGFBR3           | NM_003243 | 1p33-p32      |
| 221235_s_at | 14 | TGFBRAP1         | NM_030825 | ---           |
| 203313_s_at | 15 | TGIF             | NM_003244 | 18p11.3       |
| 216262_s_at | 15 | TGIF2            | AL050318  | 20q11.2-q12   |

|             |    |         |           |             |
|-------------|----|---------|-----------|-------------|
| 218724_s_at | 14 | TGIF2   | AL050318  | 20q11.2-q12 |
| 201042_at   | 15 | TGM2    | AL031651  | ---         |
| 203833_s_at | 15 | TGOLN2  | BF061845  | 2p11.2      |
| 212040_at   | 15 | TGOLN2  | BG249599  | 2p11.2      |
| 212043_at   | 15 | TGOLN2  | W72053    | 2p11.2      |
| 220607_x_at | 15 | TH1L    | NM_016397 | 20q13       |
| 54632_at    | 14 | THADA   | AI286226  | 2p22.1      |
| 219596_at   | 14 | THAP10  | NM_020147 | 15q22.32    |
| 212910_at   | 15 | THAP11  | W19873    | 16q22.1     |
| 220417_s_at | 15 | THAP4   | NM_015963 | 2q37.3      |
| 218492_s_at | 15 | THAP7   | NM_030573 | 22q11.2     |
| 203887_s_at | 15 | THBD    | NM_000361 | 20p12-cen   |
| 203888_at   | 13 | THBD    | NM_000361 | 20p12-cen   |
| 201110_s_at | 11 | THBS1   | NM_003246 | 15q15       |
| 203083_at   | 15 | THBS2   | NM_003247 | 6q27        |
| 204776_at   | 15 | THBS4   | NM_003248 | 5q13        |
| 204565_at   | 15 | THEM2   | NM_018473 | 6p22.1      |
| 222122_s_at | 15 | THO2    | AK001758  | Xq25-q26.3  |
| 204064_at   | 15 | THOC1   | NM_005131 | 18p11.32    |
| 212994_at   | 14 | THOC2   | BE543527  | Xq25-q26.3  |
| 203235_at   | 12 | THOP1   | NM_003249 | 19q13.3     |
| 1316_at     | 13 | THRA    | X55005    | 17q11.2     |
| 201987_at   | 15 | THRAP1  | AI984051  | 17q22-q23   |
| 212207_at   | 10 | THRAP2  | BG426689  | 12q24.22    |
| 213043_s_at | 15 | THRAP4  | AI023317  | 17q21.2     |
| 221938_x_at | 14 | THRAP5  | AW262690  | 19p13.3     |
| 43544_at    | 15 | THRAP5  | AA314406  | 19p13.3     |
| 219477_s_at | 14 | THSD1   | NM_018676 | 13q14.2     |
| 218540_at   | 15 | THTPA   | NM_024328 | ---         |
| 206555_s_at | 13 | THUMPD1 | NM_017736 | 16p13.11    |
| 213025_at   | 15 | THUMPD1 | AL134904  | 16p13.11    |
| 219248_at   | 15 | THUMPD2 | NM_025264 | 2p22.2      |
| 217744_s_at | 15 | THW     | AJ251830  | 6q24        |
| 208850_s_at | 15 | THY1    | AL558479  | 11q22.3-q23 |
| 208851_s_at | 14 | THY1    | AL161958  | 11q22.3-q23 |
| 213869_x_at | 15 | THY1    | AA218868  | 11q22.3-q23 |
| 218491_s_at | 15 | THYN1   | NM_014174 | 11q25       |
| 201446_s_at | 15 | TIA1    | BF692742  | 2p13        |
| 201447_at   | 15 | TIA1    | AL567227  | 2p13        |
| 201448_at   | 15 | TIA1    | AL567227  | 2p13        |
| 201449_at   | 15 | TIA1    | AL567227  | 2p13        |
| 201450_s_at | 15 | TIA1    | NM_022037 | 2p13        |
| 217052_x_at | 11 | TIA1    | AK024108  | 2p13        |
| 217164_at   | 15 | TIA1    | AK024108  | 2p13        |
| 202039_at   | 15 | TIAF1   | NM_004740 | 17q11.2     |
| 202405_at   | 15 | TIAL1   | BF432532  | ---         |
| 202406_s_at | 15 | TIAL1   | NM_003252 | 10q         |
| 213135_at   | 14 | TIAM1   | U90902    | 21q22.1     |
| 202363_at   | 15 | TIC1    | AF231124  | 5q31        |
| 204468_s_at | 15 | TIE1    | NM_005424 | 1p34-p33    |

|             |    |               |           |                 |
|-------------|----|---------------|-----------|-----------------|
| 204391_x_at | 15 | TIF1          | AF009353  | 7q32-q34        |
| 213301_x_at | 15 | TIF1          | AL538264  | 7q32-q34        |
| 222204_s_at | 14 | TIFIA         | AL110238  | 16p12           |
| 215171_s_at | 15 | TIM17; TIM17A | AK023063  | 1q32.1          |
| 203046_s_at | 15 | TIMELESS      | NM_003920 | 12q12-q13       |
| 218408_at   | 15 | TIMM10        | NM_012456 | 11q12.1-q12.3   |
| 218188_s_at | 15 | TIMM13        | NM_012458 | 19p13.3         |
| 201821_s_at | 15 | TIMM17A       | NM_006335 | 1q32.1          |
| 201822_at   | 10 | TIMM17A       | NM_006335 | 1q32.1          |
| 203342_at   | 15 | TIMM17B       | NM_005834 | Xp11.23         |
| 218118_s_at | 15 | TIMM23        | NM_006327 | 10q11.21-q11.23 |
| 218119_at   | 15 | TIMM23        | NM_006327 | 10q11.21-q11.23 |
| 203092_at   | 14 | TIMM44        | AF026030  | 19p13.3-p13.2   |
| 203093_s_at | 15 | TIMM44        | NM_006351 | 19p13.3-p13.2   |
| 205217_at   | 12 | TIMM8A        | NM_004085 | Xq22.1          |
| 218357_s_at | 15 | TIMM8B        | NM_012459 | 11q23.1-q23.2   |
| 218316_at   | 15 | TIMM9         | NM_012460 | 14q21           |
| 201666_at   | 15 | TIMP1         | NM_003254 | Xp11.3-p11.23   |
| 203167_at   | 10 | TIMP2         | NM_003255 | 17q25           |
| 201147_s_at | 15 | TIMP3         | NM_000362 | 22q12.1-q13.2   |
| 201148_s_at | 15 | TIMP3         | AW338933  | 22q12.1-q13.2   |
| 201150_s_at | 15 | TIMP3         | NM_000362 | 22q12.1-q13.2   |
| 219058_x_at | 11 | TINAGL1       | NM_022164 | 1p35.1          |
| 220052_s_at | 12 | TINF2         | NM_012461 | 14q11.2         |
| 201922_at   | 15 | TINP1         | NM_014886 | 5q13.3          |
| 216248_s_at | 11 | TINUR         | S77154    | 2q22-q23        |
| 209154_at   | 15 | TIP-1         | AF234997  | 17p13           |
| 215464_s_at | 15 | TIP-1         | AK001327  | 17p13           |
| 208838_at   | 14 | TIP120A       | AB020636  | 12q14           |
| 208839_s_at | 15 | TIP120A       | AL136810  | 12q14           |
| 213547_at   | 15 | TIP120B       | AB014567  | 3p25.2          |
| 212665_at   | 15 | TIPARP        | AL556438  | 3q25.31         |
| 217367_s_at | 11 | TIX1          | AB007855  | 20q12           |
| 217547_x_at | 11 | TIZ           | BF308250  | 19p12           |
| 202011_at   | 15 | TJP1          | NM_003257 | 15q13           |
| 214168_s_at | 15 | TJP1          | AA813018  | 15q13           |
| 202085_at   | 15 | TJP2          | NM_004817 | 9q13-q21        |
| 47608_at    | 15 | TJP4          | AI697401  | 6p21.1          |
| 208700_s_at | 15 | tk            | L12711    | 3p14.3          |
| 204276_at   | 14 | TK2           | BE895437  | 16q22-q23.1     |
| 214183_s_at | 10 | TKR; TKT2     | X91817    | Xq28            |
| 208699_x_at | 12 | TKT           | BF696840  | 3p14.3          |
| 203221_at   | 15 | TLE1          | NM_005077 | 9q21.32         |
| 40837_at    | 15 | TLE2          | M99436    | 19p13.3         |
| 206472_s_at | 11 | TLE3          | NM_005078 | 15q22           |
| 204872_at   | 15 | TLE4          | NM_007005 | 9q21.32         |
| 202606_s_at | 15 | TLK1          | NM_012290 | 2q31.1          |
| 212997_s_at | 15 | TLK2          | AU151689  | 17q23           |
| 215843_s_at | 15 | TLL2          | AK026106  | 10q23-q24       |
| 203254_s_at | 13 | TLN1          | NM_006289 | 9p13            |

|             |    |          |           |              |
|-------------|----|----------|-----------|--------------|
| 212701_at   | 11 | TLN2     | AB002318  | 15q15-q21    |
| 212703_at   | 12 | TLN2     | AV728958  | 15q15-q21    |
| 209386_at   | 15 | TM4SF1   | AI346835  | 3q21-q25     |
| 215034_s_at | 15 | TM4SF1   | AI189753  | 3q21-q25     |
| 209655_s_at | 15 | TM4SF10  | AL136550  | Xp11.4       |
| 209656_s_at | 15 | TM4SF10  | AL136550  | Xp11.4       |
| 209525_at   | 10 | TM6SF1   | BG285017  | 15q24-q26    |
| 219892_at   | 15 | TM6SF1   | NM_023003 | 15q24-q26    |
| 204137_at   | 15 | TM7SF1   | NM_003272 | 1q42-q43     |
| 210130_s_at | 11 | TM7SF2   | AF096304  | 11q13        |
| 201078_at   | 15 | TM9SF2   | NM_004800 | 13q32.3      |
| 212194_s_at | 15 | TM9SF4   | AI418892  | 20q11.21     |
| 212198_s_at | 13 | TM9SF4   | AL515964  | 20q11.21     |
| 217730_at   | 15 | TMBIM1   | NM_022152 | 2p24.3-p24.1 |
| 219206_x_at | 15 | TMBIM4   | NM_016056 | 12q14.1-q15  |
| 204328_at   | 15 | TMC6     | NM_007267 | 17q25.3      |
| 213349_at   | 14 | TMCC1    | AI934469  | 3q21.3       |
| 213096_at   | 12 | TMCC2    | T51252    | 1q32.1       |
| 220240_s_at | 13 | TMCO3    | NM_017905 | 13q34        |
| 203679_at   | 15 | TMED1    | NM_006858 | 19p13.2      |
| 200929_at   | 15 | TMED10   | NM_006827 | 14q24.3      |
| 204426_at   | 13 | TMED2    | NM_006815 | 12q24.31     |
| 204427_s_at | 15 | TMED2    | NM_006815 | 12q24.31     |
| 208837_at   | 15 | TMED3    | BC000027  | 15q24-q25    |
| 214658_at   | 14 | TMED7    | BG286537  | 5q23.1       |
| 208757_at   | 15 | TMED9    | BC001123  | 5q35.3       |
| 205122_at   | 14 | TMEFF1   | BF439316  | 9q31         |
| 219230_at   | 15 | TMEM100  | NM_018286 | 17q23.1      |
| 201764_at   | 15 | TMEM106C | NM_024056 | 12q13.1      |
| 201361_at   | 15 | TMEM109  | NM_024092 | 11q12.2      |
| 203437_at   | 15 | TMEM11   | NM_003876 | 17p11.2      |
| 217882_at   | 15 | TMEM111  | NM_018447 | 3p25.3       |
| 218477_at   | 15 | TMEM14A  | NM_014051 | 6p12.3       |
| 221452_s_at | 15 | TMEM14B  | NM_030969 | 6p25.1-p23   |
| 218804_at   | 15 | TMEM16A  | NM_018043 | 11q13.2      |
| 218910_at   | 10 | TMEM16K  | NM_018075 | 3p21.32      |
| 212989_at   | 15 | TMEM23   | AI377497  | 10q11.2      |
| 217743_s_at | 15 | TMEM30A  | NM_018247 | 6q14.1       |
| 213285_at   | 10 | TMEM30B  | AV691491  | 14q23.1      |
| 218465_at   | 15 | TMEM33   | NM_018126 | 4p14         |
| 218772_x_at | 15 | TMEM38B  | NM_018112 | 9q31.3       |
| 218615_s_at | 15 | TMEM39A  | AA194996  | 3q13.33      |
| 218770_s_at | 14 | TMEM39B  | NM_018056 | 1p34.3       |
| 202857_at   | 15 | TMEM4    | NM_014255 | 12q15        |
| 209796_s_at | 15 | TMEM4    | BC001027  | 12q15        |
| 209797_at   | 15 | TMEM4    | BC001027  | 12q15        |
| 219503_s_at | 10 | TMEM40   | AI087937  | 3p25.2       |
| 217795_s_at | 15 | TMEM43   | NM_024334 | 3p25.1       |
| 219410_at   | 15 | TMEM45A  | NM_018004 | 3q12.3       |
| 218073_s_at | 12 | TMEM48   | NM_018087 | 1p32.3       |

|             |    |                 |           |               |
|-------------|----|-----------------|-----------|---------------|
| 220990_s_at | 15 | TMEM49          | NM_030938 | 17q23.2       |
| 204807_at   | 12 | TMEM5           | BF224146  | 12q14.1       |
| 204808_s_at | 15 | TMEM5           | NM_014254 | 12q14.1       |
| 217766_s_at | 15 | TMEM50A         | NM_014313 | 1p36.11       |
| 219600_s_at | 15 | TMEM50B         | BC000569  | 21q22.11      |
| 200620_at   | 15 | TMEM59          | NM_004872 | 1p36-p31      |
| 218776_s_at | 14 | TMEM62          | NM_024956 | 15q15.1       |
| 202700_s_at | 12 | TMEM63A         | NM_014698 | 1q42.13       |
| 200847_s_at | 15 | TMEM66          | NM_016127 | 8p12          |
| 219449_s_at | 15 | TMEM70          | BC002748  | 8q13.3        |
| 221882_s_at | 15 | TMEM8           | AI636233  | 16p13.3       |
| 221255_s_at | 15 | TMEM93          | NM_031298 | 17p13.3       |
| 218065_s_at | 15 | TMEM9B          | NM_020644 | 11p15.3       |
| 213024_at   | 14 | TMF1            | BF593908  | 3p21-p12      |
| 214948_s_at | 15 | TMF1            | AL050136  | ---           |
| 203661_s_at | 15 | TMOD1           | NM_003275 | 9q22.3        |
| 203662_s_at | 15 | TMOD1           | NM_003275 | 9q22.3        |
| 213161_at   | 15 | TMOD1           | AI583393  | ---           |
| 212352_s_at | 15 | TMP21           | BE780075  | 14q24.3       |
| 203432_at   | 15 | TMPO            | AW272611  | 12q22         |
| 210986_s_at | 15 | TMSA            | Z24727    | 15q22.1       |
| 211921_x_at | 15 | TMSA; MGC104802 | AF348514  | --- /// ---   |
| 217733_s_at | 15 | TMSB10          | NM_021103 | 2p11.2        |
| 216438_s_at | 15 | TMSB4X          | AL133228  | ---           |
| 205347_s_at | 15 | TMSL8           | NM_021992 | Xq21.33-q22.3 |
| 201645_at   | 12 | TNC             | NM_002160 | 9q33          |
| 209904_at   | 15 | TNC; TNNC       | AF020769  | 3p21.3-p14.3  |
| 201207_at   | 15 | TNFAIP1         | NM_021137 | 17q22-q23     |
| 202510_s_at | 15 | TNFAIP2         | NM_006291 | 14q32         |
| 202643_s_at | 11 | TNFAIP3         | AI738896  | 6q23          |
| 202644_s_at | 15 | TNFAIP3         | NM_006290 | 6q23          |
| 206025_s_at | 15 | TNFAIP6         | AW188198  | 2q24.1        |
| 206026_s_at | 15 | TNFAIP6         | NM_007115 | 2q24.1        |
| 208296_x_at | 15 | TNFAIP8         | NM_014350 | 5q23.1        |
| 210260_s_at | 15 | TNFAIP8         | BC005352  | 5q23.1        |
| 218368_s_at | 14 | TNFRSF12A       | NM_016639 | 16p13.3       |
| 207643_s_at | 15 | TNFRSF1A        | NM_001065 | 12p13.2       |
| 203508_at   | 14 | TNFRSF1B        | NM_001066 | 1p36.3-p36.2  |
| 218856_at   | 10 | TNFRSF21        | NM_016629 | 6p21.1-12.2   |
| 202687_s_at | 10 | TNFSF10         | NM_003810 | 3q26          |
| 202688_at   | 15 | TNFSF10         | NM_003810 | 3q26          |
| 214329_x_at | 13 | TNFSF10         | AW474434  | 3q26          |
| 218467_at   | 15 | TNFSF5IP1       | NM_020232 | 18p11.21      |
| 206907_at   | 11 | TNFSF9          | NM_003811 | 19p13.3       |
| 211828_s_at | 11 | TNIK            | AF172268  | 3q26.31       |
| 213107_at   | 15 | TNIK            | R59093    | 3q26.31       |
| 213109_at   | 14 | TNIK            | N25621    | 3q26.31       |
| 207196_s_at | 15 | TNIP1           | NM_006058 | 5q32-q33.1    |
| 48531_at    | 15 | TNIP2           | AA522816  | 4p16.3        |
| 217149_x_at | 14 | TNK1            | AF097738  | ---           |

|             |    |            |           |                   |
|-------------|----|------------|-----------|-------------------|
| 203839_s_at | 14 | TNK2       | AI146308  | 3q29              |
| 202561_at   | 15 | TNKS       | AF070613  | 8p23.1            |
| 218228_s_at | 15 | TNKS2      | BF060683  | 10q23.3           |
| 205177_at   | 15 | TNNI1      | NM_003281 | 1q31.3            |
| 205742_at   | 15 | TNNI3      | NM_000363 | 19q13.4           |
| 220415_at   | 15 | TNNI3K     | NM_015978 | 1p31.1            |
| 215389_s_at | 15 | TNNT2      | X79857    | 1q32              |
| 205693_at   | 12 | TNNT3      | NM_006757 | 11p15.5           |
| 207657_x_at | 15 | TNPO1      | NM_002270 | 5q13.2            |
| 209225_x_at | 14 | TNPO1      | AI653355  | 5q13.2            |
| 212635_at   | 15 | TNPO1      | AW161626  | 5q13.2            |
| 221829_s_at | 15 | TNPO1      | AI307759  | 5q13.2            |
| 221506_s_at | 15 | TNPO2      | BG258639  | 19p13.2           |
| 221507_at   | 15 | TNPO2      | BG258639  | 19p13.2           |
| 212318_at   | 15 | TNPO3      | AK022910  | 7q32.3            |
| 211342_x_at | 15 | TNRC11     | BC004354  | ---               |
| 212261_at   | 15 | TNRC15     | AB014542  | 2q37.1            |
| 217931_at   | 12 | TNRC5      | BC004423  | 6pter-p12.1       |
| 213254_at   | 13 | TNRC6B     | N64803    | 22q13.2           |
| 221747_at   | 15 | TNS        | AL046979  | 2q35-q36          |
| 221748_s_at | 15 | TNS        | AL046979  | 2q35-q36          |
| 218864_at   | 14 | TNS1       | NM_022648 | 2q35-q36          |
| 217853_at   | 15 | TNS3       | NM_022748 | 7p12.3            |
| 206093_x_at | 13 | TNXB       | NM_007116 | 6p21.3            |
| 208609_s_at | 13 | TNXB       | NM_019105 | 6p21.3 /// 6p21.3 |
| 213451_x_at | 15 | TNXB       | BE044614  | 6p21.3            |
| 202704_at   | 15 | TOB1       | AA675892  | 17q21             |
| 222243_s_at | 15 | TOB2       | AB051450  | 22q13.2-q13.31    |
| 208880_s_at | 14 | TOM; ANT-1 | AB019219  | 20q13.33          |
| 202807_s_at | 14 | TOM1       | NM_005488 | 22q13.1           |
| 204485_s_at | 15 | TOM1L1     | NM_005486 | 17q23.2           |
| 200662_s_at | 15 | TOMM20     | NM_014765 | 1q42              |
| 212773_s_at | 15 | TOMM20     | BG165094  | 1q42              |
| 217960_s_at | 14 | TOMM22     | NM_020243 | 22q12-q13         |
| 201870_at   | 13 | TOMM34     | NM_006809 | ---               |
| 202264_s_at | 15 | TOMM40     | NM_006114 | 19q13             |
| 201812_s_at | 15 | TOMM7      | NM_019059 | 7p15.3            |
| 201512_s_at | 15 | TOMM70A    | BC003633  | 3q12.3            |
| 201519_at   | 15 | TOMM70A    | NM_014820 | 3q12.3            |
| 208901_s_at | 15 | TOP1       | J03250    | 20q12-q13.1       |
| 201291_s_at | 14 | TOP2A      | AU159942  | 17q21-q22         |
| 201292_at   | 15 | TOP2A      | AL561834  | 17q21-q22         |
| 211987_at   | 15 | TOP2B      | NM_001068 | 3p24              |
| 202633_at   | 15 | TOPBP1     | NM_007027 | 3q22.1            |
| 204071_s_at | 14 | TOPORS     | NM_005802 | 9p21              |
| 78383_at    | 15 | TOPORS     | AI150117  | ---               |
| 202348_s_at | 15 | TOR1A      | BC000674  | 9q34              |
| 204529_s_at | 15 | TOX        | AI961231  | 8q12.1            |
| 209753_s_at | 15 | TP         | AF113682  | 12q22             |
| 203050_at   | 11 | TP53BP1    | NM_005657 | 15q15-q21         |

|             |    |               |           |               |
|-------------|----|---------------|-----------|---------------|
| 203120_at   | 15 | TP53BP2       | NM_005426 | 1q42.1        |
| 210609_s_at | 14 | TP53I3        | BC000474  | 2p24.1        |
| 218095_s_at | 15 | TPARL         | BC003545  | 4q12          |
| 203476_at   | 15 | TPBG          | NM_006670 | 6q14-q15      |
| 217914_at   | 11 | TPCN1         | NM_017901 | 12q24.21      |
| 201688_s_at | 14 | TPD52         | BG389015  | 8q21          |
| 201689_s_at | 15 | TPD52         | NM_005079 | 8q21          |
| 201690_s_at | 15 | TPD52         | AA524023  | 8q21          |
| 201379_s_at | 15 | TPD52L2       | NM_003288 | 20q13.2-q13.3 |
| 200822_x_at | 15 | TPI1          | NM_000365 | 12p13         |
| 213011_s_at | 15 | TPI1          | BF116254  | ---           |
| 221218_s_at | 14 | TPK1          | NM_022445 | 7q34-q35      |
| 206116_s_at | 15 | TPM1          | NM_000366 | 15q22.1       |
| 206117_at   | 15 | TPM1          | NM_000366 | 15q22.1       |
| 210987_x_at | 15 | TPM1          | M19267    | ---           |
| 204083_s_at | 15 | TPM2          | NM_003289 | 9p13.2-p13.1  |
| 212654_at   | 15 | TPM2          | AL566786  | 9p13.2-p13.1  |
| 212481_s_at | 15 | TPM3          | AI214061  | 19p13.1       |
| 209344_at   | 15 | TPM4          | BC002827  | 19p13.1       |
| 203672_x_at | 15 | TPMT          | U12387    | 6p22.3        |
| 200742_s_at | 15 | TPP1          | BG231932  | 11p15         |
| 200743_s_at | 15 | TPP1          | NM_000391 | 11p15         |
| 203374_s_at | 10 | TPP2          | AW612376  | 13q32-q33     |
| 203375_s_at | 15 | TPP2          | NM_003291 | 13q32-q33     |
| 201730_s_at | 15 | TPR           | BF110993  | 1q25          |
| 201731_s_at | 15 | TPR           | NM_003292 | 1q25          |
| 220865_s_at | 15 | TPRT          | NM_014317 | 10p12.2       |
| 204140_at   | 14 | TPST1         | NM_003596 | 7q11.21       |
| 204079_at   | 14 | TPST2         | NM_003595 | 22q12.1       |
| 211943_x_at | 15 | TPT1          | AL565449  | 13q12-q14     |
| 212284_x_at | 15 | TPT1          | BG498776  | 13q12-q14     |
| 212869_x_at | 15 | TPT1          | AI721229  | 13q12-q14     |
| 214327_x_at | 15 | TPT1          | AI888178  | 13q12-q14     |
| 216520_s_at | 15 | TPT1          | AF072098  | ---           |
| 216540_at   | 10 | TRA@          | X61072    | ---           |
| 200598_s_at | 15 | TRA1          | AI582238  | 12q24.2-q24.3 |
| 200599_s_at | 15 | TRA1          | NM_003299 | 12q24.2-q24.3 |
| 204658_at   | 15 | TRA2A         | NM_013293 | 7p15.3        |
| 213593_s_at | 14 | TRA2A         | AW978896  | 7p15.3        |
| 210180_s_at | 11 | TRA2B         | U87836    | 3q26.2-q27    |
| 209965_s_at | 11 | TRAD-d1       | AB016223  | 17q11         |
| 209451_at   | 12 | TRAF2; I-TRAF | U59863    | 2q24-q31      |
| 204352_at   | 15 | TRAF5         | NM_004619 | 1q32          |
| 202079_s_at | 15 | TRAK1         | NM_014965 | 3p25.3-p24.1  |
| 202080_s_at | 15 | TRAK1         | NM_014965 | 3p25.3-p24.1  |
| 202124_s_at | 15 | TRAK2         | NM_015049 | 2q33          |
| 202125_s_at | 15 | TRAK2         | NM_015049 | 2q33          |
| 201398_s_at | 15 | TRAM1         | BC000687  | 8q13.2        |
| 201399_s_at | 15 | TRAM1         | BC000687  | 8q13.2        |
| 202369_s_at | 14 | TRAM2         | NM_012288 | 6p21.1-p12    |



|             |    |                  |           |                     |
|-------------|----|------------------|-----------|---------------------|
| 201391_at   | 15 | TRAP1            | NM_016292 | 16p13.3             |
| 201986_at   | 15 | TRAP240          | AB011165  | 17q22-q23           |
| 219351_at   | 10 | TRAPPC2          | NM_014563 | Xp22                |
| 203512_at   | 15 | TRAPPC3          | NM_014408 | 1p34.3              |
| 217958_at   | 15 | TRAPPC4          | NM_016146 | 11q23.3             |
| 217959_s_at | 15 | TRAPPC4          | NM_016146 | 11q23.3             |
| 204985_s_at | 15 | TRAPPC6A         | NM_024108 | 19q13.32            |
| 213193_x_at | 12 | TRBV19 /// TRBC1 | AL559122  | ---                 |
| 209510_at   | 15 | TRC8             | AF064801  | 8q24                |
| 213334_x_at | 15 | TREX2            | BE676218  | Xq28                |
| 218425_at   | 15 | TRIAD3           | BC000787  | 7p22.2              |
| 202241_at   | 14 | TRIB1            | NM_025195 | 8q24.13             |
| 202478_at   | 15 | TRIB2            | NM_021643 | 2p25.1              |
| 202479_s_at | 15 | TRIB2            | BC002637  | 2p25.1              |
| 218145_at   | 13 | TRIB3            | NM_021158 | 20p13-p12.2         |
| 204341_at   | 14 | TRIM16           | NM_006470 | 17p11.2             |
| 202342_s_at | 15 | TRIM2            | NM_015271 | 4q31.3              |
| 213293_s_at | 15 | TRIM22           | AA083478  | 11p15               |
| 204732_s_at | 15 | TRIM23           | AI021991  | 5q12.3              |
| 202702_at   | 13 | TRIM26           | NM_003449 | 6p21.3              |
| 200990_at   | 15 | TRIM28           | NM_005762 | 19q13.4             |
| 213885_at   | 14 | TRIM3            | AA114843  | 11p15.5             |
| 203846_at   | 15 | TRIM32           | BC003154  | 9q33.2              |
| 212435_at   | 15 | TRIM33           | AA205593  | ---                 |
| 203568_s_at | 10 | TRIM38           | NM_006355 | 6p21.3              |
| 203610_s_at | 12 | TRIM38           | AI363270  | 6p21.3              |
| 217759_at   | 15 | TRIM44           | AA176780  | 11p13               |
| 217760_at   | 15 | TRIM44           | AA176780  | 11p13               |
| 219923_at   | 14 | TRIM45           | NM_025188 | 1p12                |
| 221897_at   | 15 | TRIM52           | AA205660  | 5q35.3              |
| 213748_at   | 12 | TRIM66           | AW271713  | 11p15.3             |
| 219405_at   | 13 | TRIM68           | NM_018073 | 11p15.4             |
| 221012_s_at | 15 | TRIM8            | NM_030912 | 10q24.3 /// 10q24.3 |
| 209011_at   | 13 | TRIO             | BF223718  | 5p15.1-p14          |
| 209012_at   | 15 | TRIO             | AV718192  | 5p15.1-p14          |
| 202795_x_at | 15 | TRIOBP           | NM_007032 | 22q13.1             |
| 208756_at   | 15 | TRIP1            | U36764    | 1p34.1              |
| 202734_at   | 15 | TRIP10           | NM_004240 | 19p13.3             |
| 201546_at   | 15 | TRIP12           | NM_004238 | 2q37.1              |
| 204033_at   | 15 | TRIP13           | NM_004237 | 5p15.33             |
| 209778_at   | 11 | Trip230          | AF007217  | 14q31-q32           |
| 212544_at   | 15 | TRIP3            | AI131008  | 17q21.1             |
| 203732_at   | 15 | TRIP4            | NM_016213 | 15q22.1             |
| 209377_s_at | 15 | TRIP7            | AF274949  | 6q14.3              |
| 218617_at   | 15 | TRIT1            | NM_017646 | 1p35.3-p34.1        |
| 217033_x_at | 12 | trkC             | S76475    | 15q25               |
| 213634_s_at | 12 | TRMT1            | AL031588  | 22q13               |
| 219299_at   | 13 | TRMT12           | NM_017956 | 8q24.13             |
| 211700_s_at | 15 | TRO              | AF349719  | Xp11.22-p11.21      |
| 211701_s_at | 15 | TRO              | AF349720  | Xp11.22-p11.21      |

|             |    |               |           |                     |
|-------------|----|---------------|-----------|---------------------|
| 201713_s_at | 14 | TRP1          | D42063    | 2q12.3              |
| 205802_at   | 15 | TRPC1         | NM_003304 | 3q22-q24            |
| 205803_s_at | 15 | TRPC1         | NM_003304 | 3q22-q24            |
| 212059_s_at | 15 | TRPC4AP       | AL117480  | 20q11.23            |
| 218502_s_at | 11 | TRPS1         | NM_014112 | 8q24.12             |
| 219282_s_at | 15 | TRPV2         | NM_015930 | 17p11.2 /// 17p11.2 |
| 202642_s_at | 15 | TRRAP         | NM_003496 | 7q21.2-q22.1        |
| 218977_s_at | 13 | TRSPAP1       | BC000680  | 1p35.2              |
| 208864_s_at | 15 | TRX; MGC61975 | AF313911  | 9q31                |
| 210803_at   | 11 | TRXR2A        | AF201385  | 22q11.21            |
| 202061_s_at | 15 | TSA305        | AB020335  | 14q24.3-q31         |
| 218872_at   | 15 | TSC           | NM_017899 | 12q24.23            |
| 209390_at   | 15 | TSC1          | AF013168  | 9q34                |
| 215735_s_at | 15 | TSC2          | AC005600  | 16p13.3             |
| 215111_s_at | 15 | TSC22         | AK027071  | 13q14               |
| 204094_s_at | 15 | TSC22D2       | NM_014779 | 3q25.1              |
| 218132_s_at | 15 | TSEN34        | NM_024075 | 19q13.4             |
| 201758_at   | 15 | TSG101        | NM_006292 | 11p15               |
| 201513_at   | 15 | TSN           | NM_004622 | 2q21.1              |
| 201515_s_at | 15 | TSN           | NM_004622 | 2q21.1              |
| 203983_at   | 15 | TSNAX         | NM_005999 | 1q42.1              |
| 219274_at   | 15 | TSPAN12       | NM_012338 | 7q31.31             |
| 217979_at   | 15 | TSPAN13       | NM_014399 | 7p21.2              |
| 221002_s_at | 15 | TSPAN14       | NM_030927 | 10q23.1 /// 10q23.1 |
| 218693_at   | 13 | TSPAN15       | NM_012339 | 10q22.1             |
| 214606_at   | 10 | TSPAN2        | BF129969  | 1p13.1              |
| 200972_at   | 15 | TSPAN3        | BC000704  | 15q24.1             |
| 200973_s_at | 15 | TSPAN3        | NM_005724 | 15q24.1             |
| 220558_x_at | 14 | TSPAN32       | NM_005705 | 11p15.5             |
| 209263_x_at | 15 | TSPAN4        | BC000389  | 11p15.5             |
| 209264_s_at | 13 | TSPAN-4       | AF054841  | 11p15.5             |
| 209108_at   | 15 | TSPAN-6       | AF053453  | Xq22                |
| 209109_s_at | 14 | TSPAN-6       | AF053453  | Xq22                |
| 202242_at   | 15 | TSPAN7        | NM_004615 | Xp11.4              |
| 220968_s_at | 15 | TSPAN9        | NM_031285 | 12p13.3 /// 12p13.3 |
| 221493_at   | 15 | TSPYL         | AL136629  | 6q22-q23            |
| 218012_at   | 10 | TSPYL2        | NM_022117 | Xp11.2              |
| 212928_at   | 15 | TSPYL4        | AL050331  | 6q22.31             |
| 213122_at   | 15 | TSPYL5        | AI096375  | 8q22.1              |
| 217968_at   | 10 | TSSC1         | NM_003310 | 2p25.3              |
| 209781_s_at | 15 | T-Star        | AF069681  | 8q24.2              |
| 213922_at   | 14 | TTBK2         | AW294686  | ---                 |
| 218034_at   | 15 | TTC11         | NM_016068 | 7q22.1              |
| 203122_at   | 12 | TTC15         | NM_016030 | 2p25.3              |
| 218972_at   | 14 | TTC17         | NM_018259 | 11p11.2             |
| 217964_at   | 15 | TTC19         | NM_017775 | 17p11.2             |
| 219838_at   | 13 | TTC23         | NM_022905 | 15q26.3             |
| 208073_x_at | 15 | TTC3          | NM_003316 | 21q22.2             |
| 208662_s_at | 15 | TTC3          | AI885338  | 21q22.2             |
| 208663_s_at | 14 | TTC3          | AI652848  | 21q22.2             |

|             |    |                 |           |                         |
|-------------|----|-----------------|-----------|-------------------------|
| 46167_at    | 15 | TTC4            | W22690    | 1p31.3                  |
| 204771_s_at | 15 | TTF1            | NM_007344 | 9q34.3                  |
| 204772_s_at | 13 | TTF1            | NM_007344 | 9q34.3                  |
| 204822_at   | 15 | TTK             | NM_003318 | 6q13-q21                |
| 205652_s_at | 15 | TTLL1           | NM_012263 | 22q13.1                 |
| 208195_at   | 15 | TTN             | NM_003319 | 2q31                    |
| 222258_s_at | 15 | TTP; BOG25      | AF015043  | 2q37.1-q37.2            |
| 202266_at   | 15 | TTRAP           | NM_016614 | 6p22.3-p22.1            |
| 212242_at   | 15 | TUBA1           | AL565074  | 2q36.1                  |
| 209118_s_at | 15 | TUBA3           | AF141347  | 12q12-12q14.3           |
| 209251_x_at | 15 | TUBA6           | BC004949  | 12q12-q14               |
| 211750_x_at | 15 | TUBA6           | BC005946  | 12q12-q14 /// 12q12-q14 |
| 211714_x_at | 15 | TUBB            | BC005838  | 6p21.32 /// 6p21.32     |
| 213726_x_at | 15 | TUBB2           | AA515698  | ---                     |
| 204141_at   | 15 | TUBB2A          | NM_001069 | 6p25                    |
| 208977_x_at | 15 | TUBB2C          | BC004188  | ---                     |
| 202154_x_at | 15 | TUBB3           | NM_006086 | 16q24.3                 |
| 213476_x_at | 15 | TUBB3           | AL565749  | 16q24.3                 |
| 209191_at   | 15 | TUBB6           | BC002654  | 18p11.21                |
| 210389_x_at | 15 | TUBD1           | BC000258  | 17q23.2                 |
| 201714_at   | 15 | TUBG1           | NM_001070 | 17q21                   |
| 203894_at   | 15 | TUBG2           | NM_016437 | 17q21                   |
| 202477_s_at | 15 | TUBGCP2         | NM_006659 | 10q26.3                 |
| 203690_at   | 14 | TUBGCP3         | NM_006322 | 13q34                   |
| 205854_at   | 15 | TUBL3; MGC45295 | AK024246  | 12p13.3                 |
| 201113_at   | 15 | TUFM            | NM_003321 | 16p11.2                 |
| 205807_s_at | 15 | TUFT1           | NM_020127 | 1q21                    |
| 222244_s_at | 15 | TUG1            | AK000749  | 22q12.2                 |
| 218184_at   | 12 | TULP4           | NM_020245 | 6q25-q26                |
| 203272_s_at | 10 | TUSC2           | NM_007275 | 3p21.3                  |
| 203273_s_at | 10 | TUSC2           | NM_007275 | 3p21.3                  |
| 209227_at   | 15 | TUSC3           | AU158251  | 8p22                    |
| 213423_x_at | 15 | TUSC3           | AI884858  | 8p22                    |
| 203246_s_at | 15 | TUSC4           | NM_006545 | 3p21.3                  |
| 213943_at   | 15 | TWIST1          | X99268    | 7p21.2                  |
| 209310_s_at | 10 | TX              | U25804    | 11q22.2-q22.3           |
| 209077_at   | 15 | TXN2            | AL022313  | 22q13.1                 |
| 208097_s_at | 13 | TXNDC           | NM_030755 | 14q22.1 /// 14q22.1     |
| 209476_at   | 15 | TXNDC           | AL080080  | 14q22.1                 |
| 201175_at   | 15 | TXNDC14         | NM_015959 | 11cen-q22.3             |
| 208957_at   | 14 | TXNDC4          | BF439241  | 9q31.1                  |
| 208958_at   | 12 | TXNDC4          | AI827677  | 9q31.1                  |
| 208959_s_at | 15 | TXNDC4          | BC005374  | 9q31.1                  |
| 221253_s_at | 15 | TXNDC5          | NM_030810 | 6p24.3 /// 6p24.3       |
| 216640_s_at | 15 | TXNDC7          | AK026926  | ---                     |
| 203008_x_at | 15 | TXNDC9          | NM_005783 | 2q11.2                  |
| 211758_x_at | 15 | TXNDC9          | BC005968  | 2q11.2 /// 2q11.2       |
| 201008_s_at | 15 | TXNIP           | NM_006472 | 1q21.2                  |
| 201009_s_at | 15 | TXNIP           | NM_006472 | 1q21.2                  |

|             |    |           |           |                                |
|-------------|----|-----------|-----------|--------------------------------|
| 201010_s_at | 15 | TXNIP     | NM_006472 | 1q21.2                         |
| 201588_at   | 15 | TXNL1     | NM_004786 | 18q21.31                       |
| 216532_x_at | 11 | TXNL2     | AL138831  | ---                            |
| 202836_s_at | 15 | TXNL4A    | BC001046  | 18q23                          |
| 218794_s_at | 10 | TXNL4B    | AW194729  | 16q22.2                        |
| 201266_at   | 15 | TXNRD1    | NM_003330 | 12q23-q24.1                    |
| 205546_s_at | 15 | TYK2      | NM_003331 | 19p13.2                        |
| 202589_at   | 15 | TYMS      | NM_001071 | 18p11.32                       |
| 204122_at   | 15 | TYROBP    | NM_003332 | 19q13.1                        |
| 205694_at   | 14 | TYRP1     | NM_000550 | 9p23                           |
| 209422_at   | 15 | TZP       | AY027523  | 20q11.22-q11.23                |
| 205300_s_at | 14 | U1SNRNPBP | NM_022717 | 12q24.31                       |
| 202858_at   | 15 | U2AF1     | NM_006758 | 21q22.3                        |
| 208174_x_at | 15 | U2AF1L2   | NM_005089 | Xp22.1                         |
| 213876_x_at | 15 | U2AF1L2   | AW089584  | Xp22.1                         |
| 219690_at   | 10 | U2AF1L4   | NM_024660 | 19q13.13                       |
| 218381_s_at | 15 | U2AF2     | NM_007279 | 19q13.43                       |
| 209340_at   | 15 | UAP1      | S73498    | 1q23.2                         |
| 201177_s_at | 15 | UBA2      | NM_005499 | 19q12                          |
| 221700_s_at | 15 | UBA52     | AF348700  | 19p13.1-p12 ///<br>19p13.1-p12 |
| 202151_s_at | 15 | UBADC1    | NM_016172 | 9q34.3                         |
| 46270_at    | 15 | UBAP1     | AL039447  | 9p22-p21                       |
| 219192_at   | 12 | UBAP2     | NM_018449 | 9p13.2                         |
| 221839_s_at | 15 | UBAP2     | AK026088  | 9p13.2                         |
| 201377_at   | 14 | UBAP2L    | NM_014847 | 1q22                           |
| 201378_s_at | 10 | UBAP2L    | NM_014847 | 1q22                           |
| 209947_at   | 15 | UBAP2L    | BC003170  | 1q22                           |
| 214695_at   | 13 | UBAP2L    | AW051361  | 1q22                           |
| 200633_at   | 15 | UBB       | NM_018955 | 17p12-p11.2                    |
| 217144_at   | 11 | UBBP1     | X04801    | ---                            |
| 211296_x_at | 15 | UBC       | AB009010  | 12q24.3                        |
| 217823_s_at | 15 | Ubc6p     | AF151039  | 6q16.1                         |
| 217825_s_at | 15 | Ubc6p     | AF151039  | 6q16.1                         |
| 217826_s_at | 15 | Ubc6p     | AF151039  | 6q16.1                         |
| 210024_s_at | 15 | UbcH9     | AB017644  | 2q32.1                         |
| 200964_at   | 15 | UBE1      | NM_003334 | Xp11.23                        |
| 209115_at   | 15 | UBE1C     | AL117566  | 3p24.3-p13                     |
| 218289_s_at | 15 | UBE1DC1   | NM_024818 | 3q22.1                         |
| 1294_at     | 15 | UBE1L     | L13852    | 3p21                           |
| 201898_s_at | 15 | UBE2A     | NM_003336 | Xq24-q25                       |
| 201899_s_at | 15 | UBE2A     | NM_003336 | Xq24-q25                       |
| 202333_s_at | 15 | UBE2B     | NM_003337 | 5q23-q31                       |
| 202334_s_at | 15 | UBE2B     | AI768723  | 5q23-q31                       |
| 202335_s_at | 10 | UBE2B     | NM_003337 | 5q23-q31                       |
| 211763_s_at | 15 | UBE2B     | BC005979  | 5q23-q31 /// 5q23-<br>q31      |
| 202954_at   | 15 | UBE2C     | NM_007019 | 20q13.12                       |
| 211764_s_at | 15 | UBE2D1    | BC005980  | 10q11.2-q21 ///<br>10q11.2-q21 |
| 214590_s_at | 12 | UBE2D1    | AL545760  | 10q11.2-q21                    |

|             |    |        |           |              |
|-------------|----|--------|-----------|--------------|
| 201343_at   | 15 | UBE2D2 | BE621259  | 5q31.3       |
| 201344_at   | 15 | UBE2D2 | BF196642  | 5q31.3       |
| 201345_s_at | 15 | UBE2D2 | NM_003339 | 5q31.3       |
| 200667_at   | 15 | UBE2D3 | BF448062  | 4q24         |
| 200668_s_at | 15 | UBE2D3 | BC003395  | 4q24         |
| 200669_s_at | 15 | UBE2D3 | NM_003340 | 4q24         |
| 218837_s_at | 13 | UBE2D4 | NM_015983 | 7p13         |
| 212519_at   | 15 | UBE2E1 | AL518159  | 3p24.2-p24.1 |
| 209141_at   | 15 | UBE2G1 | AW299555  | 1q42         |
| 209142_s_at | 15 | UBE2G1 | BC002775  | 1q42         |
| 209041_s_at | 11 | UBE2G2 | BG395660  | 21q22.3      |
| 209042_s_at | 15 | UBE2G2 | BC001738  | 21q22.3      |
| 221962_s_at | 15 | UBE2H  | AI829920  | 7q32         |
| 208760_at   | 15 | UBE2I  | AL031714  | 16p13.3      |
| 213535_s_at | 15 | UBE2I  | AA910614  | 16p13.3      |
| 200676_s_at | 15 | UBE2L3 | NM_003347 | 22q11.21     |
| 200682_s_at | 15 | UBE2L3 | NM_003347 | 22q11.21     |
| 200683_s_at | 14 | UBE2L3 | BE964689  | 22q11.21     |
| 200684_s_at | 15 | UBE2L3 | NM_003347 | 22q11.21     |
| 201649_at   | 15 | UBE2L6 | NM_004223 | 11q12        |
| 203109_at   | 11 | UBE2M  | NM_003969 | 19q13.43     |
| 201523_x_at | 15 | UBE2N  | BE262760  | 12q22        |
| 201524_x_at | 15 | UBE2N  | NM_003348 | 12q22        |
| 212751_at   | 15 | UBE2N  | BG290646  | 12q22        |
| 217978_s_at | 15 | UBE2Q1 | NM_017582 | 1q22         |
| 202779_s_at | 15 | UBE2S  | NM_014501 | 19q13.43     |
| 201001_s_at | 15 | UBE2V1 | BG164064  | 20q13.2      |
| 201002_s_at | 15 | UBE2V1 | NM_003349 | 20q13.2      |
| 201003_x_at | 15 | UBE2V1 | NM_003349 | 20q13.2      |
| 211285_s_at | 15 | UBE3A  | U84404    | 15q11-q13    |
| 211575_s_at | 15 | UBE3A  | AF116702  | ---          |
| 213128_s_at | 15 | UBE3A  | AA527499  | 15q11-q13    |
| 213291_s_at | 15 | UBE3A  | AA160522  | 15q11-q13    |
| 212403_at   | 15 | UBE3B  | AI749193  | 12q24.12     |
| 213822_s_at | 15 | UBE3B  | BE856776  | 12q24.12     |
| 201817_at   | 15 | UBE3C  | NM_014671 | 7q36.3       |
| 202038_at   | 15 | UBE4A  | NM_004788 | 11q23.3      |
| 202317_s_at | 15 | UBE4B  | NM_006048 | 1p36.3       |
| 201535_at   | 15 | UBL3   | NM_007106 | 13q12-q13    |
| 218011_at   | 15 | UBL5   | NM_024292 | 19p13.3      |
| 209088_s_at | 15 | UBN1   | T70262    | 16p13.3      |
| 221654_s_at | 15 | UBP    | AF077040  | 15q22.3      |
| 218082_s_at | 15 | UBP1   | NM_014517 | 3p22.3       |
| 205687_at   | 15 | UBPH   | NM_019116 | 16p12        |
| 215884_s_at | 15 | UBQLN2 | AK001029  | ---          |
| 212756_s_at | 15 | UBR2   | AI761518  | 6p21.1       |
| 202692_s_at | 15 | UBTF   | NM_014233 | 17q21.3      |
| 220757_s_at | 15 | UBXD1  | NM_025241 | 19p13        |
| 212006_at   | 15 | UBXD2  | AU149908  | 2q21.3-q22.1 |
| 212007_at   | 13 | UBXD2  | AI927512  | 2q21.3-q22.1 |

|             |    |               |           |                     |
|-------------|----|---------------|-----------|---------------------|
| 212008_at   | 15 | UBXD2         | N29889    | 2q21.3-q22.1        |
| 201387_s_at | 12 | UCHL1         | NM_004181 | 4p14                |
| 204616_at   | 15 | UCHL3         | NM_006002 | 13q21.33            |
| 219960_s_at | 15 | UCHL5         | NM_015984 | 1q32                |
| 220083_x_at | 11 | UCHL5         | NM_016017 | 1q32                |
| 218533_s_at | 15 | UCKL1         | NM_017859 | 20q13.33            |
| 208998_at   | 15 | UCPH          | U94592    | 11q13 /// 11q13     |
| 218190_s_at | 15 | UCRC          | NM_013387 | 22cen-q12.3         |
| 220775_s_at | 11 | UEV3          | NM_018314 | 11p15.1             |
| 217797_at   | 15 | UFC1          | NM_016406 | 1q23.1              |
| 209103_s_at | 15 | UFD1L         | BC001049  | 22q11.21            |
| 218050_at   | 15 | UFM1          | NM_016617 | 13q13.3             |
| 204881_s_at | 15 | UGCG          | NM_003358 | 9q31                |
| 221765_at   | 10 | UGCG          | AI378044  | 9q31                |
| 218801_at   | 13 | UGCGL2        | NM_020121 | 13q32.1-q32.2       |
| 203343_at   | 14 | UGDH          | NM_003359 | 4p15.1              |
| 205480_s_at | 15 | UGP2          | NM_006759 | 2p14-p13            |
| 209326_at   | 15 | UGT           | D84454    | Xp11.23-p11.22      |
| 209333_at   | 11 | ULK1          | AB018265  | 12q24.3             |
| 204062_s_at | 15 | ULK2          | BG526973  | 17p11.2             |
| 204063_s_at | 14 | ULK2          | NM_014683 | 17p11.2             |
| 202706_s_at | 15 | UMPS          | NM_000373 | 3q13                |
| 215165_x_at | 15 | UMPS          | AL080099  | 3q13                |
| 202893_at   | 15 | UNC13B        | NM_006377 | 9p12-p11            |
| 221708_s_at | 15 | UNC45A        | BC006214  | 15q26.1 /// 15q26.1 |
| 203583_at   | 15 | UNC50         | NM_014044 | 2q11.2              |
| 41856_at    | 15 | UNC5B         | AL049370  | 10q22.2             |
| 212074_at   | 15 | UNC84A        | BE972774  | 7p22.3              |
| 214169_at   | 15 | UNC84A        | BE615699  | 7p22.3              |
| 212144_at   | 15 | UNC84B        | AL021707  | 22q13.1             |
| 202330_s_at | 15 | UNG           | NM_003362 | 12q23-q24.1         |
| 211800_s_at | 15 | UNP           | AF017306  | 3p21.3              |
| 209475_at   | 15 | UNPH4         | AF106069  | 12q14               |
| 212305_s_at | 13 | UNQ6077; ARNT | AK025122  | 1q42.12             |
| 202646_s_at | 15 | UNR           | AA167775  | 1p22                |
| 203519_s_at | 15 | UPF2          | NM_015542 | 10p14-p13           |
| 206958_s_at | 15 | UPF3          | AF318575  | 13q34               |
| 206959_s_at | 13 | UPF3          | AF318575  | 13q34               |
| 214323_s_at | 15 | UPF3A         | N36842    | 13q34               |
| 218757_s_at | 14 | UPF3B         | NM_023010 | Xq25-q26            |
| 210681_s_at | 15 | UPH           | AF153604  | 12q14               |
| 222236_s_at | 12 | UPLC1         | AK000253  | 1p36.11             |
| 203234_at   | 14 | UPP1          | NM_003364 | 7p12.3              |
| 209066_x_at | 15 | UQBP          | M26700    | 8q22                |
| 202090_s_at | 15 | UQCR          | NM_006830 | 19p13.3             |
| 205849_s_at | 15 | UQCRB         | NM_006294 | 8q22                |
| 209065_at   | 15 | UQCRB         | BC005230  | 8q22                |
| 201903_at   | 15 | UQCRC1        | NM_003365 | 3p21.3              |
| 200883_at   | 15 | UQCRC2        | NM_003366 | 16p12               |
| 212600_s_at | 15 | UQCRC2        | AV727381  | 16p12               |

|             |    |         |           |                     |
|-------------|----|---------|-----------|---------------------|
| 208909_at   | 15 | UQCRFS1 | BC000649  | 19q12-q13.1         |
| 202233_s_at | 15 | UQCRH   | NM_006004 | 1p34.1              |
| 201568_at   | 15 | UQCRQ   | NM_014402 | 5q31.1              |
| 208714_at   | 15 | UQOR1   | AF092131  | 11q13               |
| 208970_s_at | 15 | UROD    | M14016    | 1p34                |
| 208971_at   | 15 | UROD    | M14016    | 1p34                |
| 203031_s_at | 15 | UROS    | NM_000375 | 10q25.2-q26.3       |
| 202152_x_at | 15 | USF2    | NM_003367 | 19q13               |
| 215737_x_at | 15 | USF2    | X90824    | 19q13               |
| 202412_s_at | 13 | USP1    | AW499935  | 1p32.1-p31.3        |
| 202413_s_at | 15 | USP1    | AW499935  | 1p32.1-p31.3        |
| 209137_s_at | 14 | USP10   | BC000263  | 16q24.1             |
| 211702_s_at | 14 | USP10   | AF350251  | 17q23.3 /// 17q23.3 |
| 208723_at   | 15 | USP11   | BC000350  | Xp11.23             |
| 213327_s_at | 15 | USP12   | AI820101  | 13q12.2             |
| 205356_at   | 15 | USP13   | NM_003940 | 3q26.2-q26.3        |
| 201671_x_at | 10 | USP14   | BC003556  | 18p11.32            |
| 201672_s_at | 15 | USP14   | NM_005151 | 18p11.32            |
| 218386_x_at | 15 | USP16   | AI806796  | 21q22.11            |
| 218367_x_at | 14 | USP21   | NM_012475 | 1q22                |
| 200083_at   | 15 | USP22   | AA621731  | 17p11.2             |
| 212381_at   | 12 | USP24   | AB028980  | 1p32.3              |
| 212388_at   | 13 | USP24   | AB028980  | 1p32.3              |
| 220419_s_at | 15 | USP25   | NM_013396 | 21q11.2             |
| 212513_s_at | 15 | USP33   | AB029020  | 1p31.1              |
| 207365_x_at | 14 | USP34   | NM_014709 | 2p15                |
| 212066_s_at | 15 | USP34   | AB018272  | 2p15                |
| 212980_at   | 15 | USP34   | AL050376  | 2p16.1-p15          |
| 217829_s_at | 13 | USP39   | NM_006590 | 2p11.2              |
| 202681_at   | 14 | USP4    | AI346043  | 3p21.31             |
| 202682_s_at | 15 | USP4    | NM_003363 | 3p21.3              |
| 203869_at   | 13 | USP46   | AK024318  | 4q12                |
| 203870_at   | 15 | USP46   | BE856374  | 4q12                |
| 221518_s_at | 15 | USP47   | BC000226  | 11p15.3             |
| 220078_at   | 13 | USP48   | NM_018391 | 1p36.12             |
| 220079_s_at | 15 | USP48   | NM_018391 | 1p36.12             |
| 206031_s_at | 12 | USP5    | NM_003481 | 12p13               |
| 203117_s_at | 15 | USP52   | NM_014871 | 12q13.2-q13.3       |
| 206405_x_at | 13 | USP6    | NM_004505 | 17q11               |
| 201498_at   | 15 | USP7    | AI160440  | 16p13.3             |
| 201499_s_at | 15 | USP7    | NM_003470 | 16p13.3             |
| 202745_at   | 15 | USP8    | NM_005154 | 15q15.3             |
| 201099_at   | 15 | USP9X   | NM_004652 | Xp11.4              |
| 201100_s_at | 15 | USP9X   | NM_004652 | Xp11.4              |
| 204190_at   | 15 | USPL1   | NM_005800 | 13q12-q14           |
| 205139_s_at | 15 | UST     | NM_005715 | 6q24.3              |
| 218235_s_at | 15 | UTP11L  | NM_016037 | 1p34.2              |
| 221514_at   | 12 | UTP14A  | BC001149  | Xq26.1              |
| 203614_at   | 15 | UTP14C  | NM_021645 | 13q12.2-q13.3       |
| 213022_s_at | 13 | UTRN    | NM_007124 | 6q24                |

|             |    |         |           |                       |
|-------------|----|---------|-----------|-----------------------|
| 203990_s_at | 12 | UTX     | AI140752  | Xp11.2                |
| 203991_s_at | 15 | UTX     | NM_021140 | Xp11.2                |
| 203992_s_at | 15 | UTX     | AF000992  | Xp11.2                |
| 203241_at   | 15 | UVRAG   | NM_003369 | 11q13.5               |
| 219675_s_at | 15 | UXS1    | NM_025076 | 2q12.3                |
| 218495_at   | 15 | UXT     | NM_004182 | Xp11.23-p11.22        |
| 208780_x_at | 15 | VAMP    | AF154847  | 18p11.22              |
| 213326_at   | 13 | VAMP1   | AU150319  | 12p                   |
| 201556_s_at | 15 | VAMP2   | BC002737  | 17p13.1               |
| 201557_at   | 15 | VAMP2   | NM_014232 | 17p13.1               |
| 214792_x_at | 15 | VAMP2   | AI955119  | 17p13.1               |
| 201336_at   | 15 | VAMP3   | BC003570  | 1p36.23               |
| 201337_s_at | 10 | VAMP3   | NM_004781 | 1p36.23               |
| 211749_s_at | 15 | VAMP3   | BC005941  | 1p36.23 /// 1p36.23   |
| 207350_s_at | 14 | VAMP4   | NM_003762 | 1q24-q25              |
| 211760_s_at | 13 | VAMP4   | BC005974  | 1q24-q25 /// 1q24-q25 |
| 213480_at   | 15 | VAMP4   | AF052100  | 1q24-q25              |
| 204929_s_at | 15 | VAMP5   | NM_006634 | 2p11.2                |
| 202546_at   | 15 | VAMP8   | NM_003761 | 2p12-p11.2            |
| 219330_at   | 13 | VANGL1  | NM_024062 | 1p13.1                |
| 203940_s_at | 15 | VASH1   | NM_014909 | 14q24.3               |
| 202205_at   | 15 | VASP    | NM_003370 | 19q13.2-q13.3         |
| 208626_s_at | 15 | VAT1    | BC001913  | 17q21                 |
| 208898_at   | 15 | VATD    | AF077614  | ---                   |
| 208899_x_at | 15 | VATD    | AF100741  | ---                   |
| 214923_at   | 13 | VATD    | AK001155  | 14q24.1               |
| 218807_at   | 14 | VAV3    | NM_006113 | 1p13.3                |
| 201472_at   | 15 | VBP1    | NM_003372 | Xq28                  |
| 203868_s_at | 15 | VCAM1   | NM_001078 | 1p32-p31              |
| 200931_s_at | 15 | VCL     | NM_014000 | 10q22.1-q23           |
| 208648_at   | 15 | VCP     | W60953    | 9p13-p12              |
| 212038_s_at | 15 | VDAC1   | AL515918  | 5q31                  |
| 217140_s_at | 15 | VDAC1   | AJ002428  | ---                   |
| 211662_s_at | 15 | VDAC2   | L08666    | 10q22 /// 10q22       |
| 208845_at   | 15 | VDAC3   | BC002456  | ---                   |
| 201831_s_at | 12 | VDP     | BE875592  | 4q21.21               |
| 201832_s_at | 15 | VDP     | NM_003715 | 4q21.21               |
| 222316_at   | 14 | VDP     | AW973253  | ---                   |
| 214843_s_at | 15 | VDU1    | AK022864  | 1p31.1                |
| 212171_x_at | 15 | VEGF    | H95344    | 6p12                  |
| 203683_s_at | 15 | VEGFB   | NM_003377 | 11q13                 |
| 214004_s_at | 15 | VGLL4   | AI806207  | 3p25.2                |
| 208622_s_at | 14 | VIL2    | AA670344  | 6q25.2-q26            |
| 208623_s_at | 15 | VIL2    | J05021    | 6q25.2-q26            |
| 201426_s_at | 15 | VIM     | AI922599  | 10p13                 |
| 217949_s_at | 15 | VKORC1  | NM_024006 | 16p11.2               |
| 209822_s_at | 15 | VLDLRCH | L22431    | 9p24                  |
| 210512_s_at | 15 | VEGF    | AF022375  | 6p12                  |
| 210513_s_at | 15 | VEGF    | AF091352  | 6p12                  |



|             |    |             |           |                          |
|-------------|----|-------------|-----------|--------------------------|
| 211527_x_at | 15 | VEGF        | M27281    | 6p12                     |
| 213686_at   | 15 | VPS13A      | AI186145  | ---                      |
| 218396_at   | 15 | VPS13C      | NM_017684 | 15q21.3                  |
| 212323_s_at | 15 | VPS13D      | AA524553  | 1p36.21                  |
| 203459_s_at | 15 | VPS16       | NM_022575 | --- /// ---              |
| 217837_s_at | 15 | VPS24       | NM_016079 | 2p24.3-p24.1             |
| 201807_at   | 15 | VPS26A      | NM_004896 | 10q21.1                  |
| 218679_s_at | 15 | VPS28       | NM_016208 | 8q24.3                   |
| 44111_at    | 14 | VPS33B      | AI672363  | 15q26.1                  |
| 217727_x_at | 15 | VPS35       | NM_018206 | 16q12                    |
| 221704_s_at | 12 | VPS37B      | BC005882  | 12q24.31 ///<br>12q24.31 |
| 219053_s_at | 15 | VPS37C      | NM_017966 | 11q12.3                  |
| 218171_at   | 15 | VPS42       | AF195514  | 18q21.32-q21.33          |
| 209268_at   | 15 | VPS45       | AF165513  | 1q21-q22                 |
| 217913_at   | 15 | VPS4A       | NM_013245 | 16q22.1                  |
| 214585_s_at | 13 | VPS52       | AL390171  | 6p21.3                   |
| 218423_x_at | 15 | VPS54       | NM_016516 | 2p13-p14                 |
| 202261_at   | 15 | VPS72       | NM_005997 | 1q21                     |
| 203856_at   | 11 | VRK1        | NM_003384 | 14q32                    |
| 205126_at   | 14 | VRK2        | NM_006296 | 2p16-p15                 |
| 218022_at   | 13 | VRK3        | NM_016440 | 19q13                    |
| 221998_s_at | 13 | VRK3        | BF062886  | 19q13                    |
| 221999_at   | 15 | VRK3        | BF062886  | 19q13                    |
| 209946_at   | 15 | VRP; Flt4-L | U58111    | 4q34.1-q34.3             |
| 204787_at   | 10 | VSIG4       | NM_007268 | Xq12-q13.3               |
| 203797_at   | 13 | VSNL1       | AF039555  | 2p24.3                   |
| 203798_s_at | 11 | VSNL1       | NM_003385 | 2p24.3                   |
| 209452_s_at | 15 | VT11        | AF035824  | 14q24.1                  |
| 202112_at   | 15 | VWF         | NM_000552 | 12p13.3                  |
| 217742_s_at | 15 | WAC         | NM_016628 | ---                      |
| 219679_s_at | 14 | WAC         | NM_018604 | ---                      |
| 200629_at   | 15 | WARS        | NM_004184 | 14q32.31                 |
| 221725_at   | 15 | WASF2       | AI962978  | 1p36.11-p34.3            |
| 204042_at   | 15 | WASF3       | AB020707  | 13q12                    |
| 38964_r_at  | 14 | WASP        | U12707    | Xp11.4-p11.21            |
| 202663_at   | 13 | WASPIP      | AI005043  | 2q31.2                   |
| 202664_at   | 15 | WASPIP      | AW058622  | 2q31.2                   |
| 202665_s_at | 11 | WASPIP      | NM_003387 | 2q31.2                   |
| 217821_s_at | 13 | WBP11       | NM_016312 | 12p13.1                  |
| 217822_at   | 15 | WBP11       | NM_016312 | 12p13.1                  |
| 209117_at   | 15 | WBP2        | U79458    | 17q25                    |
| 203599_s_at | 15 | WBP4        | NM_007187 | 13q13.3                  |
| 217975_at   | 15 | WBP5        | NM_016303 | Xq22.2                   |
| 206621_s_at | 15 | WBSCR1      | NM_022170 | 7q11.23                  |
| 221247_s_at | 15 | WBSCR16     | NM_030798 | 7q11.23                  |
| 213670_x_at | 11 | WBSCR20B    | AI768378  | 7q11.23                  |
| 214100_x_at | 10 | WBSCR20B    | AI284845  | 7q11.23                  |
| 213460_x_at | 14 | WBSCR20C    | N29665    | 7q11.23                  |
| 221927_s_at | 15 | WBSCR21     | AI923458  | 7q11.23                  |

|             |    |         |           |                |
|-------------|----|---------|-----------|----------------|
| 207628_s_at | 15 | WBSCR22 | NM_017528 | ---            |
| 212606_at   | 15 | WDFY3   | AL536319  | 4q22.1         |
| 200609_s_at | 15 | WDR1    | NM_017491 | 4p16.1         |
| 218512_at   | 15 | WDR12   | NM_018256 | 2q33.3         |
| 220917_s_at | 15 | WDR19   | NM_025132 | 4p14           |
| 201886_at   | 15 | WDR23   | NM_025230 | 14q11.2        |
| 218107_at   | 15 | WDR26   | NM_025160 | 1q42.12-q42.13 |
| 218882_s_at | 14 | WDR3    | NM_006784 | 1p13-p12       |
| 219001_s_at | 12 | WDR32   | NM_024345 | 9p13.1         |
| 218851_s_at | 14 | WDR33   | NM_018383 | 2q21.1         |
| 203536_s_at | 10 | WDR39   | NM_004804 | 2q11.2         |
| 217501_at   | 15 | WDR39   | AI339732  | 2q11.2         |
| 218055_s_at | 15 | WDR41   | NM_018268 | 5q14.1         |
| 202249_s_at | 14 | WDR42A  | AU146233  | 1q22-q23       |
| 202250_s_at | 15 | WDR42A  | NM_015726 | 1q22-q23       |
| 219297_at   | 14 | WDR44   | NM_019045 | Xq24           |
| 209216_at   | 15 | WDR45   | BC000464  | Xp11.23        |
| 209217_s_at | 15 | WDR45   | BC000464  | Xp11.23        |
| 215553_x_at | 14 | WDR45   | AK024315  | ---            |
| 209076_s_at | 15 | WDR45L  | BC000974  | 17q25.3        |
| 203855_at   | 14 | WDR47   | NM_014969 | 1p13.3         |
| 221735_at   | 15 | WDR48   | H04342    | ---            |
| 56919_at    | 14 | WDR48   | AI806628  | 3p22-p21.33    |
| 65591_at    | 12 | WDR48   | N64681    | 3p21.33        |
| 203721_s_at | 15 | WDR50   | NM_016001 | 17q21.33       |
| 219809_at   | 15 | WDR55   | NM_017706 | 5q31.3         |
| 218505_at   | 12 | WDR59   | NM_024673 | 16q22.3        |
| 219538_at   | 15 | WDR5B   | NM_019069 | 3q21.1         |
| 217734_s_at | 15 | WDR6    | NM_018031 | 15q21          |
| 219251_s_at | 10 | WDR60   | NM_018051 | 7q36.3         |
| 212880_at   | 15 | WDR7    | AB011113  | 18q21.1-q22    |
| 219193_at   | 10 | WDR70   | NM_018034 | 5p13.2         |
| 218957_s_at | 15 | WDR71   | NM_025155 | 11q13.3        |
| 221712_s_at | 15 | WDR74   | BC006351  | 11q12.3        |
| 201421_s_at | 15 | WDR77   | NM_024102 | 1p13.2         |
| 40829_at    | 11 | WDTC1   | AB028960  | 1p35.3         |
| 215711_s_at | 14 | WEE1    | AJ277546  | 11p15.3-p15.1  |
| 212533_at   | 15 | Wee1 Hu | X62048    | 11p15.3-p15.1  |
| 203892_at   | 13 | WFDC2   | NM_006103 | 20q12-q13.2    |
| 202908_at   | 15 | WFS1    | NM_006005 | 4p16           |
| 209053_s_at | 11 | WHSC1   | BE793789  | 4p16.3         |
| 209054_s_at | 15 | WHSC1   | AF083389  | 4p16.3         |
| 218173_s_at | 11 | WHSC1L1 | NM_017778 | 8p11.2         |
| 34225_at    | 15 | WHSC2   | AF101434  | 4p16.3         |
| 203827_at   | 15 | WIPI1   | NM_017983 | 17q24.3        |
| 202031_s_at | 15 | WIPI2   | NM_015610 | 7p22.2         |
| 204710_s_at | 15 | WIPI2   | NM_016003 | 7p22.2         |
| 213836_s_at | 15 | WIPI49  | AW052084  | 17q24.3        |
| 212049_at   | 13 | WIRE    | BG230612  | 17q21.2        |
| 212051_at   | 11 | WIRE    | AA676803  | 17q21.2        |

|             |    |                     |           |                     |
|-------------|----|---------------------|-----------|---------------------|
| 212050_at   | 15 | WIRE; WICH          | AK026913  | 17q21.2             |
| 211992_at   | 15 | WNK1                | AI445745  | 12p13.3             |
| 211993_at   | 10 | WNK1                | AI768512  | 12p13.3             |
| 205990_s_at | 13 | WNT5A               | NM_003392 | 3p21-p14            |
| 213425_at   | 10 | WNT5A               | AI968085  | 3p21-p14            |
| 71933_at    | 13 | WNT6                | AI218134  | 2q35                |
| 202749_at   | 15 | WRB                 | NM_004627 | 21q22.3             |
| 201294_s_at | 15 | WSB1                | N24643    | 17q11.2             |
| 201295_s_at | 15 | WSB1                | BF111821  | 17q11.2             |
| 210561_s_at | 15 | WSB1                | AL110243  | 17q11.2             |
| 201760_s_at | 15 | WSB2                | NM_018639 | 12q24.23            |
| 213734_at   | 13 | WSB2                | BG260658  | 12q24.2-q24.3       |
| 206067_s_at | 13 | WT1                 | NM_024426 | 11p13               |
| 203137_at   | 15 | WTAP                | NM_004906 | 6q25-q27            |
| 210285_x_at | 15 | WTAP                | BC000383  | 6q25-q27            |
| 214759_at   | 11 | WTAP                | AL583911  | 6q25-q27            |
| 215794_x_at | 15 | WUGSC:H_DJ0296G17.1 | AC006144  | Xq24-q25            |
| 216508_x_at | 15 | WUGSC:H_NH0244E06.1 | AC007277  | ---                 |
| 217249_x_at | 15 | WUGSC:H_RG162B04.1  | AC004544  | ---                 |
| 219077_s_at | 13 | WWOX                | NM_016373 | 16q23.3-q24.1       |
| 212637_s_at | 14 | WWP1                | AU155187  | 8q21                |
| 212638_s_at | 15 | WWP1                | BF131791  | 8q21                |
| 204022_at   | 10 | WWP2                | AI668780  | 16q22.1             |
| 202132_at   | 14 | WWTR1               | AA081084  | 3q23-q24            |
| 202133_at   | 15 | WWTR1               | NM_015472 | 3q23-q24            |
| 213900_at   | 15 | X123                | AA524029  | 9q13-q21            |
| 209313_at   | 15 | XAB1                | AB044661  | 2p23.3              |
| 216333_x_at | 15 | TNXB1               | M25813    | 6p21.3              |
| 210720_s_at | 15 | XB51                | AB039947  | 20q11.22            |
| 200670_at   | 15 | XBP1                | NM_005080 | 22q12.1             |
| 206698_at   | 14 | XK                  | NM_021083 | Xp21.1              |
| 218753_at   | 15 | XKR8                | NM_018053 | 1p35.2              |
| 211858_x_at | 15 | XL                  | AF088184  | 20q13.2-q13.3       |
| 214548_x_at | 15 | XL                  | AF064092  | 20q13.2-q13.3       |
| 219059_s_at | 14 | XLKD1               | NM_006691 | 11p15               |
| 220037_s_at | 15 | XLKD1               | NM_016164 | 11p15 /// 11p15     |
| 205672_at   | 15 | XPA                 | NM_000380 | 9q22.3              |
| 209375_at   | 14 | XPCC                | D21089    | 3p25                |
| 208619_at   | 15 | XPE                 | L40326    | 11q12-q13           |
| 208453_s_at | 15 | XPNPEP1             | NM_006523 | 10q25.3 /// 10q25.3 |
| 209045_at   | 15 | XPNPEP1             | AF195530  | 10q25.3             |
| 218479_s_at | 15 | XPO4                | NM_022459 | 13q11               |
| 211982_x_at | 15 | XPO6                | AL546600  | 16p12.1             |
| 208459_s_at | 10 | XPO7                | NM_015024 | 8p21                |
| 212166_at   | 11 | XPO7                | H38643    | 8p21                |
| 212160_at   | 15 | XPOT                | AI984005  | 12q14.1             |
| 203655_at   | 15 | XRCC1               | NM_006297 | 19q13.2             |
| 208642_s_at | 15 | XRCC5               | AA205834  | 2q35                |
| 200792_at   | 15 | XRCC6               | NM_001469 | 22q13.2-q13.31      |
| 211946_s_at | 15 | XTP2                | AI359472  | 1q23.3              |

|             |    |         |           |                      |
|-------------|----|---------|-----------|----------------------|
| 211948_x_at | 13 | XTP2    | BG261071  | 1q23.3               |
| 214055_x_at | 15 | XTP2    | AW238632  | 1q23.3               |
| 218069_at   | 15 | XTP3TPA | NM_024096 | 16p12.1              |
| 203712_at   | 15 | XTP5    | NM_014878 | 9p24.2               |
| 206238_s_at | 11 | YAF2    | NM_005748 | 12q12                |
| 213342_at   | 14 | YAP1    | AI745185  | 11q13                |
| 212048_s_at | 15 | YARS    | AW245400  | 1p34.3               |
| 218470_at   | 12 | YARS2   | NM_015936 | 12p11.21             |
| 208628_s_at | 15 | YBX1    | BC002411  | 1p34                 |
| 201844_s_at | 15 | YEAF1   | AB029551  | 3p14.2               |
| 201845_s_at | 15 | YEAF1   | AB029551  | 3p14.2               |
| 221203_s_at | 15 | YEATS2  | NM_018023 | 3q27.3               |
| 218911_at   | 11 | YEATS4  | NM_006530 | 12q13-q15            |
| 202932_at   | 15 | YES1    | NM_005433 | 18p11.31-p11.21      |
| 202933_s_at | 15 | YES1    | NM_005433 | 18p11.31-p11.21      |
| 222180_at   | 10 | YES1    | AU147889  | ---                  |
| 202418_at   | 15 | YIF1A   | NM_020470 | 11q13                |
| 209551_at   | 15 | YIPF4   | BC004875  | 2p23.2               |
| 221423_s_at | 15 | YIPF5   | NM_030799 | 5q32 /// 5q32        |
| 212787_at   | 15 | YLPM1   | AI952986  | 14q24.3              |
| 201351_s_at | 15 | YME1L1  | NM_014263 | 10p14                |
| 201352_at   | 15 | YME1L1  | NM_014263 | 10p14                |
| 213996_at   | 15 | YPEL1   | NM_013313 | 22q11.2              |
| 217783_s_at | 15 | YPEL5   | NM_016061 | 2p23.3               |
| 212455_at   | 15 | YT521   | N36997    | 4q13.3               |
| 214814_at   | 12 | YT521   | BF592058  | 4q13.3               |
| 213077_at   | 15 | YTHDC2  | AL049305  | 5q22.3               |
| 221749_at   | 15 | YTHDF3  | AU157915  | 8q12.2               |
| 208743_s_at | 15 | YWHAB   | BC001359  | 20q13.1              |
| 217717_s_at | 15 | YWHAB   | NM_014052 | 20q13.1              |
| 217718_s_at | 15 | YWHAB   | NM_014052 | 20q13.1              |
| 213655_at   | 15 | YWHAE   | AA502643  | 17p13.3              |
| 201020_at   | 15 | YWHAH   | NM_003405 | 22q12.3              |
| 200693_at   | 15 | YWHAQ   | NM_006826 | 2p25.2-p25.1         |
| 212426_s_at | 15 | YWHAQ   | BF033313  | 2p25.2-p25.1         |
| 213699_s_at | 15 | YWHAQ   | AA854017  | ---                  |
| 200638_s_at | 15 | YWHAZ   | BC003623  | 8q23.1               |
| 200639_s_at | 15 | YWHAZ   | NM_003406 | 8q23.1               |
| 200640_at   | 15 | YWHAZ   | NM_003406 | 8q23.1               |
| 200641_s_at | 15 | YWHAZ   | BC003623  | 8q23.1               |
| 217836_s_at | 15 | YY1AP1  | NM_018253 | 1q22                 |
| 217741_s_at | 15 | ZA20D2  | NM_006007 | 9q13-q21             |
| 216887_s_at | 15 | ZASP    | AJ133768  | 10q22.3-q23.2        |
| 203043_at   | 14 | ZBED1   | NM_004729 | Xp22.33              |
| 213376_at   | 15 | ZBTB1   | AI656706  | 14q23.3              |
| 204847_at   | 15 | ZBTB11  | NM_014415 | 3q12.3               |
| 205883_at   | 14 | ZBTB16  | NM_006006 | 11q23.1              |
| 203602_s_at | 15 | ZBTB17  | NM_003443 | 1p36.2-p36.1         |
| 205383_s_at | 13 | ZBTB20  | NM_015642 | 3q13.2               |
| 214482_at   | 11 | ZBTB25  | NM_006977 | 14q23-q24 /// 14q23- |

|             |    |               |           |              |
|-------------|----|---------------|-----------|--------------|
|             |    |               |           | q24          |
| 205256_at   | 11 | ZBTB39        | NM_014830 | 12q13.2      |
| 203026_at   | 15 | ZBTB5         | NM_014872 | 9p13.1       |
| 205788_s_at | 15 | ZC3H11A       | NM_014827 | 1q32.1       |
| 218348_s_at | 15 | ZC3H7A        | NM_014153 | 16p13-p12    |
| 213051_at   | 12 | ZC3HAV1       | AI133727  | 7q34         |
| 221193_s_at | 15 | ZCCHC10       | NM_017665 | 5q31.1       |
| 212704_at   | 15 | ZCCHC11       | AI049962  | 1p32.3       |
| 219062_s_at | 15 | ZCCHC2        | BE676543  | 18q21.33     |
| 220933_s_at | 13 | ZCCHC6        | NM_024617 | 9q21         |
| 218478_s_at | 15 | ZCCHC8        | NM_017612 | 12q24.31     |
| 212725_s_at | 15 | ZCWCC1        | N37081    | 22q12.2      |
| 216863_s_at | 13 | ZCWCC1        | AC004542  | ---          |
| 213000_at   | 14 | ZCWCC3        | AP000693  | 21q22.13     |
| 219296_at   | 15 | ZDHHC13       | NM_019028 | 11p15.1      |
| 212982_at   | 15 | ZDHHC17       | AI621223  | 12q21.1      |
| 212860_at   | 10 | ZDHHC18       | BG168720  | 1p35.3       |
| 218077_s_at | 13 | ZDHHC3        | NM_016598 | 3p21.32      |
| 218078_s_at | 15 | ZDHHC3        | NM_016598 | 3p21.32      |
| 220261_s_at | 15 | ZDHHC4        | NM_018106 | 7p22.2       |
| 218249_at   | 15 | ZDHHC6        | NM_022494 | 10q25.3      |
| 218606_at   | 15 | ZDHHC7        | NM_017740 | 16q24.1      |
| 202978_s_at | 11 | ZF            | NM_021212 | 11q14        |
| 202979_s_at | 15 | ZF            | NM_021212 | 11q14        |
| 218919_at   | 15 | ZFAND1        | NM_024699 | 8q21.13      |
| 218020_s_at | 15 | ZFAND3        | NM_021943 | 6pter-p22.3  |
| 211485_s_at | 14 | ZFGF5; FGF-18 | AF211188  | 5q34         |
| 203603_s_at | 15 | ZFHX1B        | NM_014795 | 2q22         |
| 211257_x_at | 15 | ZFML          | AF273049  | 2p13.2-p13.1 |
| 217781_s_at | 15 | ZFP106        | AI493587  | 15q14        |
| 201531_at   | 15 | ZFP36         | NM_003407 | 19q13.1      |
| 211962_s_at | 15 | ZFP36L1       | BG250310  | 14q22-q24    |
| 211965_at   | 15 | ZFP36L1       | BE620915  | 14q22-q24    |
| 201368_at   | 15 | ZFP36L2       | AI356398  | ---          |
| 201369_s_at | 15 | ZFP36L2       | NM_006887 | 2p22.3-p21   |
| 218968_s_at | 15 | ZFP64         | NM_018197 | 20q13.13     |
| 203731_s_at | 11 | ZFP95         | NM_014569 | 7q22         |
| 209428_s_at | 10 | ZFPL1         | BG420865  | 11q13        |
| 219778_at   | 15 | ZFPM2         | NM_012082 | 8q23         |
| 201856_s_at | 15 | ZFR           | BC000376  | 5p13.3       |
| 201857_at   | 15 | ZFR           | NM_016107 | 5p13.3       |
| 203651_at   | 15 | ZFYVE16       | NM_014733 | 5p15.2-q14.3 |
| 219929_s_at | 14 | ZFYVE21       | NM_024071 | 14q32.33     |
| 213073_at   | 13 | ZFYVE26       | AB002319  | 14q24.1      |
| 37943_at    | 14 | ZFYVE26       | AB002319  | 14q24.1      |
| 204893_s_at | 10 | ZFYVE9        | NM_004799 | 1p32.3       |
| 57539_at    | 15 | ZGPAT         | AA535065  | 20q13.3      |
| 203556_at   | 15 | ZHX2          | NM_014943 | 8q24.13      |
| 202939_at   | 15 | ZMPSTE24      | NM_005857 | 1p34         |
| 220206_at   | 11 | ZMYM1         | NM_024772 | 1p34.3       |

|             |    |         |           |                   |
|-------------|----|---------|-----------|-------------------|
| 207559_s_at | 15 | ZMYM3   | NM_005096 | Xq13.1            |
| 202049_s_at | 15 | ZMYM4   | NM_005095 | 1p32-p34          |
| 202051_s_at | 15 | ZMYM4   | NM_005095 | 1p32-p34          |
| 219924_s_at | 12 | ZMYM6   | NM_007167 | 1p34.2            |
| 202136_at   | 15 | ZMYND11 | BE250417  | 10p14             |
| 202137_s_at | 12 | ZMYND11 | NM_006624 | 10p14             |
| 212798_s_at | 15 | ZMYND20 | AK001389  | 7p21              |
| 207605_x_at | 10 | ZNF117  | NM_024498 | 7q11.21           |
| 219571_s_at | 15 | ZNF12   | NM_016265 | 7p22.2            |
| 221842_s_at | 15 | ZNF131  | BE972394  | 5p12-p11          |
| 216960_s_at | 15 | ZNF133  | AL049646  | ---               |
| 37254_at    | 15 | ZNF133  | U09366    | 20p11.23-20p11.22 |
| 206182_at   | 13 | ZNF134  | NM_003435 | 19q13.4           |
| 206240_s_at | 15 | ZNF136  | NM_003437 | 19p13.2-p13.12    |
| 207394_at   | 12 | ZNF137  | NM_003438 | 19q13.4           |
| 219854_at   | 11 | ZNF14   | NM_021030 | 19p13.3-p13.2     |
| 204523_at   | 14 | ZNF140  | NM_003440 | 12q24.32-q24.33   |
| 221873_at   | 13 | ZNF143  | AW162015  | 11p15.4           |
| 200050_at   | 15 | ZNF146  | NM_007145 | 19q13.1           |
| 203318_s_at | 14 | ZNF148  | NM_021964 | 3q21              |
| 219548_at   | 13 | ZNF16   | NM_006958 | 8q24              |
| 202171_at   | 15 | ZNF161  | AU146275  | 17q23.2           |
| 202172_at   | 15 | ZNF161  | BG035116  | 17q23.2           |
| 202173_s_at | 15 | ZNF161  | NM_007146 | 17q23.2           |
| 206314_at   | 14 | ZNF167  | NM_018651 | 3p22.3-p21.1      |
| 210290_at   | 12 | ZNF174  | BC001161  | 16p13.3           |
| 207417_s_at | 15 | ZNF177  | NM_003451 | 19p13.2           |
| 203585_at   | 15 | ZNF185  | NM_007150 | Xq28              |
| 213218_at   | 13 | ZNF187  | AV705032  | 6p21.31           |
| 207513_s_at | 15 | ZNF189  | NM_003452 | 9q22-q31          |
| 205181_at   | 14 | ZNF193  | NM_006299 | 6p21.3            |
| 204234_s_at | 15 | ZNF195  | AI476267  | 11p15.5           |
| 205855_at   | 15 | ZNF197  | NM_006991 | 3p21              |
| 202778_s_at | 15 | ZNF198  | NM_003453 | 13q11-q12         |
| 210282_at   | 10 | ZNF198  | AL136621  | 13q11-q12         |
| 213916_at   | 10 | ZNF20   | AU154474  | 19p13.3-p13.2     |
| 214706_at   | 14 | ZNF200  | AU149447  | 16p13.3           |
| 204327_s_at | 14 | ZNF202  | NM_003455 | 11q23.3           |
| 200828_s_at | 15 | ZNF207  | NM_003457 | 17q12             |
| 200829_x_at | 15 | ZNF207  | NM_003457 | 17q12             |
| 205437_at   | 13 | ZNF211  | NM_006385 | 19q13.4           |
| 203985_at   | 15 | ZNF212  | NM_012256 | 7q36.1            |
| 210275_s_at | 15 | ZNF216  | AF062347  | 9q13-q21          |
| 203739_at   | 12 | ZNF217  | NM_006526 | 20q13.2           |
| 219314_s_at | 14 | ZNF219  | NM_016423 | 14q11             |
| 218005_at   | 15 | ZNF22   | AA744771  | 10q11             |
| 218006_s_at | 15 | ZNF22   | AA744771  | 10q11             |
| 207128_s_at | 14 | ZNF223  | NM_013361 | 19q13.2           |
| 219603_s_at | 15 | ZNF226  | NM_015919 | 19q13.2           |
| 222237_s_at | 14 | ZNF228  | AC084239  | ---               |

|             |    |         |           |                   |
|-------------|----|---------|-----------|-------------------|
| 213934_s_at | 10 | ZNF23   | AL567808  | 16q22             |
| 219123_at   | 15 | ZNF232  | NM_014519 | 17p13-p12         |
| 47571_at    | 13 | ZNF236  | AA004757  | 18q22-q23         |
| 215948_x_at | 13 | ZNF237  | AI522311  | 13q12             |
| 203247_s_at | 13 | ZNF24   | BC003566  | 18q12             |
| 212534_at   | 15 | ZNF24   | AU144066  | 18q12             |
| 213269_at   | 15 | ZNF248  | N21541    | ---               |
| 206900_x_at | 14 | ZNF253  | NM_021047 | 19p13.11          |
| 213698_at   | 15 | ZNF258  | AI805560  | 1p34.3            |
| 200054_at   | 14 | ZNF259  | NM_003904 | 11q23.3           |
| 217185_s_at | 10 | ZNF259  | Z95118    | ---               |
| 202050_s_at | 15 | ZNF262  | AI650586  | 1p32-p34          |
| 203707_at   | 15 | ZNF263  | NM_005741 | 16p13.3           |
| 205917_at   | 14 | ZNF264  | NM_003417 | 19q13.4           |
| 214686_at   | 15 | ZNF266  | AA868898  | ---               |
| 219540_at   | 11 | ZNF267  | NM_003414 | 16p11.2           |
| 215239_x_at | 14 | ZNF273  | AU132789  | 7q11.21           |
| 204937_s_at | 15 | ZNF274  | NM_016325 | 19qter            |
| 218645_at   | 13 | ZNF277  | NM_021994 | 7q31.1            |
| 209494_s_at | 14 | ZNF278  | AI807017  | 22q12.2           |
| 218401_s_at | 15 | ZNF281  | AU150752  | 1q32.1 /// 1q32.1 |
| 211975_at   | 15 | ZNF289  | BE299671  | 11p11.2-p11.12    |
| 215848_at   | 10 | ZNF291  | AW139369  | 15q24             |
| 212366_at   | 15 | ZNF292  | BF223237  | 6q15              |
| 212368_at   | 15 | ZNF292  | AA972711  | 6q15              |
| 215596_s_at | 15 | ZNF294  | AL163248  | 21q22.11          |
| 213081_at   | 12 | ZNF297  | AL523144  | 6p21.3            |
| 204180_s_at | 14 | ZNF297B | NM_014007 | 9p24.1-q22.33     |
| 204181_s_at | 14 | ZNF297B | T90308    | 9p24.1-q22.33     |
| 204182_s_at | 13 | ZNF297B | NM_014007 | 9p24.1-q22.33     |
| 218490_s_at | 15 | ZNF302  | NM_018443 | 19q13.12          |
| 207753_at   | 12 | ZNF304  | NM_020657 | 19q13.4           |
| 200867_at   | 15 | ZNF313  | AL031685  | 20q13.13          |
| 200868_s_at | 15 | ZNF313  | NM_018683 | 20q13.13          |
| 203521_s_at | 14 | ZNF318  | NM_014345 | 6pter-p12.1       |
| 219376_at   | 15 | ZNF322A | NM_024639 | 6p22.1            |
| 222016_s_at | 15 | ZNF323  | AW086021  | ---               |
| 219765_at   | 12 | ZNF329  | NM_024620 | 19q13.43          |
| 209814_at   | 15 | ZNF330  | BC004421  | ---               |
| 219228_at   | 15 | ZNF331  | NM_018555 | 19q13.3-q13.4     |
| 78330_at    | 10 | ZNF335  | AA845577  | 20q11.21-q13.12   |
| 214760_at   | 10 | ZNF337  | AL049942  | 20p11.21          |
| 37860_at    | 15 | ZNF337  | AL049942  | 20p11.21          |
| 219801_at   | 15 | ZNF34   | NM_030580 | 8q24.3            |
| 206096_at   | 12 | ZNF35   | AI809774  | 3p22-p21          |
| 217715_x_at | 15 | ZNF354A | BE045142  | ---               |
| 219379_x_at | 10 | ZNF358  | NM_018083 | ---               |
| 214670_at   | 15 | ZNF36   | AA653300  | 7q21.3-q22.1      |
| 212742_at   | 15 | ZNF364  | AL530462  | 1q21.2            |
| 212369_at   | 12 | ZNF384  | AI264312  | ---               |

|             |    |        |           |                          |
|-------------|----|--------|-----------|--------------------------|
| 218149_s_at | 15 | ZNF395 | NM_017606 | 8p21.1                   |
| 221123_x_at | 12 | ZNF395 | NM_018660 | 8p21.1                   |
| 221646_s_at | 15 | ZNF399 | AF267859  | 5p15.33                  |
| 218079_s_at | 15 | ZNF403 | NM_024835 | 17q21.1                  |
| 202010_s_at | 15 | ZNF410 | NM_021188 | 14q24.3                  |
| 205514_at   | 15 | ZNF415 | NM_018355 | 19q13.42                 |
| 58367_s_at  | 15 | ZNF419 | AA429615  | 19q13.43                 |
| 40569_at    | 15 | ZNF42  | M58297    | ---                      |
| 214761_at   | 15 | ZNF423 | AW149417  | 16q12                    |
| 206695_x_at | 14 | ZNF43  | NM_003423 | 19p13.1-p12              |
| 206829_x_at | 13 | ZNF430 | NM_025189 | 19p13.11                 |
| 219848_s_at | 11 | ZNF432 | NM_014650 | 19q13.41                 |
| 218937_at   | 14 | ZNF434 | NM_017810 | 16p13.3                  |
| 215359_x_at | 15 | ZNF44  | AI758888  | 19p13.2                  |
| 205928_at   | 13 | ZNF443 | NM_005815 | 19p13.2                  |
| 50376_at    | 14 | ZNF444 | AI278629  | 19q13.43                 |
| 218312_s_at | 15 | ZNF447 | NM_023926 | 19q13.43                 |
| 222028_at   | 15 | ZNF45  | AI967981  | 19q13.2                  |
| 212557_at   | 15 | ZNF451 | AB011148  | 6p12.1                   |
| 215012_at   | 11 | ZNF451 | AU144775  | 6p12.1                   |
| 214746_s_at | 15 | ZNF467 | BE549732  | 7q36.1                   |
| 208119_s_at | 14 | ZNF505 | NM_031218 | 19p13.11 ///<br>19p13.11 |
| 206053_at   | 11 | ZNF510 | NM_014930 | 9q22.33                  |
| 203604_at   | 14 | ZNF516 | N38750    | ---                      |
| 204291_at   | 14 | ZNF518 | NM_014803 | 10q24.1                  |
| 215307_at   | 15 | ZNF529 | AL109722  | ---                      |
| 220617_s_at | 15 | ZNF532 | NM_018181 | 18q21.32                 |
| 218735_s_at | 15 | ZNF544 | NM_014480 | 19q13.43                 |
| 219163_at   | 14 | ZNF562 | NM_017656 | 19p13.2                  |
| 206648_at   | 12 | ZNF571 | NM_016536 | 19q13.13                 |
| 217627_at   | 13 | ZNF573 | BE515346  | 19q13.13                 |
| 219089_s_at | 15 | ZNF576 | NM_024327 | 19q13.32                 |
| 220748_s_at | 14 | ZNF580 | NM_016202 | 19q13.43                 |
| 219711_at   | 11 | ZNF586 | NM_017652 | 19q13.43                 |
| 219981_x_at | 15 | ZNF587 | NM_017961 | ---                      |
| 204473_s_at | 14 | ZNF592 | NM_014630 | 15q25.2                  |
| 204175_at   | 15 | ZNF593 | NM_015871 | 1p35.3                   |
| 219635_at   | 15 | ZNF606 | NM_025027 | 19q13.4                  |
| 208137_x_at | 10 | ZNF611 | NM_030972 | 19q13.42 ///<br>19q13.42 |
| 220721_at   | 14 | ZNF614 | NM_025040 | 19q13.41                 |
| 213196_at   | 12 | ZNF629 | AI924293  | ---                      |
| 213775_x_at | 15 | ZNF638 | AI357871  | 2p13.2-p13.1             |
| 220760_x_at | 15 | ZNF665 | NM_024733 | 19q13.42                 |
| 218068_s_at | 15 | ZNF672 | NM_024836 | 1q44                     |
| 206583_at   | 15 | ZNF673 | NM_017776 | Xp11.3                   |
| 220661_s_at | 15 | ZNF692 | NM_017865 | 1q44                     |
| 205089_at   | 15 | ZNF7   | NM_003416 | 8q24                     |
| 218059_at   | 15 | ZNF706 | NM_016096 | 8q22.3                   |



|             |    |        |           |             |
|-------------|----|--------|-----------|-------------|
| 213659_at   | 14 | ZNF75  | AA209420  | Xq26.3      |
| 214813_at   | 13 | ZNF75  | W90796    | Xq26.3      |
| 204453_at   | 15 | ZNF84  | NM_003428 | 12q24.33    |
| 206158_s_at | 15 | ZNF9   | NM_003418 | 3q21        |
| 206059_at   | 13 | ZNF91  | NM_003430 | 19p13.1-p12 |
| 201541_s_at | 15 | ZNHIT1 | NM_006349 | 7q22.1      |
| 213097_s_at | 15 | ZRF1   | AI338837  | 7q22-q32    |
| 209431_s_at | 12 | ZSG    | AF254083  | 22q12.2     |
| 204812_at   | 12 | ZW10   | NM_004724 | 11q23.3     |
| 204026_s_at | 15 | ZWINT  | NM_007057 | 10q21-q22   |
| 202448_s_at | 12 | ZYG    | BE675849  | 9q34.13     |
| 200808_s_at | 15 | ZYX    | NM_003461 | 7q32        |
| 215706_x_at | 15 | ZYX    | BC002323  | 7q32        |
