# Supplementary material for: Altered expression of mitochondrial and extracellular matrix genes in the heart of human fetuses with chromosome 21 trisomy
Source: PubMed Central journal article supplement (PMC1964766; doi:10.1186/1471-2164-8-268), 2007-08-07
Supplement: 1471-2164-8-268-S2.pdf [file 1471-2164-8-268-S2.pdf]

**Table S2. Hsa21 genes expressed in the human fetal heart at 18-22 weeks of gestation.** Genes (probe sets) are sorted according to chromosomal location. Mitochondrial and ECM genes are in bold.

| Probe ID    | Gene Name      | GenBank ID | Presence Call | Fold Change | p-value | Chromosomal localization |
|-------------|----------------|------------|---------------|-------------|---------|--------------------------|
| 220330_s_at | SAMSN1         | NM_022136  | 14            | 2.296       | 0.05930 | 21q11                    |
| 202557_at   | STCH           | AI718418   | 15            | 2.011       | 0.05780 | 21q11.1                  |
| 202558_s_at | STCH           | NM_006948  | 14            | 1.564       | 0.05900 | 21q11.1                  |
| 202599_s_at | NRIP1          | NM_003489  | 15            | 1.451       | 0.14800 | 21q11.2                  |
| 202600_s_at | NRIP1          | AI824012   | 13            | 2.188       | 0.20700 | 21q11.2                  |
| 220419_s_at | USP25          | NM_013396  | 15            | 1.511       | 0.05530 | 21q11.2                  |
| 202325_s_at | <b>ATP5J</b>   | NM_001685  | 15            | 1.003       | 0.97100 | 21q21.1                  |
| 213134_x_at | BTG3           | AI765445   | 15            | 1.595       | 0.01340 | 21q21.1                  |
| 205548_s_at | BTG3           | NM_006806  | 15            | 1.685       | 0.00788 | 21q21.1                  |
| 215425_at   | BTG3           | AL049332   | 14            | 1.236       | 0.39400 | 21q21.1                  |
| 220941_s_at | C21orf91       | NM_017447  | 10            | 1.343       | 0.13900 | 21q21.1                  |
| 203917_at   | CXADR          | NM_001338  | 15            | 1.039       | 0.86900 | 21q21.1                  |
| 205669_at   | NCAM2          | NM_004540  | 11            | 1.24        | 0.34800 | 21q21.1                  |
| 222162_s_at | <b>ADAMTS1</b> | AK023795   | 15            | 1.93        | 0.01350 | 21q21.2                  |
| 214953_s_at | <b>APP</b>     | X06989     | 15            | 1.668       | 0.05310 | 21q21.2                  |
| 211277_x_at | <b>APP</b>     | BC004369   | 15            | 1.166       | 0.29500 | 21q21.2                  |
| 200602_at   | <b>APP</b>     | NM_000484  | 15            | 1.479       | 0.20400 | 21q21.2                  |
| 219213_at   | JAM2           | NM_021219  | 15            | 1.939       | 0.00165 | 21q21.2                  |
| 220311_at   | C21orf127      | NM_013240  | 12            | 1.358       | 0.18900 | 21q21.3                  |
| 221158_at   | C21orf66       | NM_013329  | 15            | 1.277       | 0.00464 | 21q21.3                  |
| 218515_at   | C21orf66       | NM_016631  | 15            | 1.289       | 0.08500 | 21q21.3                  |
| 219767_s_at | CRYZL1         | NM_005111  | 15            | 1.512       | 0.00074 | 21q21.3                  |
| 219935_at   | HEMK2          | NM_007038  | 15            | 1.5         | 0.02970 | 21q21.3                  |
| 218558_s_at | <b>MRPL39</b>  | NM_017446  | 15            | 1.318       | 0.04160 | 21q21.3                  |
| 218123_at   | C21orf59       | NM_017835  | 15            | 1.242       | 0.24100 | 21q22.1                  |
| 221677_s_at | DONSON         | AF232674   | 15            | 1.2         | 0.07860 | 21q22.1                  |
| 212378_at   | GART           | NM_000819  | 15            | 1.279       | 0.08630 | 21q22.1                  |
| 210005_at   | GART           | D32051     | 12            | 0.847       | 0.24400 | 21q22.1                  |
| 204786_s_at | IFNAR2         | L41944     | 10            | 2.263       | 0.21400 | 21q22.1                  |
| 200642_at   | SOD1           | NM_000454  | 15            | 1.163       | 0.14500 | 21q22.1                  |
| 213135_at   | TIAM1          | U90902     | 14            | 1.968       | 0.04440 | 21q22.1                  |
| 216954_x_at | <b>ATP5O</b>   | S77356     | 15            | 1.344       | 0.07020 | 21q22.11                 |
| 200818_at   | <b>ATP5O</b>   | NM_001697  | 15            | 1.03        | 0.68300 | 21q22.11                 |
| 204194_at   | BACH1          | NM_001186  | 15            | 1.524       | 0.16100 | 21q22.11                 |
| 212996_s_at | C21orf108      | AI803485   | 11            | 1.169       | 0.43900 | 21q22.11                 |
| 219004_s_at | C21orf45       | NM_018944  | 15            | 1.227       | 0.30800 | 21q22.11                 |
| 200873_s_at | CCT8           | NM_006585  | 15            | 1.347       | 0.14900 | 21q22.11                 |
| 201642_at   | IFNGR2         | NM_005534  | 15            | 1.476       | 0.00623 | 21q22.11                 |
| 209575_at   | IL10RB         | BC001903   | 15            | 1.332       | 0.00233 | 21q22.11                 |
| 209298_s_at | ITSN1          | AF114488   | 13            | 1.535       | 0.13200 | 21q22.11                 |
| 209297_at   | ITSN1          | AF114488   | 11            | 1.625       | 0.10500 | 21q22.11                 |
| 35776_at    | ITSN1          | AF064243   | 15            | 1.722       | 0.00033 | 21q22.11                 |
| 213164_at   | <b>MRPS6</b>   | AI867198   | 15            | 1.127       | 0.56600 | 21q22.11                 |
| 212944_at   | <b>MRPS6</b>   | AK024896   | 15            | 1.663       | 0.21800 | 21q22.11                 |
| 214988_s_at | SON            | X63071     | 15            | 1.462       | 0.01210 | 21q22.11                 |
| 213538_at   | SON            | AI936458   | 15            | 1.367       | 0.03200 | 21q22.11                 |
| 201086_x_at | SON            | NM_003103  | 15            | 1.423       | 0.03650 | 21q22.11                 |
| 219600_s_at | TMEM50B        | BC000569   | 15            | 1.25        | 0.11400 | 21q22.11                 |
| 218386_x_at | USP16          | AI806796   | 15            | 1.454       | 0.04300 | 21q22.11                 |
| 215596_s_at | ZNF294         | AL163248   | 15            | 1.328       | 0.16000 | 21q22.11                 |
| 208370_s_at | DSCR1          | NM_004414  | 15            | 1.245       | 0.49600 | 21q22.12                 |
| 208514_at   | KCNE1          | NM_000219  | 12            | 1.224       | 0.14600 | 21q22.12                 |
| 209033_s_at | DYRK1A         | D86550     | 15            | 1.528       | 0.00454 | 21q22.13                 |
| 213000_at   | MORK3          | AP000693   | 14            | 1.494       | 0.11000 | 21q22.13                 |
| 213989_x_at | SETD4          | AB004853   | 10            | 2.472       | 0.19500 | 21q22.13                 |
| 203635_at   | DSCR3          | NM_006052  | 15            | 0.978       | 0.89300 | 21q22.2                  |

|             |                |           |    |       |         |         |
|-------------|----------------|-----------|----|-------|---------|---------|
| 205549_at   | PCP4           | NM_006198 | 15 | 1.195 | 0.38400 | 21q22.2 |
| 221689_s_at | PIGP           | AB035745  | 15 | 1.475 | 0.00037 | 21q22.2 |
| 217269_s_at | PRSS7          | AP001672  | 11 | 1.008 | 0.97300 | 21q22.2 |
| 212990_at   | SINJ1          | AB020717  | 15 | 1.147 | 0.28500 | 21q22.2 |
| 208662_s_at | TTC3           | AI885338  | 15 | 1.541 | 0.01890 | 21q22.2 |
| 208661_s_at | TTC3           | D84294    | 15 | 2.969 | 0.03570 | 21q22.2 |
| 208073_x_at | TTC3           | NM_003316 | 15 | 1.635 | 0.00780 | 21q22.2 |
| 208663_s_at | TTC3           | AI652848  | 14 | 2.754 | 0.06680 | 21q22.2 |
| 204567_s_at | ABCG1          | NM_004915 | 15 | 1.613 | 0.06180 | 21q22.3 |
| 211113_s_at | ABCG1          | U34919    | 14 | 1.503 | 0.01900 | 21q22.3 |
| 203865_s_at | ADARB1         | NM_015833 | 11 | 1.541 | 0.01100 | 21q22.3 |
| 217867_x_at | BACE2          | AF178532  | 15 | 1.61  | 0.02880 | 21q22.3 |
| 212875_s_at | C21orf25       | AP001745  | 11 | 1.282 | 0.33000 | 21q22.3 |
| 212816_s_at | CBS            | BE613178  | 12 | 1.01  | 0.96000 | 21q22.3 |
| 209082_s_at | <b>COL18A1</b> | AF018081  | 15 | 1.406 | 0.06460 | 21q22.3 |
| 209081_s_at | <b>COL18A1</b> | AF018081  | 15 | 1.57  | 0.00786 | 21q22.3 |
| 213428_s_at | <b>COL6A1</b>  | AA292373  | 15 | 1.618 | 0.00371 | 21q22.3 |
| 212091_s_at | <b>COL6A1</b>  | AI141603  | 10 | 1.927 | 0.04930 | 21q22.3 |
| 213290_at   | <b>COL6A2</b>  | AL531750  | 15 | 1.443 | 0.03480 | 21q22.3 |
| 209156_s_at | <b>COL6A2</b>  | AY029208  | 15 | 2.391 | 0.00022 | 21q22.3 |
| 201201_at   | CSTB           | NM_000100 | 15 | 1.174 | 0.22900 | 21q22.3 |
| 215529_x_at | DIP2A          | AI590053  | 12 | 1.29  | 0.53500 | 21q22.3 |
| 203405_at   | DSCR2          | NM_003720 | 15 | 1.15  | 0.35600 | 21q22.3 |
| 213541_s_at | ERG            | AI351043  | 15 | 1.405 | 0.03210 | 21q22.3 |
| 201329_s_at | ETS2           | NM_005239 | 15 | 1.089 | 0.45300 | 21q22.3 |
| 201328_at   | ETS2           | AL575509  | 15 | 1.563 | 0.11100 | 21q22.3 |
| 222303_at   | ETS2           | AV700891  | 14 | 1.571 | 0.09150 | 21q22.3 |
| 200944_s_at | HMG1           | NM_004965 | 15 | 1.347 | 0.00173 | 21q22.3 |
| 200943_at   | HMG1           | NM_004965 | 15 | 1.558 | 0.00851 | 21q22.3 |
| 221564_at   | HRMT1L1        | AL570294  | 15 | 1.496 | 0.00233 | 21q22.3 |
| 202098_s_at | HRMT1L1        | NM_001535 | 15 | 1.177 | 0.23900 | 21q22.3 |
| 208579_x_at | HSF2BP         | NM_017445 | 13 | 1.642 | 0.00717 | 21q22.3 |
| 202803_s_at | <b>ITGB2</b>   | NM_000211 | 13 | 1.052 | 0.59700 | 21q22.3 |
| 212846_at   | KIAA0179       | AA811192  | 14 | 1.428 | 0.01200 | 21q22.3 |
| 202217_at   | <b>KNP-I</b>   | NM_004649 | 15 | 1.407 | 0.18600 | 21q22.3 |
| 210667_s_at | <b>KNP-I</b>   | D86062    | 15 | 1.086 | 0.79200 | 21q22.3 |
| 202245_at   | LSS            | AW084510  | 15 | 1.205 | 0.16700 | 21q22.3 |
| 212269_s_at | MCM3AP         | AJ010089  | 15 | 1.369 | 0.06630 | 21q22.3 |
| 220459_at   | MCM3APAS       | NM_018118 | 14 | 0.874 | 0.41100 | 21q22.3 |
| 202086_at   | MX1            | NM_002462 | 12 | 1.04  | 0.91300 | 21q22.3 |
| 204994_at   | MX2            | NM_002463 | 15 | 0.84  | 0.30500 | 21q22.3 |
| 218019_s_at | PDXK           | AW449022  | 15 | 1.119 | 0.49400 | 21q22.3 |
| 218018_at   | PDXK           | AW449022  | 15 | 0.758 | 0.52200 | 21q22.3 |
| 201102_s_at | PFKL           | NM_002626 | 15 | 1.2   | 0.05060 | 21q22.3 |
| 211065_x_at | PFKL           | BC006422  | 15 | 1.419 | 0.00882 | 21q22.3 |
| 54051_at    | PKNOX1         | H59033    | 13 | 1.201 | 0.20800 | 21q22.3 |
| 221883_at   | PKNOX1         | AA133342  | 12 | 1.321 | 0.22400 | 21q22.3 |
| 209578_s_at | POFUT2         | BC000626  | 15 | 1.231 | 0.06320 | 21q22.3 |
| 200677_at   | PTTG1IP        | NM_004339 | 15 | 1.224 | 0.11300 | 21q22.3 |
| 204979_s_at | SH3BGR         | NM_007341 | 15 | 1.278 | 0.22200 | 21q22.3 |
| 200740_s_at | SUMO3          | BG338532  | 15 | 1.357 | 0.01830 | 21q22.3 |
| 200739_s_at | SUMO3          | BG338532  | 15 | 1.215 | 0.33900 | 21q22.3 |
| 204623_at   | TFF3           | NM_003226 | 14 | 1.609 | 0.06070 | 21q22.3 |
| 202858_at   | U2AF1          | NM_006758 | 15 | 1.253 | 0.28100 | 21q22.3 |
| 209042_s_at | UBE2G2         | BC001738  | 15 | 1.191 | 0.43400 | 21q22.3 |
| 209041_s_at | UBE2G2         | BG395660  | 11 | 1.444 | 0.22100 | 21q22.3 |
| 202749_at   | WRB            | NM_004627 | 15 | 1.175 | 0.27900 | 21q22.3 |
