# Supplementary material for: Altered expression of mitochondrial and extracellular matrix genes in the heart of human fetuses with chromosome 21 trisomy
Source: PubMed Central journal article supplement (PMC1964766; doi:10.1186/1471-2164-8-268), 2007-08-07

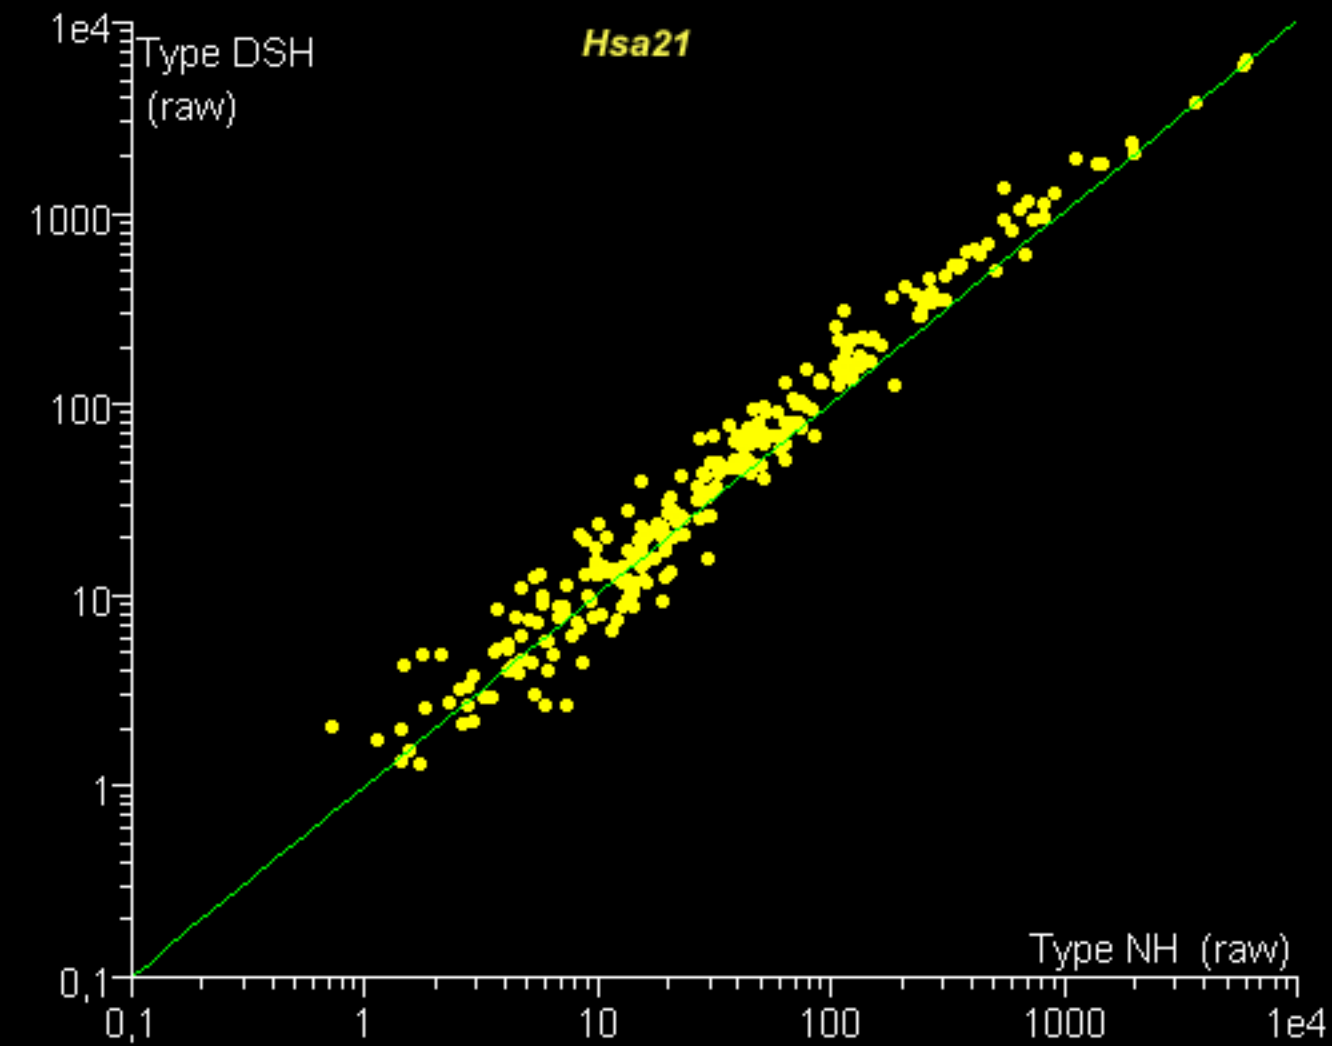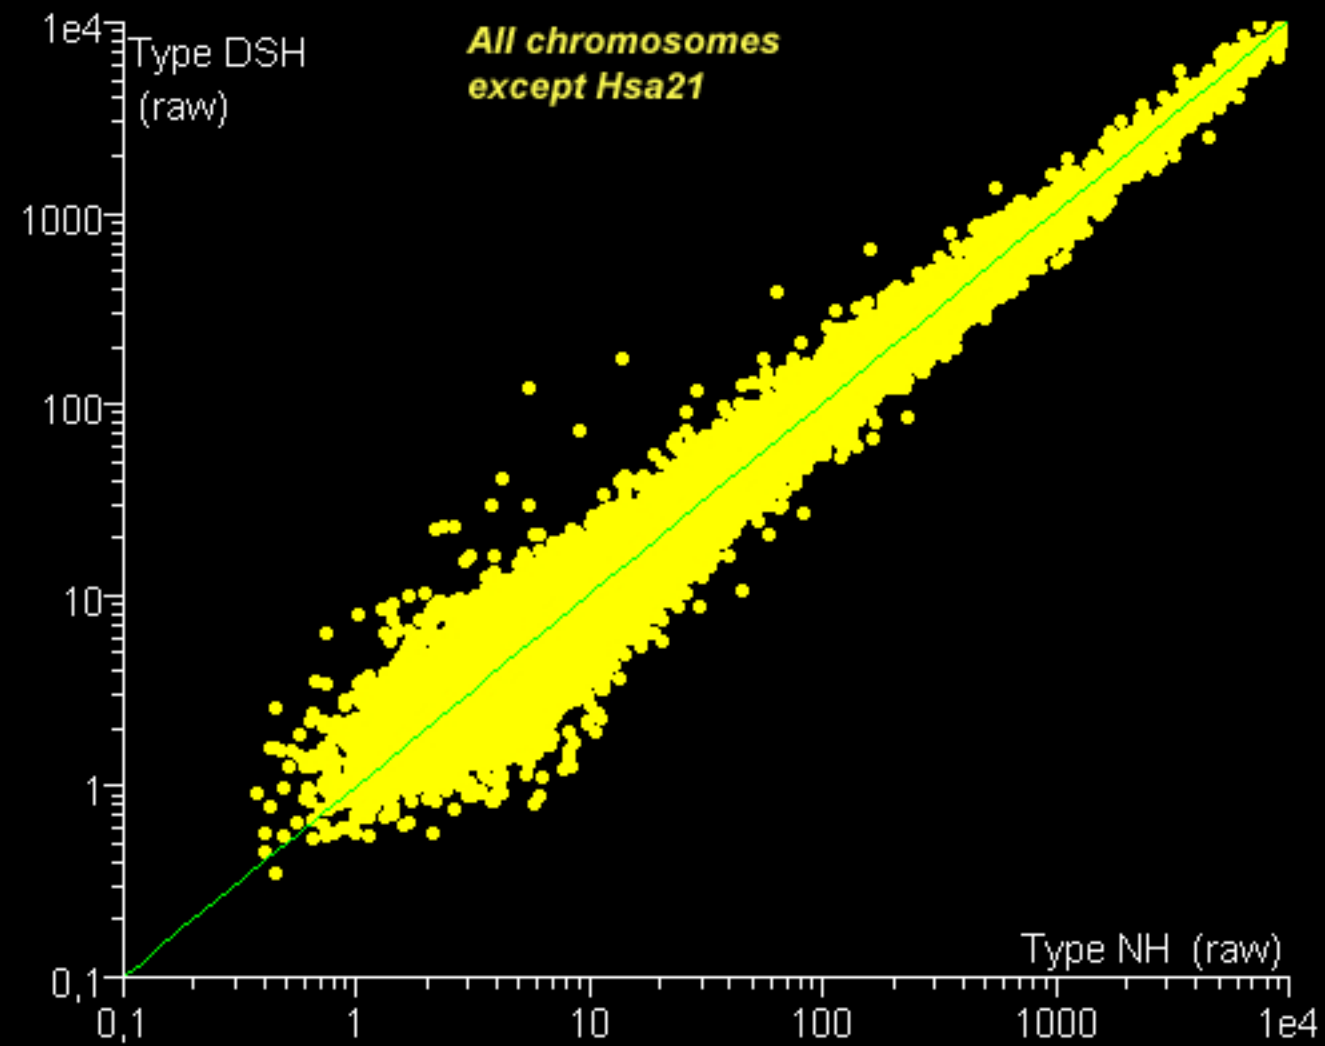

Supplement: 1471-2164-8-268-S3.pdf [file 1471-2164-8-268-S3.pdf]
