# Supplementary material for: Altered expression of mitochondrial and extracellular matrix genes in the heart of human fetuses with chromosome 21 trisomy
Source: PubMed Central journal article supplement (PMC1964766; doi:10.1186/1471-2164-8-268), 2007-08-07
Supplement: 1471-2164-8-268-S4.pdf [file 1471-2164-8-268-S4.pdf]

**Table S3. Genes differentially expressed between trisomic and control samples.**

The table includes genes with fold change  $> |1.2|$  and  $p < 0.05$  (ANOVA test). Genes are sorted according to fold change,

| Probe ID    | Gene Name | GenBank ID | Fold Change | p-value | Chromosomal location |
|-------------|-----------|------------|-------------|---------|----------------------|
| 211560_s_at | ALAS2     | AF130113   | 2.901       | 0.0445  | Xp11.21              |
| 221795_at   | NTRK2     | AA707199   | 2.854       | 0.0283  | 9q22.1               |
| 222106_at   | PRND      | AL133396   | 2.831       | 0.0042  | 20pter-p12           |
| 205608_s_at | ANGPT1    | U83508     | 2.467       | 0.004   | 8q22.3-q23           |
| 222288_at   | PPP4R2    | AI004009   | 2.44        | 0.0516  | 3p13                 |
| 209535_s_at | AKAP13    | AF127481   | 2.405       | 0.0153  | 15q24-q25            |
| 209156_s_at | COL6A2    | AY029208   | 2.391       | 0.0002  | 21q22.3              |
| 204606_at   | CCL21     | NM_002989  | 2.263       | 0.0057  | 9p13                 |
| 201668_x_at | MARCKS    | AW163148   | 2.182       | 0.0162  | 6q22.2               |
| 201497_x_at | MYH11     | NM_022844  | 2.168       | 0.0054  | 16p13.13-p13.12      |
| 205593_s_at | PDE9A     | NM_002606  | 2.052       | 0.0067  | 21q22.3              |
| 201830_s_at | NET1      | NM_005863  | 1.985       | 0.0435  | 10p15                |
| 205923_at   | RELN      | NM_005045  | 1.97        | 0.0029  | 7q22                 |
| 213135_at   | TIAM1     | U90902     | 1.968       | 0.0444  | 21q22.1              |
| 214433_s_at | SELENBP1  | NM_003944  | 1.965       | 0.0089  | 1q21-q22             |
| 212385_at   | TCF4      | AU118026   | 1.951       | 0.0481  | 18q21.1              |
| 217525_at   | OLFML1    | AW305097   | 1.942       | 0.0072  | 11p15.4              |
| 219213_at   | JAM2      | NM_021219  | 1.939       | 0.0017  | 21q21.2              |
| 222162_s_at | ADAMTS1   | AK023795   | 1.93        | 0.0135  | 21q21.2              |
| 212091_s_at | COL6A1    | AI141603   | 1.927       | 0.0493  | 21q22.3              |
| 209541_at   | IGF1      | AI972496   | 1.888       | 0.0336  | 12q22-q23            |
| 213094_at   | GPR126    | AL033377   | 1.881       | 0.02    | 6q24.1               |
| 205592_at   | SLC4A1    | NM_000342  | 1.853       | 0.0294  | 17q21-q22            |
| 219087_at   | ASPN      | NM_017680  | 1.829       | 0.0007  | 9q22                 |
| 210198_s_at | PLP1      | BC002665   | 1.787       | 0.0086  | Xq22                 |
| 205168_at   | DDR2      | NM_006182  | 1.769       | 0.04    | 1q12-q23             |
| 208037_s_at | MADCAM1   | NM_007164  | 1.759       | 0.0079  | 19p13.3              |
| 209840_s_at | LRRN3     | AI221950   | 1.754       | 0.0182  | 7q31.1               |
| 209242_at   | PEG3      | AL042588   | 1.752       | 0.0109  | 19q13.4              |
| 221582_at   | HIST3H2A  | BC001193   | 1.747       | 0.0001  | 1q42.13              |
| 206461_x_at | MT1H      | NM_005951  | 1.741       | 0.0493  | 16q13                |
| 215735_s_at | TSC2      | AC005600   | 1.734       | 0.0517  | 16p13.3              |
| 209335_at   | DCN       | BC005322   | 1.73        | 0.0165  | 12q13.2              |
| 203213_at   | CDC2      | AL524035   | 1.727       | 0.0422  | 10q21.1              |
| 35776_at    | ITSN1     | AF064243   | 1.722       | 0.0003  | 21q22.1-q22.2        |
| 202994_s_at | FBLN1     | Z95331     | 1.716       | 0.0271  | 22q13.31             |
| 206023_at   | NMU       | NM_006681  | 1.715       | 0.0373  | 4q12                 |
| 208850_s_at | THY1      | AL558479   | 1.71        | 0.0263  | 11q22.3-q23          |
| 210510_s_at | NRP1      | AF145712   | 1.701       | 0.0234  | 10p12                |
| 203502_at   | BPGM      | NM_001724  | 1.698       | 0.0147  | 7q31-q34             |
| 209121_x_at | NR2F      | M64497     | 1.686       | 0.0224  | 15q26                |
| 213905_x_at | BGN       | AA845258   | 1.685       | 0.0099  | 18q22.3              |
| 205548_s_at | BTG3      | NM_006806  | 1.685       | 0.0079  | 21q21.1-q21.2        |
| 209220_at   | GPC3      | L47125     | 1.685       | 0.0032  | Xq26.1               |
| 212692_s_at | LRBA      | W60686     | 1.684       | 0.0153  | 4q31.23              |
| 203423_at   | RBP1      | NM_002899  | 1.677       | 0.0063  | 3q23                 |
| 214953_s_at | APP       | X06989     | 1.668       | 0.0531  | 21q21.2              |

|             |               |           |       |        |                |
|-------------|---------------|-----------|-------|--------|----------------|
| 203758_at   | CTSO          | AV729484  | 1.668 | 0.0362 | 4q31-q32       |
| 213125_at   | OLFML2B       | AW007573  | 1.666 | 0.0187 | 1q23.1         |
| 218162_at   | OLFML3        | NM_020190 | 1.659 | 0.0272 | 1p13.1         |
| 203868_s_at | VCAM1         | NM_001078 | 1.652 | 0.0383 | 1p32-p31       |
| 214724_at   | DIXDC1        | AF070621  | 1.646 | 0.0236 | 11q23.1        |
| 208579_x_at | H2BFS         | NM_017445 | 1.642 | 0.0072 | 21q22.3        |
| 208073_x_at | TTC3          | NM_003316 | 1.635 | 0.0078 | 21q22.2        |
| 207173_x_at | CDH11         | D21254    | 1.633 | 0.0147 | 16q22.1        |
| 200974_at   | ACTA2         | NM_001613 | 1.631 | 0.019  | 10q23.3        |
| 203883_s_at | RAB11FIP2     | BG249608  | 1.63  | 0.0199 | 10q26.12       |
| 204745_x_at | MT1G          | NM_005950 | 1.62  | 0.0423 | 16q13          |
| 204403_x_at | KIAA0738      | NM_014719 | 1.619 | 0.0081 | 7q35           |
| 212312_at   | COX4I2        | AL117381  | 1.617 | 0.0102 | 20q11.21       |
| 201995_at   | EXT1          | NM_000127 | 1.615 | 0.0518 | 8q24.11-q24.13 |
| 217867_x_at | BACE2         | AF178532  | 1.61  | 0.0288 | 21q22.3        |
| 221045_s_at | PER3          | NM_016831 | 1.601 | 0.0157 | 1p36.23        |
| 202403_s_at | COL1A2        | NM_000089 | 1.596 | 0.0192 | 7q22.1         |
| 212489_at   | COL5A1        | AI983428  | 1.595 | 0.0345 | 9q34.2-q34.3   |
| 202202_s_at | LAMA4         | NM_002290 | 1.591 | 0.0488 | 6q21           |
| 202016_at   | MEST          | NM_002402 | 1.59  | 0.0385 | 7q32           |
| 209735_at   | ABCG2         | AF098951  | 1.587 | 0.0003 | 4q22           |
| 201069_at   | MMP2          | NM_004530 | 1.586 | 0.0069 | 16q13-q21      |
| 209081_s_at | COL18A1       | AF018081  | 1.57  | 0.0079 | 21q22.3        |
| 201312_s_at | SH3BGR1       | NM_003022 | 1.559 | 0.005  | Xq13.3         |
| 200943_at   | HMG1          | NM_004965 | 1.558 | 0.0085 | 21q22.3        |
| 205131_x_at | CLEC11A       | NM_002975 | 1.556 | 0.0129 | 19q13.3        |
| 214439_x_at | BIN1          | AF043899  | 1.556 | 0.0499 | 2q14           |
| 206101_at   | ECM2          | NM_001393 | 1.554 | 0.0079 | 9q22.3         |
| 205151_s_at | KIAA0644      | AV724192  | 1.547 | 0.0182 | 7p15.1         |
| 202310_s_at | COL1A1        | K01228    | 1.546 | 0.0333 | 17q21.3-q22.1  |
| 204785_x_at | IFNAR2        | L41944    | 1.545 | 0.0002 | 21q22.1        |
| 203865_s_at | ADARB1        | NM_015833 | 1.541 | 0.011  | 21q22.3        |
| 209656_s_at | TMEM47        | AL136550  | 1.54  | 0.0171 | Xp11.4         |
| 65588_at    | LOC388796     | AA827892  | 1.536 | 0.0098 | 20q12          |
| 209033_s_at | DYRK1A        | D86550    | 1.528 | 0.0045 | 21q22.13       |
| 201525_at   | APOD          | NM_001647 | 1.526 | 0.0041 | 3q26.2-qter    |
| 204359_at   | FLRT2         | NM_013231 | 1.522 | 0.0295 | 14q24-q32      |
| 213661_at   | DKFZP586H2123 | AI671186  | 1.516 | 0.0451 | 11p13          |
| 205413_at   | MPPED2        | NM_001584 | 1.513 | 0.0012 | 11p13          |
| 219767_s_at | CRYZL1        | NM_005111 | 1.512 | 0.0007 | 21q21.3        |
| 204505_s_at | EPB49         | NM_001978 | 1.505 | 0.0078 | 8p21.1         |
| 211113_s_at | ABCG1         | U34919    | 1.503 | 0.019  | 21q22.3        |
| 219935_at   | ADAMTS5       | NM_007038 | 1.5   | 0.0297 | 21q21.3        |
| 221564_at   | PRMT2         | AL570294  | 1.496 | 0.0023 | 21q22.3        |
| 201417_at   | SOX4          | AL136179  | 1.491 | 0.0346 | 6p22.3         |
| 213791_at   | PENK          | NM_006211 | 1.49  | 0.041  | 8q23-q24       |
| 201431_s_at | DPYSL3        | NM_001387 | 1.487 | 0.0046 | 5q32           |
| 221447_s_at | GLT8D2        | NM_031302 | 1.485 | 0.051  | 12q            |
| 204112_s_at | HNMT          | NM_006895 | 1.483 | 0.0155 | 2q22.1         |
| 217764_s_at | RAB31         | AF183421  | 1.482 | 0.0489 | 18p11.3        |
| 203896_s_at | PLCB4         | AL535113  | 1.482 | 0.0175 | 20p12          |
| 202465_at   | PCOLCE        | NM_002593 | 1.482 | 0.0333 | 7q22           |

|             |          |           |       |        |                 |
|-------------|----------|-----------|-------|--------|-----------------|
| 204462_s_at | SLC16A2  | NM_006517 | 1.482 | 0      | Xq13.2          |
| 203185_at   | RASSF2   | NM_014737 | 1.481 | 0.0546 | 20pter-p12.1    |
| 218585_s_at | RAMP     | AK001261  | 1.48  | 0.0342 | 1q32.3          |
| 213296_at   | PEX10    | BF339133  | 1.48  | 0.0458 | 1pter-q24       |
| 201642_at   | IFNGR2   | NM_005534 | 1.476 | 0.0062 | 21q22.11        |
| 221689_s_at | PIGP     | AB035745  | 1.475 | 0.0004 | 21q22.2         |
| 214730_s_at | GLG1     | AK025457  | 1.471 | 0.0078 | 16q22-q23       |
| 221249_s_at | FAM117A  | NM_030802 | 1.47  | 0.0083 | 17q21.33        |
| 204759_at   | RCBTB2   | NM_001268 | 1.462 | 0.0206 | 13q14.3         |
| 214988_s_at | SON      | X63071    | 1.462 | 0.0121 | 21q22.1-q22.2   |
| 221814_at   | GPR124   | BF511315  | 1.462 | 0.0512 | 8p11.23         |
| 209560_s_at | DLK1     | U15979    | 1.458 | 0.0472 | 14q32           |
| 204556_s_at | DZIP1    | AL568422  | 1.456 | 0.0401 | 13q32.1         |
| 211546_x_at | NACP     | L36674    | 1.456 | 0.0425 | 4q21            |
| 213392_at   | IQCK     | AW070229  | 1.455 | 0.0503 | 16p13.11        |
| 218386_x_at | USP16    | AI806796  | 1.454 | 0.043  | 21q22.11        |
| 201427_s_at | SEPP1    | NM_005410 | 1.452 | 0.0423 | 5q31            |
| 202242_at   | TSPAN7   | NM_004615 | 1.449 | 0.0137 | Xp11.4          |
| 213074_at   | IRAK1BP1 | BG545769  | 1.444 | 0.007  | 6q14-q15        |
| 203454_s_at | ATOX1    | NM_004045 | 1.441 | 0.0264 | 5q32            |
| 208818_s_at | COMT     | BC000419  | 1.44  | 0.0357 | 22q11.21-q11.23 |
| 207827_x_at | SNCA     | NM_007308 | 1.439 | 0.0364 | 4q21            |
| 210715_s_at | KOP      | AF027205  | 1.436 | 0.0291 | 19q13.1         |
| 211161_s_at | COL3A1   | AF130082  | 1.434 | 0.0423 | 2q31            |
| 203417_at   | MFAP2    | NM_017459 | 1.434 | 0.0491 | 1p36.1-p35      |
| 208407_s_at | CTNND1   | NM_001331 | 1.433 | 0.0193 | 11q11           |
| 212846_at   | KIAA0179 | AA811192  | 1.428 | 0.012  | 21q22.3         |
| 203562_at   | FEZ1     | NM_005103 | 1.426 | 0.0324 | 11q24.2         |
| 213685_at   | TCEB3    | AA830143  | 1.426 | 0.0429 | 1p36.1          |
| 204037_at   | EDG2     | BF055366  | 1.426 | 0.0168 | 9q32            |
| 204354_at   | POT1     | NM_015450 | 1.425 | 0.0158 | 7q31.33         |
| 215157_x_at | PABPC1   | AI734929  | 1.423 | 0.0127 | 8q22.2-q23      |
| 211065_x_at | PFKL     | BC006422  | 1.419 | 0.0088 | 21q22.3         |
| 203477_at   | COL15A1  | NM_001855 | 1.413 | 0.0349 | 9q21-q22        |
| 211675_s_at | MDFIC    | AF054589  | 1.41  | 0.0537 | 7q31.2          |
| 218609_s_at | NUDT2    | NM_001161 | 1.41  | 0.0301 | 9p13            |
| 212762_s_at | TCF7L2   | AI375916  | 1.409 | 0.0302 | 10q25.3         |
| 212970_at   | APBB2    | AI694303  | 1.409 | 0.0106 | 4p14            |
| 213541_s_at | ERG      | AI351043  | 1.405 | 0.0321 | 21q22.3         |
| 203449_s_at | TERF1    | NM_017489 | 1.402 | 0.0167 | 8q13            |
| 212337_at   | TUG1     | AI687738  | 1.393 | 0.0088 | 22q12.2         |
| 219049_at   | ChGn     | NM_018371 | 1.393 | 0.0109 | 8p21.3          |
| 205433_at   | BCHE     | NM_000055 | 1.388 | 0.049  | 3q26.1-q26.2    |
| 209897_s_at | SLIT2    | AF055585  | 1.383 | 0.0424 | 4p15.2          |
| 206766_at   | ITGA10   | AF112345  | 1.378 | 0.0354 | 1q21            |
| 221476_s_at | EC45     | AF279903  | 1.378 | 0.0316 | 3p24.1          |
| 205236_x_at | SOD3     | NM_003102 | 1.372 | 0.0095 | 4p16.3-q21      |
| 200986_at   | SERPING1 | NM_000062 | 1.369 | 0.0466 | 11q12-q13.1     |
| 209707_at   | PIGK     | AF022913  | 1.363 | 0.0102 | 1p31.1          |
| 211955_at   | RANBP5   | NM_002271 | 1.357 | 0.011  | 13q32.2         |
| 200740_s_at | SUMO3    | BG338532  | 1.357 | 0.0183 | 21q22.3         |
| 201814_at   | TBC1D5   | NM_014744 | 1.345 | 0.0236 | 3p24.3          |

|             |           |           |        |        |               |
|-------------|-----------|-----------|--------|--------|---------------|
| 214273_x_at | C16orf35  | AV704353  | 1.343  | 0.0395 | 16p13.3       |
| 219025_at   | CD248     | NM_020404 | 1.342  | 0.0382 | 11q13         |
| 213750_at   | CSIG      | AA928506  | 1.338  | 0.0391 | 16p13.13      |
| 209575_at   | IL10RB    | BC001903  | 1.332  | 0.0023 | 21q22.1-q22.2 |
| 212698_s_at | SEPT10    | BF966021  | 1.331  | 0.0411 | 2q13          |
| 209428_s_at | ZFPL1     | BG420865  | 1.328  | 0.0031 | 11q13         |
| 213881_x_at | SUMO2     | AI971724  | 1.325  | 0.0247 | 17q25         |
| 201719_s_at | EPB41L2   | NM_001431 | 1.324  | 0.0525 | 6q23          |
| 201292_at   | TOP2A     | AL561834  | 1.322  | 0.0023 | 17q21-q22     |
| 214746_s_at | ZNF467    | BE549732  | 1.32   | 0.0429 | 7q36.1        |
| 208779_x_at | DDR1      | L20817    | 1.319  | 0.0071 | 6p21.3        |
| 218558_s_at | MRPL39    | NM_017446 | 1.318  | 0.0416 | 21q21.3       |
| 204400_at   | EFS       | NM_005864 | 1.315  | 0.0436 | 14q11.2-q12   |
| 202643_s_at | TNFAIP3   | AI738896  | 1.31   | 0.0275 | 6q23          |
| 205011_at   | LOH11CR2A | NM_014622 | 1.306  | 0.0096 | 11q23         |
| 201778_s_at | KIAA0494  | NM_014774 | 1.305  | 0.0205 | 1pter-p22.1   |
| 204450_x_at | APOA1     | NM_000039 | 1.3    | 0.0308 | 11q23-q24     |
| 212372_at   | NMMHCB    | AK026977  | 1.3    | 0.0432 | 17p13         |
| 41047_at    | C9orf16   | AI885170  | 1.299  | 0.054  | 9q34.1        |
| 201965_s_at | SETX      | NM_015046 | 1.299  | 0.0308 | 9q34.3        |
| 47069_at    | PRR5      | AA533284  | 1.292  | 0.0118 | 22q13.31      |
| 200003_s_at | RPL28     | NM_000991 | 1.29   | 0.0448 | 19q13.4       |
| 201494_at   | PRCP      | NM_005040 | 1.289  | 0.0017 | 11q14         |
| 202075_s_at | PLTP      | NM_006227 | 1.289  | 0.019  | 20q12-q13.1   |
| 202355_s_at | GTF2F1    | BC000120  | 1.287  | 0.0366 | 19p13.3       |
| 202974_at   | MPP1      | NM_002436 | 1.287  | 0.0349 | Xq28          |
| 201590_x_at | ANXA2     | NM_004039 | 1.286  | 0.0502 | 15q21-q22     |
| 218017_s_at | FLJ32731  | NM_025070 | 1.278  | 0.0348 | 8p11.1        |
| 212565_at   | STK38L    | BE302191  | 1.274  | 0.0467 | 12p12.1       |
| 200096_s_at | ATP6V0E   | AV717561  | 1.27   | 0.0086 | 5q35.2        |
| 218870_at   | ARHGAP15  | NM_018460 | 1.263  | 0.0108 | 2q22.3        |
| 216381_x_at | AKR7A2    | AL035413  | 1.256  | 0.0156 | 1p36.13       |
| 209263_x_at | TSPAN4    | BC000389  | 1.252  | 0.0286 | 11p15.5       |
| 218927_s_at | CHST12    | BC002918  | 1.251  | 0.0484 | 7p22          |
| 205176_s_at | ITGB3BP   | NM_014288 | 1.25   | 0.0186 | 1p31.3        |
| 200023_s_at | EIF3S5    | AI001896  | 1.246  | 0.0475 | 11p15.4       |
| 204568_at   | KIAA0831  | NM_014924 | 1.246  | 0.0296 | 14q22.2       |
| 203473_at   | SLCO2B1   | NM_007256 | 1.244  | 0.0068 | 11q13         |
| 209168_at   | GPM6B     | AW148844  | 1.242  | 0.0497 | Xp22.2        |
| 203028_s_at | CYBA      | NM_000101 | 1.231  | 0.0503 | 16q24         |
| 218253_s_at | LGTN      | NM_006893 | 1.227  | 0.0274 | 1q31-q32      |
| 219175_s_at | SLC41A3   | NM_017836 | 1.21   | 0.0126 | 3q21.2        |
| 212658_at   | LHFPL2    | N66633    | 1.203  | 0.0253 | 5q14.1        |
| 204571_x_at | PIN4      | BE797213  | -1.205 | 0.0272 | Xq13          |
| 217774_s_at | HSPC152   | NM_016404 | -1.209 | 0.055  | 11q13.1       |
| 215416_s_at | STOML2    | AC004472  | -1.211 | 0.0525 | 9p13.1        |
| 215380_s_at | C7orf24   | AK021779  | -1.212 | 0.0119 | 7p15-p14      |
| 203669_s_at | DGAT1     | NM_012079 | -1.214 | 0.0445 | 8q24.3        |
| 212369_at   | ZNF384    | AI264312  | -1.215 | 0.0322 | 12p13.31      |
| 202739_s_at | PHKB      | NM_000293 | -1.217 | 0.0516 | 16q12-q13     |
| 217950_at   | NOSIP     | NM_015953 | -1.217 | 0.0501 | 19q13.33      |
| 206621_s_at | WBSCR1    | NM_022170 | -1.217 | 0.0497 | 7q11.23       |

|             |          |           |        |        |               |
|-------------|----------|-----------|--------|--------|---------------|
| 218830_at   | RPL26L1  | NM_016093 | -1.218 | 0.0394 | 5q35.2        |
| 202618_s_at | MeCP-2   | L37298    | -1.220 | 0.0381 | Xq28          |
| 205277_at   | PRDM2    | NM_012231 | -1.221 | 0.0321 | 1p36          |
| 201186_at   | LRPAP1   | NM_002337 | -1.225 | 0.0237 | 4p16.3        |
| 204097_s_at | RBMX2    | AF078865  | -1.225 | 0.0262 | Xq26.1        |
| 201584_s_at | DDX39    | NM_005804 | -1.229 | 0.0199 | 19p13.13      |
| 215088_s_at | RPA1     | BG110532  | -1.230 | 0.0456 | 17p13.3       |
| 209165_at   | AATF     | AF083208  | -1.230 | 0.0168 | 17q11.2-q12   |
| 205963_s_at | DNAJA3   | NM_005147 | -1.232 | 0.0275 | 16p13.3       |
| 209080_x_at | TXNL2    | AF118652  | -1.232 | 0.0384 | 6p25.3        |
| 209075_s_at | ISCU     | AY009128  | -1.233 | 0.0035 | 12q24.1       |
| 209514_s_at | RAB27A   | BE502030  | -1.233 | 0.0186 | 15q21.3       |
| 219394_at   | PGS1     | NM_024419 | -1.233 | 0.0387 | 17q25.3       |
| 207922_s_at | MAEA     | NM_005882 | -1.233 | 0.0476 | 4p16.3        |
| 209796_s_at | TMEM4    | BC001027  | -1.235 | 0.0499 | 12q15         |
| 218497_s_at | RNASEH1  | BG534527  | -1.238 | 0.0403 | 2p25          |
| 213702_x_at | ASAH1    | AI934569  | -1.242 | 0.0125 | 8p22-p21.3    |
| 214042_s_at | MDS1     | AW071997  | -1.244 | 0.0436 | 3q26.2        |
| 203103_s_at | PRPF19   | NM_014502 | -1.245 | 0.0326 | 11q12.2       |
| 221736_at   | KIAA1219 | BG236163  | -1.245 | 0.0414 | 20q12         |
| 210273_at   | PCDH7    | AB006757  | -1.245 | 0.0261 | 4p15          |
| 203406_at   | MFAP1    | NM_005926 | -1.247 | 0.0194 | 15q15-q21     |
| 203517_at   | MTX2     | NM_006554 | -1.247 | 0.0059 | 2q31.2        |
| 212852_s_at | TROVE2   | AL538601  | -1.248 | 0.0414 | 1q31          |
| 213398_s_at | HCDI     | AI347090  | -1.250 | 0.0362 | 14q11.2       |
| 209331_s_at | MAX      | AA723514  | -1.250 | 0.0485 | 14q23         |
| 200803_s_at | TEGT     | NM_003217 | -1.252 | 0.0505 | 12q12-q13     |
| 217795_s_at | TMEM43   | NM_024334 | -1.252 | 0.0273 | 3p25.1        |
| 209856_x_at | ABI2     | U31089    | -1.253 | 0.0137 | 2q33          |
| 205562_at   | RPP38    | NM_006414 | -1.255 | 0.0359 | 10p13         |
| 219185_at   | SIRT5    | NM_012241 | -1.255 | 0.029  | 6p23          |
| 208749_x_at | FLOT1    | AA507012  | -1.256 | 0.041  | 6p21.3        |
| 213011_s_at | TP11     | BF116254  | -1.259 | 0.0091 | 12p13.31      |
| 202487_s_at | H2AFV    | NM_012412 | -1.259 | 0.0039 | 7p13          |
| 205412_at   | ACAT1    | NM_000019 | -1.261 | 0.0357 | 11q22.3-q23.1 |
| 209389_x_at | DBI      | M15887    | -1.261 | 0.0262 | 2q12-q21      |
| 203663_s_at | COX5A    | NM_004255 | -1.263 | 0.04   | 15q25         |
| 204030_s_at | SCHIP1   | NM_014575 | -1.267 | 0.0381 | 3q25.33       |
| 218686_s_at | RHBDF1   | NM_022450 | -1.269 | 0.0159 | 16p13.3       |
| 212053_at   | KIAA0251 | AK025504  | -1.271 | 0.0363 | 16p13.13      |
| 200947_s_at | GLUD1    | NM_005271 | -1.272 | 0.0269 | 10q23.3       |
| 203613_s_at | NDUFB6   | NM_002493 | -1.272 | 0.0318 | 9p13.3        |
| 204232_at   | FCER1G   | NM_004106 | -1.274 | 0.0289 | 1q23          |
| 209345_s_at | PI4KII   | AL561930  | -1.276 | 0.0454 | 10q24         |
| 208687_x_at | HSC70    | AF352832  | -1.277 | 0.0247 | 11q24.1       |
| 218307_at   | RSAD1    | NM_018346 | -1.277 | 0.0257 | 17q21.33      |
| 205633_s_at | ALAS1    | NM_000688 | -1.277 | 0.0113 | 3p21.1        |
| 211318_s_at | RAE1     | U85943    | -1.279 | 0.006  | 20q13.31      |
| 219244_s_at | MRPL46   | NM_022163 | -1.279 | 0.0388 | 15q24-q25     |
| 43977_at    | TMEM161A | AI660497  | -1.282 | 0.0414 | 19p13.11      |
| 210014_x_at | IDH3B    | AF023266  | -1.284 | 0.0154 | 20p13         |
| 202121_s_at | CHMP2A   | NM_014453 | -1.287 | 0.0155 | 19q           |

|             |          |           |        |        |               |
|-------------|----------|-----------|--------|--------|---------------|
| 201937_s_at | DNPEP    | NM_012100 | -1.287 | 0.023  | 2q36.1        |
| 218970_s_at | CUTC     | NM_015960 | -1.289 | 0.0405 | 10q24.31      |
| 201517_at   | NCBP2    | BC001255  | -1.289 | 0.0163 | 3q29          |
| 208909_at   | UQCRFS1  | BC000649  | -1.292 | 0.0242 | 19q12-q13.1   |
| 218093_s_at | ANKRD10  | NM_017664 | -1.295 | 0.0356 | 13q34         |
| 50376_at    | ZNF444   | AI278629  | -1.295 | 0.011  | 19q13.43      |
| 202427_s_at | BRP44    | NM_015415 | -1.295 | 0.0528 | 1q24          |
| 207515_s_at | POLR1C   | NM_004875 | -1.297 | 0.0126 | 6p21.1        |
| 219940_s_at | FLJ11305 | NM_018386 | -1.299 | 0.0331 | 13q34         |
| 209142_s_at | UBE2G1   | BC002775  | -1.299 | 0.0465 | 1q42          |
| 213838_at   | NOL7     | AA191426  | -1.299 | 0.0258 | 6p23          |
| 218022_at   | VRK3     | NM_016440 | -1.300 | 0.0317 | 19q13         |
| 221264_s_at | TARDBP   | NM_031214 | -1.300 | 0.0495 | 1p36.22       |
| 212825_at   | PAXIP1   | AI357401  | -1.300 | 0.0404 | 7q36          |
| 211784_s_at | SFRS1    | BC006181  | -1.304 | 0.0263 | 17q22         |
| 218996_at   | TFPT     | NM_013342 | -1.305 | 0.0017 | 19q13         |
| 218068_s_at | ZNF672   | NM_024836 | -1.305 | 0.0173 | 1q44          |
| 203858_s_at | COX10    | NM_001303 | -1.307 | 0.0101 | 17p12-17p11.2 |
| 201903_at   | UQCRC1   | NM_003365 | -1.307 | 0.0142 | 3p21.3        |
| 202607_at   | NDST1    | AL526632  | -1.307 | 0.0371 | 5q33.1        |
| 211366_x_at | IL1BCE   | U13698    | -1.309 | 0.0191 | 11q23         |
| 218190_s_at | UCRC     | NM_013387 | -1.309 | 0.0017 | 22cen-q12.3   |
| 53987_at    | RANBP10  | AL041852  | -1.311 | 0.0145 | 16q22.1       |
| 218682_s_at | SLC4A1AP | NM_018158 | -1.311 | 0.0128 | 2p23.3        |
| 221897_at   | TRIM52   | AA205660  | -1.311 | 0.0134 | 5q35.3        |
| 201740_at   | NDUFS3   | NM_004551 | -1.314 | 0.0294 | 11p11.11      |
| 216977_x_at | SNRPA1   | AJ130972  | -1.314 | 0.0464 | 15q26.3       |
| 201035_s_at | HADH     | BC000306  | -1.314 | 0.0273 | 4q22-q26      |
| 202757_at   | COBRA1   | NM_015456 | -1.316 | 0.0107 | 9q34          |
| 200078_s_at | ATP6V0B  | BC005876  | -1.318 | 0.0542 | 1p32.3        |
| 203113_s_at | EEF1D    | NM_001960 | -1.321 | 0.0475 | 8q24.3        |
| 202154_x_at | TUBB3    | NM_006086 | -1.325 | 0.0521 | 16q24.3       |
| 221506_s_at | TNPO2    | BG258639  | -1.325 | 0.0338 | 19p13.2       |
| 222025_s_at | OPLAH    | AI991887  | -1.325 | 0.0335 | 8q24.3        |
| 207945_s_at | CSNK1D   | NM_001893 | -1.326 | 0.0135 | 17q25         |
| 217961_at   | FLJ20551 | NM_017875 | -1.326 | 0.0423 | 3p21.33       |
| 207302_at   | SGCG     | NM_000231 | -1.330 | 0.0325 | 13q12         |
| 220934_s_at | MGC3196  | NM_024084 | -1.333 | 0.0142 | 11q12.3       |
| 203781_at   | MRPL33   | NM_004891 | -1.333 | 0.0318 | 2p21          |
| 209808_x_at | ING1     | AW193656  | -1.335 | 0.0058 | 13q34         |
| 212694_s_at | PCCB     | NM_000532 | -1.335 | 0.0462 | 3q21-q22      |
| 37549_g_at  | PTHB1    | U87408    | -1.335 | 0.0514 | 7p14          |
| 217918_at   | DYNLRB1  | NM_014183 | -1.337 | 0.0338 | 20q11.21      |
| 218024_at   | BRP44L   | NM_016098 | -1.339 | 0.0129 | 6q27          |
| 219347_at   | NUDT15   | NM_018283 | -1.342 | 0.0318 | 13q14.12      |
| 217722_s_at | NGRN     | NM_016645 | -1.342 | 0.0363 | 15q26.1       |
| 203606_at   | NDUFS6   | NM_004553 | -1.342 | 0.0464 | 5p15.33       |
| 213133_s_at | GCSH     | AW237404  | -1.346 | 0.0209 | 1q23.3        |
| 219588_s_at | NCAPG2   | NM_017760 | -1.346 | 0.0404 | 7q36.3        |
| 203814_s_at | NQO2     | NM_000904 | -1.348 | 0.0216 | 6p25.2        |
| 203647_s_at | FDX1     | NM_004109 | -1.350 | 0.0178 | 11q22         |
| 221255_s_at | TMEM93   | NM_031298 | -1.350 | 0.0301 | 17p13.3       |

|             |              |           |        |        |                |
|-------------|--------------|-----------|--------|--------|----------------|
| 201239_s_at | SPCS2        | NM_014752 | -1.351 | 0.048  | 11q13.3        |
| 218661_at   | FLJ14154     | NM_024845 | -1.351 | 0.046  | 16p13.3        |
| 203827_at   | WIPI1        | NM_017983 | -1.351 | 0.046  | 17q24.3        |
| 200793_s_at | ACO2         | NM_001098 | -1.351 | 0.0231 | 22q11.2-q13.31 |
| 220966_x_at | ARPC5L       | NM_030978 | -1.351 | 0.0333 | 9q34.11        |
| 202734_at   | TRIP10       | NM_004240 | -1.353 | 0.0476 | 19p13.3        |
| 209759_s_at | DCI          | BC002746  | -1.355 | 0.0485 | 16p13.3        |
| 212228_s_at | DKFZP434K046 | AC004382  | -1.355 | 0.0241 | 16q13          |
| 219946_x_at | MYH14        | NM_024729 | -1.355 | 0.0482 | 19q13.33       |
| 203205_at   | JMJD2A       | NM_014663 | -1.355 | 0.031  | 1p34.1         |
| 205300_s_at | U1SNRNPBP    | NM_022717 | -1.357 | 0.0484 | 12q24.31       |
| 207253_s_at | UBN1         | NM_016936 | -1.357 | 0.0384 | 16p13.3        |
| 203847_s_at | AKAP8        | NM_005858 | -1.361 | 0.0104 | 19p13.1-q12    |
| 218809_at   | PANK2        | NM_024960 | -1.361 | 0.0395 | 20p13          |
| 213699_s_at | YWHAQ        | AA854017  | -1.364 | 0.0483 | 2p25.1         |
| 212787_at   | YLPM1        | AI952986  | -1.364 | 0.0239 | 14q24.3        |
| 221636_s_at | MOSC2        | AL136931  | -1.364 | 0.0005 | 1q42.11        |
| 204125_at   | NDUFAF1      | NM_016013 | -1.366 | 0.0338 | 15q11.2-q21.3  |
| 200658_s_at | PHB          | NM_002634 | -1.366 | 0.0284 | 17q21          |
| 212877_at   | KNS2         | AA284075  | -1.368 | 0.0201 | 14q32.3        |
| 209439_s_at | PHKA2        | D38616    | -1.368 | 0.01   | Xp22.2-p22.1   |
| 221434_s_at | DC50         | NM_031210 | -1.370 | 0.0201 | 14q24.3        |
| 203511_s_at | TRAPPC3      | AF041432  | -1.370 | 0.0271 | 1p34.3         |
| 218027_at   | MRPL15       | NM_014175 | -1.372 | 0.0522 | 8q11.2-q13     |
| 200976_s_at | TAX1BP1      | AF090891  | -1.374 | 0.03   | 7p15           |
| 218160_at   | NDUFA8       | NM_014222 | -1.376 | 0.0445 | 9q33.2-q34.11  |
| 209311_at   | BCL2L2       | D87461    | -1.377 | 0.0078 | 14q11.2-q12    |
| 202243_s_at | PSMB4        | NM_002796 | -1.377 | 0.0518 | 1q21           |
| 202560_s_at | C1orf77      | NM_015607 | -1.377 | 0.0124 | 1q22           |
| 36564_at    | IBRDC3       | W27419    | -1.379 | 0.0245 | 1p34.3         |
| 212673_at   | METAP1       | D42084    | -1.381 | 0.0455 | 4q23           |
| 203565_s_at | MNAT1        | NM_002431 | -1.383 | 0.0308 | 14q23          |
| 41037_at    | RTEF1        | U63824    | -1.385 | 0.0277 | 12p13.2-p13.3  |
| 210036_s_at | HERG         | AB044806  | -1.385 | 0.0291 | 7q35-q36       |
| 202394_s_at | ABCF3        | NM_018358 | -1.391 | 0.0128 | 3q27.3         |
| 203193_at   | ESRRA        | NM_004451 | -1.393 | 0.0111 | 11q13          |
| 218372_at   | MED9         | NM_018019 | -1.393 | 0.0106 | 17p11.2        |
| 201275_at   | FDPS         | NM_002004 | -1.397 | 0.0203 | 1q22           |
| 221821_s_at | C12orf41     | AK022732  | -1.399 | 0.0449 | 12q13.12       |
| 201032_at   | BLCAP        | NM_006698 | -1.399 | 0.0022 | 20q11.2-q12    |
| 213346_at   | C13orf27     | BE748563  | -1.401 | 0.0105 | 13q33.1        |
| 212293_at   | HIPK1        | BG111260  | -1.401 | 0.052  | 1p13.1         |
| 200754_x_at | SFRS2        | NM_003016 | -1.403 | 0.0366 | 17q25.3        |
| 210896_s_at | ASPH         | AF306765  | -1.403 | 0.0468 | 8q12.1         |
| 200634_at   | PFN1         | NM_005022 | -1.404 | 0.0499 | 17p13.3        |
| 218777_at   | REEP4        | NM_025232 | -1.404 | 0.0421 | 8p21.3         |
| 202383_at   | JARID1C      | NM_004187 | -1.404 | 0.043  | Xp11.22-p11.21 |
| 214846_s_at | ALPK3        | AB037751  | -1.406 | 0.0207 | 15q25.2        |
| 221069_s_at | CCDC44       | NM_016360 | -1.406 | 0.0333 | 17q24.2        |
| 203340_s_at | SLC25A12     | AI887457  | -1.408 | 0.0088 | 2q24           |
| 200764_s_at | CTNNA1       | AI826881  | -1.408 | 0.0345 | 5q31           |
| 215424_s_at | SKIIP        | AV689564  | -1.410 | 0.0066 | 14q24.3        |

|             |                    |           |        |        |               |
|-------------|--------------------|-----------|--------|--------|---------------|
| 200070_at   | C2orf24            | BC001393  | -1.410 | 0.0028 | 2q36.1        |
| 201323_at   | EBNA1BP2           | NM_006824 | -1.412 | 0.0174 | 1p35-p33      |
| 1487_at     | ESRRA              | L38487    | -1.416 | 0.0217 | 11q13         |
| 208728_s_at | CDC42              | BC003682  | -1.416 | 0.0047 | 1p36.1        |
| 218536_at   | MRS2L              | AF052167  | -1.416 | 0.0054 | 6p22.3-p22.1  |
| 218714_at   | MGC3121            | NM_024031 | -1.418 | 0.0191 | 16p11.2       |
| 218234_at   | ING4               | NM_016162 | -1.420 | 0.0537 | 12p13.31      |
| 201192_s_at | PITPNA             | NM_006224 | -1.420 | 0.0045 | 17p13.3       |
| 204331_s_at | MRPS12             | AA587905  | -1.420 | 0.0298 | 19q13.1-q13.2 |
| 201489_at   | PPIF               | BC005020  | -1.422 | 0.0398 | 10q22-q23     |
| 218934_s_at | HSPB7              | NM_014424 | -1.422 | 0.032  | 1p36.23-p34.3 |
| 203229_s_at | CLK2               | NM_003993 | -1.422 | 0.0385 | 1q21          |
| 205181_at   | ZNF193             | NM_006299 | -1.422 | 0.0433 | 6p21.3        |
| 208424_s_at | CIAPIN1            | NM_020313 | -1.427 | 0.005  | 16q13-q21     |
| 200987_x_at | PSME3              | AA758755  | -1.427 | 0.0081 | 17q21         |
| 209488_s_at | RBP-MS             | D84109    | -1.427 | 0.0046 | 8p12-p11      |
| 202128_at   | KIAA0317           | NM_014821 | -1.429 | 0.0361 | 14q24.2       |
| 213794_s_at | NGDN               | AI269117  | -1.431 | 0.0107 | 14q11.2       |
| 205356_at   | USP13              | NM_003940 | -1.431 | 0.0317 | 3q26.2-q26.3  |
| 208827_at   | PSMB6              | BC000835  | -1.433 | 0.0465 | 17p13         |
| 218442_at   | TTC4               | NM_004623 | -1.437 | 0.0448 | 1p31.3        |
| 59625_at    | NOL3               | AI912351  | -1.439 | 0.0075 | 16q22.1       |
| 204706_at   | INPP5E             | NM_019892 | -1.439 | 0.0098 | 9q34.3        |
| 201157_s_at | NMT1               | AF020500  | -1.443 | 0.0081 | 17q21.31      |
| 219146_at   | C17orf42           | NM_024683 | -1.445 | 0.0504 | 17q11.2       |
| 204288_s_at | SORBS2             | NM_021069 | -1.451 | 0.0364 | 4q35.1        |
| 219314_s_at | ZNF219             | NM_016423 | -1.453 | 0.0206 | 14q11         |
| 219032_x_at | CHML               | NM_014322 | -1.453 | 0.0055 | 1q43          |
| 201842_s_at | EFEMP1             | AI826799  | -1.453 | 0.0268 | 2p16          |
| 203243_s_at | PDLIM5             | NM_006457 | -1.456 | 0.0265 | 4q22          |
| 212456_at   | KIAA0664           | AB014564  | -1.460 | 0.0192 | 17p13.3       |
| 204824_at   | ENDOG              | NM_004435 | -1.466 | 0.0056 | 9q34.1        |
| 217249_x_at | WUGSC:H_RG162B04.1 | AC004544  | -1.471 | 0.0193 | 4q22.3        |
| 201422_at   | IFI30              | NM_006332 | -1.473 | 0.0234 | 19p13.1       |
| 219142_at   | RASL11B            | NM_023940 | -1.473 | 0.0287 | 4q12          |
| 204547_at   | RAB40B             | NM_006822 | -1.475 | 0.0221 | 17q25.3       |
| 209248_at   | GHITM              | AL136713  | -1.477 | 0.0233 | 10q23.2       |
| 206453_s_at | NDRG2              | NM_016250 | -1.477 | 0.0457 | 14q11.2       |
| 213213_at   | DATF1              | AL035669  | -1.481 | 0.0056 | 20q13.33      |
| 204122_at   | TYROBP             | NM_003332 | -1.481 | 0.0049 | 19q13.1       |
| 203275_at   | IRF2               | NM_002199 | -1.481 | 0.0209 | 4q34.1-q35.1  |
| 200850_s_at | AHCYL1             | NM_006621 | -1.484 | 0.0343 | 1p12          |
| 212277_at   | MTMR4              | AB014547  | -1.486 | 0.009  | 17q22-q23     |
| 209039_x_at | EHD1               | AF001434  | -1.488 | 0.0118 | 11q13         |
| 212872_s_at | TRFP               | AK023092  | -1.488 | 0.0046 | 6p21.1        |
| 206059_at   | ZNF91              | NM_003430 | -1.490 | 0.0103 | 19p13.1-p12   |
| 215711_s_at | WEE1               | AJ277546  | -1.493 | 0.053  | 11p15.3-p15.1 |
| 205295_at   | CKMT2              | NM_001825 | -1.497 | 0.0003 | 5q13.3        |
| 220688_s_at | MRT4               | NM_016183 | -1.499 | 0.0331 | 1p36.13       |
| 218938_at   | FBXL15             | NM_024326 | -1.502 | 0.0253 | 10q24.32      |
| 219310_at   | C20orf39           | NM_024893 | -1.502 | 0.0017 | 20p11.21      |
| 218869_at   | MLYCD              | NM_012213 | -1.504 | 0.0408 | 16q23.3       |



|             |            |           |        |        |                 |
|-------------|------------|-----------|--------|--------|-----------------|
| 201966_at   | NDUFS2     | NM_004550 | -1.504 | 0.001  | 1q23            |
| 203880_at   | COX17      | NM_005694 | -1.504 | 0.022  | 3q13.33         |
| 218425_at   | TRIAD3     | BC000787  | -1.506 | 0.0185 | 7p22.2          |
| 218119_at   | TIMM23     | NM_006327 | -1.508 | 0.0382 | 10q11.21-q11.23 |
| 209252_at   | HARSL      | U18937    | -1.508 | 0.0161 | 5q31.3          |
| 221031_s_at | APOLD1     | NM_030817 | -1.511 | 0.0036 | 12p13.2         |
| 213510_x_at | FAM106A    | AW194543  | -1.511 | 0.046  | 17p11.2         |
| 221669_s_at | ACAD8      | BC001964  | -1.517 | 0.0249 | 11q25           |
| 203597_s_at | WBP4       | AI734228  | -1.517 | 0.0508 | 13q13.3         |
| 217935_s_at | C20orf44   | NM_018244 | -1.517 | 0.0119 | 20q11.23        |
| 201221_s_at | SNRP70     | NM_003089 | -1.522 | 0.0244 | 19q13.3         |
| 219214_s_at | RBAK       | NM_021163 | -1.524 | 0.0288 | 7p22.2          |
| 200980_s_at | MAP3K15    | BF739979  | -1.524 | 0.0088 | Xp22.2-p22.1    |
| 214027_x_at | DES        | AA889653  | -1.529 | 0.0079 | 2q35            |
| 201226_at   | NDUFB8     | NM_005004 | -1.536 | 0.016  | 10q23.2-q23.33  |
| 219045_at   | RHOF       | NM_019034 | -1.536 | 0.0153 | 12q24.31        |
| 203487_s_at | ARMC8      | NM_015396 | -1.541 | 0.0463 | 3q22.3          |
| 217959_s_at | TRAPPC4    | NM_016146 | -1.548 | 0.0257 | 11q23.3         |
| 200875_s_at | NOL5A      | NM_006392 | -1.550 | 0.0082 | 20p13           |
| 202825_at   | SLC25A4    | NM_001151 | -1.550 | 0.0263 | 4q35            |
| 218434_s_at | AACS       | NM_023928 | -1.553 | 0.0387 | 12q24.31        |
| 200894_s_at | FKBP4      | NM_002014 | -1.558 | 0.0549 | 12p13.33        |
| 205766_at   | TCAP       | NM_003673 | -1.560 | 0.0532 | 17q12           |
| 217168_s_at | HERPUD1    | AF217990  | -1.565 | 0.0331 | 16q12.2-q13     |
| 59999_at    | HIF1AN     | W37897    | -1.575 | 0.0093 | 10q24           |
| 215049_x_at | CD163      | Z22969    | -1.582 | 0.0268 | 12p13.3         |
| 201093_x_at | SDHA       | NM_004168 | -1.582 | 0.0145 | 5p15            |
| 203957_at   | E2F6       | NM_001952 | -1.592 | 0.0328 | 2p25.1          |
| 213063_at   | EML5       | BF970253  | -1.597 | 0.0522 | 14q31.3         |
| 201967_at   | RBM6       | NM_005777 | -1.597 | 0.0499 | 3p21.3          |
| 210305_at   | PDE4DIP    | AB042557  | -1.605 | 0.0172 | 1q12            |
| 204091_at   | PDE6D      | NM_002601 | -1.608 | 0.0171 | 2q35-q36        |
| 212266_s_at | SFRS5      | AW084582  | -1.613 | 0.0541 | 14q24           |
| 208813_at   | GOT1       | BC000498  | -1.616 | 0.0014 | 10q24.1-q25.1   |
| 219188_s_at | LRP16      | BC000270  | -1.616 | 0.0389 | 11q11           |
| 204676_at   | C16orf51   | NM_015421 | -1.616 | 0.005  | 16p13.13-p12.3  |
| 200768_s_at | MAT2A      | BC001686  | -1.621 | 0.0417 | 2p11.2          |
| 204186_s_at | PPID       | AI014573  | -1.621 | 0.0324 | 4q31.3          |
| 204837_at   | MTMR9      | AL080178  | -1.626 | 0.0287 | 8p23-p22        |
| 209008_x_at | KRT8       | U76549    | -1.629 | 0.047  | 12q13           |
| 214978_s_at | PPFIA4     | AK023365  | -1.629 | 0.0484 | 1q32.1          |
| 209312_x_at | HLA-DRB1   | U65585    | -1.634 | 0.0069 | 6p21.3          |
| 213648_at   | EXOSC7     | AW614427  | -1.637 | 0.0001 | 3p21.32         |
| 203367_at   | DUSP14     | NM_007026 | -1.645 | 0.0128 | 17q12           |
| 217759_at   | TRIM44     | AA176780  | -1.664 | 0.0429 | 11p13           |
| 212891_s_at | GADD45GIP1 | BF972185  | -1.664 | 0.0402 | 19p13.2         |
| 217329_x_at | COX7BP1    | AF042164  | -1.669 | 0.0318 | 22q12.3         |
| 211150_s_at | DLAT       | J03866    | -1.678 | 0.0377 | 11q23.1         |
| 205738_s_at | FABP3      | NM_004102 | -1.692 | 0.017  | 1p33-p32        |
| 203252_at   | CDK2AP2    | NM_005851 | -1.718 | 0.0211 | 11q13           |
| 215210_s_at | E2k        | S72422    | -1.724 | 0.0138 | 14q24.3         |
| 211715_s_at | BDH1       | BC005844  | -1.805 | 0.0201 | 3q29            |

|             |        |           |        |        |          |
|-------------|--------|-----------|--------|--------|----------|
| 212274_at   | LPIN1  | AV705559  | -1.838 | 0.0317 | 2p25.1   |
| 200692_s_at | HSPA9  | NM_004134 | -1.873 | 0.0463 | 5q31.1   |
| 215795_at   | MYH7B  | AK000947  | -1.923 | 0.0139 | 20q11.23 |
| 217356_s_at | PGK1   | S81916    | -1.949 | 0.0374 | Xq13     |
| 218695_at   | EXOSC4 | NM_019037 | -1.961 | 0.0498 | 8q24.3   |
| 213507_s_at | KPNB1  | BG249565  | -1.988 | 0.0012 | 17q21.32 |
| 202416_at   | DNAJC7 | NM_003315 | -2.016 | 0.0034 | 17q11.2  |
| 204963_at   | SSPN   | AL136756  | -2.132 | 0.0321 | 12p11.2  |
| 205493_s_at | DPYSL4 | NM_006426 | -2.404 | 0.0131 | 10q26    |
| 216834_at   | BL34   | S59049    | -2.653 | 0.0263 | 1q31     |
