# Supplementary material for: Altered expression of mitochondrial and extracellular matrix genes in the heart of human fetuses with chromosome 21 trisomy
Source: PubMed Central journal article supplement (PMC1964766; doi:10.1186/1471-2164-8-268), 2007-08-07
Supplement: 1471-2164-8-268-S5.pdf [file 1471-2164-8-268-S5.pdf]

**Table S4: List of downregulated genes encoding mitochondrial proteins, and of upregulated genes encoding extracellular matrix proteins.**

Hsa21 genes are in bold.

**Downregulated genes**

| Probe ID    | Fold Change (DSH/NH ratio) | Gene Name | Genbank ID |
|-------------|----------------------------|-----------|------------|
| 214274_s_at | 0.647                      | ACAA1     | AI860341   |
| 215210_s_at | 0.548                      | ACADM     | S72422     |
| 205412_at   | 0.756                      | ACAT1     | NM_000019  |
| 208967_s_at | 0.757                      | AK2       | U39945     |
| 201322_at   | 0.739                      | ATP5B     | NM_001686  |
| 208972_s_at | 0.739                      | ATP5G1    | AL080089   |
| 211715_s_at | 0.554                      | BDH1      | BC005844   |
| 205295_at   | 0.699                      | CKMT2     | NM_001825  |
| 209746_s_at | 0.721                      | COQ7      | AF032900   |
| 203858_s_at | 0.74                       | COX10     | NM_001303  |
| 218057_x_at | 0.738                      | COX4NB    | BC001472   |
| 201597_at   | 0.764                      | COX7A2    | NM_001865  |
| 201633_s_at | 0.727                      | CYB5B     | AW235051   |
| 208905_at   | 0.702                      | CYCS      | BC005299   |
| 209759_s_at | 0.729                      | DCI       | BC002746   |
| 211150_s_at | 0.568                      | DLAT      | J03866     |
| 204824_at   | 0.638                      | ENDOG     | NM_004435  |
| 201931_at   | 0.698                      | ETFA      | NM_000126  |
| 202942_at   | 0.692                      | ETFB      | NM_001985  |
| 213133_s_at | 0.713                      | GCSH      | AW237404   |
| 221415_s_at | 0.545                      | GJA10     | NM_030772  |
| 200947_s_at | 0.758                      | GLUD1     | NM_005271  |
| 208813_at   | 0.671                      | GOT1      | BC000498   |
| 203745_at   | 0.678                      | HCCS      | AI801013   |
| 200691_s_at | 0.645                      | HSPA9B    | NM_004134  |
| 210046_s_at | 0.743                      | IDH2      | U52144     |
| 202070_s_at | 0.709                      | IDH3A     | NM_005530  |
| 210418_s_at | 0.751                      | IDH3B     | AF023265   |
| 200955_at   | 0.704                      | IMMT      | NM_006839  |
| 36830_at    | 0.711                      | MIPEP     | U80034     |
| 219527_at   | 0.701                      | MOSC2     | NM_017898  |
| 218027_at   | 0.716                      | MRPL15    | NM_014175  |
| 203781_at   | 0.741                      | MRPL33    | NM_004891  |
| 218890_x_at | 0.745                      | MRPL35    | NM_016622  |
| 204331_s_at | 0.735                      | MRPS12    | AA587905   |
| 220864_s_at | 0.638                      | NDUFA13   | NM_015965  |
| 202077_at   | 0.748                      | NDUFAB1   | NM_005003  |
| 218201_at   | 0.669                      | NDUFB2    | NM_004546  |
| 201226_at   | 0.663                      | NDUFB8    | NM_005004  |
| 201966_at   | 0.62                       | NDUFS2    | NM_004550  |
| 201740_at   | 0.72                       | NDUFS3    | NM_004551  |
| 201757_at   | 0.763                      | NDUFS5    | NM_004552  |
| 202941_at   | 0.76                       | NDUFV2    | NM_021074  |
| 218455_at   | 0.712                      | NFS1      | NM_021100  |

|             |       |                    |           |
|-------------|-------|--------------------|-----------|
| 202780_at   | 0.705 | OXCT1              | NM_000436 |
| 200980_s_at | 0.598 | PDHA1              | BF739979  |
| 214225_at   | 0.677 | PIN4               | BE674061  |
| 203649_s_at | 0.657 | PLA2G2A            | NM_000300 |
| 205241_at   | 0.724 | SCO2               | NM_005138 |
| 201093_x_at | 0.591 | SDHA               | NM_004168 |
| 202675_at   | 0.744 | SDHB               | NM_003000 |
| 202004_x_at | 0.722 | SDHC               | NM_003001 |
| 203340_s_at | 0.688 | SLC25A12           | AI887457  |
| 217961_at   | 0.705 | SLC25A38           | NM_017875 |
| 202825_at   | 0.607 | SLC25A4            | NM_001151 |
| 216841_s_at | 0.734 | SOD2               | X15132    |
| 218119_at   | 0.634 | TIMM23             | NM_006327 |
| 203092_at   | 0.612 | TIMM44             | AF026030  |
| 220415_at   | 0.635 | TNNI3K             | NM_015978 |
| 209077_at   | 0.74  | TXN2               | AL022313  |
| 201903_at   | 0.75  | UQCRC1             | NM_003365 |
| 200883_at   | 0.716 | UQCRC2             | NM_003366 |
| 208909_at   | 0.744 | UQCRFS1            | BC000649  |
| 217140_s_at | 0.637 | VDAC1              | AJ002428  |
| 217249_x_at | 0.68  | WUGSC:H_RG162B04.1 | AC004544  |

### Upregulated genes

| Probe ID    | Fold Change (DSH/NH ratio) | Gene name     | GenBank ID |
|-------------|----------------------------|---------------|------------|
| 222162_s_at | 1.93                       | ADAMTS1       | AK023795   |
| 219935_at   | 1.5                        | ADAMTS5       | NM_007038  |
| 220706_at   | 2.24                       | ADAMTS7       | NM_014272  |
| 214953_s_at | 1.668                      | APP           | X06989     |
| 219087_at   | 1.829                      | ASPN          | NM_017680  |
| 220988_s_at | 1.466                      | C1QTNF3       | NM_030945  |
| 219025_at   | 1.342                      | CD248         | NM_020404  |
| 211809_x_at | 1.721                      | COL13A1       | M59217     |
| 203477_at   | 1.413                      | COL15A1       | NM_001855  |
| 209081_s_at | 1.57                       | COL18A1       | AF018081   |
| 202310_s_at | 1.546                      | COL1A1        | K01228     |
| 202403_s_at | 1.596                      | COL1A2        | NM_000089  |
| 212489_at   | 1.595                      | COL5A1        | AI983428   |
| 212091_s_at | 1.927                      | COL6A1        | AI141603   |
| 209156_s_at | 2.391                      | COL6A2        | AY029208   |
| 213622_at   | 1.434                      | COL9A2        | AI733465   |
| 204724_s_at | 1.6                        | COL9A3        | NM_001853  |
| 207420_at   | 4.268                      | COLEC10       | NM_006438  |
| 209335_at   | 1.73                       | DCN           | BC005322   |
| 213661_at   | 1.516                      | DKFZP586H2123 | AI671186   |
| 206101_at   | 1.554                      | ECM2          | NM_001393  |
| 202994_s_at | 1.716                      | FBLN1         | Z95331     |
| 204359_at   | 1.522                      | FLRT2         | NM_013231  |
| 209220_at   | 1.685                      | GPC3          | L47125     |
| 206766_at   | 1.378                      | ITGA10        | AF112345   |

|             |       |          |           |
|-------------|-------|----------|-----------|
| 216190_x_at | 3.591 | ITGB1    | AA215854  |
| 204989_s_at | 2.269 | ITGB4    | BF305661  |
| 221462_x_at | 3.113 | KLK15    | NM_017509 |
| 202202_s_at | 1.591 | LAMA4    | NM_002290 |
| 203417_at   | 1.434 | MFAP2    | NM_017459 |
| 203877_at   | 1.673 | MMP11    | NM_005940 |
| 201069_at   | 1.586 | MMP2     | NM_004530 |
| 205907_s_at | 1.961 | OMD      | AI765819  |
| 202465_at   | 1.482 | PCOLCE   | NM_002593 |
| 218585_s_at | 1.48  | RAMP     | AK001261  |
| 218452_at   | 1.859 | SMARCAL1 | NM_014140 |
| 205236_x_at | 1.372 | SOD3     | NM_003102 |
| 208606_s_at | 2.534 | WNT4     | NM_030761 |
