# Supplementary material for: Altered expression of mitochondrial and extracellular matrix genes in the heart of human fetuses with chromosome 21 trisomy
Source: PubMed Central journal article supplement (PMC1964766; doi:10.1186/1471-2164-8-268), 2007-08-07
Supplement: 1471-2164-8-268-S6.pdf [file 1471-2164-8-268-S6.pdf]

**Table S5. - Genes differentially expressed between trisomic and control samples using gc-RMA preprocessed data.**

The table includes genes with fold change > |1.2| and p<0.05 (ANOVA test). Genes are sorted according to fold change. Hsa21 genes are in bold.

| Probe ID    | Fold change | Gene name       | GenBank ID | Chromosomal location |
|-------------|-------------|-----------------|------------|----------------------|
| 205608_s_at | 4.25        | ANGPT1          | U83508     | 8q22.3-q23           |
| 222106_at   | 3.67        | PRND            | AL133396   | 20pter-p12           |
| 211560_s_at | 3.41        | ALAS2           | AF130113   | Xp11.21              |
| 213135_at   | 3.40        | <b>TIAM1</b>    | U90902     | 21q22.1              |
| 209840_s_at | 3.16        | LRRN3           | AI221950   | 7q31.1               |
| 201668_x_at | 3.00        | MARCKS          | AW163148   | 6q22.2               |
| 205593_s_at | 2.98        | <b>PDE9A</b>    | NM_002606  | 21q22.3              |
| 209156_s_at | 2.81        | <b>COL6A2</b>   | AY029208   | 21q22.3              |
| 209541_at   | 2.66        | IGF1            | AI972496   | 12q22-q23            |
| 204606_at   | 2.51        | CCL21           | NM_002989  | 9p13                 |
| 210746_s_at | 2.46        | EPB42           | M30646     | 15q15-q21            |
| 202555_s_at | 2.46        | MYLK            | NM_005965  | 3q21                 |
| 205592_at   | 2.45        | IL8             | NM_000342  | 17q21-q22            |
| 221796_at   | 2.44        | NTRK2           | AA707199   | 9q22.1               |
| 205923_at   | 2.36        | RELN            | NM_005045  | 7q22                 |
| 219213_at   | 2.34        | <b>JAM2</b>     | NM_021219  | 21q21.2              |
| 203758_at   | 2.29        | CTSO            | AV729484   | 4q31-q32             |
| 208850_s_at | 2.28        | THY1            | AL558479   | 11q22.3-q23          |
| 210198_s_at | 2.27        | PLP1            | BC002665   | Xq22                 |
| 213094_at   | 2.22        | GPR126          | AL033377   | ---                  |
| 219179_at   | 2.19        | DACT1           | NM_016651  | 14q23.1              |
| 209735_at   | 2.18        | BCRP            | AF098951   | 4q22                 |
| 222162_s_at | 2.13        | <b>ADAMTS1</b>  | AK023795   | 21q21.2              |
| 204358_s_at | 2.08        | FLRT2           | NM_013231  | 14q24-q32            |
| 214433_s_at | 2.08        | SELENBP1        | NM_003944  | 1q21-q22             |
| 202242_at   | 2.06        | TSPAN7          | NM_004615  | Xp11.4               |
| 206101_at   | 2.05        | ECM2            | NM_001393  | 9q22.3               |
| 210510_s_at | 2.04        | NRP1            | AF145712   | 10p12                |
| 217867_x_at | 2.04        | <b>BACE2</b>    | AF178532   | 21q22.3              |
| 204623_at   | 1.99        | <b>TFF3</b>     | NM_003226  | 21q22.3              |
| 208073_x_at | 1.97        | <b>TTC3</b>     | NM_003316  | 21q22.2              |
| 202350_s_at | 1.97        | MATN2           | NM_002380  | 8q22                 |
| 217525_at   | 1.95        | OLFML1          | AW305097   | 11p15.4              |
| 202557_at   | 1.95        | <b>STCH</b>     | AI718418   | 21q11.1              |
| 209220_at   | 1.94        | GPC3            | L47125     | Xq26.1               |
| 201387_s_at | 1.93        | UCHL1           | NM_004181  | 4p14                 |
| 213661_at   | 1.88        | DKFZP586H2123   | AI671186   | 11p13                |
| 209121_x_at | 1.88        | NR2F2           | M64497     | 15q26                |
| 213125_at   | 1.88        | OLFML2B         | AW007573   | 1q23.1               |
| 209866_s_at | 1.88        | LPHN3           | AF307080   | 4q13.1               |
| 213989_x_at | 1.87        | <b>SETD4</b>    | AB004853   | 21q22.13             |
| 203865_s_at | 1.87        | <b>ADARB1</b>   | NM_015833  | 21q22.3              |
| 207173_x_at | 1.86        | CDH11           | D21254     | 16q22.1              |
| 213222_at   | 1.86        | PLCB1           | AL049593   | 20p12                |
| 47069_at    | 1.85        | PRR5            | AA533284   | 22q13.31             |
| 202994_s_at | 1.83        | FBLN1           | Z95331     | 22q13.31             |
| 201497_x_at | 1.82        | MYH11           | NM_022844  | 16p13.13-p13.12      |
| 203666_at   | 1.81        | CXCL12          | NM_000609  | 10q11.1              |
| 202310_s_at | 1.81        | COL1A1          | K01228     | 17q21.3-q22.1        |
| 212846_at   | 1.81        | <b>KIAA0179</b> | AA811192   | 21q22.3              |
| 203789_s_at | 1.80        | SEMA3C          | NM_006379  | 7q21-q31             |
| 209335_at   | 1.79        | DCN             | BC005322   | 12q13.2              |
| 203185_at   | 1.79        | RASSF2          | NM_014737  | 20pter-p12.1         |
| 205548_s_at | 1.78        | <b>BTG3</b>     | NM_006806  | 21q21.1-q21.2        |
| 213541_s_at | 1.78        | <b>ERG</b>      | AI351043   | 21q22.3              |
| 201525_at   | 1.78        | APOD            | NM_001647  | 3q26.2-qter          |
| 203889_at   | 1.77        | SCG5            | NM_003020  | 15q13-q14            |
| 204785_x_at | 1.77        | <b>IFNAR2</b>   | L41944     | 21q22.1              |
| 201642_at   | 1.77        | <b>IFNGR2</b>   | NM_005534  | 21q22.11             |

|             |      |                |           |                     |
|-------------|------|----------------|-----------|---------------------|
| 204442_x_at | 1.76 | LTBP4          | NM_003573 | 19q13.1-q13.2       |
| 218377_s_at | 1.76 | <b>C21orf6</b> | NM_016940 | 21q22.11            |
| 209043_at   | 1.76 | PAPSS1         | AF033026  | 4q24                |
| 219087_at   | 1.76 | ASPN           | NM_017680 | 9q22                |
| 212713_at   | 1.75 | MFAP4          | R72286    | 17p11.2             |
| 202403_s_at | 1.75 | COL1A2         | NM_000089 | 7q22.1              |
| 201860_s_at | 1.75 | PLAT           | NM_000930 | 8p12                |
| 201830_s_at | 1.74 | NET1           | NM_005863 | 10p15               |
| 200974_at   | 1.74 | ACTA2          | NM_001613 | 10q23.3             |
| 219767_s_at | 1.74 | <b>CRYZL1</b>  | NM_005111 | 21q21.3             |
| 209578_s_at | 1.73 | <b>POFUT2</b>  | BC000626  | 21q22.3             |
| 212190_at   | 1.73 | SERPINE2       | AL541302  | 2q33-q35            |
| 214439_x_at | 1.72 | BIN1           | AF043899  | 2q14                |
| 212192_at   | 1.71 | KCTD12         | AI718937  | 13q22.1             |
| 213905_x_at | 1.71 | BGN            | AA845258  | 18q22.3             |
| 203502_at   | 1.71 | BPGM           | NM_001724 | 7q31-q34            |
| 202016_at   | 1.71 | MEST           | NM_002402 | 7q32                |
| 202450_s_at | 1.70 | CTSK           | NM_000396 | 1q21                |
| 202599_s_at | 1.70 | <b>NRIP1</b>   | NM_003489 | 21q11.2             |
| 201995_at   | 1.70 | EXT1           | NM_000127 | 8q24.11-q24.13      |
| 211709_s_at | 1.69 | CLEC11A        | BC005810  | 19q13.3 /// 19q13.3 |
| 214988_s_at | 1.69 | <b>SON</b>     | X63071    | 21q22.1-q22.2       |
| 205151_s_at | 1.69 | KIAA0644       | AV724192  | 7p15.1              |
| 217764_s_at | 1.68 | RAB31          | AF183421  | 18p11.3             |
| 209033_s_at | 1.68 | <b>DYRK1A</b>  | D86550    | 21q22.13            |
| 213428_s_at | 1.68 | <b>COL6A1</b>  | AA292373  | 21q22.3             |
| 203325_s_at | 1.68 | COL5A1         | AI130969  | 9q34.2-q34.3        |
| 209242_at   | 1.67 | PEG3           | AL042588  | 19q13.4             |
| 212269_s_at | 1.67 | <b>MCM3AP</b>  | AJ010089  | 21q22.3             |
| 205168_at   | 1.66 | DDR2           | NM_006182 | 1q12-q23            |
| 218870_at   | 1.66 | ARHGAP15       | NM_018460 | 2q22.3              |
| 213629_x_at | 1.65 | MT1A           | BF246115  | 16q13               |
| 202202_s_at | 1.65 | LAMA4          | NM_002290 | 6q21                |
| 221447_s_at | 1.64 | GLT8D2         | NM_031302 | 12q /// 12q         |
| 207191_s_at | 1.64 | ISLR           | NM_005545 | 15q23-q24           |
| 221689_s_at | 1.64 | <b>PIGP</b>    | AB035745  | 21q22.2             |
| 202749_at   | 1.64 | <b>WRB</b>     | NM_004627 | 21q22.3             |
| 212012_at   | 1.64 | D2S448         | BF342851  | 2p25                |
| 209897_s_at | 1.64 | SLIT2          | AF055585  | 4p15.2              |
| 203116_s_at | 1.63 | FECH           | NM_000140 | 18q21.3             |
| 208037_s_at | 1.63 | MADCAM1        | NM_007164 | 19p13.3 /// 19p13.3 |
| 209583_s_at | 1.63 | CD200          | AF063591  | 3q12-q13            |
| 212094_at   | 1.63 | PEG10          | BE858180  | 7q21                |
| 204745_x_at | 1.62 | MT1G           | NM_005950 | 16q13               |
| 209297_at   | 1.62 | <b>ITSN1</b>   | AF114488  | 21q22.1-q22.2       |
| 215446_s_at | 1.61 | LOX            | L16895    | --                  |
| 209082_s_at | 1.61 | <b>COL18A1</b> | AF018081  | 21q22.3             |
| 208817_at   | 1.61 | COMT           | BC000419  | 22q11.21-q11.23     |
| 214431_at   | 1.61 | GMPS           | NM_003875 | 3q24                |
| 209656_s_at | 1.61 | TM4SF10        | AL136550  | Xp11.4              |
| 208407_s_at | 1.60 | CTNND1         | NM_001331 | 11q11               |
| 209758_s_at | 1.60 | MAGP2          | U37283    | 12p13.1-p12.3       |
| 202465_at   | 1.60 | PCOLCE         | NM_002593 | 7q22                |
| 209560_s_at | 1.59 | DLK1           | U15979    | 14q32               |
| 203423_at   | 1.59 | RBP1           | NM_002899 | 3q23                |
| 201976_s_at | 1.59 | MYO10          | NM_012334 | 5p15.1-p14.3        |
| 201417_at   | 1.59 | SOX4           | AL136179  | 6p22.3              |
| 220750_s_at | 1.58 | LEPRE1         | NM_022356 | 1p34.1              |
| 219935_at   | 1.58 | <b>ADAMTS5</b> | NM_007038 | 21q21.3             |
| 221677_s_at | 1.58 | <b>DONSON</b>  | AF232674  | 21q22.1             |
| 201427_s_at | 1.58 | SEPP1          | NM_005410 | 5q31                |
| 213538_at   | 1.57 | <b>SON</b>     | AI936458  | 21q22.1-q22.2       |
| 214746_s_at | 1.57 | ZNF467         | BE549732  | 7q36.1              |
| 201431_s_at | 1.56 | DPYSL3         | NM_001387 | 5q32                |

|             |      |                |           |                |
|-------------|------|----------------|-----------|----------------|
| 221478_at   | 1.56 | BNIP3L         | AL132665  | 8p21           |
| 218162_at   | 1.55 | OLFML3         | NM_020190 | 1p13.1         |
| 213422_s_at | 1.55 | MXRA8          | AW888223  | 1p36.33        |
| 200602_at   | 1.55 | <b>APP</b>     | NM_000484 | 21q21.2        |
| 206331_at   | 1.55 | CALCRL         | NM_005795 | 2q32.2         |
| 206766_at   | 1.54 | ITGA10         | AF112345  | 1q21           |
| 215157_x_at | 1.54 | PABPC1         | AI734929  | 8q22.2-q23     |
| 204620_s_at | 1.53 | CSPG2          | NM_004385 | 5q14.3         |
| 202283_at   | 1.52 | SERPINF1       | NM_002615 | 17p13.1        |
| 203417_at   | 1.52 | MFAP2          | NM_017459 | 1p36.1-p35     |
| 218386_x_at | 1.52 | <b>USP16</b>   | AI806796  | 21q22.11       |
| 212233_at   | 1.52 | MAP1B          | AL523076  | 5q13           |
| 212761_at   | 1.51 | TCF7L2         | AI703074  | 10q25.3        |
| 219025_at   | 1.51 | CD248          | NM_020404 | 11q13          |
| 201050_at   | 1.51 | PLD3           | NM_012268 | 19q13.2        |
| 212653_s_at | 1.51 | EHBP1          | AB020710  | 2p15           |
| 200986_at   | 1.50 | SERPING1       | NM_000062 | 11q12-q13.1    |
| 201069_at   | 1.50 | MMP2           | NM_004530 | 16q13-q21      |
| 213068_at   | 1.50 | DPT            | AI146848  | 1q12-q23       |
| 221564_at   | 1.50 | <b>HRMT1L1</b> | AL570294  | 21q22.3        |
| 204112_s_at | 1.50 | HNMT           | NM_006895 | 2q22.1         |
| 212658_at   | 1.50 | LHFPL2         | N66633    | 5q14.1         |
| 203562_at   | 1.49 | FEZ1           | NM_005103 | 11q24.2        |
| 201312_s_at | 1.49 | SH3BGRL        | NM_003022 | Xq13.3         |
| 215823_x_at | 1.49 | RNF12          | U64661    | Xq13-q21       |
| 200944_s_at | 1.48 | <b>HMGNI</b>   | NM_004965 | 21q22.3        |
| 202671_s_at | 1.48 | <b>PDXK</b>    | NM_003681 | 21q22.3        |
| 209570_s_at | 1.48 | D4S234E        | BC001745  | 4p16.3         |
| 209506_s_at | 1.48 | NR2F1          | BC004154  | 5q14           |
| 213592_at   | 1.47 | HG11           | X89271    | 11q12          |
| 204114_at   | 1.47 | NID2           | NM_007361 | 14q21-q22      |
| 200989_at   | 1.47 | HIF1A          | NM_001530 | 14q21-q24      |
| 202356_s_at | 1.47 | GTF2F1         | NM_002096 | 19p13.3        |
| 209099_x_at | 1.47 | HJ1            | U73936    | 20p12.1-p11.23 |
| 209575_at   | 1.47 | <b>IL10RB</b>  | BC001903  | 21q22.1-q22.2  |
| 212665_at   | 1.47 | TIPARP         | AL556438  | 3q25.31        |
| 205381_at   | 1.47 | LRRC17         | NM_005824 | 7q22.1         |
| 215222_x_at | 1.46 | MACF1          | AK023406  | 1p32-p31       |
| 209022_at   | 1.46 | STAG2          | AK026678  | Xq25           |
| 208113_x_at | 1.45 | PABPC3         | NM_030979 | 13q12-q13      |
| 204556_s_at | 1.45 | DZIP1          | AL568422  | 13q32.1        |
| 219561_at   | 1.45 | COPZ2          | NM_016429 | 17q21.32       |
| 201292_at   | 1.45 | TOP2A          | AL561834  | 17q21-q22      |
| 213000_at   | 1.45 | <b>ZCWCC3</b>  | AP000693  | 21q22.13       |
| 205020_s_at | 1.45 | ARL4A          | NM_005738 | 7p21-p15.3     |
| 204505_s_at | 1.45 | EPB49          | NM_001978 | 8p21.1         |
| 221773_at   | 1.44 | ELK3           | AW575374  | 12q23          |
| 212736_at   | 1.44 | C16orf45       | BE299456  | 16p13.13       |
| 204568_at   | 1.43 | KIAA0831       | NM_014924 | 14q22.2        |
| 215596_s_at | 1.43 | <b>ZNF294</b>  | AL163248  | 21q22.11       |
| 200740_s_at | 1.43 | <b>SUMO3</b>   | BG338532  | 21q22.3        |
| 221476_s_at | 1.43 | RPL15          | AF279903  | 3p24.1         |
| 205433_at   | 1.43 | BCHE           | NM_000055 | 3q26.1-q26.2   |
| 203038_at   | 1.43 | PTPRK          | NM_002844 | 6q22.2-23.1    |
| 212205_at   | 1.43 | H2AFV          | AA534860  | 7p13           |
| 218930_s_at | 1.43 | TMEM106B       | AV705186  | 7p21.3         |
| 204036_at   | 1.43 | EDG2           | AW269335  | 9q32           |
| 218558_s_at | 1.42 | <b>MRPL39</b>  | NM_017446 | 21q21.3        |
| 203635_at   | 1.42 | <b>DSCR3</b>   | NM_006052 | 21q22.2        |
| 201201_at   | 1.42 | <b>CSTB</b>    | NM_000100 | 21q22.3        |
| 211065_x_at | 1.42 | <b>PFKL</b>    | BC006422  | 21q22.3        |
| 213254_at   | 1.42 | TNRC6B         | N64803    | 22q13.2        |
| 205802_at   | 1.42 | TRPC1          | NM_003304 | 3q22-q24       |
| 212354_at   | 1.42 | SULF1          | AI479175  | 8q13.2         |

|             |      |                |           |               |
|-------------|------|----------------|-----------|---------------|
| 201215_at   | 1.42 | PLS3           | NM_005032 | Xq24          |
| 212372_at   | 1.41 | NMMHCB         | AK026977  | 17p13         |
| 204985_s_at | 1.41 | TRAPPC6A       | NM_024108 | 19q13.32      |
| 201778_s_at | 1.41 | ATPAF1         | NM_014774 | 1pter-p22.1   |
| 219689_at   | 1.41 | SEMA3G         | NM_020163 | 3p21.31       |
| 201987_at   | 1.40 | THRAP1         | AI984051  | 17q22-q23     |
| 204154_at   | 1.40 | CDO1           | NM_001801 | 5q22-q23      |
| 204823_at   | 1.40 | NAV3           | NM_014903 | chr12         |
| 202201_at   | 1.39 | BLVRB          | NM_000713 | 19q13.1-q13.2 |
| 200771_at   | 1.39 | LAMC1          | NM_002293 | 1q31          |
| 213075_at   | 1.39 | OLFML2A        | AL050002  | 9q34.11       |
| 201494_at   | 1.38 | PRCP           | NM_005040 | 11q14         |
| 203697_at   | 1.38 | FRZB           | U91903    | 2qter         |
| 218086_at   | 1.38 | NPDC1          | NM_015392 | 9q34.3        |
| 204450_x_at | 1.37 | APOA1          | NM_000039 | 11q23-q24     |
| 208248_x_at | 1.37 | APLP2          | NM_001642 | 11q23-q25     |
| 208986_at   | 1.37 | TCF12          | AL559478  | 15q21         |
| 203405_at   | 1.37 | <b>DSCR2</b>   | NM_003720 | 21q22.3       |
| 204979_s_at | 1.37 | <b>SH3BGR</b>  | NM_007341 | 21q22.3       |
| 205801_s_at | 1.37 | RASGRP3        | NM_015376 | 2p25.1-p24.1  |
| 206481_s_at | 1.37 | LDB2           | NM_001290 | 4p16          |
| 221249_s_at | 1.36 | FAM117A        | NM_030802 | 17q21.33      |
| 202732_at   | 1.36 | PKIG           | NM_007066 | 20q12-q13.1   |
| 212378_at   | 1.36 | <b>GART</b>    | NM_000819 | 21q22.1       |
| 212235_at   | 1.36 | PLXND1         | AL575403  | 3q21.3        |
| 208779_x_at | 1.36 | DDR1           | L20817    | 6p21.3        |
| 218927_s_at | 1.36 | CHST12         | BC002918  | 7p22          |
| 209821_at   | 1.36 | IL33           | AB024518  | 9p24.1        |
| 219884_at   | 1.36 | LHX6           | NM_014368 | 9q34.11       |
| 32625_at    | 1.35 | NPR1           | X15357    | 1q21-q22      |
| 218477_at   | 1.35 | TMEM14A        | NM_014051 | 6p12.3        |
| 213236_at   | 1.35 | SASH1          | AK025495  | 6q24.3        |
| 204457_s_at | 1.35 | GAS1           | NM_002048 | 9q21.3-q22    |
| 203477_at   | 1.35 | COL15A1        | NM_001855 | 9q21-q22      |
| 213762_x_at | 1.34 | RBMX           | AI452524  | Xq26          |
| 208270_s_at | 1.33 | RNPEP          | NM_020216 | 1q32          |
| 201003_x_at | 1.33 | UBE2V1         | NM_003349 | 20q13.2       |
| 209272_at   | 1.33 | NAB1           | AF045451  | 2q32.3-q33    |
| 218452_at   | 1.33 | SMARCAL1       | NM_014140 | 2q34-q35      |
| 208614_s_at | 1.33 | FLNB           | M62994    | 3p14.3        |
| 203049_s_at | 1.33 | KIAA0372       | NM_014639 | 5q15          |
| 200023_s_at | 1.32 | EIF3S5         | AI001896  | 11p15.4       |
| 208838_at   | 1.32 | CAND1          | AB020636  | 12q14         |
| 203167_at   | 1.32 | TIMP2          | NM_003255 | 17q25         |
| 202421_at   | 1.32 | IGSF3          | AB007935  | 1p13          |
| 202075_s_at | 1.32 | PLTP           | NM_006227 | 20q12-q13.1   |
| 57715_at    | 1.31 | FAM26B         | W72694    | 10pter-q26.12 |
| 218326_s_at | 1.31 | LGR4           | NM_018490 | 11p14-p13     |
| 212204_at   | 1.31 | TMEM87A        | AL049944  | 15q14         |
| 200677_at   | 1.31 | <b>PTTG1IP</b> | NM_004339 | 21q22.3       |
| 202605_at   | 1.31 | GUSB           | NM_000181 | 7q21.11       |
| 41047_at    | 1.31 | C9orf16        | AI885170  | 9q34.1        |
| 201029_s_at | 1.31 | CD99           | NM_002414 | Xp22.32       |
| 213100_at   | 1.30 | UNC5B          | AA127885  | 10q22.2       |
| 201185_at   | 1.30 | HTRA1          | NM_002775 | 10q26.3       |
| 203211_s_at | 1.30 | MTMR2          | NM_016156 | 11q22         |
| 221726_at   | 1.30 | RPL22          | BE250348  | 1p36.3-p36.2  |
| 212586_at   | 1.30 | CAST           | AA195244  | 5q15-q21      |
| 213074_at   | 1.30 | PHIP           | BG545769  | 6q14-q15      |
| 209337_at   | 1.30 | PSIP2          | AF063020  | 9p22.2        |
| 204462_s_at | 1.30 | SLC16A2        | NM_006517 | Xq13.2        |
| 204759_at   | 1.29 | RCBTB2         | NM_001268 | 13q14.3       |
| 217731_s_at | 1.29 | ITM2B          | NM_021999 | 13q14.3       |
| 213392_at   | 1.29 | IQCK           | AW070229  | 16p13.11      |

|             |       |             |           |               |
|-------------|-------|-------------|-----------|---------------|
| 218684_at   | 1.29  | LRRC8D      | NM_018103 | 1p22.2        |
| 218253_s_at | 1.29  | LGTN        | NM_006893 | 1q31-q32      |
| 203919_at   | 1.29  | TCEA2       | NM_003195 | 20q13.33      |
| 211675_s_at | 1.29  | MDFIC       | AF054589  | 7q31.2        |
| 219049_at   | 1.29  | ChGn        | NM_018371 | 8p21.3        |
| 202974_at   | 1.29  | MPP1        | NM_002436 | Xq28          |
| 217890_s_at | 1.28  | PARVA       | NM_018222 | 11p15.3       |
| 56256_at    | 1.28  | SIDT2       | AA150165  | 11q23.2       |
| 204428_s_at | 1.28  | LCAT        | NM_000229 | 16q22.1       |
| 214259_s_at | 1.28  | AKR7A2      | AI144075  | 1p35.1-p36.23 |
| 214043_at   | 1.28  | PTPRD       | BF062299  | 9p23-p24.3    |
| 200003_s_at | 1.27  | RPL28       | NM_000991 | 19q13.4       |
| 217922_at   | 1.27  | MAN1A2      | BE543064  | 1p13          |
| 212294_at   | 1.27  | GNG12       | BG111761  | 1p31.2        |
| 205176_s_at | 1.27  | ITGB3BP     | NM_014288 | 1p31.3        |
| 212725_s_at | 1.27  | TUG1        | N37081    | 22q12.2       |
| 201121_s_at | 1.27  | PGRMC1      | NM_006667 | Xq22-q24      |
| 200642_at   | 1.26  | <b>SOD1</b> | NM_000454 | 21q22.1       |
| 218575_at   | 1.26  | ANAPC1      | NM_022662 | 2q12.1        |
| 203799_at   | 1.25  | CD302       | NM_014880 | 2q24.2        |
| 208801_at   | 1.25  | SRP72       | AV702627  | 4q11          |
| 200795_at   | 1.25  | SPARCL1     | NM_004684 | 4q22.1        |
| 217025_s_at | 1.25  | DBN1        | AL110225  | 5q35.3        |
| 200608_s_at | 1.25  | RAD21       | NM_006265 | 8q24          |
| 211935_at   | 1.24  | ARL6IP      | D31885    | 16p12-p11.2   |
| 218353_at   | 1.24  | RGS5        | NM_025226 | 1q23.1        |
| 213037_x_at | 1.24  | STAU1       | AJ132258  | 20q13.1       |
| 202606_s_at | 1.24  | TLK1        | NM_012290 | 2q31.1        |
| 221934_s_at | 1.24  | DALRD3      | BF941492  | 3p21.31       |
| 218109_s_at | 1.24  | MFSD1       | NM_022736 | 3q25.32       |
| 218662_s_at | 1.24  | HCAP-G      | NM_022346 | 4p16-p15      |
| 212731_at   | 1.24  | ANKRD46     | U79297    | 8q22.3        |
| 214749_s_at | 1.24  | ARMCX6      | AK000818  | Xq21.33-q22.3 |
| 212498_at   | 1.23  | MARCH-VI    | AF056433  | ---           |
| 160020_at   | 1.23  | MMP14       | Z48481    | 14q11-q12     |
| 201590_x_at | 1.23  | ANXA2       | NM_004039 | 15q21-q22     |
| 201178_at   | 1.23  | FBXO7       | NM_012179 | 22q12-q13     |
| 212698_s_at | 1.23  | SEPT10      | BF966021  | 2q13          |
| 65718_at    | 1.23  | GPR124      | AI655903  | 8p11.23       |
| 200016_x_at | 1.22  | HNRPA1      | NM_002136 | 12q13.1       |
| 36907_at    | 1.22  | MVK         | M88468    | 12q24         |
| 221511_x_at | 1.22  | CPR8        | AF212228  | 15q21.1       |
| 201217_x_at | 1.22  | RPL3        | NM_000967 | 22q13         |
| 217783_s_at | 1.22  | YPEL5       | NM_016061 | 2p23.3        |
| 205080_at   | 1.22  | RARB        | NM_000965 | 3p24          |
| 208858_s_at | 1.21  | MBC2        | BC004998  | 12q13.13      |
| 201105_at   | 1.21  | LGALS1      | NM_002305 | 22q13.1       |
| 203150_at   | 1.21  | RABEPK      | NM_005833 | 9q34.11       |
| 211983_x_at | 1.20  | ACTG1       | BE741683  | 17q25         |
| 202799_at   | 1.20  | CLPP        | NM_006012 | 19p13.3       |
| 215146_s_at | 1.20  | TTC28       | AB028966  | 22q12.1       |
| 208667_s_at | 1.20  | ST13        | U17714    | 22q13.2       |
| 210946_at   | 1.20  | PPAP2A      | AF014403  | 5q11          |
| 218938_at   | -1.20 | FBXL15      | NM_024326 | 10q24.32      |
| 205423_at   | -1.20 | AP1B1       | NM_001127 | 22q12         |
| 209389_x_at | -1.20 | DBI         | M15887    | 2q12-q21      |
| 217408_at   | -1.20 | HLA-E       | AL050361  | 6p21.3        |
| 208398_s_at | -1.20 | TBPL1       | NM_004865 | 6q22.1-q22.3  |
| 209066_x_at | -1.20 | UQBP        | M26700    | 8q22          |
| 219283_at   | -1.20 | C1GALT1C1   | NM_014158 | Xq25          |
| 202298_at   | -1.20 | NDUFA1      | NM_004541 | Xq25-q26      |
| 201479_at   | -1.20 | DKC1        | NM_001363 | Xq28          |
| 218403_at   | -1.21 | TRIAP1      | NM_016399 | 12q24.31      |
| 218074_at   | -1.21 | FAM96B      | NM_016062 | 16q22.1-q22.3 |

|             |       |           |           |               |
|-------------|-------|-----------|-----------|---------------|
| 202682_s_at | -1.21 | USP4      | NM_003363 | 3p21.3        |
| 218265_at   | -1.21 | SECISBP2  | NM_024077 | 9q22.2        |
| 203406_at   | -1.22 | MFAP1     | NM_005926 | 15q15-q21     |
| 212507_at   | -1.22 | RW1       | D87446    | 2q11.2        |
| 201517_at   | -1.22 | NCBP2     | BC001255  | 3q29          |
| 201186_at   | -1.22 | LRPAP1    | NM_002337 | 4p16.3        |
| 212696_s_at | -1.22 | C4orf8    | BF968633  | 4p16.3        |
| 203218_at   | -1.22 | MAPK9     | W37431    | 5q35          |
| 201597_at   | -1.22 | COX7A2    | NM_001865 | 6q12          |
| 204045_at   | -1.22 | TCEAL1    | NM_004780 | Xq22.1        |
| 218780_at   | -1.23 | HOOK2     | NM_013312 | 19p13.2       |
| 218996_at   | -1.23 | TFPT      | NM_013342 | 19q13         |
| 213702_x_at | -1.23 | ASAH1     | A1934569  | 8p22-p21.3    |
| 203613_s_at | -1.23 | NDUFB6    | NM_002493 | 9p13.3        |
| 203459_s_at | -1.23 | VPS16     | NM_022575 | chr20         |
| 205553_s_at | -1.24 | CSRP3     | NM_003476 | 11p15.1       |
| 202077_at   | -1.24 | NDUFAB1   | NM_005003 | 16p12.3       |
| 201840_at   | -1.25 | NEDD8     | NM_006156 | 14q11.2       |
| 203858_s_at | -1.25 | COX10     | NM_001303 | 17p12-17p11.2 |
| 219274_at   | -1.25 | TSPAN12   | NM_012338 | 7q31.31       |
| 219449_s_at | -1.25 | TMEM70    | BC002748  | 8q13.3        |
| 218671_s_at | -1.26 | ATPIF1    | NM_016311 | ---           |
| 208687_x_at | -1.26 | HSPA8     | AF352832  | 11q24.1       |
| 209075_s_at | -1.26 | ISCU      | AY009128  | 12q24.1       |
| 203862_s_at | -1.26 | ACTN2     | H16245    | 1q42-q43      |
| 218254_s_at | -1.26 | SAR1B     | NM_016103 | 5q31.2        |
| 219129_s_at | -1.26 | SAP30L    | NM_024632 | 5q33.2        |
| 209080_x_at | -1.26 | PICOT     | AF118652  | 6p25.3        |
| 219433_at   | -1.26 | BCOR      | NM_017745 | Xp11.4        |
| 213149_at   | -1.27 | DLAT      | AW299740  | 11q23.1       |
| 209233_at   | -1.27 | EMG1      | U72514    | 12p13         |
| 218093_s_at | -1.27 | ANKRD10   | NM_017664 | 13q34         |
| 201192_s_at | -1.27 | PITPNA    | NM_006224 | 17p13.3       |
| 221636_s_at | -1.27 | MOSC2     | AL136931  | 1q42.11       |
| 207507_s_at | -1.27 | ATP5G3    | NM_001689 | 2q31.2        |
| 212441_at   | -1.27 | KIAA0232  | D86985    | 4p16.1        |
| 204706_at   | -1.27 | INPP5E    | NM_019892 | 9q34.3        |
| 220934_s_at | -1.28 | MGC3196   | NM_024084 | ---           |
| 218238_at   | -1.28 | GTPBP4    | NM_012341 | 10p15-p14     |
| 203737_s_at | -1.28 | PPRC1     | NM_015062 | 10q24.32      |
| 217772_s_at | -1.28 | MTCH2     | NM_014342 | 11p11.2       |
| 220526_s_at | -1.28 | MRPL20    | NM_017971 | 1p36.3-p36.2  |
| 201460_at   | -1.28 | MAPKAPK2  | A1141802  | 1q32          |
| 201937_s_at | -1.28 | DNPEP     | NM_012100 | 2q36.1        |
| 204842_x_at | -1.28 | PRKAR2A   | BC002763  | 3p21.3-p21.2  |
| 207335_x_at | -1.28 | ATP5I     | NM_007100 | 4p16.3        |
| 203606_at   | -1.28 | NDUFS6    | NM_004553 | 5p15.33       |
| 206688_s_at | -1.28 | CPSF4     | NM_006693 | 7q22.1        |
| 213196_at   | -1.28 | ZNF629    | A1924293  | chr16         |
| 203051_at   | -1.29 | BAHD1     | NM_014952 | 15q14         |
| 53987_at    | -1.29 | RANBP10   | AL041852  | 16q22.1       |
| 208909_at   | -1.29 | UQCRFS1   | BC000649  | 19q12-q13.1   |
| 209142_s_at | -1.29 | UBE2G1    | BC002775  | 1q42          |
| 217746_s_at | -1.29 | PDCD6IP   | NM_013374 | 3p22.3        |
| 222010_at   | -1.29 | ACAT2     | BF224073  | 6q25.3-q26    |
| 209039_x_at | -1.30 | EHD1      | AF001434  | 11q13         |
| 221434_s_at | -1.30 | C14orf156 | NM_031210 | 14q24.3       |
| 200694_s_at | -1.30 | DDX24     | NM_020414 | 14q32         |
| 212505_s_at | -1.30 | KIAA0892  | AL110250  | 19p13.11      |
| 208967_s_at | -1.30 | AK2       | U39945    | 1p34          |
| 218716_x_at | -1.30 | MTO1      | NM_012123 | 6q14.1        |
| 213011_s_at | -1.30 | TPI1      | BF116254  | chr12         |
| 209439_s_at | -1.30 | PHKA2     | D38616    | Xp22.2-p22.1  |
| 203118_at   | -1.31 | PCSK7     | NM_004716 | 11q23-q24     |

|             |       |              |           |                |
|-------------|-------|--------------|-----------|----------------|
| 205963_s_at | -1.31 | DNAJA3       | NM_005147 | 16p13.3        |
| 202093_s_at | -1.31 | PAF1         | NM_019088 | 19q13.1        |
| 202263_at   | -1.31 | CYB5R1       | NM_016243 | 1p36.13-q41    |
| 202427_s_at | -1.31 | BRP44        | NM_015415 | 1q24           |
| 205633_s_at | -1.31 | ALAS1        | NM_000688 | 3p21.1         |
| 200976_s_at | -1.31 | TAX1BP1      | AF090891  | 7p15           |
| 203391_at   | -1.32 | FKBP2        | NM_004470 | 11q13.1-q13.3  |
| 203832_at   | -1.32 | SNRPF        | NM_003095 | 12q23.1        |
| 219116_s_at | -1.32 | DCUN1D2      | NM_018185 | 13q34          |
| 214531_s_at | -1.32 | SNX1         | AF065484  | 15q22.1        |
| 221255_s_at | -1.32 | TMEM93       | NM_031298 | 17p13.3        |
| 218419_s_at | -1.32 | TMUB2        | NM_024107 | 17q21.31       |
| 218307_at   | -1.32 | RSAD1        | NM_018346 | 17q21.33       |
| 201757_at   | -1.32 | NDUFS5       | NM_004552 | 1p34.2-p33     |
| 200764_s_at | -1.32 | CTNNA1       | AI826881  | 5q31           |
| 218160_at   | -1.32 | NDUFA8       | NM_014222 | 9q33.2-q34.11  |
| 201226_at   | -1.33 | NDUFB8       | NM_005004 | 10q23.2-q23.33 |
| 215749_s_at | -1.33 | GORASP1      | AK001574  | 3p22-p21.33    |
| 207302_at   | -1.34 | SGCG         | NM_000231 | 13q12          |
| 212783_at   | -1.34 | RBBP6        | AK026954  | 16p12.2        |
| 202230_s_at | -1.34 | CHERP        | NM_006387 | 19p13.1        |
| 210574_s_at | -1.34 | NUDC         | AF241788  | 1p35-p34       |
| 214027_x_at | -1.34 | DES          | AA889653  | 2q35           |
| 217976_s_at | -1.34 | DNCL11       | NM_016141 | 3p22.3         |
| 209084_s_at | -1.34 | RFC1         | BE504689  | 4p14-p13       |
| 201740_at   | -1.35 | NDUFS3       | NM_004551 | 11p11.11       |
| 212228_s_at | -1.35 | DKFZP434K046 | AC004382  | 16q13          |
| 203230_at   | -1.35 | DVL1         | AF006011  | 1p36           |
| 218682_s_at | -1.35 | SLC4A1AP     | NM_018158 | 2p23.3         |
| 221897_at   | -1.35 | TRIM52       | AA205660  | 5q35.3         |
| 203647_s_at | -1.36 | FDX1         | NM_004109 | 11q22          |
| 200850_s_at | -1.36 | AHCYL1       | NM_006621 | 1p12           |
| 208918_s_at | -1.36 | CDC2L2       | BE674658  | 1p36.33-p36.21 |
| 201377_at   | -1.36 | UBAP2L       | NM_014847 | 1q22           |
| 203517_at   | -1.36 | MTX2         | NM_006554 | 2q31.2         |
| 200070_at   | -1.36 | C2orf24      | BC001393  | 2q36.1         |
| 204824_at   | -1.36 | ENDOG        | NM_004435 | 9q34.1         |
| 212088_at   | -1.36 | PMPCA        | BF570122  | 9q34.3         |
| 208424_s_at | -1.37 | CIAPIN1      | NM_020313 | 16q13-q21      |
| 218771_at   | -1.37 | PANK4        | NM_018216 | 1p36.32        |
| 202401_s_at | -1.37 | SRF          | NM_003131 | 6p21.1         |
| 219185_at   | -1.37 | SIRT5        | NM_012241 | 6p23           |
| 205052_at   | -1.37 | AUH          | NM_001698 | 9q22.31        |
| 221746_at   | -1.37 | UBL4         | BE543027  | Xq28           |
| 205562_at   | -1.38 | RPP38        | NM_006414 | 10p13          |
| 213398_s_at | -1.38 | C14orf124    | AI347090  | 14q11.2        |
| 218506_x_at | -1.38 | N-PAC        | NM_018459 | 16p13.3        |
| 221692_s_at | -1.38 | MRPL34       | AB049652  | 19p13.1        |
| 31874_at    | -1.38 | GAS2L1       | Y07846    | 22q12.2        |
| 202825_at   | -1.38 | SLC25A4      | NM_001151 | 4q35           |
| 203814_s_at | -1.38 | NQO2         | NM_000904 | 6pter-q12      |
| 217722_s_at | -1.39 | NGRN         | NM_016645 | 15q26.1        |
| 221506_s_at | -1.39 | TNPO2        | BG258639  | 19p13.2        |
| 203511_s_at | -1.39 | TRAPPC3      | AF041432  | 1p34.3         |
| 213462_at   | -1.39 | NPAS2        | AW000928  | 2q11.2         |
| 205300_s_at | -1.40 | U1SNRNPBP    | NM_022717 | 12q24.31       |
| 214679_x_at | -1.40 | NCLN         | AL110227  | 19p13.3        |
| 201966_at   | -1.40 | NDUFS2       | NM_004550 | 1q23           |
| 212852_s_at | -1.40 | SSA2         | AL538601  | 1q31           |
| 205241_at   | -1.40 | SCO2         | NM_005138 | 22q13.33       |
| 209248_at   | -1.41 | GHITM        | AL136713  | 10q23.2        |
| 219045_at   | -1.41 | RHOF         | NM_019034 | 12q24.31       |
| 214141_x_at | -1.41 | SFRS7        | BF033354  | 2p22.1         |
| 212872_s_at | -1.41 | TRFP         | AK023092  | 6p21.1         |

|             |       |           |           |               |
|-------------|-------|-----------|-----------|---------------|
| 41037_at    | -1.42 | RTEF1     | U63824    | 12p13.2-p13.3 |
| 205219_s_at | -1.42 | GALK2     | NM_002044 | 15q15.3       |
| 218916_at   | -1.42 | ZNF768    | NM_024671 | 16p11.2       |
| 213104_at   | -1.42 | C16orf42  | AI799802  | 16p13.3       |
| 208827_at   | -1.42 | PSMB6     | BC000835  | 17p13         |
| 219310_at   | -1.42 | C20orf39  | NM_024893 | 20p11.21      |
| 219142_at   | -1.42 | RASL11B   | NM_023940 | 4q12          |
| 208772_at   | -1.42 | ANKHD1    | AU160676  | 5q31.3        |
| 220966_x_at | -1.42 | ARPC5L    | NM_030978 | 9q34.11       |
| 203827_at   | -1.43 | WIPI1     | NM_017983 | 17q24.3       |
| 204868_at   | -1.43 | ICT1      | NM_001545 | 17q25.2       |
| 204122_at   | -1.43 | TYROBP    | NM_003332 | 19q13.1       |
| 201032_at   | -1.43 | BLCAP     | NM_006698 | 20q11.2-q12   |
| 203340_s_at | -1.43 | SLC25A12  | AI887457  | 2q24          |
| 203880_at   | -1.43 | COX17     | NM_005694 | 3q13.33       |
| 205181_at   | -1.43 | ZNF193    | NM_006299 | 6p21.3        |
| 216841_s_at | -1.43 | SOD2      | X15132    | 6q25.3        |
| 211784_s_at | -1.44 | SFRS1     | BC006181  | ---           |
| 1487_at     | -1.44 | ESRRA     | L38487    | 11q13         |
| 201491_at   | -1.44 | AHSA1     | NM_012111 | 14q23.3-31    |
| 212456_at   | -1.44 | KIAA0664  | AB014564  | 17p13.3       |
| 204547_at   | -1.44 | RAB40B    | NM_006822 | 17q25.3       |
| 202224_at   | -1.45 | CRK       | NM_016823 | ---           |
| 219244_s_at | -1.45 | MRPL46    | NM_022163 | 15q24-q25     |
| 218372_at   | -1.45 | MED9      | NM_018019 | 17p11.2       |
| 219212_at   | -1.46 | HSPA14    | NM_016299 | 10p14         |
| 201489_at   | -1.46 | PPIF      | BC005020  | 10q22-q23     |
| 204257_at   | -1.46 | FADS3     | NM_021727 | 11q12-q13.1   |
| 218572_at   | -1.46 | CHMP4A    | NM_014169 | 14q11.2       |
| 202070_s_at | -1.46 | IDH3A     | NM_005530 | 15q25.1-q25.2 |
| 217727_x_at | -1.46 | VPS35     | NM_018206 | 16q12         |
| 201157_s_at | -1.46 | NMT1      | AF020500  | 17q21.31      |
| 204937_s_at | -1.46 | ZNF274    | NM_016325 | 19qter        |
| 200980_s_at | -1.46 | MAP3K15   | BF739979  | Xp22.2-p22.1  |
| 213507_s_at | -1.47 | KPNB1     | BG249565  | 17q21.32      |
| 208478_s_at | -1.47 | BAX       | NM_004324 | 19q13.3-q13.4 |
| 218548_x_at | -1.47 | TEX264    | NM_015926 | 3p21.31       |
| 204245_s_at | -1.48 | RPP14     | NM_007042 | 3p21.2        |
| 203203_s_at | -1.50 | KRR1      | NM_007043 | 12q21.1       |
| 218068_s_at | -1.50 | ZNF672    | NM_024836 | 1q44          |
| 201739_at   | -1.50 | SGK       | NM_005627 | 6q23          |
| 218434_s_at | -1.52 | AACS      | NM_023928 | 12q24.31      |
| 219526_at   | -1.52 | C14orf169 | NM_024644 | 14q24.2       |
| 214882_s_at | -1.52 | SFRS2     | BG254869  | 17q25.3       |
| 221031_s_at | -1.53 | APOLD1    | NM_030817 | 12p13.2       |
| 212877_at   | -1.53 | KNS2      | AA284075  | 14q32.3       |
| 201967_at   | -1.54 | RBM6      | NM_005777 | 3p21.3        |
| 205295_at   | -1.55 | CKMT2     | NM_001825 | 5q13.3        |
| 221517_s_at | -1.56 | CRSP6     | AF105421  | 11q14         |
| 59625_at    | -1.57 | NOL3      | AI912351  | 16q22.1       |
| 208498_s_at | -1.57 | AMY1A     | NM_004038 | 1p21          |
| 209252_at   | -1.58 | HARSL     | U18937    | 5q31.3        |
| 217526_at   | -1.59 | NFATC2IP  | AI478300  | 16p12.1       |
| 201422_at   | -1.59 | IFI30     | NM_006332 | 19p13.1       |
| 201323_at   | -1.59 | EBNA1BP2  | NM_006824 | 1p35-p33      |
| 203598_s_at | -1.60 | WBP4      | AK000979  | 13q13.3       |
| 212848_s_at | -1.60 | C9orf3    | BG036668  | 9q22.33       |
| 218744_s_at | -1.61 | PACSIN3   | NM_016223 | 11p12-p11.12  |
| 217959_s_at | -1.61 | TRAPPC4   | NM_016146 | 11q23.3       |
| 220225_at   | -1.61 | IRX4      | NM_016358 | 5p15.3        |
| 205356_at   | -1.62 | USP13     | NM_003940 | 3q26.2-q26.3  |
| 219006_at   | -1.63 | C6orf66   | NM_014165 | 6q16.3        |
| 208813_at   | -1.64 | GOT1      | BC000498  | 10q24.1-q25.1 |
| 206453_s_at | -1.64 | NDRG2     | NM_016250 | 14q11.2       |



|             |       |          |           |               |
|-------------|-------|----------|-----------|---------------|
| 204331_s_at | -1.64 | MRPS12   | AA587905  | 19q13.1-q13.2 |
| 200768_s_at | -1.64 | MAT2A    | BC001686  | 2p11.2        |
| 201248_s_at | -1.65 | SREBF2   | NM_004599 | 22q13         |
| 205738_s_at | -1.66 | FABP3    | NM_004102 | 1p33-p32      |
| 209700_x_at | -1.66 | PDE4DIP  | AB042555  | 1q12          |
| 222025_s_at | -1.66 | OPLAH    | AI991887  | 8q24.3        |
| 219269_at   | -1.67 | HMBOX1   | NM_024567 | 8p21.1        |
| 219032_x_at | -1.68 | CHML     | NM_014322 | 1q43          |
| 203252_at   | -1.69 | CDK2AP2  | NM_005851 | 11q13         |
| 200692_s_at | -1.70 | HSPA9    | NM_004134 | 5q31.1        |
| 203367_at   | -1.72 | DUSP14   | NM_007026 | 17q12         |
| 207791_s_at | -1.72 | RAB1A    | NM_004161 | 2p14          |
| 204186_s_at | -1.72 | PPID     | AI014573  | 4q31.3        |
| 211990_at   | -1.72 | HLA-DPA1 | M27487    | 6p21.3        |
| 217759_at   | -1.76 | TRIM44   | AA176780  | 11p13         |
| 215193_x_at | -1.83 | HLA-DRB1 | AJ297586  | 6p21.3        |
| 215210_s_at | -1.86 | DLST     | S72422    | 14q24.3       |
| 217356_s_at | -1.89 | PGK1     | S81916    | Xq13          |
| 220858_at   | -1.93 | PRO0618  | NM_014133 | 4q35.1        |
| 204963_at   | -2.04 | SSPN     | AL136756  | 12p11.2       |
| 215795_at   | -2.16 | MYH7B    | AK000947  | 20q11.23      |
| 202416_at   | -2.26 | DNAJC7   | NM_003315 | 17q11.2       |
| 209774_x_at | -2.26 | CXCL2    | M57731    | 4q21          |
| 205493_s_at | -2.37 | DPYSL4   | NM_006426 | 10q26         |
| 205805_s_at | -2.37 | ROR1     | NM_005012 | 1p32-p31      |
