# Supplementary material for: Altered expression of mitochondrial and extracellular matrix genes in the heart of human fetuses with chromosome 21 trisomy
Source: PubMed Central journal article supplement (PMC1964766; doi:10.1186/1471-2164-8-268), 2007-08-07
Supplement: 1471-2164-8-268-S7.pdf [file 1471-2164-8-268-S7.pdf]

# CONDITION TREE

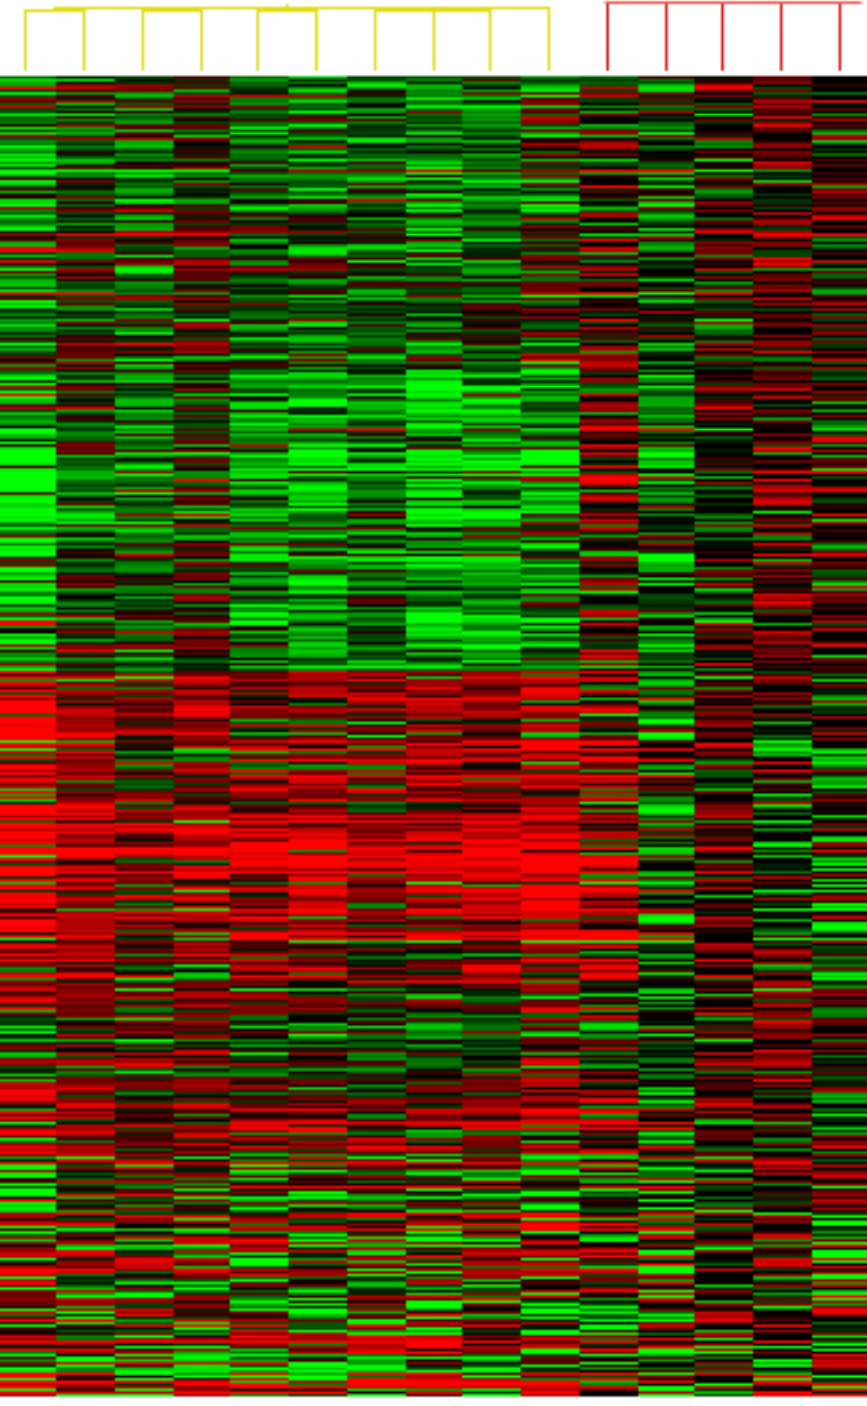

Name CDH1 , Type DSH  
 Name DH3 , Type DSH  
 Name CDH2 , Type DSH  
 Name DH1 , Type DSH  
 Name CDH5 , Type DSH  
 Name DH4 , Type DSH  
 Name CDH6 , Type DSH  
 Name DH5 , Type DSH  
 Name DH6 , Type DSH  
 Name CDH4 , Type DSH  
 Name H3 , Type NH  
 Name H5 , Type NH  
 Name H4 , Type NH  
 Name H1 , Type NH  
 Name H2 , Type NH
