# Supplementary material for: Altered expression of mitochondrial and extracellular matrix genes in the heart of human fetuses with chromosome 21 trisomy
Source: PubMed Central journal article supplement (PMC1964766; doi:10.1186/1471-2164-8-268), 2007-08-07
Supplement: 1471-2164-8-268-S8.pdf [file 1471-2164-8-268-S8.pdf]

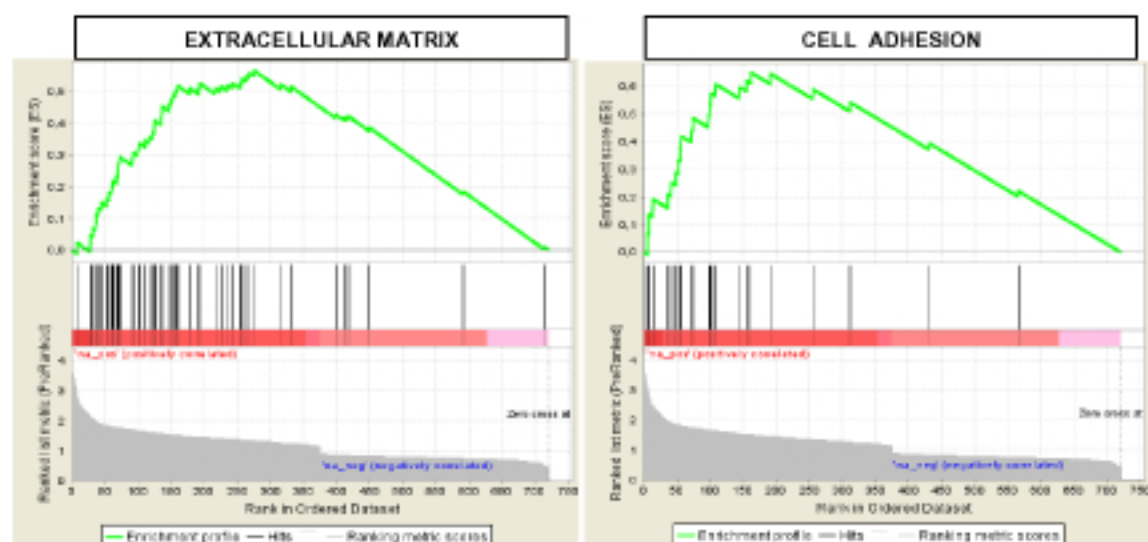

### GSEA Report for Upregulated Genes in the DSH versus NH comparison

| GENE SET NAME                 | SIZE | ES     | Nom p-value | FDR     |
|-------------------------------|------|--------|-------------|---------|
| EXTRACELLULAR MATRIX GO:31012 | 53   | 0,5660 | <0,001      | <0,0001 |
| CELL_ADHESION                 | 15   | 0,5872 | <0,001      | 0,0178  |

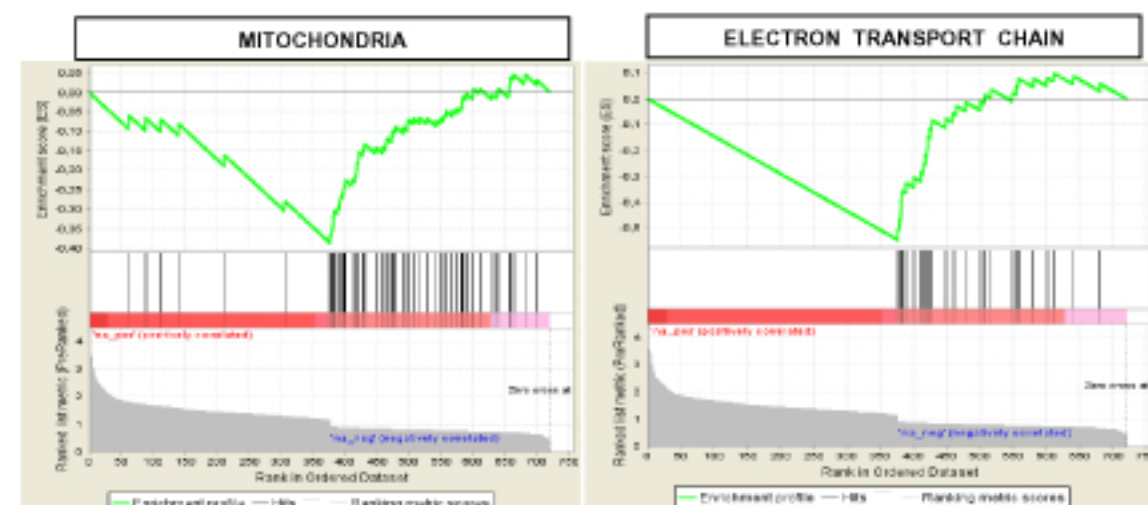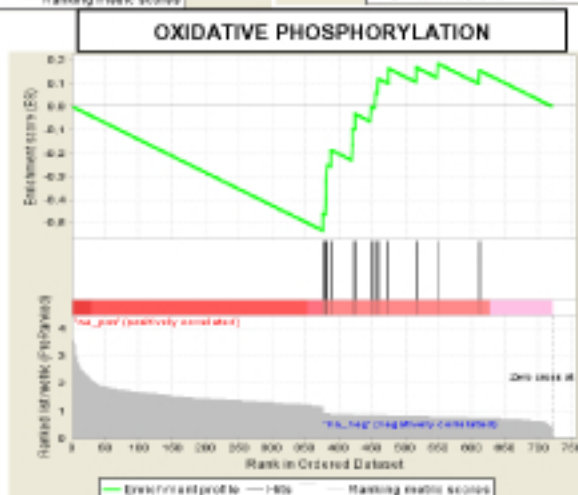

### GSEA Report for Downregulated Genes in the DSH versus NH comparison

| GENE SET NAME             | SIZE | ES      | Nom p-value | FDR     |
|---------------------------|------|---------|-------------|---------|
| MITOCHONDRIA              | 62   | -0,3865 | <0,001      | <0,0001 |
| ELECTRON_TRANSPORT_CHAIN  | 29   | -0,5448 | <0,001      | <0,0001 |
| OXIDATIVE_PHOSPHORYLATION | 15   | -0,5340 | <0,001      | 0,0004  |
